# Supplementary material for: Preliminary Validation of a High Docosahexaenoic Acid (DHA) and -Linolenic Acid (ALA) Dietary Oil Blend: Tissue Fatty Acid Composition and Liver Proteome Response in Atlantic Salmon (Salmo salar) Smolts
Source: PLoS One. 2016 Aug 24;11(8):e0161513. doi: 10.1371/journal.pone.0161513 (PMC4996530; doi:10.1371/journal.pone.0161513)
Supplement: S1 File — (XLSX) [file pone.0161513.s002.xlsx]

## Sheet: Peptides
Sequence	N-term cleavage window	C-term cleavage window	Amino acid before	First amino acid	Second amino acid	Second last amino acid	Last amino acid	Amino acid after	A Count	R Count	N Count	D Count	C Count	Q Count	E Count	G Count	H Count	I Count	L Count	K Count	M Count	F Count	P Count	S Count	T Count	W Count	Y Count	V Count	U Count	Length	Missed cleavages	Mass	Proteins	Leading razor protein	Start position	End position	Unique (Groups)	Unique (Proteins)	Charges	PEP	Score	Identification type FO_1	Identification type FO_2	Identification type FO_3	Identification type FO_4	Identification type FOPO_1	Identification type FOPO_2	Identification type FOPO_3	Identification type FOPO_4
AAAGGIVDAGPAYEK	RDYSTKSKAAAGGIVD	DAGPAYEKGVSEEITK	K	A	A	E	K	G	5	0	0	1	0	0	1	3	0	1	0	1	0	0	1	0	0	0	1	1	0	15	0	1388.69	ACN12405.1;ACN10058.1;ACI66296.1	ACN12405.1	58	72	yes	no	2	3.0096e-07	153.7	By MS/MS	By MS/MS	By MS/MS	By MS/MS	By MS/MS	By MS/MS	By MS/MS	By matching
AAAGGIVDAGPSYEK	RDYSTKSKAAAGGIVD	DAGPSYEKGVSEEITK	K	A	A	E	K	G	4	0	0	1	0	0	1	3	0	1	0	1	0	0	1	1	0	0	1	1	0	15	0	1404.69	ACN12338.1;ACN09991.1;ACI66451.1;ACI67329.1	ACN12338.1	58	72	yes	no	2	2.9149e-08	158.93	By MS/MS	By MS/MS	By MS/MS	By MS/MS	By MS/MS	By MS/MS	By MS/MS	By MS/MS
AAAMKDEFIK	VIQTELERAAAMKDEF	AMKDEFIKEFSEEDYL	R	A	A	I	K	E	3	0	0	1	0	0	1	0	0	1	0	2	1	1	0	0	0	0	0	0	0	10	1	1122.57	NP_001167350.1;ACN11445.1	NP_001167350.1	450	459	yes	no	2	0.00021526	166.86	By MS/MS	By MS/MS	By MS/MS	By MS/MS	By MS/MS	By MS/MS	By MS/MS	By MS/MS
AAAQEFLGR	WGKGYSRKAAAQEFLG	AAQEFLGRFEDAKLTY	K	A	A	G	R	F	3	1	0	0	0	1	1	1	0	0	1	0	0	1	0	0	0	0	0	0	0	9	0	961.498	ACI32973.1;ACH70720.1	ACI32973.1	79	87	yes	no	2	4.1683e-10	176.33	By MS/MS	By matching	By matching	By matching	By MS/MS	By matching	By matching	By MS/MS
AAASLPYAQGMEK	VACVRALRAAASLPYA	PYAQGMEKERELMATL	R	A	A	E	K	E	4	0	0	0	0	1	1	1	0	0	1	1	1	0	1	1	0	0	1	0	0	13	0	1335.65	NP_001133776.1;ACI33880.1	NP_001133776.1	238	250	yes	no	2	0.022549	63.185	By matching	By matching	By matching	By matching	By matching	By matching	By matching	By MS/MS
AAAVTMPTMR	KAEDATTKAAAVTMPT	AVTMPTMR________	K	A	A	M	R	-	3	1	0	0	0	0	0	0	0	0	0	0	2	0	1	0	2	0	0	1	0	10	0	1047.52	NP_001136188.1;ACI34215.1	NP_001136188.1	515	524	yes	no	2	0.0024802	92.538	By MS/MS	By MS/MS	By MS/MS	By MS/MS	By MS/MS	By MS/MS	By MS/MS	By MS/MS
AADGILLNACCPGWVR	AHILTKTRAADGILLN	ACCPGWVRTDMAGSKA	R	A	A	V	R	T	3	1	1	1	2	0	0	2	0	1	2	0	0	0	1	0	0	1	0	1	0	16	0	1771.85	ACI67769.1;ACI34069.1;ACI69439.1;ADM16272.1;ACI67351.1	ACI67769.1	216	231	no	no	2	3.5386e-34	250.52	By matching	By MS/MS	By MS/MS	By MS/MS	By MS/MS	By MS/MS	By MS/MS	By MS/MS
AAEADHIIDYLK	SVMRLEQRAAEADHII	DHIIDYLKQQVQLLKE	R	A	A	L	K	Q	3	0	0	2	0	0	1	0	1	2	1	1	0	0	0	0	0	0	1	0	0	12	0	1357.69	ACH85317.1	ACH85317.1	27	38	yes	yes	2	0.00011232	118.61	By matching	By matching	By matching	By matching	By matching	By matching	By matching	By matching
AAEEAMLSDMDENNPGTEWER	EKTKVNNRAAEEAMLS	NPGTEWERVARLCDFN	R	A	A	E	R	V	3	1	2	2	0	0	5	1	0	0	1	0	2	0	1	1	1	1	0	0	0	21	0	2393.97	ACI66599.1;ACI33758.1	ACI66599.1	155	175	yes	no	2	1.0723e-66	299.43	By MS/MS	By MS/MS	By MS/MS	By MS/MS	By MS/MS	By MS/MS	By MS/MS	By MS/MS
AAELPHMDIEALK	QQHCDEAKAAELPHMD	HMDIEALKKLNKNKKM	K	A	A	L	K	K	3	0	0	1	0	0	2	0	1	1	2	1	1	0	1	0	0	0	0	0	0	13	0	1436.73	ACI69507.1;ACN12584.1;ACN12199.1;ACN10229.1;ACN09852.1;ACI67025.1;ACH70975.1;ACI69173.1;NP_001133205.1;ACN12174.1;ACN09827.1;ACH70976.1	ACI69507.1	78	90	yes	no	2	5.4915e-11	190.85	By MS/MS	By MS/MS	By MS/MS	By MS/MS	By MS/MS	By MS/MS	By MS/MS	By MS/MS
AAELSLELGLLYSAPDALK	LVNTVGNRAAELSLEL	YSAPDALKIGLVDQLV	R	A	A	L	K	I	4	0	0	1	0	0	2	1	0	0	6	1	0	0	1	2	0	0	1	0	0	19	0	1973.07	ACN11185.1	ACN11185.1	202	220	yes	yes	2	0.074693	35.133	By matching	By matching	By matching	By matching	By matching	By matching	By matching	By matching
AAFDDAIAELDTLSEESYK	DRACRLAKAAFDDAIA	TLSEESYKDSTLIMQL	K	A	A	Y	K	D	4	0	0	3	0	0	3	0	0	1	2	1	0	1	0	2	1	0	1	0	0	19	0	2086.96	ACI34249.1;ACI33769.1;ACH70649.1	ACI34249.1	197	215	no	no	2	1.2775e-40	248.01	By MS/MS	By MS/MS	By MS/MS	By MS/MS	By MS/MS	By MS/MS	By MS/MS	By MS/MS
AAFDEAIAELDTLNEDSYK	EQACSLAKAAFDEAIA	TLNEDSYKDSTLIMQL	K	A	A	Y	K	D	4	0	1	3	0	0	3	0	0	1	2	1	0	1	0	1	1	0	1	0	0	19	0	2113.97	ACI68704.1	ACI68704.1	194	212	yes	yes	2;3	9.1732e-96	343.69	By MS/MS	By MS/MS	By MS/MS	By MS/MS	By MS/MS	By MS/MS	By MS/MS	By MS/MS
AAFDEAIAELDTLNEDSYKDSTLIMQLLR	EQACSLAKAAFDEAIA	TLIMQLLRDNLTLWTS	K	A	A	L	R	D	4	1	1	4	0	1	3	0	0	2	5	1	1	1	0	2	2	0	1	0	0	29	1	3284.61	ACI68704.1	ACI68704.1	194	222	yes	yes	3;4	2.1698e-14	137.9	By matching	By matching	By MS/MS	By MS/MS	By matching	By matching	By matching	By matching
AAFDKEYGPDR	ESGGKDLKAAFDKEYG	DKEYGPDRTLFLTCTV	K	A	A	D	R	T	2	1	0	2	0	0	1	1	0	0	0	1	0	1	1	0	0	0	1	0	0	11	1	1267.58	NP_001135022.1;ACN12694.1;ACN10334.1;ACI69905.1	NP_001135022.1	47	57	yes	no	2	0.00042947	145.29	By MS/MS	By MS/MS	By matching	By MS/MS	By MS/MS	By MS/MS	By MS/MS	By MS/MS
AAFLMTQLVVPHMEK	KILDVNVKAAFLMTQL	LVVPHMEKRGGGSVVF	K	A	A	E	K	R	2	0	0	0	0	1	1	0	1	0	2	1	2	1	1	0	1	0	0	2	0	15	0	1713.89	NP_001134438.1;ACI67513.1	NP_001134438.1	148	162	yes	no	2;3	4.4165e-06	147.07	By matching	By matching	By matching	By matching	By MS/MS	By matching	By MS/MS	By matching
AAGCGYDNVVK	VNMGEILKAAGCGYDN	CGYDNVVKTTVLLADM	K	A	A	V	K	T	2	0	1	1	1	0	0	2	0	0	0	1	0	0	0	0	0	0	1	2	0	11	0	1152.52	NP_001134489.1;ACN12713.1;ACN10353.1;ACI67728.1	NP_001134489.1	68	78	yes	no	2	0.00011998	134.57	By MS/MS	By MS/MS	By MS/MS	By MS/MS	By MS/MS	By MS/MS	By MS/MS	By MS/MS
AAGFIDPILVSGTDGVGTK	FAGLFDLKAAGFIDPI	GTDGVGTKLKIAQACQ	K	A	A	T	K	L	2	0	0	2	0	0	0	4	0	2	1	1	0	1	1	1	2	0	0	2	0	19	0	1816.96	ACN10564.1	ACN10564.1	481	499	yes	yes	2	9.973e-16	180.78	By MS/MS	By MS/MS	By MS/MS	By MS/MS	By MS/MS	By MS/MS	By matching	By MS/MS
AAGFPLNDQLFQMIIR	DELPNAFRAAGFPLND	QLFQMIIRRYSDENGN	R	A	A	I	R	R	2	1	1	1	0	2	0	1	0	2	2	0	1	2	1	0	0	0	0	0	0	16	0	1832.96	NP_001167031.1;ACI68381.1;ACH70869.1	NP_001167031.1	148	163	yes	no	2	0.00010381	123.29	By matching	By matching	By MS/MS	By MS/MS	By matching	By matching	By MS/MS	By MS/MS
AAGLSACCK	ADESVLSRAAGLSACC	AGLSACCKEDAVHRGS	R	A	A	C	K	E	3	0	0	0	2	0	0	1	0	0	1	1	0	0	0	1	0	0	0	0	0	9	0	936.416	P21848.1;NP_001117137.1;CAA36643.1;Q03156.1;NP_001117164.1;CAA43187.1	Q03156.1	292	300	no	no	2	0.00032493	149.82	By matching	By matching	By MS/MS	By matching	By MS/MS	By matching	By matching	By matching
AAGTGMMLSSWATSTIEEVR	TATARATRAAGTGMML	TSTIEEVRSSAGDGLL	R	A	A	V	R	S	3	1	0	0	0	0	2	2	0	1	1	0	2	0	0	3	3	1	0	1	0	20	0	2096.99	ACN12757.1;ACN10394.1;NP_001135240.1;ACI33762.1	ACN12757.1	100	119	yes	no	2	1.3243e-16	194.51	By MS/MS	By MS/MS	By MS/MS	By MS/MS	By MS/MS	By MS/MS	By MS/MS	By MS/MS
AAGTLYTYPENWR	________________	YTYPENWRAFKAQIAA	M	A	A	W	R	A	2	1	1	0	0	0	1	1	0	0	1	0	0	0	1	0	2	1	2	0	0	13	0	1540.73	ACM08681.1;ACH85278.1;NP_001135112.1;ACM09182.1;ACI33692.1;ACN12474.1;ACN10123.1;NP_001133235.1;ACH85371.1	ACM08681.1	2	14	yes	no	2	3.0607e-05	137.95	By MS/MS	By MS/MS	By matching	By matching	By MS/MS	By matching	By matching	By matching
AAHDLHMTHK	KEHETYKRAAHDLHMT	HDLHMTHKIGLVEALC	R	A	A	H	K	I	2	0	0	1	0	0	0	0	3	0	1	1	1	0	0	0	1	0	0	0	0	10	0	1159.56	ACN11426.1	ACN11426.1	264	273	yes	yes	2	0.0023114	94.409	By matching	By matching	By MS/MS	By MS/MS	By matching	By MS/MS	By matching	By MS/MS
AAINDGINLSGEGLCFK	TVYTNPKKAAINDGIN	SGEGLCFKLFYVKPDS	K	A	A	F	K	L	2	0	2	1	1	0	1	3	0	2	2	1	0	1	0	1	0	0	0	0	0	17	0	1777.87	ACI68507.1;ACI69590.1;ACN12611.1;ACN10994.1;ACN10255.1;ACI69810.1;ACI69326.1;ACI67916.1;ACI67052.1;ACI66408.1	ACI68507.1	86	102	yes	no	2	1.6927e-19	202.84	By matching	By matching	By matching	By matching	By matching	By matching	By matching	By matching
AAIRDDNPVVFLENELMYGVPFDLSEEVMHK	EDARGLLKAAIRDDNP	LSEEVMHKDFVLPIGK	K	A	A	H	K	D	2	1	2	3	0	0	4	1	1	1	3	1	2	2	2	1	0	0	1	4	0	31	1	3576.73	ACI34116.1	ACI34116.1	220	250	yes	yes	3;4	2.8236e-05	72.935	By matching	By MS/MS	By matching	By matching	By matching	By MS/MS	By matching	By MS/MS
AALEAQGSCLNNK	ASENFCSRAALEAQGS	QGSCLNNKYSEGYPGR	R	A	A	N	K	Y	3	0	2	0	1	1	1	1	0	0	2	1	0	0	0	1	0	0	0	0	0	13	0	1374.66	ACI34054.1	ACI34054.1	83	95	yes	yes	2	9.0966e-39	286.09	By MS/MS	By MS/MS	By MS/MS	By MS/MS	By MS/MS	By MS/MS	By MS/MS	By MS/MS
AALGISDTMIR	ASVPESDRAALGISDT	GISDTMIRLSVGLEDE	R	A	A	I	R	L	2	1	0	1	0	0	0	1	0	2	1	0	1	0	0	1	1	0	0	0	0	11	0	1146.61	NP_001133465.1;ACN10804.1;ACI33287.1	NP_001133465.1	369	379	yes	no	2	4.854e-05	147.28	By MS/MS	By MS/MS	By MS/MS	By MS/MS	By MS/MS	By MS/MS	By MS/MS	By MS/MS
AALNMYIAQVK	PSQLEHVKAALNMYIA	NMYIAQVKLTAQRSID	K	A	A	V	K	L	3	0	1	0	0	1	0	0	0	1	1	1	1	0	0	0	0	0	1	1	0	11	0	1220.66	ACI69572.1;P27007.1;NP_001117135.1;CAA36482.1	ACI69572.1	14	24	yes	no	2	2.9134e-16	227.88	By MS/MS	By MS/MS	By MS/MS	By MS/MS	By MS/MS	By MS/MS	By MS/MS	By MS/MS
AALQELLSK	KIRGSLARAALQELLS	ALQELLSKGMIKLVSK	R	A	A	S	K	G	2	0	0	0	0	1	1	0	0	0	3	1	0	0	0	1	0	0	0	0	0	9	0	971.565	AGH92503.1;ACN12526.1;ACN12284.1;ACN10173.1;ACN09937.1;ACI67712.1;ACI66620.1;ACH70866.1;AGH92514.1;ACN12364.1;ACN10017.1;ACI69780.1;ACI68693.1;ACI66416.1;ACI69593.1;ACI68348.1	AGH92503.1	86	94	yes	no	2	0.0001123	164.66	By MS/MS	By MS/MS	By MS/MS	By MS/MS	By MS/MS	By MS/MS	By MS/MS	By MS/MS
AALQGLLHK	LMPHDLARAALQGLLH	ALQGLLHKTSLPKDAV	R	A	A	H	K	T	2	0	0	0	0	1	0	1	1	0	3	1	0	0	0	0	0	0	0	0	0	9	0	949.571	ACN10637.1;ACM08881.1	ACN10637.1	82	90	yes	no	2	0.0013725	112.41	By MS/MS	By MS/MS	By MS/MS	By MS/MS	By MS/MS	By MS/MS	By MS/MS	By MS/MS
AAMFPETVMEGTTILSTQTDPSQMTNVQR	LTRAQRVRAAMFPETV	SQMTNVQRLAEPSQLL	R	A	A	Q	R	L	2	1	1	1	0	3	2	1	0	1	1	0	3	1	2	2	6	0	0	2	0	29	0	3183.49	NP_001133432.1;ACI33223.1;ACI34242.1	NP_001133432.1	77	105	yes	no	3	5.077e-05	69.284	By matching	By matching	By MS/MS	By MS/MS	By MS/MS	By matching	By matching	By matching
AANVTIEPFWPSLFSK	DKLMALIKAANVTIEP	FWPSLFSKALASVDIG	K	A	A	S	K	A	2	0	1	0	0	0	1	0	0	1	1	1	0	2	2	2	1	1	0	1	0	16	0	1805.94	ACM09686.1;ACM08627.1;ACH71044.1;ACN12363.1;ACN10016.1;ACN12471.1;ACN10120.1;ACI66209.1;ACH71045.1	ACM09686.1	34	49	no	no	2	4.5161e-34	246.75	By MS/MS	By MS/MS	By MS/MS	By MS/MS	By MS/MS	By MS/MS	By MS/MS	By MS/MS
AAPEMISMLK	GRLIDAKKAAPEMISM	PEMISMLKRNSCGKSL	K	A	A	L	K	R	2	0	0	0	0	0	1	0	0	1	1	1	2	0	1	1	0	0	0	0	0	10	0	1089.56	ACI33980.1	ACI33980.1	365	374	yes	yes	2	0.0021523	96.171	By matching	By MS/MS	By MS/MS	By matching	By matching	By MS/MS	By MS/MS	By MS/MS
AAPGYHMAK	RTVIIGGKAAPGYHMA	APGYHMAKMIIKLITA	K	A	A	A	K	M	3	0	0	0	0	0	0	1	1	0	0	1	1	0	1	0	0	0	1	0	0	9	0	944.454	NP_001167051.1;ACN10690.1;ACN60257.1;ACN60290.1	ACN60290.1	36	44	no	no	2	0.00088184	129.47	By MS/MS	By MS/MS	By MS/MS	By matching	By MS/MS	By MS/MS	By MS/MS	By MS/MS
AAPLFGQMYIVSK	PSQKNIYKAAPLFGQM	GQMYIVSKTGVLQVGD	K	A	A	S	K	T	2	0	0	0	0	1	0	1	0	1	1	1	1	1	1	1	0	0	1	1	0	13	0	1423.75	ADM16049.1;ACN12681.1;ACN10321.1;ACI68118.1	ADM16049.1	303	315	yes	no	2	0.0091467	74.649	By matching	By MS/MS	By matching	By matching	By matching	By matching	By matching	By matching
AAQQGADPYSMLKPK	GLEKIVMKAAQQGADP	PYSMLKPKEYAGSKAD	K	A	A	P	K	E	3	0	0	1	0	2	0	1	0	0	1	2	1	0	2	1	0	0	1	0	0	15	1	1603.8	ACN12190.1;ACN12167.1;ACN09843.1;ACN09820.1;ACI69321.1;ACI67325.1;ACI66396.1;ACN12622.1;ACN10266.1	ACN12190.1	51	65	yes	no	2;3	9.6112e-05	132.65	By MS/MS	By MS/MS	By MS/MS	By MS/MS	By matching	By MS/MS	By MS/MS	By MS/MS
AAQTLLWTELFR	DMKSITDRAAQTLLWT	LLWTELFRGLGMTMSY	R	A	A	F	R	G	2	1	0	0	0	1	1	0	0	0	3	0	0	1	0	0	2	1	0	0	0	12	0	1447.78	ACI69375.1;ACI68453.1;ACI66847.1	ACI69375.1	55	66	yes	no	2	8.3244e-07	160.18	By MS/MS	By MS/MS	By MS/MS	By MS/MS	By MS/MS	By MS/MS	By MS/MS	By MS/MS
AARTMQAAR	________________	ARTMQAARCPTDDLSL	M	A	A	A	R	C	4	2	0	0	0	1	0	0	0	0	0	0	1	0	0	0	1	0	0	0	0	9	1	974.508	NP_001133315.1;ACI33015.1	NP_001133315.1	2	10	yes	no	2	0.052918	58.981	By matching	By matching	By MS/MS	By matching	By matching	By matching	By matching	By matching
AASPEGTQEPVNAWTSK	AFPPLPEKAASPEGTQ	PVNAWTSKIRPLKSSV	K	A	A	S	K	I	3	0	1	0	0	1	2	1	0	0	0	1	0	0	2	2	2	1	0	1	0	17	0	1771.84	NP_001167124.1;ACN10888.1	NP_001167124.1	49	65	yes	no	2	1.2511e-27	229.69	By MS/MS	By MS/MS	By MS/MS	By MS/MS	By MS/MS	By MS/MS	By MS/MS	By MS/MS
AATANADSELGAK	ENGAGEEKAATANADS	ADSELGAKLMRRGELN	K	A	A	A	K	L	5	0	1	1	0	0	1	1	0	0	1	1	0	0	0	1	1	0	0	0	0	13	0	1217.59	NP_001167374.1;ACN11503.1	NP_001167374.1	42	54	yes	no	2	2.5269e-05	134.04	By matching	By matching	By MS/MS	By matching	By matching	By matching	By matching	By matching
AATPATNPSQLLPLELVDK	________________	LPLELVDKCIGSRIHI	M	A	A	D	K	C	3	0	1	1	0	1	1	0	0	0	4	1	0	0	3	1	2	0	0	1	0	19	0	1977.08	NP_001140132.1;ACM09721.1;ACM09051.1	NP_001140132.1	2	20	yes	no	2	1.4062e-06	129.46	By MS/MS	By MS/MS	By MS/MS	By matching	By MS/MS	By MS/MS	By matching	By matching
AATSSSETSTIPAFAER	NVTVDYIRAATSSSET	TIPAFAERTCATVTIG	R	A	A	E	R	T	4	1	0	0	0	0	2	0	0	1	0	0	0	1	1	4	3	0	0	0	0	17	0	1724.82	ACN60284.1	ACN60284.1	363	379	yes	yes	2	2.7313e-13	181.51	By MS/MS	By MS/MS	By MS/MS	By MS/MS	By MS/MS	By MS/MS	By MS/MS	By MS/MS
AAVAYVEASK	TQEAEANKAAVAYVEA	VAYVEASKARIGQYEK	K	A	A	S	K	A	4	0	0	0	0	0	1	0	0	0	0	1	0	0	0	1	0	0	1	2	0	10	0	1007.53	NP_001133159.1;ACI69093.1;ACH70827.1;ACN12181.1;ACN09834.1	NP_001133159.1	100	109	no	no	2	0.00051497	125.68	By MS/MS	By MS/MS	By MS/MS	By MS/MS	By MS/MS	By MS/MS	By MS/MS	By MS/MS
AAVDAGYVPNDMQVGQTGK	NAAVGASRAAVDAGYV	MQVGQTGKIVAPELYI	R	A	A	G	K	I	3	0	1	2	0	2	0	3	0	0	0	1	1	0	1	0	1	0	1	3	0	19	0	1919.9	ACH85298.1;ACI67395.1;ACI66876.1;ACI69862.1	ACH85298.1	250	268	yes	no	2	1.5289e-16	195.48	By MS/MS	By MS/MS	By MS/MS	By MS/MS	By MS/MS	By MS/MS	By MS/MS	By matching
AAVEEGIVPGGGCALLR	TDALNATRAAVEEGIV	GGGCALLRSIPALDAL	R	A	A	L	R	S	3	1	0	0	1	0	2	4	0	1	2	0	0	0	1	0	0	0	0	2	0	17	0	1667.87	ACN11370.1;ACN60194.1;AAL29931.1;ACI33148.1	ACI33148.1	430	446	no	no	2	0.00016592	110.22	By MS/MS	By MS/MS	By MS/MS	By MS/MS	By MS/MS	By MS/MS	By MS/MS	By MS/MS
AAVFFGGLSIK	SKYMPTVKAAVFFGGL	FFGGLSIKKDEDVLKK	K	A	A	I	K	K	2	0	0	0	0	0	0	2	0	1	1	1	0	2	0	1	0	0	0	1	0	11	0	1108.63	ACN58701.1;NP_001134851.1;NP_001133080.1;ACN12648.1;ACN10290.1;ACM09195.1;ACI69146.1;ACH70654.1	ACN58701.1	139	149	yes	no	2	5.1743e-05	146.71	By MS/MS	By MS/MS	By MS/MS	By MS/MS	By MS/MS	By MS/MS	By MS/MS	By MS/MS
AAVGDQPVQEVCLCATTK	KEFKDIVKAAVGDQPV	VCLCATTKMLMVRLAD	K	A	A	T	K	M	3	0	0	1	2	2	1	1	0	0	1	1	0	0	1	0	2	0	0	3	0	18	0	1945.92	ACN12579.1;ACN10224.1;ACM08818.1;NP_001134359.1;ACI67207.1	ACN12579.1	142	159	yes	no	2	8.1475e-28	223.86	By matching	By matching	By MS/MS	By matching	By matching	By matching	By matching	By matching
AAVHQLCQSLAGTNSGLPPQAAAVTILPITLDTPMNR	MLGYGMAKAAVHQLCQ	TLDTPMNRKCMPDADV	K	A	A	N	R	K	6	1	2	1	1	3	0	2	1	2	5	0	1	0	4	2	4	0	0	2	0	37	0	3825.99	NP_001134859.1;ACI69178.1	NP_001134859.1	151	187	yes	no	3;4	5.89e-07	74.622	By MS/MS	By MS/MS	By MS/MS	By MS/MS	By MS/MS	By MS/MS	By MS/MS	By MS/MS
AAVPSGASTGIYEALELR	YTKKGLFRAAVPSGAS	IYEALELRDNDKTRYL	R	A	A	L	R	D	4	1	0	0	0	0	2	2	0	1	2	0	0	0	1	2	1	0	1	1	0	18	0	1803.94	ACN12602.1;ACN10247.1;NP_001133762.1;ACI33856.1;NP_001133366.1;ACI33096.1;CBL79146.1	NP_001133366.1	33	50	no	no	2;3	2.1531e-34	237.46	By MS/MS	By MS/MS	By MS/MS	By MS/MS	By MS/MS	By MS/MS	By MS/MS	By MS/MS
AAVPSGASTGVHEALELR	YTAKGRFRAAVPSGAS	VHEALELRDGDKSRYL	R	A	A	L	R	D	4	1	0	0	0	0	2	2	1	0	2	0	0	0	1	2	1	0	0	2	0	18	0	1763.92	NP_001133193.1;B5DGQ7.1;ACH70932.1;ACH70931.1	NP_001133193.1	33	50	yes	no	2;3	1.585e-10	175.39	By MS/MS	By MS/MS	By MS/MS	By MS/MS	By MS/MS	By MS/MS	By MS/MS	By MS/MS
AAYQVAALPR	FSSSFPARAAYQVAAL	YQVAALPRGGLVEIEA	R	A	A	P	R	G	4	1	0	0	0	1	0	0	0	0	1	0	0	0	1	0	0	0	1	1	0	10	0	1058.59	ACM08612.1	ACM08612.1	108	117	yes	yes	2	0.0006629	119.62	By MS/MS	By MS/MS	By MS/MS	By MS/MS	By MS/MS	By MS/MS	By MS/MS	By matching
AAYQVVALPR	FNKNFPARAAYQVVAL	YQVVALPRGGLVEIEA	R	A	A	P	R	G	3	1	0	0	0	1	0	0	0	0	1	0	0	0	1	0	0	0	1	2	0	10	0	1086.62	NP_001134489.1;ACN12713.1;ACN10353.1;ACI67728.1	NP_001134489.1	108	117	yes	no	2	2.4091e-05	168.83	By MS/MS	By MS/MS	By MS/MS	By MS/MS	By MS/MS	By MS/MS	By MS/MS	By MS/MS
AAYSFYNVHTTTTLLDLMSDALILAK	HPVHRSLKAAYSFYNV	SDALILAKSKGFDVFN	K	A	A	A	K	S	4	0	1	2	0	0	0	0	1	1	5	1	1	1	0	2	4	0	2	1	0	26	0	2871.47	ACN58721.1	ACN58721.1	146	171	yes	yes	3	0.0015841	59.539	By matching	By MS/MS	By matching	By MS/MS	By matching	By MS/MS	By MS/MS	By matching
ACADPAAGSVILLENLR	CVGPEVEKACADPAAG	VILLENLRFHVAEEGK	K	A	C	L	R	F	4	1	1	1	1	0	1	1	0	1	3	0	0	0	1	1	0	0	0	1	0	17	0	1768.91	ACH70652.1	ACH70652.1	107	123	yes	yes	2;3	2.0368e-27	221.85	By MS/MS	By MS/MS	By MS/MS	By MS/MS	By MS/MS	By MS/MS	By MS/MS	By MS/MS
ACGTPHSHTKPYIR	EVYRHFGKACGTPHSH	SHTKPYIRSKGRKFER	K	A	C	I	R	S	1	1	0	0	1	0	0	1	2	1	0	1	0	0	2	1	2	0	1	0	0	14	1	1623.79	ACH85360.1;ACN12347.1;ACN10000.1;ACI68700.1	ACH85360.1	154	167	yes	no	2;3	1.6474e-07	167.22	By MS/MS	By MS/MS	By MS/MS	By MS/MS	By MS/MS	By MS/MS	By MS/MS	By MS/MS
ACGVSRPVIATSITIK	RSKQALGRACGVSRPV	IATSITIKEGSQLKPQ	R	A	C	I	K	E	2	1	0	0	1	0	0	1	0	3	0	1	0	0	1	2	2	0	0	2	0	16	1	1671.93	ACI67639.1	ACI67639.1	92	107	yes	yes	3	0.032412	57.267	By matching	By matching	By matching	By MS/MS	By matching	By matching	By matching	By matching
ACIPFTACMAALSEPETLTDFWSSAAQAK	APPPAPVRACIPFTAC	WSSAAQAKTTATKTTR	R	A	C	A	K	T	7	0	0	1	2	1	2	0	0	1	2	1	1	2	2	3	3	1	0	0	0	29	0	3173.45	NP_001135286.1;ACI34254.1	NP_001135286.1	523	551	yes	no	3	0.0029536	47.806	By matching	By matching	By matching	By MS/MS	By matching	By matching	By matching	By matching
ACLSAAEEK	DQLEKTVKACLSAAEE	CLSAAEEKKLKSVAFP	K	A	C	E	K	K	3	0	0	0	1	0	2	0	0	0	1	1	0	0	0	1	0	0	0	0	0	9	0	977.449	ACM08922.1;ACI33732.1	ACM08922.1	295	303	yes	no	2	0.00074825	134.23	By matching	By matching	By MS/MS	By matching	By matching	By matching	By matching	By matching
ACNCLLLK	IQQAVEKKACNCLLLK	ACNCLLLKVNQIGSVT	K	A	C	L	K	V	1	0	1	0	2	0	0	0	0	0	3	1	0	0	0	0	0	0	0	0	0	8	0	990.499	NP_001133193.1;B5DGQ7.1;ACH70932.1;ACH70931.1;NP_001135172.1;ACH70930.1;ACN12602.1;ACN10247.1;NP_001133762.1;ACI33856.1;NP_001133366.1;ACI33096.1;CBL79146.1	NP_001133366.1	336	343	no	no	2	0.00058869	129.68	By matching	By matching	By MS/MS	By matching	By matching	By matching	By matching	By MS/MS
ACQEEFIK	GGKPENGKACQEEFIK	ACQEEFIKRALNNSKA	K	A	C	I	K	R	1	0	0	0	1	1	2	0	0	1	0	1	0	1	0	0	0	0	0	0	0	8	0	1023.47	NP_001167391.1;ACN10700.1	NP_001167391.1	322	329	yes	no	2	0.00066641	114.89	By MS/MS	By MS/MS	By MS/MS	By MS/MS	By MS/MS	By MS/MS	By MS/MS	By MS/MS
ACQSIYPLHDVYVR	SVGKDIEKACQSIYPL	PLHDVYVRKVKMLKKP	K	A	C	V	R	K	1	1	0	1	1	1	0	0	1	1	1	0	0	0	1	1	0	0	2	2	0	14	0	1719.84	NP_001134789.1;B5DGL6.1;ADM16028.1;ACN12266.1;ACN09919.1;ACI69899.1;ACI68885.1;ACI67043.1;ACI66415.1;ACH70890.1	NP_001134789.1	200	213	yes	no	2;3	1.6359e-25	233.28	By MS/MS	By MS/MS	By MS/MS	By MS/MS	By MS/MS	By MS/MS	By MS/MS	By MS/MS
ACSELALLSVSDK	________________	ALLSVSDKSGLLDFAK	M	A	C	D	K	S	2	0	0	1	1	0	1	0	0	0	3	1	0	0	0	3	0	0	0	1	0	13	0	1391.7	NP_001133622.1;ACI33591.1;ACN10681.1	NP_001133622.1	2	14	no	no	2	2.2333e-05	142.39	By MS/MS	By MS/MS	By MS/MS	By MS/MS	By MS/MS	By MS/MS	By MS/MS	By MS/MS
ACTFHSCQQK	DSTSDLEKACTFHSCQ	TFHSCQQKE_______	K	A	C	Q	K	E	1	0	0	0	2	2	0	0	1	0	0	1	0	1	0	1	1	0	0	0	0	10	0	1265.53	ACI33444.1;P80426.1;NP_001117127.1;AAA18838.1;P80429.1	ACI33444.1	680	689	yes	no	2	0.00091978	109.83	By matching	By matching	By MS/MS	By matching	By MS/MS	By matching	By matching	By matching
ACVLNLEQR	VPWLEEHRACVLNLEQ	CVLNLEQRASPRMFAT	R	A	C	Q	R	A	1	1	1	0	1	1	1	0	0	0	2	0	0	0	0	0	0	0	0	1	0	9	0	1101.56	NP_001134940.1;ACI69582.1	NP_001134940.1	84	92	yes	no	2	0.00026259	152.11	By MS/MS	By MS/MS	By MS/MS	By MS/MS	By MS/MS	By MS/MS	By matching	By matching
ADAETSTNMVK	GSMAFGERADAETSTN	ETSTNMVKAFLERGHN	R	A	D	V	K	A	2	0	1	1	0	0	1	0	0	0	0	1	1	0	0	1	2	0	0	1	0	11	0	1165.53	NP_001133222.1;ACI66369.1;ACH85262.1	NP_001133222.1	57	67	yes	no	2	5.3969e-06	164.48	By MS/MS	By MS/MS	By matching	By MS/MS	By MS/MS	By MS/MS	By MS/MS	By MS/MS
ADDLGKGDNEESR	RTMVIHEKADDLGKGD	KGDNEESRKTGNAGSR	K	A	D	S	R	K	1	1	1	3	0	0	2	2	0	0	1	1	0	0	0	1	0	0	0	0	0	13	1	1404.61	NP_001117059.1;ACM09773.1;ACM09728.1;ACM09588.1;ACM09311.1;ACM09095.1;ACM08982.1;ACM08805.1;ACM08671.1;ACM08642.1;ACM08615.1;ACM08531.1;ACM08480.1;ACH70820.1;AAW59361.1;ACM08289.1;ACM08323.1	NP_001117059.1	124	136	yes	no	2;3	1.9135e-06	158.31	By matching	By matching	By MS/MS	By matching	By matching	By matching	By matching	By matching
ADEKPKEGVK	________________	EKPKEGVKTENNDHIN	M	A	D	V	K	T	1	0	0	1	0	0	2	1	0	0	0	3	0	0	1	0	0	0	0	1	0	10	2	1099.59	ACI69690.1;ACN12465.1;ACN10115.1;ACI70075.1;ACI69009.1;ACI68593.1;ACI67520.1;ACI67153.1;ACI66384.1;ADM16167.1;ACN12224.1;ACN09877.1;ACI69677.1;ACI69107.1;ACI66386.1;ACI66155.1;ACI67144.1;ACI68215.1	ACI69690.1	2	11	no	no		1	NaN	By matching	By matching	By matching	By matching	By matching	By matching	By matching	By matching
ADENPLSEQSVAQIMQSAK	VIQKVNYRADENPLSE	AQIMQSAKEQIKWSIL	R	A	D	A	K	E	3	0	1	1	0	3	2	0	0	1	1	1	1	0	1	3	0	0	0	1	0	19	0	2044.97	ACM09692.1;ACM09357.1	ACM09692.1	151	169	yes	no	2	0.023158	76.301	By matching	By matching	By matching	By matching	By matching	By MS/MS	By matching	By matching
ADGFADALHR	SVAQSGTKADGFADAL	GFADALHRARQIAAKM	K	A	D	H	R	A	3	1	0	2	0	0	0	1	1	0	1	0	0	1	0	0	0	0	0	0	0	10	0	1071.51	NP_001133499.1;ACI33355.1	NP_001133499.1	18	27	yes	no	2	0.00051497	125.68	By MS/MS	By MS/MS	By MS/MS	By MS/MS	By MS/MS	By MS/MS	By MS/MS	By MS/MS
ADGLGAAELLEAILK	TCGPIEIRADGLGAAE	ELLEAILKLLPLDTYV	R	A	D	L	K	L	4	0	0	1	0	0	2	2	0	1	4	1	0	0	0	0	0	0	0	0	0	15	0	1482.83	NP_001158739.1;ACN12357.1;ACN10010.1	NP_001158739.1	50	64	yes	no	2	1.6737e-18	209.79	By MS/MS	By MS/MS	By MS/MS	By MS/MS	By MS/MS	By MS/MS	By MS/MS	By MS/MS
ADGYEPPIQETV	DTGAKVDRADGYEPPI	EPPIQETV________	R	A	D	T	V	-	1	0	0	1	0	1	2	1	0	1	0	0	0	0	2	0	1	0	1	1	0	12	0	1317.61	NP_001134789.1;B5DGL6.1;ADM16028.1;ACN12266.1;ACN09919.1;ACI69899.1;ACI68885.1;ACI67043.1;ACI66415.1;ACH70890.1	NP_001134789.1	255	266	yes	no	2	0.00011648	117.79	By MS/MS	By MS/MS	By MS/MS	By MS/MS	By matching	By MS/MS	By MS/MS	By MS/MS
ADHQPLTEASYVNIPTIAMCNTDSPLR	LLIVTDPRADHQPLTE	CNTDSPLRYVDIAIPC	R	A	D	L	R	Y	3	1	2	2	1	1	1	0	1	2	2	0	1	0	3	2	3	0	1	1	0	27	0	3013.43	NP_001134397.1;B5DGB6.1;ACI70158.1;ACI68951.1;ACI67366.1;ACH70790.1;ADM15997.1;ACN12502.1;ACN10151.1;ACI68848.1;ACN10574.1	NP_001134397.1	129	155	yes	no	3	4.981e-15	153.34	By MS/MS	By MS/MS	By MS/MS	By MS/MS	By MS/MS	By MS/MS	By MS/MS	By MS/MS
ADIDAWELR	RWVTYFNKADIDAWEL	DIDAWELRKGMNTLIG	K	A	D	L	R	K	2	1	0	2	0	0	1	0	0	1	1	0	0	0	0	0	0	1	0	0	0	9	0	1087.53	ACM09161.1;ACI68857.1;ADM15873.1;ACI69717.1	ACM09161.1	55	63	yes	no	2	6.5888e-07	137.98	By MS/MS	By matching	By matching	By MS/MS	By matching	By matching	By MS/MS	By MS/MS
ADIFNIMK	PQPHGVVRADIFNIMK	ADIFNIMKEAVDQTLD	R	A	D	M	K	E	1	0	1	1	0	0	0	0	0	2	0	1	1	1	0	0	0	0	0	0	0	8	0	950.49	ACM08542.1;NP_001133102.1;ACI69735.1;ACH70694.1	NP_001133102.1	186	193	no	no	2	0.0049218	87.476	By MS/MS	By matching	By matching	By matching	By matching	By matching	By matching	By matching
ADLEMQIESLTEELAYLK	LDELTLTKADLEMQIE	TEELAYLKKNHEEEMK	K	A	D	L	K	K	2	0	0	1	0	1	4	0	0	1	4	1	1	0	0	1	1	0	1	0	0	18	0	2095.04	CON__P13645	CON__P13645	267	284	yes	yes	2	3.0693e-08	161.75	By MS/MS	By matching	By matching	By matching	By matching	By matching	By matching	By matching
ADLINNLGTIAK	DTGIGMTKADLINNLG	NNLGTIAKSGTKAFME	K	A	D	A	K	S	2	0	2	1	0	0	0	1	0	2	2	1	0	0	0	0	1	0	0	0	0	12	0	1241.7	NP_001117004.1;AGT57169.1;AAD30275.1;ACH70738.1;AGT57166.1;AGT57168.1;CAJ90902.1;AGT57167.1;AGT57170.1;NP_001139945.1;ACM09821.1;ACM08820.1	NP_001117004.1	95	106	no	no	2	7.7711e-07	161.25	By MS/MS	By MS/MS	By MS/MS	By MS/MS	By MS/MS	By MS/MS	By MS/MS	By MS/MS
ADLLIALSDVEGLYDSPPGTDDAK	ARLAVEMKADLLIALS	PPGTDDAKLIDIFYPG	K	A	D	A	K	L	3	0	0	5	0	0	1	2	0	1	4	1	0	0	2	2	1	0	1	1	0	24	0	2474.21	NP_001167302.1;ACN11321.1	NP_001167302.1	242	265	yes	no	2	1.8099e-11	145.73	By MS/MS	By matching	By matching	By MS/MS	By MS/MS	By MS/MS	By matching	By matching
ADMVIEAVFEDINIK	LDYSGFEKADMVIEAV	VFEDINIKHRVIKEVE	K	A	D	I	K	H	2	0	1	2	0	0	2	0	0	3	0	1	1	1	0	0	0	0	0	2	0	15	0	1705.86	ACN58629.1	ACN58629.1	436	450	yes	yes	2;3	3.4027e-06	148.7	By matching	By matching	By matching	By MS/MS	By matching	By matching	By matching	By matching
ADNPGMGIGDIAK	AEHRGRIKADNPGMGI	MGIGDIAKQLGLLWGK	K	A	D	A	K	Q	2	0	1	2	0	0	0	3	0	2	0	1	1	0	1	0	0	0	0	0	0	13	0	1257.6	NP_001133170.1;ACN12594.1;ACN12243.1;ACN10239.1;ACN09896.1;ACM09096.1;ACM08578.1;ACH70874.1;ACN12487.1;ACN12197.1;ACN10136.1;ACN09850.1;ACM09464.1	NP_001133170.1	117	129	yes	no	2	1.3019e-10	180.85	By MS/MS	By MS/MS	By MS/MS	By matching	By matching	By MS/MS	By MS/MS	By MS/MS
ADNWWLR	CTRLAGDKADNWWLRH	KADNWWLRHHPRVLGM	K	A	D	L	R	H	1	1	1	1	0	0	0	0	0	0	1	0	0	0	0	0	0	2	0	0	0	7	0	959.461	NP_001133622.1;ACI33591.1;ACN10681.1	NP_001133622.1	461	467	no	no	2	3.5902e-05	161.9	By MS/MS	By MS/MS	By MS/MS	By MS/MS	By MS/MS	By MS/MS	By MS/MS	By MS/MS
ADQLTEEQIAEFK	________________	EEQIAEFKEAFSLFDK	M	A	D	F	K	E	2	0	0	1	0	2	3	0	0	1	1	1	0	1	0	0	1	0	0	0	0	13	0	1520.74	NP_001133186.1;NP_001133185.1;AGH92603.1;AGH92538.1;ADM16085.1;ADM16072.1;ACN12735.1;ACN12704.1;ACN12698.1;ACN12518.1;ACN11206.1;ACN10373.1;ACN10344.1;ACN10338.1;ACN10165.1;ACM09550.1;ACM09448.1;ACM09085.1;ACM08633.1;ACM08610.1;ACM08237.1;ACI69721.1;ACI68583.1;ACI68402.1;ACI66692.1;ACI66075.1;ACI33806.1;ACI33505.1;ACH70912.1;ACH70911.1;ACH70910.1;ADM16205.1;ACI68592.1;ACM09117.1;ACI66085.1	NP_001133186.1	2	14	yes	no	2	1.6927e-14	201.3	By MS/MS	By MS/MS	By MS/MS	By MS/MS	By matching	By MS/MS	By MS/MS	By MS/MS
ADQLTEEQIAEFKEAFSLFDKDGDGTITTK	________________	GDGTITTKELGTVMRS	M	A	D	T	K	E	3	0	0	4	0	2	4	2	0	2	2	3	0	3	0	1	4	0	0	0	0	30	2	3346.61	NP_001133186.1;NP_001133185.1;AGH92603.1;AGH92538.1;ADM16085.1;ADM16072.1;ACN12735.1;ACN12704.1;ACN12698.1;ACN12518.1;ACN11206.1;ACN10373.1;ACN10344.1;ACN10338.1;ACN10165.1;ACM09550.1;ACM09448.1;ACM09085.1;ACM08633.1;ACM08610.1;ACM08237.1;ACI69721.1;ACI68583.1;ACI68402.1;ACI66692.1;ACI66075.1;ACI33806.1;ACI33505.1;ACH70912.1;ACH70911.1;ACH70910.1;ADM16205.1;ACI68592.1;ACM09117.1;ACI66085.1	NP_001133186.1	2	31	yes	no	3	2.0782e-17	133.58	By matching	By MS/MS	By MS/MS	By MS/MS	By MS/MS	By MS/MS	By MS/MS	By matching
ADRDESSPYAAMLAAQDVAQR	VTGGMKVKADRDESSP	AAQDVAQRCKELGITA	K	A	D	Q	R	C	6	2	0	3	0	2	1	0	0	0	1	0	1	0	1	2	0	0	1	1	0	21	1	2264.05	NP_001134254.1;NP_001133208.1;ACN12165.1;ACN09818.1;ACI66811.1;ACH70996.1;ACH70995.1;ACN12313.1;ACN09966.1	NP_001134254.1	64	84	yes	no	2;3	7.9224e-08	131.54	By MS/MS	By MS/MS	By MS/MS	By MS/MS	By MS/MS	By MS/MS	By MS/MS	By matching
ADTCGQVLLGSGLTVLSHPLMYIK	________________	SHPLMYIKVLIQVGHE	M	A	D	I	K	V	1	0	0	1	1	1	0	3	1	1	5	1	1	0	1	2	2	0	1	2	0	24	0	2572.34	ACM09479.1;ACI66637.1;ACI33727.1	ACM09479.1	2	25	yes	no	3	0.0078173	45.424	By matching	By matching	By matching	By matching	By matching	By matching	By matching	By matching
ADTDLDFTTGESGASATIPMQCSALR	________________	PMQCSALRKNGYVVLK	M	A	D	L	R	K	4	1	0	3	1	1	1	2	0	1	2	0	1	1	1	3	4	0	0	0	0	26	0	2714.22	ACM08851.1	ACM08851.1	2	27	yes	yes	3	5.1132e-08	108.28	By matching	By matching	By matching	By MS/MS	By matching	By matching	By matching	By matching
ADTDQVMGFQQTFLLK	SMVMGQLKADTDQVMG	FQQTFLLKNVDNKWIC	K	A	D	L	K	N	1	0	0	2	0	3	0	1	0	0	2	1	1	2	0	0	2	0	0	1	0	16	0	1840.9	ACN12528.1;ACN10175.1;ACI70045.1;ACI68954.1;ACI68533.1;ACI66665.1;ACI66047.1	ACN12528.1	91	106	yes	no	2	3.492e-13	189.52	By matching	By matching	By matching	By matching	By MS/MS	By matching	By matching	By matching
ADTGLVETLLR	________________	GLVETLLRRVEKVDGG	M	A	D	L	R	R	1	1	0	1	0	0	1	1	0	0	3	0	0	0	0	0	2	0	0	1	0	11	0	1186.66	NP_001133621.1;ACI33588.1	NP_001133621.1	2	12	yes	no	2	0.00013287	140.14	By MS/MS	By MS/MS	By MS/MS	By MS/MS	By MS/MS	By MS/MS	By matching	By matching
ADVIMTMDSADFTK	GSGEPPVKADVIMTMD	MDSADFTKMFAGKLKP	K	A	D	T	K	M	2	0	0	3	0	0	0	0	0	1	0	1	2	1	0	1	2	0	0	1	0	14	0	1543.69	ACN12769.1;ACN10404.1;NP_001135155.1;ACH70700.1	ACN12769.1	358	371	no	no	2	3.5252e-25	223.03	By MS/MS	By MS/MS	By MS/MS	By MS/MS	By MS/MS	By MS/MS	By MS/MS	By MS/MS
ADVLGAEALGR	FWGKISGKADVLGAEA	LGAEALGRMLTAYPQT	K	A	D	G	R	M	3	1	0	1	0	0	1	2	0	0	2	0	0	0	0	0	0	0	0	1	0	11	0	1070.57	ACN12305.1;ACN09958.1;ACN12747.1;ACN11070.1;ACN10385.1	ACN12747.1	22	32	no	no	2	4.9511e-11	199.19	By MS/MS	By MS/MS	By MS/MS	By MS/MS	By MS/MS	By MS/MS	By MS/MS	By MS/MS
ADVVDSLVR	VPQDEDARADVVDSLV	DVVDSLVRDIQNTQCL	R	A	D	V	R	D	1	1	0	2	0	0	0	0	0	0	1	0	0	0	0	1	0	0	0	3	0	9	0	972.524	ACN60284.1	ACN60284.1	753	761	yes	yes	2	0.00044321	145.46	By MS/MS	By MS/MS	By MS/MS	By MS/MS	By MS/MS	By MS/MS	By MS/MS	By MS/MS
ADVVGAEALGR	FWGKIKGKADVVGAEA	VGAEALGRMLTAYPQT	K	A	D	G	R	M	3	1	0	1	0	0	1	2	0	0	1	0	0	0	0	0	0	0	0	2	0	11	0	1056.56	ACN12658.1;ACN12391.1;ACN10298.1;ACN10044.1;ACI69100.1;CAA65949.1;CAA65955.1;CAA65952.1;ACN12414.1;ACN11251.1;ACN10067.1;ACN12527.1;ACN10174.1;P11251.2;NP_001117134.1;CAA32596.1	P11251.2	22	32	no	no	2	1.017e-07	181.4	By MS/MS	By MS/MS	By MS/MS	By matching	By MS/MS	By MS/MS	By MS/MS	By MS/MS
ADWTDAEK	________________	ADWTDAEKSTISAVWG	M	A	D	E	K	S	2	0	0	2	0	0	1	0	0	0	0	1	0	0	0	0	1	1	0	0	0	8	0	934.403	CAA65950.1;ACH70759.1	CAA65950.1	2	9	no	no	2	0.057452	54.722	By matching	By matching	By MS/MS	By matching	By matching	By matching	By matching	By matching
ADYDNYDDRDR	________________	DNYDDRDRAYGSFGGG	M	A	D	D	R	A	1	2	1	5	0	0	0	0	0	0	0	0	0	0	0	0	0	0	2	0	0	11	1	1416.55	NP_001133347.1;ACN10439.1;ACI33070.1	NP_001133347.1	2	12	yes	no	2	0.045622	59.265	By matching	By matching	By MS/MS	By matching	By matching	By matching	By matching	By matching
AEACETVADTLFNTVWTLGCR	KSLGFMSKAEACETVA	TVWTLGCRPYMNSQRE	K	A	E	C	R	P	3	1	1	1	2	0	2	1	0	0	2	0	0	1	0	0	4	1	0	2	0	21	0	2413.1	ACI66371.1	ACI66371.1	169	189	yes	yes	3	8.7364e-12	163.44	By MS/MS	By MS/MS	By MS/MS	By MS/MS	By MS/MS	By MS/MS	By MS/MS	By MS/MS
AEAETWYK	EDIANKSRAEAETWYK	AEAETWYKSKYEEMQT	R	A	E	Y	K	S	2	0	0	0	0	0	2	0	0	0	0	1	0	0	0	0	1	1	1	0	0	8	0	996.455	NP_001133687.1;ACN11271.1;ACI33701.1	NP_001133687.1	310	317	yes	no	2	0.00010048	162.25	By MS/MS	By MS/MS	By MS/MS	By matching	By MS/MS	By matching	By MS/MS	By MS/MS
AEAFAGTWNLK	________________	FAGTWNLKESKNFDEY	M	A	E	L	K	E	3	0	1	0	0	0	1	1	0	0	1	1	0	1	0	0	1	1	0	0	0	11	0	1206.6	ACI69906.1;ACI66303.1;ACI69211.1;NP_001117050.1;AAR91708.1	ACI69906.1	2	12	yes	no	2	1.7972e-11	215.08	By MS/MS	By MS/MS	By MS/MS	By MS/MS	By MS/MS	By MS/MS	By MS/MS	By MS/MS
AEAGAGSATEFQFR	APPGGDKKAEAGAGSA	SATEFQFRGGFGRGRG	K	A	E	F	R	G	4	1	0	0	0	1	2	2	0	0	0	0	0	2	0	1	1	0	0	0	0	14	0	1440.66	ACI69812.1;ACI67887.1;ACI67159.1;ACI66094.1;ACH70846.1;ACN12403.1;ACN10056.1;ACI68053.1	ACI69812.1	144	157	yes	no	2	1.6069e-18	214.61	By MS/MS	By MS/MS	By MS/MS	By MS/MS	By MS/MS	By MS/MS	By MS/MS	By MS/MS
AECAAALFAGMDAGWLKPAVGK	PYATVEEKAECAAALF	WLKPAVGKQYTLDMAY	K	A	E	G	K	Q	7	0	0	1	1	0	1	3	0	0	2	2	1	1	1	0	0	1	0	1	0	22	1	2233.1	NP_001134320.1;ACI67047.1	NP_001134320.1	281	302	yes	no	3	3.6677e-07	115.53	By matching	By matching	By MS/MS	By MS/MS	By matching	By MS/MS	By MS/MS	By MS/MS
AEDALEALIHGVDGILVSNHGAR	VVVKGVLRAEDALEAL	LVSNHGARQLDGVPAT	R	A	E	A	R	Q	4	1	1	2	0	0	2	3	2	2	3	0	0	0	0	1	0	0	0	2	0	23	0	2356.21	ACN12757.1;ACN10394.1;NP_001135240.1;ACI33762.1	ACN12757.1	241	263	yes	no	3;4	1.1518e-36	240.21	By MS/MS	By MS/MS	By matching	By MS/MS	By MS/MS	By MS/MS	By MS/MS	By MS/MS
AEDDLTPEQLAAIAAENDVGETVNYKPPAQK	________________	NYKPPAQKTLQEIQEL	M	A	E	Q	K	T	6	0	2	3	0	2	4	1	0	1	2	2	0	0	3	0	2	0	1	2	0	31	1	3296.6	ACI33476.1	ACI33476.1	2	32	yes	yes	3	4.4608e-08	93.229	By matching	By MS/MS	By MS/MS	By matching	By MS/MS	By matching	By matching	By matching
AEEGIAAGGVMDVNTALPEVLK	________________	TALPEVLKTALIHDGL	M	A	E	L	K	T	4	0	1	1	0	0	3	3	0	1	2	1	1	0	1	0	1	0	0	3	0	22	0	2183.11	ADM16249.1;ADM16007.1;ACN12369.1;ACN12195.1;ACN10022.1;ACN09848.1;ACI68255.1;ACI67162.1;ACI66971.1;ACH70842.1;ACN11199.1	ADM16249.1	2	23	yes	no	2;3	1.2912e-26	201.95	By MS/MS	By MS/MS	By MS/MS	By MS/MS	By MS/MS	By MS/MS	By MS/MS	By MS/MS
AEGEPQVQFK	________________	GEPQVQFKLVLVGDGG	M	A	E	F	K	L	1	0	0	0	0	2	2	1	0	0	0	1	0	1	1	0	0	0	0	1	0	10	0	1131.56	Q9YGC0.1;NP_001117103.1;CAA10040.1;CAA10039.1;ACM08489.1;CAA10191.1	Q9YGC0.1	2	11	yes	no	2	0.029732	67.214	By matching	By matching	By matching	By matching	By MS/MS	By matching	By matching	By matching
AEGSDVANAVLDGADCVMLSGETAK	VAHPRPTRAEGSDVAN	MLSGETAKGLFPVESV	R	A	E	A	K	G	5	0	1	3	1	0	2	3	0	0	2	1	1	0	0	2	1	0	0	3	0	25	0	2479.12	ACN11437.1	ACN11437.1	339	363	yes	yes	2;3	7.4939e-87	310.47	By MS/MS	By MS/MS	By MS/MS	By MS/MS	By MS/MS	By MS/MS	By MS/MS	By MS/MS
AEGSVSLFVAQNPDR	HSQYQWSRAEGSVSLF	FVAQNPDRKRA_____	R	A	E	D	R	K	2	1	1	1	0	1	1	1	0	0	1	0	0	1	1	2	0	0	0	2	0	15	0	1588.78	ADM16040.1;ACI69087.1;NP_001134951.1;ADM15971.1;ACI69619.1	ADM16040.1	270	284	yes	no	2	1.3328e-13	196.97	By MS/MS	By MS/MS	By MS/MS	By MS/MS	By MS/MS	By MS/MS	By MS/MS	By MS/MS
AEGVWDELLDGFQPDIVIK	LEQRVDLKAEGVWDEL	FQPDIVIKDWYEESQL	K	A	E	I	K	D	1	0	0	3	0	1	2	2	0	2	2	1	0	1	1	0	0	1	0	2	0	19	0	2143.08	NP_001159729.1;ACL37479.2	NP_001159729.1	116	134	yes	no	2	1.363e-16	195.77	By matching	By matching	By matching	By MS/MS	By MS/MS	By MS/MS	By MS/MS	By matching
AEIAAQPPVEGSYAAR	ENLMETMRAEIAAQPP	VEGSYAARRGDYCIAN	R	A	E	A	R	R	5	1	0	0	0	1	2	1	0	1	0	0	0	0	2	1	0	0	1	1	0	16	0	1628.82	ACN60284.1	ACN60284.1	657	672	yes	yes	2	5.3089e-06	142.4	By MS/MS	By MS/MS	By MS/MS	By MS/MS	By MS/MS	By MS/MS	By MS/MS	By MS/MS
AEIDMLDIK	LIRIMVARAEIDMLDI	EIDMLDIKTEFSKAYG	R	A	E	I	K	T	1	0	0	2	0	0	1	0	0	2	1	1	1	0	0	0	0	0	0	0	0	9	0	1046.53	ACI69256.1	ACI69256.1	278	286	yes	yes	2	0.0001758	157.66	By MS/MS	By MS/MS	By MS/MS	By MS/MS	By MS/MS	By MS/MS	By MS/MS	By MS/MS
AELASLVQR	________________	ELASLVQRLEVAVGRL	M	A	E	Q	R	L	2	1	0	0	0	1	1	0	0	0	2	0	0	0	0	1	0	0	0	1	0	9	0	985.556	NP_001133556.1;ACI33472.1	NP_001133556.1	2	10	yes	no	2	0.001212	132.01	By MS/MS	By MS/MS	By MS/MS	By MS/MS	By MS/MS	By MS/MS	By MS/MS	By MS/MS
AELATEEYLPVTPILEGFVILR	VLLAHGERAELATEEY	LEGFVILRKNPNYDA_	R	A	E	L	R	K	2	1	0	0	0	0	4	1	0	2	4	0	0	1	2	0	2	0	1	2	0	22	0	2472.35	NP_001158789.1;ACN10471.1	NP_001158789.1	870	891	yes	no	2;3	2.5178e-07	121.82	By MS/MS	By MS/MS	By MS/MS	By MS/MS	By MS/MS	By MS/MS	By MS/MS	By MS/MS
AELNEFLTR	FVADGIFKAELNEFLT	ELNEFLTRELAEDGYS	K	A	E	T	R	E	1	1	1	0	0	0	2	0	0	0	2	0	0	1	0	0	1	0	0	0	0	9	0	1091.56	ACN10438.1;ACI67277.1;ACH71009.1;ACI70043.1;ACH71008.1;ACI67536.1;ACN12239.1;ACN09892.1;ACI67079.1;ACN12447.1;ACN10099.1;ACI67795.1	ACN10438.1	19	27	no	no	2	3.8001e-06	187.99	By MS/MS	By MS/MS	By MS/MS	By MS/MS	By MS/MS	By MS/MS	By matching	By MS/MS
AELPAADQCEDFK	IPRDLSLKAELPAADQ	ADQCEDFKKDHKAFVG	K	A	E	F	K	K	3	0	0	2	1	1	2	0	0	0	1	1	0	1	1	0	0	0	0	0	0	13	0	1492.65	P21848.1;NP_001117137.1;CAA36643.1;Q03156.1;NP_001117164.1;CAA43187.1	Q03156.1	134	146	no	no	2	2.8422e-07	157.09	By MS/MS	By MS/MS	By MS/MS	By MS/MS	By MS/MS	By MS/MS	By MS/MS	By MS/MS
AELPAADQCEDFKK	IPRDLSLKAELPAADQ	DQCEDFKKDHKAFVGR	K	A	E	K	K	D	3	0	0	2	1	1	2	0	0	0	1	2	0	1	1	0	0	0	0	0	0	14	1	1620.75	P21848.1;NP_001117137.1;CAA36643.1;Q03156.1;NP_001117164.1;CAA43187.1	Q03156.1	134	147	no	no	2;3	2.5478e-06	164.92	By matching	By MS/MS	By MS/MS	By MS/MS	By MS/MS	By MS/MS	By matching	By MS/MS
AELSIQTAPYESVFTELQAVCASLVPK	LQLDTPSKAELSIQTA	VCASLVPKEKVWISDK	K	A	E	P	K	E	4	0	0	0	1	2	3	0	0	1	3	1	0	1	2	3	2	0	1	3	0	27	0	2950.5	NP_001135239.1;ACI33755.1	NP_001135239.1	265	291	yes	no	3	0.0034072	49.765	By MS/MS	By MS/MS	By MS/MS	By MS/MS	By matching	By MS/MS	By MS/MS	By MS/MS
AEMANAIDQYVSGTIGEGPDLAVWK	RFRSGVKRAEMANAID	GPDLAVWKAMYEEVPE	R	A	E	W	K	A	4	0	1	2	0	1	2	3	0	2	1	1	1	0	1	1	1	1	1	2	0	25	0	2634.26	NP_001133622.1;ACI33591.1;ACN10681.1	NP_001133622.1	484	508	no	no	2;3	1.5429e-36	229.23	By MS/MS	By MS/MS	By MS/MS	By MS/MS	By MS/MS	By MS/MS	By MS/MS	By MS/MS
AEMEDLVSSK	DRANKLLRAEMEDLVS	MEDLVSSKDDVGKSVH	R	A	E	S	K	D	1	0	0	1	0	0	2	0	0	0	1	1	1	0	0	2	0	0	0	1	0	10	0	1107.51	ACN60211.1	ACN60211.1	62	71	yes	yes	2	0.0003751	131.42	By MS/MS	By MS/MS	By MS/MS	By MS/MS	By MS/MS	By MS/MS	By MS/MS	By MS/MS
AENFFILR	FMRFMMMRAENFFILR	AENFFILRRKPVEGYD	R	A	E	L	R	R	1	1	1	0	0	0	1	0	0	1	1	0	0	2	0	0	0	0	0	0	0	8	0	1008.54	ACI66838.1;ACI70002.1;ACI69941.1;ACI68682.1;ACI69675.1;ACI69161.1;ACI68966.1;ACI67613.1	ACI66838.1	98	105	no	no	2	0.00037901	140.14	By MS/MS	By matching	By matching	By MS/MS	By MS/MS	By MS/MS	By MS/MS	By MS/MS
AEPPQCTSLAWSADGQTLFAGYTDNLIR	EVISTNSKAEPPQCTS	GYTDNLIRVWQVTIGT	K	A	E	I	R	V	4	1	1	2	1	2	1	2	0	1	3	0	0	1	2	2	3	1	1	0	0	28	0	3081.45	ACN11311.1;ACN11018.1;ACI68732.1;ACI67449.1;ACH70647.1	ACN11311.1	281	308	yes	no	3	3.1167e-06	89.979	By MS/MS	By matching	By matching	By MS/MS	By MS/MS	By MS/MS	By matching	By matching
AEQDLLTSLSSNLEDALGSTAK	ARLAEQDKAEQDLLTS	DALGSTAKVTLQAIGA	K	A	E	A	K	V	3	0	1	2	0	1	2	1	0	0	5	1	0	0	0	4	2	0	0	0	0	22	0	2262.12	ACI33218.1	ACI33218.1	179	200	yes	yes	2	5.8981e-11	143.48	By MS/MS	By matching	By matching	By matching	By matching	By matching	By matching	By matching
AEQTTLDSLLEMGFDR	________________	LLEMGFDRNRAEKAVA	M	A	E	D	R	N	1	1	0	2	0	1	2	1	0	0	3	0	1	1	0	1	2	0	0	0	0	16	0	1824.86	NP_001158761.1;ACN12706.1;ACN10346.1	NP_001158761.1	2	17	yes	no	2	2.9108e-06	149.86	By MS/MS	By MS/MS	By MS/MS	By MS/MS	By MS/MS	By MS/MS	By MS/MS	By MS/MS
AETGSESFTMGMNHLSDK	RVMEHNKRAETGSESF	GMNHLSDKTTAEVTGR	R	A	E	D	K	T	1	0	1	1	0	0	2	2	1	0	1	1	2	1	0	3	2	0	0	0	0	18	0	1940.82	NP_001134251.1;CAD80246.1;ACI66799.1	NP_001134251.1	235	252	yes	no	3	0.004693	68.576	By MS/MS	By MS/MS	By MS/MS	By MS/MS	By MS/MS	By MS/MS	By matching	By MS/MS
AETLGDALPLIITR	IIVAPGLKAETLGDAL	ALPLIITRLCEPKEAS	K	A	E	T	R	L	2	1	0	1	0	0	1	1	0	2	3	0	0	0	1	0	2	0	0	0	0	14	0	1481.85	ACI33292.1	ACI33292.1	221	234	yes	yes	2	3.882e-12	177.93	By MS/MS	By MS/MS	By MS/MS	By MS/MS	By MS/MS	By MS/MS	By MS/MS	By MS/MS
AEVAPAPAAAAPAK	________________	PAAAAPAKAPKKKAAA	M	A	E	A	K	A	8	0	0	0	0	0	1	0	0	0	0	1	0	0	3	0	0	0	0	1	0	14	0	1233.67	P84408.3;CAI46350.1	P84408.3	2	15	yes	no	2	0.00011571	124.48	By MS/MS	By MS/MS	By MS/MS	By MS/MS	By MS/MS	By MS/MS	By MS/MS	By MS/MS
AEVISDKETFK	SQFGAIEKAEVISDKE	ISDKETFKKRGFGFVY	K	A	E	F	K	K	1	0	0	1	0	0	2	0	0	1	0	2	0	1	0	1	1	0	0	1	0	11	1	1265.65	ACI32918.1	ACI32918.1	126	136	yes	yes	2	1.4474e-10	211.63	By MS/MS	By MS/MS	By MS/MS	By MS/MS	By MS/MS	By MS/MS	By MS/MS	By MS/MS
AEVMKDVEELR	ADATATVRAEVMKDVE	MKDVEELRTQLEPKRA	R	A	E	L	R	T	1	1	0	1	0	0	3	0	0	0	1	1	1	0	0	0	0	0	0	2	0	11	1	1317.66	ACI69572.1;NP_001134612.1;ACI68193.1	ACI69572.1	84	94	no	no	2	3.7262e-10	197.07	By MS/MS	By MS/MS	By MS/MS	By MS/MS	By MS/MS	By MS/MS	By MS/MS	By MS/MS
AEVQINIDANEAIVK	SASDEAARAEVQINID	DANEAIVKALE_____	R	A	E	V	K	A	3	0	2	1	0	1	2	0	0	3	0	1	0	0	0	0	0	0	0	2	0	15	0	1625.86	ACI69889.1;ACI69016.1	ACI69889.1	143	157	no	no	2	3.3142e-13	195.23	By matching	By MS/MS	By MS/MS	By MS/MS	By matching	By matching	By MS/MS	By matching
AEYIHVVR	________________	AEYIHVVRRALGQLGG	M	A	E	V	R	R	1	1	0	0	0	0	1	0	1	1	0	0	0	0	0	0	0	0	1	2	0	8	0	985.535	ACI68756.1;NP_001134706.1;AGH92585.1;ACM09720.1;ACI68542.1	ACI68756.1	2	9	yes	no	2	0.00098675	127.56	By matching	By MS/MS	By MS/MS	By matching	By matching	By MS/MS	By MS/MS	By MS/MS
AEYLMALESSEGLLDAMGSQALAR	TRAKTQLKAEYLMALE	MGSQALARGTYHSPEA	K	A	E	A	R	G	5	1	0	1	0	1	3	2	0	0	5	0	2	0	0	3	0	0	1	0	0	24	0	2525.21	ACN12439.1;ACN10092.1;ACH70840.1	ACN12439.1	378	401	no	no	2;3	1.7594e-07	113.71	By matching	By MS/MS	By MS/MS	By MS/MS	By MS/MS	By MS/MS	By MS/MS	By MS/MS
AFADALEVIPMALAENSGLNSIQTMTEVR	SLEQYAMRAFADALEV	IQTMTEVRARQVTENN	R	A	F	V	R	A	5	1	2	1	0	1	3	1	0	2	3	0	2	1	1	2	2	0	0	2	0	29	0	3090.54	NP_001167310.1;ACN11333.1	NP_001167310.1	450	478	yes	no	3	0.0033459	45.328	By matching	By matching	By matching	By MS/MS	By MS/MS	By matching	By matching	By matching
AFAFVTFADDQVASALCGEDLIIK	VFIPKPFRAFAFVTFA	CGEDLIIKGVSVHISN	R	A	F	I	K	G	5	0	0	3	1	1	1	1	0	2	2	1	0	3	0	1	1	0	0	2	0	24	0	2600.28	ACI33676.1	ACI33676.1	229	252	yes	yes	3	0.0070278	48.146	By matching	By matching	By matching	By matching	By matching	By MS/MS	By matching	By matching
AFDNALGVNVPR	TAVGAAIKAFDNALGV	ALGVNVPRSRFLPVKT	K	A	F	P	R	S	2	1	2	1	0	0	0	1	0	0	1	0	0	1	1	0	0	0	0	2	0	12	0	1271.66	NP_001133758.1;ACI33847.1;ACH70772.1	NP_001133758.1	362	373	yes	no	2	6.6739e-05	127.52	By MS/MS	By MS/MS	By MS/MS	By MS/MS	By MS/MS	By MS/MS	By MS/MS	By MS/MS
AFEDEDIIHVEGNVDPVR	DGIFHMTRAFEDEDII	EGNVDPVRDIEIIHEE	R	A	F	V	R	D	1	1	1	3	0	0	3	1	1	2	0	0	0	1	1	0	0	0	0	3	0	18	0	2052.98	NP_001158828.1;ACN10563.1	NP_001158828.1	125	142	yes	no	3	0.00031362	96.773	By matching	By matching	By matching	By matching	By matching	By matching	By matching	By MS/MS
AFGVEVLGLDLSANMVDIAIER	GGNFYMAKAFGVEVLG	MVDIAIERAMEEKLPS	K	A	F	E	R	A	3	1	1	2	0	0	2	2	0	2	3	0	1	1	0	1	0	0	0	3	0	22	0	2331.21	NP_001167350.1;ACN11445.1	NP_001167350.1	306	327	yes	no	2;3	3.7551e-20	185.41	By MS/MS	By MS/MS	By MS/MS	By MS/MS	By MS/MS	By MS/MS	By MS/MS	By MS/MS
AFGYYGPLR	GNKTELERAFGYYGPL	FGYYGPLRSVWVARNP	R	A	F	L	R	S	1	1	0	0	0	0	0	2	0	0	1	0	0	1	1	0	0	0	2	0	0	9	0	1042.52	ADM16100.1;ACM09831.1;ACI67960.1;ACI34086.1	ADM16100.1	33	41	no	no	2	0.00047268	144.38	By matching	By MS/MS	By MS/MS	By MS/MS	By matching	By MS/MS	By matching	By MS/MS
AFLDSDAYK	MSARPKIKAFLDSDAY	FLDSDAYKKLPINGNG	K	A	F	Y	K	K	2	0	0	2	0	0	0	0	0	0	1	1	0	1	0	1	0	0	1	0	0	9	0	1028.48	ACI69603.1;ACI68362.1	ACI69603.1	190	198	yes	no	2	0.0011652	119.62	By MS/MS	By MS/MS	By MS/MS	By MS/MS	By MS/MS	By MS/MS	By MS/MS	By MS/MS
AFLGSDAYK	MSARPKIKAFLGSDAY	FLGSDAYKKLPINGNG	K	A	F	Y	K	K	2	0	0	1	0	0	0	1	0	0	1	1	0	1	0	1	0	0	1	0	0	9	0	970.476	ACN12309.1;ACN09962.1;ACI70112.1;ACI69773.1;ADM16185.1;ACI68586.1	ACN12309.1	190	198	yes	no	2	0.00059206	139.98	By MS/MS	By MS/MS	By MS/MS	By MS/MS	By MS/MS	By MS/MS	By MS/MS	By MS/MS
AFLIEEQK	CVRDRIKRAFLIEEQK	AFLIEEQKIVVKVLKA	R	A	F	Q	K	I	1	0	0	0	0	1	2	0	0	1	1	1	0	1	0	0	0	0	0	0	0	8	0	976.523	NP_001133164.1;ACN12523.1;ACN10170.1;ACH70849.1;ACN12395.1;ACN10048.1	NP_001133164.1	94	101	yes	no	2	0.00013601	156.75	By MS/MS	By MS/MS	By MS/MS	By MS/MS	By MS/MS	By MS/MS	By MS/MS	By MS/MS
AFLNAAEAVDDVPFGITSNDAVFSK	DVESEGAKAFLNAAEA	SNDAVFSKFEVSKDGV	K	A	F	S	K	F	5	0	2	3	0	0	1	1	0	1	1	1	0	3	1	2	1	0	0	3	0	25	0	2597.26	ACN60216.1	ACN60216.1	84	108	yes	yes	2;3	1.9984e-22	197.47	By MS/MS	By MS/MS	By MS/MS	By MS/MS	By MS/MS	By MS/MS	By MS/MS	By MS/MS
AFLPPVCNK	KWIAENEKAFLPPVCN	FLPPVCNKLMHFSQLN	K	A	F	N	K	L	1	0	1	0	1	0	0	0	0	0	1	1	0	1	2	0	0	0	0	1	0	9	0	1044.54	ADM16040.1;ACI69087.1;NP_001134951.1;ADM15971.1;ACI69619.1	ADM16040.1	20	28	yes	no	2	0.022411	65.252	By MS/MS	By MS/MS	By MS/MS	By MS/MS	By MS/MS	By MS/MS	By MS/MS	By MS/MS
AFLQHVLSQHQDLLAQIR	TKITKFEKAFLQHVLS	QDLLAQIRADGKISET	K	A	F	I	R	A	2	1	0	1	0	4	0	0	2	1	4	0	0	1	0	1	0	0	0	1	0	18	0	2116.15	ACN10935.1;ACI33076.1	ACN10935.1	510	527	yes	no	3	5.4874e-05	110.6	By matching	By matching	By matching	By matching	By matching	By MS/MS	By matching	By MS/MS
AFLTLAEDILR	KANISIEKAFLTLAED	TLAEDILRKTPVKEPN	K	A	F	L	R	K	2	1	0	1	0	0	1	0	0	1	3	0	0	1	0	0	1	0	0	0	0	11	0	1260.71	NP_001133793.1;ACM08424.1;ACI33910.1;ACI33022.1	NP_001133793.1	162	172	yes	no	2	8.9962e-08	183.33	By MS/MS	By matching	By matching	By matching	By MS/MS	By matching	By MS/MS	By MS/MS
AFNTSCPVSEFIPK	GLPWTLAKAFNTSCPV	PVSEFIPKERIPDLGN	K	A	F	P	K	E	1	0	1	0	1	0	1	0	0	1	0	1	0	2	2	2	1	0	0	1	0	14	0	1595.77	NP_001134417.1;ACI69832.1;ACI67430.1	NP_001134417.1	120	133	yes	no	2	9.8924e-06	141.85	By matching	By matching	By MS/MS	By matching	By matching	By matching	By matching	By MS/MS
AFQFVETHGEVCPASWTPDSPTIKPTPEGSK	DETLRLVRAFQFVETH	KPTPEGSKEYFEKVND	R	A	F	S	K	E	2	0	0	1	1	1	3	2	1	1	0	2	0	2	5	3	4	1	0	2	0	31	1	3399.61	ADM15936.1;ACI69604.1;ACI69558.1;ACI66477.1;ACH85347.1;ADM15885.1;ACI67209.1	ADM15936.1	212	242	no	no	3;4	7.3814e-24	164.39	By MS/MS	By MS/MS	By MS/MS	By MS/MS	By MS/MS	By MS/MS	By MS/MS	By MS/MS
AFSEYGDSVVNPK	EEAKMLVKAFSEYGDS	GDSVVNPKELLCNCVG	K	A	F	P	K	E	1	0	1	1	0	0	1	1	0	0	0	1	0	1	1	2	0	0	1	2	0	13	0	1411.66	ACN11468.1;ACI33595.1	ACN11468.1	162	174	yes	no	2	1.3906e-10	179.67	By matching	By matching	By matching	By matching	By MS/MS	By MS/MS	By MS/MS	By MS/MS
AFSLADVIVFPVIAYAFR	VGSYLAGKAFSLADVI	PVIAYAFRFGLSTERY	K	A	F	F	R	F	4	1	0	1	0	0	0	0	0	2	1	0	0	3	1	1	0	0	1	3	0	18	0	1998.1	ACM09168.1;ACM08643.1	ACM08643.1	164	181	no	no	2;3	2.4675e-14	194.77	By MS/MS	By MS/MS	By MS/MS	By MS/MS	By MS/MS	By MS/MS	By MS/MS	By MS/MS
AFTGFIVDADSPGILVGR	DPKCPTSKAFTGFIVD	SPGILVGRKELNMGQR	K	A	F	G	R	K	2	1	0	2	0	0	0	3	0	2	1	0	0	2	1	1	1	0	0	2	0	18	0	1833.96	NP_001133108.1;ACN10798.1;ACH70703.1	NP_001133108.1	219	236	yes	no	2;3	1.015e-37	252.82	By MS/MS	By MS/MS	By MS/MS	By MS/MS	By MS/MS	By MS/MS	By MS/MS	By MS/MS
AFTHTAQYDEAIADYFR	TRKTLALKAFTHTAQY	EAIADYFRGQYSRGVS	K	A	F	F	R	G	4	1	0	2	0	1	1	0	1	1	0	0	0	2	0	0	2	0	2	0	0	17	0	2017.92	NP_001133622.1;ACI33591.1;ACN10681.1	NP_001133622.1	178	194	no	no	2;3	3.7337e-20	216.34	By MS/MS	By MS/MS	By MS/MS	By MS/MS	By MS/MS	By MS/MS	By matching	By MS/MS
AFTLGLAGLLGEGVYNFGELLMHPVLESLR	PETEKQERAFTLGLAG	HPVLESLRSTDKQWLI	R	A	F	L	R	S	2	1	1	0	0	0	3	5	1	0	8	0	1	2	1	1	1	0	1	2	0	30	0	3215.71	NP_001133203.1;ACH70971.1;ACH70972.1	NP_001133203.1	186	215	yes	no	3	3.4176e-18	149.74	By MS/MS	By MS/MS	By matching	By MS/MS	By matching	By MS/MS	By MS/MS	By matching
AFTMAEYLR	HGGQLNKKAFTMAEYL	FTMAEYLRKSGS____	K	A	F	L	R	K	2	1	0	0	0	0	1	0	0	0	1	0	1	1	0	0	1	0	1	0	0	9	0	1100.53	ACI66182.1;ACM08352.1;ACI69044.2	ACI66182.1	127	135	no	no	2	0.0081805	81.525	By matching	By matching	By matching	By matching	By MS/MS	By matching	By matching	By matching
AFVDFFSR	LTVYSASKAFVDFFSR	AFVDFFSRGLEAEYKS	K	A	F	S	R	G	1	1	0	1	0	0	0	0	0	0	0	0	0	3	0	1	0	0	0	1	0	8	0	987.481	NP_001135118.1;ACN11404.1;ACI33951.1	NP_001135118.1	213	220	yes	no	2	0.00059729	129.42	By MS/MS	By matching	By MS/MS	By MS/MS	By MS/MS	By matching	By MS/MS	By matching
AFVEEVTTGQECGVLLDK	VLALRRERAFVEEVTT	ECGVLLDKTSFYAEQG	R	A	F	D	K	T	1	0	0	1	1	1	3	2	0	0	2	1	0	1	0	0	2	0	0	3	0	18	0	1993.97	NP_001133550.1;ACI33457.1	NP_001133550.1	514	531	yes	no	2	0.0091095	65.184	By matching	By matching	By matching	By matching	By matching	By matching	By matching	By matching
AFVHWYVGEGMEEGEFSEAR	FDLMYAKRAFVHWYVG	EGEFSEAREDMAALEK	R	A	F	A	R	E	2	1	0	0	0	0	5	3	1	0	0	0	1	2	0	1	0	1	1	2	0	20	0	2329.01	NP_001167032.1;ACI33964.1;ACH71025.1;ACN10869.1;NP_001133158.1;ACN10896.1;ACH70822.1;ACN58628.1;ACH71026.1;ACI32906.1	NP_001133158.1	403	422	no	no	2;3	1.2641e-16	194.67	By MS/MS	By MS/MS	By matching	By MS/MS	By MS/MS	By MS/MS	By MS/MS	By MS/MS
AFYNDILGAYEEYITTLFGYDK	SKLTLTSRAFYNDILG	TTLFGYDKVLPMNTGV	R	A	F	D	K	V	2	0	1	2	0	0	2	2	0	2	2	1	0	2	0	0	2	0	4	0	0	22	0	2605.23	ACI33259.1	ACI33259.1	116	137	yes	yes	2	5.8823e-20	178.19	By MS/MS	By matching	By matching	By MS/MS	By MS/MS	By matching	By MS/MS	By MS/MS
AFYNQEPFHNPR	________________	QEPFHNPRLPFTGTIQ	M	A	F	P	R	L	1	1	2	0	0	1	1	0	1	0	0	0	0	2	2	0	0	0	1	0	0	12	0	1518.7	ACN10990.1;ACI33460.1	ACN10990.1	2	13	yes	no	2	9.4916e-07	164.04	By MS/MS	By MS/MS	By MS/MS	By MS/MS	By MS/MS	By MS/MS	By MS/MS	By MS/MS
AFYPEEISSMVLVK	VEYKGETKAFYPEEIS	ISSMVLVKMKEIAEAY	K	A	F	V	K	M	1	0	0	0	0	0	2	0	0	1	1	1	1	1	1	2	0	0	1	2	0	14	0	1611.82	ACI33977.1	ACI33977.1	113	126	yes	yes	2;3	3.836e-08	161.21	By MS/MS	By MS/MS	By MS/MS	By MS/MS	By MS/MS	By MS/MS	By MS/MS	By MS/MS
AGAEDFREPSDEER	RDGGPPPRAGAEDFRE	REPSDEERAQRPRLQL	R	A	G	E	R	A	2	2	0	2	0	0	4	1	0	0	0	0	0	1	1	1	0	0	0	0	0	14	1	1606.69	NP_001133347.1;ACN10439.1;ACI33070.1	NP_001133347.1	198	211	yes	no	3	0.032293	58.098	By matching	By matching	By MS/MS	By matching	By matching	By matching	By matching	By matching
AGAGSATLSMAYAGAR	GTEVVKAKAGAGSATL	SMAYAGARFTFSVLDA	K	A	G	A	R	F	6	1	0	0	0	0	0	3	0	0	1	0	1	0	0	2	1	0	1	0	0	16	0	1453.7	NP_001133198.1;ACI68017.1;ACH70949.1;ACH70948.1;NP_001135174.1;ACI66104.1;ACI68220.1	NP_001133198.1	242	257	no	no	2	2.5612e-19	213.99	By MS/MS	By MS/MS	By MS/MS	By MS/MS	By MS/MS	By MS/MS	By MS/MS	By MS/MS
AGAIAPCDVTVPAQNTGLGPEK	NKVPAAARAGAIAPCD	NTGLGPEKTSFFQALG	R	A	G	E	K	T	4	0	1	1	1	1	1	3	0	1	1	1	0	0	3	0	2	0	0	2	0	22	0	2165.08	ACN12263.1;ACN09916.1;ACI70184.1;ACI68961.1;ACN12682.1;ACN10322.1;ACI69835.1;ACH70801.1	ACN12263.1	113	134	no	no	2;3	7.0138e-46	250.64	By MS/MS	By MS/MS	By MS/MS	By MS/MS	By MS/MS	By MS/MS	By MS/MS	By MS/MS
AGCQAIVDTGTSLIIGPAEEVR	GNQLTLCKAGCQAIVD	IGPAEEVRVLHKAIGA	K	A	G	V	R	V	3	1	0	1	1	1	2	3	0	3	1	0	0	0	1	1	2	0	0	2	0	22	0	2256.14	ACI33365.1	ACI33365.1	280	301	yes	yes	2;3	6.9106e-46	250.84	By MS/MS	By MS/MS	By MS/MS	By matching	By MS/MS	By MS/MS	By MS/MS	By MS/MS
AGCTFPEKPDFH	AANVIIRRAGCTFPEK	FPEKPDFH________	R	A	G	F	H	-	1	0	0	1	1	0	1	1	1	0	0	1	0	2	2	0	1	0	0	0	0	12	1	1404.61	NP_001135164.1;ACH70824.1	NP_001135164.1	373	384	yes	no	2;3	4.7365e-08	179.94	By MS/MS	By MS/MS	By MS/MS	By MS/MS	By MS/MS	By MS/MS	By MS/MS	By MS/MS
AGDESGITLGQPHLSK	________________	LGQPHLSKQDLNDLDV	M	A	G	S	K	Q	1	0	0	1	0	1	1	3	1	1	2	1	0	0	1	2	1	0	0	0	0	16	0	1608.81	NP_001167139.1;ACN10919.1	NP_001167139.1	2	17	yes	no	2	8.3391e-07	152.94	By matching	By matching	By matching	By matching	By matching	By matching	By MS/MS	By matching
AGDFQLHTNVNDGTEFGGSIYQK	NNFALGYKAGDFQLHT	FGGSIYQKVNCHLETA	K	A	G	Q	K	V	1	0	2	2	0	2	1	4	1	1	1	1	0	2	0	1	2	0	1	1	0	23	0	2497.15	ACI33557.1;NP_001133093.1;ACH70681.1;ACI32932.1	ACI33557.1	214	236	no	no	3	2.0866e-12	153.36	By matching	By matching	By matching	By MS/MS	By MS/MS	By matching	By matching	By MS/MS
AGDGIVCMNDVYGGTNR	MTISHMLKAGDGIVCM	DVYGGTNRYFRKIAAE	K	A	G	N	R	Y	1	1	2	2	1	0	0	4	0	1	0	0	1	0	0	0	1	0	1	2	0	17	0	1797.78	NP_001133465.1;ACN10804.1;ACI33287.1	NP_001133465.1	106	122	yes	no	2	2.9856e-28	239.19	By MS/MS	By MS/MS	By MS/MS	By MS/MS	By MS/MS	By MS/MS	By MS/MS	By MS/MS
AGDLGLGAVPGR	NTPLGDAKAGDLGLGA	GLGAVPGREEDFRKGL	K	A	G	G	R	E	2	1	0	1	0	0	0	4	0	0	2	0	0	0	1	0	0	0	0	1	0	12	0	1081.59	ACI69245.1;NP_001134497.1;ACI67756.1	ACI69245.1	71	82	yes	no	2	0.00014131	112.94	By matching	By matching	By matching	By matching	By MS/MS	By matching	By MS/MS	By MS/MS
AGDPVNHSVGAELLVSLGQK	RLGAGRSKAGDPVNHS	LLVSLGQKVEKGQPWL	K	A	G	Q	K	V	2	0	1	1	0	1	1	3	1	0	3	1	0	0	1	2	0	0	0	3	0	20	0	1990.05	NP_001133751.1;ACI33838.1	NP_001133751.1	385	404	yes	no	2;3	1.0111e-11	171.39	By MS/MS	By MS/MS	By MS/MS	By MS/MS	By matching	By MS/MS	By MS/MS	By MS/MS
AGELTDDEVER	ADIDLSKRAGELTDDE	LTDDEVERVVTIMQNP	R	A	G	E	R	V	1	1	0	2	0	0	3	1	0	0	1	0	0	0	0	0	1	0	0	1	0	11	0	1232.55	ACX35606.1;ACX35593.1;ACN12267.1;ACN12175.1;ACN09920.1;ACN09828.1;ACI69981.1;ACI69333.1;ACI67484.1;ACI66957.1;ACH70615.1;ABQ59673.1	ACX35606.1	56	66	yes	no	2	7.0965e-06	160.72	By matching	By matching	By MS/MS	By matching	By MS/MS	By matching	By matching	By MS/MS
AGETVVSLCAK	KAVVGAAKAGETVVSL	TVVSLCAKGDAFIMAE	K	A	G	A	K	G	2	0	0	0	1	0	1	1	0	0	1	1	0	0	0	1	1	0	0	2	0	11	0	1133.58	ACI68772.1	ACI68772.1	41	51	yes	yes	2	0.012658	74.611	By matching	By matching	By MS/MS	By matching	By matching	By matching	By matching	By matching
AGEYEALSEK	RRSLPSVRAGEYEALS	EYEALSEKLKRTEWAP	R	A	G	E	K	L	2	0	0	0	0	0	3	1	0	0	1	1	0	0	0	1	0	0	1	0	0	10	0	1095.51	NP_001158793.1;ACN10483.1	NP_001158793.1	143	152	yes	no	2	8.1268e-05	153.1	By MS/MS	By MS/MS	By MS/MS	By MS/MS	By MS/MS	By MS/MS	By MS/MS	By matching
AGFAGDDAPR	DNGSGMCKAGFAGDDA	FAGDDAPRAVFPSIVG	K	A	G	P	R	A	3	1	0	2	0	0	0	2	0	0	0	0	0	1	1	0	0	0	0	0	0	10	0	975.441	O42161.1;NP_001116997.1;ACN11317.1;ACI33371.1;AAB65430.1;ACI67042.1;NP_001133115.1;NP_001117011.1;ACH70896.1;ACH70895.1;ACH70894.1;ACH70714.1;AAG25672.1	O42161.1	19	28	no	no	2	0.00014121	148.56	By MS/MS	By MS/MS	By MS/MS	By MS/MS	By MS/MS	By MS/MS	By MS/MS	By MS/MS
AGFAGDQIPK	DNGSGVVKAGFAGDQI	FAGDQIPKYCFPNYVG	K	A	G	P	K	Y	2	0	0	1	0	1	0	2	0	1	0	1	0	1	1	0	0	0	0	0	0	10	0	1002.51	NP_001158877.1;ACN10660.1	NP_001158877.1	23	32	yes	no	2	0.015873	72.096	By matching	By matching	By matching	By matching	By matching	By matching	By matching	By MS/MS
AGGGTIVENTTQGIAR	EELHEYRKAGGGTIVE	NTTQGIARDLPCLKQL	K	A	G	A	R	D	2	1	1	0	0	1	1	4	0	2	0	0	0	0	0	0	3	0	0	1	0	16	0	1543.8	NP_001135294.1;B5X4Y9.1;ACI34370.1	NP_001135294.1	90	105	yes	no	2	5.2268e-34	244	By MS/MS	By MS/MS	By MS/MS	By MS/MS	By MS/MS	By MS/MS	By MS/MS	By MS/MS
AGGLGDIHIPLLADLNK	AWIKTPRKAGGLGDIH	PLLADLNKQVSRDYGI	K	A	G	N	K	Q	2	0	1	2	0	0	0	3	1	2	4	1	0	0	1	0	0	0	0	0	0	17	0	1715.96	ADM15936.1;ACI69604.1	ADM15936.1	144	160	yes	no	3	3.7948e-05	125.73	By MS/MS	By MS/MS	By MS/MS	By matching	By matching	By MS/MS	By MS/MS	By matching
AGGQVMTFDQLALAAPK	GARRRILKAGGQVMTF	QLALAAPKGQGTVLLS	K	A	G	P	K	G	4	0	0	1	0	2	0	2	0	0	2	1	1	1	1	0	1	0	0	1	0	17	0	1716.89	ACH85360.1;ACN12347.1;ACN10000.1;ACI68700.1	ACH85360.1	115	131	yes	no	2	3.8847e-62	304.03	By MS/MS	By MS/MS	By MS/MS	By MS/MS	By MS/MS	By MS/MS	By MS/MS	By MS/MS
AGGSASAMLQPLLDNQIGFK	SYQRDTYKAGGSASAM	LDNQIGFKNMEGVQHL	K	A	G	F	K	N	3	0	1	1	0	2	0	3	0	1	3	1	1	1	1	2	0	0	0	0	0	20	0	2017.03	ACI67092.1;ACI68289.1	ACI68289.1	161	180	no	no	2;3	1.2582e-22	208.4	By MS/MS	By MS/MS	By MS/MS	By MS/MS	By MS/MS	By MS/MS	By MS/MS	By MS/MS
AGHFDQEIVPVMVPSR	NRTEAAQKAGHFDQEI	VPVMVPSRKGPVEVKA	K	A	G	S	R	K	1	1	0	1	0	1	1	1	1	1	0	0	1	1	2	1	0	0	0	3	0	16	0	1780.89	NP_001133421.1;ACI33207.1	NP_001133421.1	193	208	yes	no	2;3	2.853e-26	227.63	By MS/MS	By MS/MS	By MS/MS	By MS/MS	By MS/MS	By MS/MS	By MS/MS	By MS/MS
AGHYAANVIIR	KELEQCVKAGHYAANV	YAANVIIRRAGCTFPE	K	A	G	I	R	R	3	1	1	0	0	0	0	1	1	2	0	0	0	0	0	0	0	0	1	1	0	11	0	1183.65	NP_001135164.1;ACH70824.1;NP_001158773.1;ACN12792.1;ACN10426.1	NP_001135164.1	361	371	yes	no	2	9.2919e-05	139.38	By MS/MS	By MS/MS	By MS/MS	By MS/MS	By MS/MS	By MS/MS	By MS/MS	By MS/MS
AGIANLYGIAGSTNVTGDQVK	AISTAVRKAGIANLYG	NVTGDQVKKLDILSNN	K	A	G	V	K	K	3	0	2	1	0	1	0	4	0	2	1	1	0	0	0	1	2	0	1	2	0	21	0	2048.05	ACN60281.1	ACN60281.1	43	63	yes	yes	2;3	2.8354e-96	342.98	By MS/MS	By MS/MS	By MS/MS	By MS/MS	By MS/MS	By MS/MS	By MS/MS	By MS/MS
AGIAVTLAGLTGK	IPVDVMRRAGIAVTLA	TLAGLTGKDPVQCSRD	R	A	G	G	K	D	3	0	0	0	0	0	0	3	0	1	2	1	0	0	0	0	2	0	0	1	0	13	0	1170.7	ACI69371.1;ACH70628.1;NP_001116995.1;BAB84671.1	ACI69371.1	29	41	yes	no	2	8.5697e-11	186.76	By MS/MS	By MS/MS	By MS/MS	By MS/MS	By MS/MS	By MS/MS	By MS/MS	By MS/MS
AGILFEDIFDVK	________________	FEDIFDVKDIDPDGMK	M	A	G	V	K	D	1	0	0	2	0	0	1	1	0	2	1	1	0	2	0	0	0	0	0	1	0	12	0	1365.72	NP_001140124.1;ACM08625.1	NP_001140124.1	2	13	yes	no	2	0.0010018	100.93	By matching	By MS/MS	By matching	By matching	By matching	By MS/MS	By matching	By MS/MS
AGKYDLDFK	VAASEFYKAGKYDLDF	GKYDLDFKSPDDPARY	K	A	G	F	K	S	1	0	0	2	0	0	0	1	0	0	1	2	0	1	0	0	0	0	1	0	0	9	1	1055.53	NP_001133193.1;B5DGQ7.1;ACH70932.1;ACH70931.1;NP_001135172.1;ACH70930.1	NP_001133193.1	254	262	yes	no	2	0.0087093	118.03	By matching	By matching	By MS/MS	By matching	By matching	By matching	By matching	By matching
AGLLGLEFFTPESK	INWLNMVRAGLLGLEF	EFFTPESKSWRQAHMQ	R	A	G	S	K	S	1	0	0	0	0	0	2	2	0	0	3	1	0	2	1	1	1	0	0	0	0	14	0	1507.79	NP_001133876.1;ACI34066.1	NP_001133876.1	548	561	yes	no	2	3.5421e-25	222.94	By MS/MS	By MS/MS	By matching	By MS/MS	By MS/MS	By MS/MS	By MS/MS	By MS/MS
AGLNSLEAVK	________________	LNSLEAVKRKIQCLQQ	M	A	G	V	K	R	2	0	1	0	0	0	1	1	0	0	2	1	0	0	0	1	0	0	0	1	0	10	0	1000.56	NP_001133629.1;ACN10541.1;ACI33603.1	NP_001133629.1	2	11	yes	no	2	0.033882	61.56	By matching	By matching	By matching	By matching	By matching	By matching	By matching	By matching
AGLPCQDLEFVQFHPTGIYGAGCLITEGCR	DGNAMVTRAGLPCQDL	CLITEGCRGEGGILIN	R	A	G	C	R	G	2	1	0	1	3	2	2	5	1	2	3	0	0	2	2	0	2	0	1	1	0	30	0	3365.56	NP_001133088.1;ACH70672.1;ACI32957.1	NP_001133088.1	279	308	yes	no	3	1.399e-08	106.11	By matching	By MS/MS	By matching	By MS/MS	By MS/MS	By MS/MS	By MS/MS	By MS/MS
AGLQFPVGR	KAVSRSQRAGLQFPVG	GLQFPVGRIHRHLKTR	R	A	G	G	R	I	1	1	0	0	0	1	0	2	0	0	1	0	0	1	1	0	0	0	0	1	0	9	0	943.524	ADM16155.1;ADM16115.1;ACN12505.1;ACN12374.1;ACN10153.1;ACN10027.1;ACM09557.1;ACI69641.1;ACI68191.1;ACI67816.1;ACI66843.1;ACI66770.1;ACI66137.1;ACI66110.1;ACI34256.1;ACH70792.1;ACM09081.1;ACI69610.1;ACI69794.1;ACN12300.1;ACN11470.1;ACN09953.1;ACI66032.1;ACI67021.1	ADM16155.1	24	32	no	no	2	0.00017355	157.91	By MS/MS	By MS/MS	By MS/MS	By MS/MS	By MS/MS	By MS/MS	By MS/MS	By MS/MS
AGLSASEVEELLK	SLSEAAMKAGLSASEV	SEVEELLKLSTSKEIK	K	A	G	L	K	L	2	0	0	0	0	0	3	1	0	0	3	1	0	0	0	2	0	0	0	1	0	13	0	1344.71	NP_001135162.1;ACH70777.1	NP_001135162.1	148	160	yes	no	2	7.3618e-21	238.07	By MS/MS	By MS/MS	By MS/MS	By MS/MS	By MS/MS	By MS/MS	By MS/MS	By MS/MS
AGLTHIITMDLHQK	LLASMLAKAGLTHIIT	ITMDLHQKEIQGFFSF	K	A	G	Q	K	E	1	0	0	1	0	1	0	1	2	2	2	1	1	0	0	0	2	0	0	0	0	14	0	1576.84	NP_001135368.1;ACI69627.1	NP_001135368.1	125	138	yes	no	3	3.2817e-08	158.34	By matching	By MS/MS	By matching	By matching	By matching	By matching	By MS/MS	By MS/MS
AGMIVTFAPANVTTEVK	RVETGTLKAGMIVTFA	ANVTTEVKSVEMHHET	K	A	G	V	K	S	3	0	1	0	0	0	1	1	0	1	0	1	1	1	1	0	3	0	0	3	0	17	0	1747.92	NP_001117101.1;ACN12790.1;ACN10846.1;ACN10424.1;ACH70682.1;AAG38613.1;ACN11081.1;NP_001135381.1;ACH70684.1;ACN10642.1	ACN11081.1	274	290	no	no	2;3	2.4314e-37	252.1	By MS/MS	By MS/MS	By MS/MS	By MS/MS	By MS/MS	By MS/MS	By MS/MS	By MS/MS
AGMVAEFESK	FYKTNVARAGMVAEFE	MVAEFESKFSSLTIPE	R	A	G	S	K	F	2	0	0	0	0	0	2	1	0	0	0	1	1	1	0	1	0	0	0	1	0	10	0	1067.5	NP_001133159.1;ACI69093.1;ACH70827.1;ACN12181.1;ACN09834.1	NP_001133159.1	64	73	no	no	2	0.00020927	143.4	By MS/MS	By MS/MS	By MS/MS	By MS/MS	By MS/MS	By MS/MS	By MS/MS	By MS/MS
AGNFIGWLHIEGVNLSVALVENALSK	VEVESMDKAGNFIGWL	LVENALSKVHFTAERS	K	A	G	S	K	V	3	0	3	0	0	0	2	3	1	2	4	1	0	1	0	2	0	1	0	3	0	26	0	2750.48	ACN60284.1	ACN60284.1	545	570	yes	yes	3	1.0617e-09	120.33	By MS/MS	By MS/MS	By matching	By MS/MS	By MS/MS	By MS/MS	By MS/MS	By MS/MS
AGNLGGGVVSIER	ERIKVNGKAGNLGGGV	GGVVSIERSKSKISVN	K	A	G	E	R	S	1	1	1	0	0	0	1	4	0	1	1	0	0	0	0	1	0	0	0	2	0	13	0	1227.66	ACN12251.1;ACN09904.1;ACN12302.1;ACN09955.1;ACM08696.1;ACH70892.1;ADM16056.1;ACI67011.1;ACH85303.1;ACI69845.1;ACI67544.1;ACI67208.1	ACH85303.1	56	68	no	no	2	0.00010598	123.1	By MS/MS	By MS/MS	By MS/MS	By MS/MS	By MS/MS	By MS/MS	By MS/MS	By MS/MS
AGPIWDLR	ELVPLFEKAGPIWDLR	AGPIWDLRLMMDPLSG	K	A	G	L	R	L	1	1	0	1	0	0	0	1	0	1	1	0	0	0	1	0	0	1	0	0	0	8	0	926.497	ACN11290.1;ACN10937.1;ACN11421.1;ACN11156.1;ACN60188.1;ACN11217.1	ACN60188.1	190	197	no	no	2	0.0010148	116.73	By MS/MS	By matching	By MS/MS	By matching	By MS/MS	By MS/MS	By MS/MS	By matching
AGPSVGELIVK	KAAAKPKKAGPSVGEL	SVGELIVKAVSASKER	K	A	G	V	K	A	1	0	0	0	0	0	1	2	0	1	1	1	0	0	1	1	0	0	0	2	0	11	0	1068.62	P84408.3;CAI46350.1	P84408.3	28	38	yes	no	2	7.0105e-06	160.91	By MS/MS	By MS/MS	By MS/MS	By MS/MS	By MS/MS	By MS/MS	By MS/MS	By MS/MS
AGPWTPEAAAEHPEAVR	LEKRGYVKAGPWTPEA	AEHPEAVRQLHREFLR	K	A	G	V	R	Q	5	1	0	0	0	0	3	1	1	0	0	0	0	0	3	0	1	1	0	1	0	17	0	1787.86	NP_001133157.1;ACH70821.1	NP_001133157.1	38	54	yes	no	2;3	5.1488e-20	214.89	By MS/MS	By MS/MS	By MS/MS	By MS/MS	By MS/MS	By MS/MS	By MS/MS	By MS/MS
AGQAVDDFIDK	RRIVMLVKAGQAVDDF	AVDDFIDKLVPLLEAG	K	A	G	D	K	L	2	0	0	3	0	1	0	1	0	1	0	1	0	1	0	0	0	0	0	1	0	11	0	1177.56	ACN10812.1;ACI70192.1;ACI66086.1;ACI70150.1;ACI68129.1	ACN10812.1	77	87	yes	no	2	7.3392e-11	171.26	By MS/MS	By MS/MS	By MS/MS	By MS/MS	By MS/MS	By MS/MS	By MS/MS	By MS/MS
AGQAVDDFIDKLVPLLEAGDIIIDGGNSEYR	RRIVMLVKAGQAVDDF	DGGNSEYRDTTRRCKS	K	A	G	Y	R	D	3	1	1	5	0	1	2	4	0	4	3	1	0	1	1	1	0	0	1	2	0	31	1	3302.67	ACN10812.1;ACI70192.1;ACI66086.1;ACI70150.1;ACI68129.1	ACN10812.1	77	107	yes	no	3	3.4323e-18	149.44	By matching	By MS/MS	By MS/MS	By MS/MS	By MS/MS	By matching	By matching	By matching
AGSATLTTIISNPR	LQRQKLEKAGSATLTT	TTIISNPRAVQVCKRY	K	A	G	P	R	A	2	1	1	0	0	0	0	1	0	2	1	0	0	0	1	2	3	0	0	0	0	14	0	1400.76	ACM08542.1	ACM08542.1	40	53	yes	yes	2	0.00062335	101.43	By matching	By matching	By matching	By matching	By matching	By MS/MS	By matching	By matching
AGSNVMQTFTFYASDDK	QLHREFLRAGSNVMQT	TFYASDDKLENRGNAQ	R	A	G	D	K	L	2	0	1	2	0	1	0	1	0	0	0	1	1	2	0	2	2	0	1	1	0	17	0	1880.83	NP_001133157.1;ACH70821.1	NP_001133157.1	63	79	yes	no	2	1.4938e-89	342.97	By MS/MS	By MS/MS	By MS/MS	By MS/MS	By MS/MS	By MS/MS	By MS/MS	By MS/MS
AGSNVMQTFTFYASDDKLENR	QLHREFLRAGSNVMQT	SDDKLENRGNAQRFTG	R	A	G	N	R	G	2	1	2	2	0	1	1	1	0	0	1	1	1	2	0	2	2	0	1	1	0	21	1	2393.1	NP_001133157.1;ACH70821.1	NP_001133157.1	63	83	yes	no	2;3	1.8351e-66	306.11	By MS/MS	By MS/MS	By MS/MS	By MS/MS	By MS/MS	By MS/MS	By MS/MS	By MS/MS
AGSQQAASEHGIIIVAPDTSPR	TEQNFITKAGSQQAAS	VAPDTSPRGCNIEGED	K	A	G	P	R	G	4	1	0	1	0	2	1	2	1	3	0	0	0	0	2	3	1	0	0	1	0	22	0	2204.12	NP_001135000.1;ACI69817.1	NP_001135000.1	65	86	yes	no	3	0.0004715	75.319	By MS/MS	By MS/MS	By MS/MS	By matching	By MS/MS	By MS/MS	By matching	By matching
AGSVPSLAAGLLFGGLAGVGAYQISQDPK	GGAMGYVKAGSVPSLA	YQISQDPKNIWVSLVT	K	A	G	P	K	N	5	0	0	1	0	2	0	6	0	1	4	1	0	1	2	3	0	0	1	2	0	29	0	2743.45	NP_001134630.1;ACI68269.1	NP_001134630.1	24	52	yes	no	3	1.2527e-10	120.33	By MS/MS	By MS/MS	By MS/MS	By matching	By MS/MS	By MS/MS	By MS/MS	By matching
AGTQIENIEEDFR	WCNSHLRKAGTQIENI	ENIEEDFRDGLKLMLL	K	A	G	F	R	D	1	1	1	1	0	1	3	1	0	2	0	0	0	1	0	0	1	0	0	0	0	13	0	1520.71	NP_001167055.1;ACN10704.1;CAD59068.1	NP_001167055.1	52	64	yes	no	2	1.4698e-27	249.19	By MS/MS	By MS/MS	By MS/MS	By matching	By MS/MS	By MS/MS	By MS/MS	By matching
AGTVWINCYDVFGVQAPFGGYK	HYISSGLRAGTVWINC	QAPFGGYKYSGNGREL	R	A	G	Y	K	Y	2	0	1	1	1	1	0	4	0	1	0	1	0	2	1	0	1	1	2	3	0	22	0	2448.16	ACI33614.1	ACI33614.1	466	487	yes	yes	2;3	2.3926e-35	222.13	By MS/MS	By MS/MS	By MS/MS	By MS/MS	By MS/MS	By MS/MS	By MS/MS	By MS/MS
AGVASHFVESQK	LKGRDVQRAGVASHFV	SHFVESQKIAALEKEL	R	A	G	Q	K	I	2	0	0	0	0	1	1	1	1	0	0	1	0	1	0	2	0	0	0	2	0	12	0	1258.63	ACN11180.1	ACN11180.1	206	217	yes	yes	2	3.1592e-05	138.2	By MS/MS	By MS/MS	By MS/MS	By matching	By MS/MS	By matching	By matching	By matching
AGVLAGHDNR	WDTLKADRAGVLAGHD	VLAGHDNRVSCLGVTD	R	A	G	N	R	V	2	1	1	1	0	0	0	2	1	0	1	0	0	0	0	0	0	0	0	1	0	10	0	1008.51	ACI34147.1;ACN58637.1;ACI34279.1;ACI33136.1	ACI34147.1	305	314	no	no	2	0.00017353	146.11	By MS/MS	By MS/MS	By MS/MS	By MS/MS	By MS/MS	By MS/MS	By MS/MS	By MS/MS
AGVNTVTTLVESK	TKRPPVLRAGVNTVTT	VTTLVESKKAQLVVIA	R	A	G	S	K	K	1	0	1	0	0	0	1	1	0	0	1	1	0	0	0	1	3	0	0	3	0	13	0	1317.71	ACH85352.1;NP_001134228.1;AGH92587.1;ACN12693.1;ACN12680.1;ACN10333.1;ACN10320.1;ACI66701.1;ACH70989.1	ACH85352.1	134	146	yes	no	2	1.3385e-36	272.59	By MS/MS	By MS/MS	By MS/MS	By MS/MS	By MS/MS	By MS/MS	By MS/MS	By MS/MS
AGVPMEVMGLMLGEFVDDYTVR	LKMLKHGRAGVPMEVM	FVDDYTVRVIDVFAMP	R	A	G	V	R	V	1	1	0	2	0	0	2	3	0	0	2	0	3	1	1	0	1	0	1	4	0	22	0	2428.15	NP_001135360.1;ADM16265.1;ACI69220.1;ACI67841.1	NP_001135360.1	47	68	yes	no	2;3	6.2105e-20	177.08	By matching	By MS/MS	By MS/MS	By MS/MS	By MS/MS	By MS/MS	By matching	By MS/MS
AGWHDAGAGYNETDTHLEILGK	FSKGEDCKAGWHDAGA	THLEILGKPVMERWET	K	A	G	G	K	P	3	0	1	2	0	0	2	4	2	1	2	1	0	0	0	0	2	1	1	0	0	22	0	2354.09	NP_001134995.1;ACI70175.1;ACI69772.1;ACI68926.1;ACH70789.1	NP_001134995.1	16	37	yes	no	4	0.005321	59.372	By MS/MS	By MS/MS	By matching	By matching	By matching	By matching	By MS/MS	By matching
AGWHDAGAGYNETDTHLEILGKPVMER	FSKGEDCKAGWHDAGA	LGKPVMERWETPYMHS	K	A	G	E	R	W	3	1	1	2	0	0	3	4	2	1	2	1	1	0	1	0	2	1	1	1	0	27	1	2966.4	NP_001134995.1;ACI70175.1;ACI69772.1;ACI68926.1;ACH70789.1	NP_001134995.1	16	42	yes	no	4;5	1.3184e-07	104.45	By matching	By MS/MS	By matching	By MS/MS	By MS/MS	By MS/MS	By MS/MS	By MS/MS
AGWQLDQVDLFEINEAFAAQSIAVVK	AIRKAVAKAGWQLDQV	AQSIAVVKELGLNPDK	K	A	G	V	K	E	5	0	1	2	0	3	2	1	0	2	2	1	0	2	0	1	0	1	0	3	0	26	0	2861.46	NP_001133421.1;ACI33207.1	NP_001133421.1	306	331	yes	no	3	1.7355e-09	112.85	By MS/MS	By MS/MS	By MS/MS	By matching	By MS/MS	By matching	By matching	By matching
AHEGGVYAVSWSPDSSQLISASGDK	ICALGGAKAHEGGVYA	LISASGDKTVKLWDVG	K	A	H	D	K	T	3	0	0	2	0	1	1	3	1	1	1	1	0	0	1	6	0	1	1	2	0	25	0	2547.19	ACI33321.1	ACI33321.1	232	256	yes	yes	3	2.7521e-06	98.3	By matching	By matching	By matching	By matching	By matching	By MS/MS	By MS/MS	By matching
AHFEQWGSLTDCVVMR	ETTDESLRAHFEQWGS	LTDCVVMRDPANKRSR	R	A	H	M	R	D	1	1	0	1	1	1	1	1	1	0	1	0	1	1	0	1	1	1	0	2	0	16	0	1934.88	ACN12767.1;ACN10402.1	ACN12767.1	31	46	yes	no	3	0.00029549	106.29	By matching	By matching	By matching	By MS/MS	By matching	By matching	By MS/MS	By MS/MS
AHGGYSVFAGVGER	ELINNVAKAHGGYSVF	VFAGVGERTREGNDLY	K	A	H	E	R	T	2	1	0	0	0	0	1	4	1	0	0	0	0	1	0	1	0	0	1	2	0	14	0	1405.67	ACH85277.1	ACH85277.1	193	206	yes	yes	2;3	9.9755e-05	125.73	By MS/MS	By MS/MS	By MS/MS	By MS/MS	By MS/MS	By MS/MS	By MS/MS	By MS/MS
AHQDFGYFYGSSYVAAPDGSR	FTSGDGKKAHQDFGYF	VAAPDGSRSPGLSRTR	K	A	H	S	R	S	3	1	0	2	0	1	0	3	1	0	0	0	0	2	1	3	0	0	3	1	0	21	0	2294	NP_001140121.1;ACM08325.1	NP_001140121.1	305	325	yes	no	3	0.0014471	69.612	By MS/MS	By MS/MS	By MS/MS	By MS/MS	By MS/MS	By MS/MS	By MS/MS	By MS/MS
AHQLVMEGYNWCHDR	NGLTLVSRAHQLVMEG	GYNWCHDRNVVTIFSA	R	A	H	D	R	N	1	1	1	1	1	1	1	1	2	0	1	0	1	0	0	0	0	1	1	1	0	15	0	1914.83	ACI33113.1;NP_001167080.1;ACN10756.1	ACI33113.1	240	254	yes	no	3	0.0023395	83.633	By matching	By matching	By matching	By matching	By matching	By matching	By matching	By MS/MS
AHQVVEDGYEFFAK	HDMDLICRAHQVVEDG	DGYEFFAKRQLVTLFS	R	A	H	A	K	R	2	0	0	1	0	1	2	1	1	0	0	1	0	2	0	0	0	0	1	2	0	14	0	1638.77	NP_001135184.1;ACI32941.1;ACN58678.1;NP_001133092.1;ACH70679.1;NP_001135160.1;ACN12554.1;ACN10200.1;ACI69393.1;ACH70762.1	NP_001135184.1	247	260	no	no	2	1.7268e-05	132.65	By MS/MS	By MS/MS	By matching	By matching	By MS/MS	By matching	By matching	By matching
AHSIHIMK	MGARHRARAHSIHIMK	AHSIHIMKVQEIAANK	R	A	H	M	K	V	1	0	0	0	0	0	0	0	2	2	0	1	1	0	0	1	0	0	0	0	0	8	0	935.501	O57561.1;NP_001116999.1;ADM15926.1;ACI69714.1;ACI66940.1;ACI66513.1;ACI66120.1;ACH70788.1;AAC03021.1;ACN12709.1;ACN10349.1;ACN12415.1;ACN10068.1	O57561.1	121	128	yes	no	2	0.00024271	127.02	By MS/MS	By MS/MS	By MS/MS	By MS/MS	By MS/MS	By MS/MS	By MS/MS	By MS/MS
AHSSMVGVNLSQK	DAFGTAHRAHSSMVGV	VGVNLSQKAAGFLMKK	R	A	H	Q	K	A	1	0	1	0	0	1	0	1	1	0	1	1	1	0	0	3	0	0	0	2	0	13	0	1356.68	NP_001133266.1;ACI32927.1;ACH70652.1	ACH70652.1	172	184	no	no	2	6.535e-15	209.25	By MS/MS	By MS/MS	By MS/MS	By MS/MS	By MS/MS	By MS/MS	By MS/MS	By MS/MS
AHVPVAVQVLSLDDPALEK	AAVNEKIRAHVPVAVQ	LDDPALEKVRSRGLPD	R	A	H	E	K	V	3	0	0	2	0	1	1	0	1	0	3	1	0	0	2	1	0	0	0	4	0	19	0	2000.09	NP_001133686.1;ACI33700.1	NP_001133686.1	163	181	yes	no	3	0.011268	68.123	By matching	By matching	By matching	By matching	By matching	By matching	By matching	By MS/MS
AHVTGYMGPDQLDAALK	DLSHIETRAHVTGYMG	DQLDAALKGCDVVVIP	R	A	H	L	K	G	3	0	0	2	0	1	0	2	1	0	2	1	1	0	1	0	1	0	1	1	0	17	0	1785.87	ACH70948.1;NP_001135174.1;ACI66104.1;ACI67899.1;ACI68220.1;ACI66609.1	ACH70948.1	75	91	yes	no	3	0.026005	55.097	By matching	By matching	By matching	By matching	By matching	By matching	By matching	By matching
AHVTGYMGPDQLNAALK	DLSHIETRAHVTGYMG	DQLNAALKGCDVVVIP	R	A	H	L	K	G	3	0	1	1	0	1	0	2	1	0	2	1	1	0	1	0	1	0	1	1	0	17	0	1784.89	NP_001133198.1;ACI68017.1;ACH70949.1	NP_001133198.1	75	91	yes	no	2;3	1.8369e-13	186.96	By MS/MS	By MS/MS	By MS/MS	By MS/MS	By MS/MS	By MS/MS	By MS/MS	By MS/MS
AHYISSGLR	VFTKDIDKAHYISSGL	HYISSGLRAGTVWINC	K	A	H	L	R	A	1	1	0	0	0	0	0	1	1	1	1	0	0	0	0	2	0	0	1	0	0	9	0	1002.52	ACI33614.1	ACI33614.1	457	465	yes	yes	2	0.0012171	117.81	By matching	By MS/MS	By matching	By matching	By MS/MS	By matching	By matching	By MS/MS
AHYMVQPLAFHTPDCNCQGFIDLPEFPFGLEPR	GVERAGLKAHYMVQPL	FPFGLEPRILTRWDMH	K	A	H	P	R	I	2	1	1	2	2	2	2	2	2	1	3	0	1	4	5	0	1	0	1	1	0	33	0	3902.8	NP_001133157.1;ACH70821.1	NP_001133157.1	237	269	yes	no	3;4	5.8203e-06	80.067	By MS/MS	By MS/MS	By MS/MS	By MS/MS	By matching	By MS/MS	By MS/MS	By MS/MS
AHYQTELETQGHGTVLDIDGMVIAQVLHR	DYYSILRRAHYQTELE	VIAQVLHRLGAGRSKA	R	A	H	H	R	L	2	1	0	2	0	3	2	3	3	2	3	0	1	0	0	0	3	0	1	3	0	29	0	3230.61	NP_001133751.1;ACI33838.1	NP_001133751.1	349	377	yes	no	3;4	2.2492e-34	211.5	By MS/MS	By MS/MS	By MS/MS	By MS/MS	By MS/MS	By matching	By MS/MS	By MS/MS
AIADAAEVENYGVR	HGVIGFSRAIADAAEV	EVENYGVRINTLCPAF	R	A	I	V	R	I	4	1	1	1	0	0	2	1	0	1	0	0	0	0	0	0	0	0	1	2	0	14	0	1476.72	ACM09410.1;ACM08802.1	ACM09410.1	164	177	yes	no	2	1.6069e-18	214.61	By MS/MS	By MS/MS	By matching	By MS/MS	By MS/MS	By MS/MS	By MS/MS	By MS/MS
AIAELGIYPAVDPLDSTSR	DATTVLSRAIAELGIY	DPLDSTSRIMDPNIVG	R	A	I	S	R	I	3	1	0	2	0	0	1	1	0	2	2	0	0	0	2	2	1	0	1	1	0	19	0	1987.03	ACH85277.1	ACH85277.1	355	373	yes	yes	2;3	3.9017e-16	191.35	By MS/MS	By MS/MS	By MS/MS	By MS/MS	By MS/MS	By MS/MS	By MS/MS	By MS/MS
AIAHLTQHR	YRRDIGHRAIAHLTQH	IAHLTQHRGLTYKDSG	R	A	I	H	R	G	2	1	0	0	0	1	0	0	2	1	1	0	0	0	0	0	1	0	0	0	0	9	0	1045.58	ACN10564.1	ACN10564.1	425	433	yes	yes	2	1.166e-06	195.05	By MS/MS	By MS/MS	By MS/MS	By MS/MS	By MS/MS	By MS/MS	By MS/MS	By MS/MS
AICTEAGLMALR	DLSGADIKAICTEAGL	EAGLMALRERRMKVTN	K	A	I	L	R	E	3	1	0	0	1	0	1	1	0	1	2	0	1	0	0	0	1	0	0	0	0	12	0	1304.66	ACH85269.1;ACN10996.1;ACI68908.1;ACN12452.1;ACN10104.1;ADM16230.1;ACI66263.1	ACH85269.1	395	406	yes	no	2	0.0095692	76.165	By matching	By matching	By matching	By MS/MS	By MS/MS	By matching	By matching	By matching
AIDIAENEMPGLMK	SLAEWGRKAIDIAENE	NEMPGLMKMREMYGQS	K	A	I	M	K	M	2	0	1	1	0	0	2	1	0	2	1	1	2	0	1	0	0	0	0	0	0	14	0	1530.74	NP_001135793.1;NP_001133847.1;ACN10496.1;ACI34009.1;ACH70814.1	NP_001135793.1	21	34	yes	no	2	2.1131e-25	230.69	By MS/MS	By MS/MS	By MS/MS	By MS/MS	By MS/MS	By MS/MS	By MS/MS	By MS/MS
AIDINPDSAQPYK	AAKRDCDRAIDINPDS	PDSAQPYKWRGKAHKL	R	A	I	Y	K	W	2	0	1	2	0	1	0	0	0	2	0	1	0	0	2	1	0	0	1	0	0	13	0	1430.7	NP_001133946.1;ACI34192.1	NP_001133946.1	175	187	yes	no	2	2.471e-07	159.58	By MS/MS	By MS/MS	By MS/MS	By MS/MS	By MS/MS	By MS/MS	By MS/MS	By MS/MS
AIDSLQLTALK	RNFDELLRAIDSLQLT	SLQLTALKKVATPVDW	R	A	I	L	K	K	2	0	0	1	0	1	0	0	0	1	3	1	0	0	0	1	1	0	0	0	0	11	0	1171.68	ACI67571.1	ACI67571.1	162	172	yes	yes	2	4.8003e-11	199.82	By MS/MS	By MS/MS	By MS/MS	By MS/MS	By MS/MS	By MS/MS	By MS/MS	By MS/MS
AIDWLAFAER	AGKRAALKAIDWLAFA	DWLAFAERVPPNQRAM	K	A	I	E	R	V	3	1	0	1	0	0	1	0	0	1	1	0	0	1	0	0	0	1	0	0	0	10	0	1190.61	NP_001133159.1;ACI69093.1;ACH70827.1;ACN12181.1;ACN09834.1	NP_001133159.1	10	19	no	no	2	4.8733e-05	160.53	By MS/MS	By MS/MS	By MS/MS	By MS/MS	By MS/MS	By MS/MS	By MS/MS	By MS/MS
AIEAGLSMK	GAGLLAKKAIEAGLSM	IEAGLSMKPYIKTSLS	K	A	I	M	K	P	2	0	0	0	0	0	1	1	0	1	1	1	1	0	0	1	0	0	0	0	0	9	0	918.484	NP_001133702.1;ACI33729.1	NP_001133702.1	466	474	yes	no	2	0.052394	54.982	By matching	By matching	By matching	By matching	By matching	By MS/MS	By matching	By MS/MS
AIFVDLEPTVIDEVR	GIGKYVPRAIFVDLEP	PTVIDEVRTGTYRQLF	R	A	I	V	R	T	1	1	0	2	0	0	2	0	0	2	1	0	0	1	1	0	1	0	0	3	0	15	0	1714.91	NP_001167032.1;ACI33964.1;ACH71025.1;ACN10869.1;NP_001133158.1;ACN10896.1;ACH70822.1	NP_001133158.1	65	79	no	no	2;3	1.4013e-25	228.03	By MS/MS	By MS/MS	By MS/MS	By MS/MS	By MS/MS	By MS/MS	By MS/MS	By MS/MS
AIFVTVDTPYLGK	RAEEAGYKAIFVTVDT	VDTPYLGKRRDDVRNR	K	A	I	G	K	R	1	0	0	1	0	0	0	1	0	1	1	1	0	1	1	0	2	0	1	2	0	13	0	1422.78	ACN12757.1;ACN10394.1;NP_001135240.1;ACI33762.1	ACN12757.1	154	166	yes	no	2	2.7421e-06	134.49	By matching	By matching	By matching	By matching	By matching	By matching	By MS/MS	By matching
AIGALPLLMGEYWIDCK	EEVRVLHKAIGALPLL	GEYWIDCKKVPSLPVI	K	A	I	C	K	K	2	0	0	1	1	0	1	2	0	2	3	1	1	0	1	0	0	1	1	0	0	17	0	1948.98	ACI33365.1	ACI33365.1	306	322	yes	yes	2;3	2.0117e-19	199.58	By MS/MS	By MS/MS	By MS/MS	By MS/MS	By MS/MS	By MS/MS	By MS/MS	By MS/MS
AIGATPLIQGEYMVNCDK	AEVKALQKAIGATPLI	EYMVNCDKIPTMPDIT	K	A	I	D	K	I	2	0	1	1	1	1	1	2	0	2	1	1	1	0	1	0	1	0	1	1	0	18	0	1978.95	ACN10838.1;ACH70630.1	ACN10838.1	302	319	yes	no	2	1.4318e-13	178.57	By matching	By matching	By matching	By matching	By matching	By matching	By matching	By matching
AIGVDNPAAK	NDGATILKAIGVDNPA	GVDNPAAKVLVDMSKT	K	A	I	A	K	V	3	0	1	1	0	0	0	1	0	1	0	1	0	0	1	0	0	0	0	1	0	10	0	954.513	NP_001133605.1;ACI33559.1	NP_001133605.1	73	82	yes	no	2	0.028776	63.32	By matching	By matching	By matching	By matching	By MS/MS	By matching	By matching	By matching
AIGVSNFNK	LVDAGLVKAIGVSNFN	IGVSNFNKDQIESILN	K	A	I	N	K	D	1	0	2	0	0	0	0	1	0	1	0	1	0	1	0	1	0	0	0	1	0	9	0	948.503	ACN11078.1;ACI67446.1;ACI69471.1	ACN11078.1	156	164	yes	no	2	0.052155	55.064	By matching	By matching	By matching	By matching	By matching	By matching	By matching	By matching
AIHSWLTR	DGHSYSPKAIHSWLTR	AIHSWLTRVMYNRRSK	K	A	I	T	R	V	1	1	0	0	0	0	0	0	1	1	1	0	0	0	0	1	1	1	0	0	0	8	0	982.535	ACI67450.1;ACI69686.1;ACI66930.1;ACI66076.1	ACI67450.1	124	131	yes	no	2	0.00044157	136.27	By MS/MS	By MS/MS	By MS/MS	By MS/MS	By matching	By MS/MS	By MS/MS	By matching
AIIIFVPVPQLK	IEVGGSRKAIIIFVPV	FVPVPQLKSFQKIQVR	K	A	I	L	K	S	1	0	0	0	0	1	0	0	0	3	1	1	0	1	2	0	0	0	0	2	0	12	0	1336.85	ACI67293.1;ACI66314.1;ACI34164.1;ACH70774.1;ACI66988.1;ACI66768.1;ACN12304.1;ACN09957.1	ACI67293.1	59	70	yes	no	2	0.00013625	113.93	By MS/MS	By MS/MS	By matching	By MS/MS	By MS/MS	By MS/MS	By MS/MS	By MS/MS
AILLGPPGAGK	SDVKKGIRAILLGPPG	LGPPGAGKGTQAPRLA	R	A	I	G	K	G	2	0	0	0	0	0	0	3	0	1	2	1	0	0	2	0	0	0	0	0	0	11	0	992.602	ACM09766.1	ACM09766.1	20	30	no	no	2	0.0093118	78.939	By matching	By matching	By matching	By matching	By MS/MS	By matching	By matching	By MS/MS
AILLSVPLLVVDNK	EEAVERFRAILLSVPL	PLLVVDNKQEIAEAQQ	R	A	I	N	K	Q	1	0	1	1	0	0	0	0	0	1	4	1	0	0	1	1	0	0	0	3	0	14	0	1492.92	NP_001133825.1;ACI33965.1;ACN58606.1	NP_001133825.1	1114	1127	yes	no	2	0.0067706	76.759	By MS/MS	By matching	By matching	By matching	By matching	By matching	By matching	By matching
AILNYIAGK	GMKLVQTKAILNYIAG	ILNYIAGKYNLYGKDL	K	A	I	G	K	Y	2	0	1	0	0	0	0	1	0	2	1	1	0	0	0	0	0	0	1	0	0	9	0	961.56	NP_001134227.1;ACI66699.1	NP_001134227.1	55	63	yes	no	2	1.1595e-06	195.06	By MS/MS	By MS/MS	By matching	By matching	By MS/MS	By matching	By MS/MS	By MS/MS
AILPEADVELDMPLIEVR	EYGCQREKAILPEADV	DMPLIEVRVGDDFELK	K	A	I	V	R	V	2	1	0	2	0	0	3	0	0	2	3	0	1	0	2	0	0	0	0	2	0	18	0	2022.07	NP_001167116.1;ACN10868.1;ACN60205.1	NP_001167116.1	516	533	yes	no	2	3.2016e-05	123.59	By matching	By matching	By matching	By matching	By matching	By MS/MS	By matching	By matching
AILVDLEPGTMDSVR	SGNKFVPRAILVDLEP	PGTMDSVRSGPFGQLF	R	A	I	V	R	S	1	1	0	2	0	0	1	1	0	1	2	0	1	0	1	1	1	0	0	2	0	15	0	1614.83	NP_001167344.1;ACN11433.1	NP_001167344.1	63	77	no	no	2	1.7386e-18	209.39	By MS/MS	By MS/MS	By MS/MS	By MS/MS	By MS/MS	By MS/MS	By MS/MS	By MS/MS
AINAEVVACSVDSQFTHLAWINTPR	SDRVHEFRAINAEVVA	LAWINTPRKQGGLGPM	R	A	I	P	R	K	4	1	2	1	1	1	1	0	1	2	1	0	0	1	1	2	2	1	0	3	0	25	0	2798.38	ACI67534.1	ACI67534.1	131	155	yes	yes	3	1.9119e-17	175.33	By MS/MS	By MS/MS	By MS/MS	By MS/MS	By MS/MS	By MS/MS	By MS/MS	By MS/MS
AINPENGFFGVAPGTSLK	FDSQGKLRAINPENGF	VAPGTSLKTNPHAMAT	R	A	I	L	K	T	2	0	2	0	0	0	1	3	0	1	1	1	0	2	2	1	1	0	0	1	0	18	0	1817.93	ACN11110.1;ACI33922.1;NP_001117114.1;AAZ73233.2	ACI33922.1	334	351	no	no	2	3.6868e-20	211.67	By MS/MS	By MS/MS	By MS/MS	By MS/MS	By MS/MS	By MS/MS	By MS/MS	By MS/MS
AINQGGLTSLAIR	YQVEYAFKAINQGGLT	GLTSLAIRGQDCAVVV	K	A	I	I	R	G	2	1	1	0	0	1	0	2	0	2	2	0	0	0	0	1	1	0	0	0	0	13	0	1312.75	ACI70006.1;ACI66033.1;ACH70967.1;ACI69778.1;ACI69799.1;ACI67796.1	ACI70006.1	31	43	yes	no	2	0.00047951	104.41	By matching	By MS/MS	By matching	By matching	By MS/MS	By MS/MS	By matching	By matching
AINQGGLTSVAVR	YQVEYAFKAINQGGLT	GLTSVAVRGKDCAVVV	K	A	I	V	R	G	2	1	1	0	0	1	0	2	0	1	1	0	0	0	0	1	1	0	0	2	0	13	0	1284.71	ADM16303.1;ACM08640.1;ACI66289.1;ACI67177.1;ACH70968.1	ADM16303.1	31	43	yes	no	2	7.2779e-11	188.48	By MS/MS	By MS/MS	By MS/MS	By MS/MS	By MS/MS	By MS/MS	By MS/MS	By MS/MS
AIPTATVFYPSDGVSTEK	LEDIAMFRAIPTATVF	SDGVSTEKAVELAANT	R	A	I	E	K	A	2	0	0	1	0	0	1	1	0	1	0	1	0	1	2	2	3	0	1	2	0	18	0	1881.94	ACN11355.1	ACN11355.1	440	457	yes	yes	2	1.6995e-09	168.16	By MS/MS	By MS/MS	By MS/MS	By MS/MS	By MS/MS	By MS/MS	By MS/MS	By MS/MS
AIPTCTLFYPSDGVSTER	LEDIAMFRAIPTCTLF	SDGVSTERSVELAANT	R	A	I	E	R	S	1	1	0	1	1	0	1	1	0	1	1	0	0	1	2	2	3	0	1	1	0	18	0	2012.95	NP_001134006.1;ACI34298.1	NP_001134006.1	443	460	yes	no	2;3	1.0775e-28	239.75	By MS/MS	By MS/MS	By MS/MS	By MS/MS	By MS/MS	By MS/MS	By MS/MS	By MS/MS
AIQTLQMELQQIMK	TAGDHPARAIQTLQME	MELQQIMKGNYSSFMQ	R	A	I	M	K	G	1	0	0	0	0	4	1	0	0	2	2	1	2	0	0	0	1	0	0	0	0	14	0	1673.88	NP_001133738.1;ACI33812.1	NP_001133738.1	308	321	yes	no	2	4.4154e-16	165.86	By matching	By matching	By matching	By matching	By matching	By matching	By matching	By matching
AISFVGSNQAGEYIYER	ICDHPAIKAISFVGSN	AGEYIYERGSKNGKRV	K	A	I	E	R	G	2	1	1	0	0	1	2	2	0	2	0	0	0	1	0	2	0	0	2	1	0	17	0	1902.91	NP_001136188.1;ACI34215.1;ACI34202.1;ACN58716.1	NP_001136188.1	246	262	no	no	2	9.5143e-49	273.52	By MS/MS	By MS/MS	By MS/MS	By MS/MS	By MS/MS	By MS/MS	By MS/MS	By MS/MS
AISGVHTVR	HGKSTVVKAISGVHTV	ISGVHTVRFKNELERN	K	A	I	V	R	F	1	1	0	0	0	0	0	1	1	1	0	0	0	0	0	1	1	0	0	2	0	9	0	938.53	NP_001167139.1;ACN10919.1	NP_001167139.1	60	68	yes	no	2	0.0013812	112.11	By matching	By matching	By matching	By matching	By matching	By MS/MS	By matching	By matching
AISIGDPLLEATR	EEVVKRTKAISIGDPL	DPLLEATRMGALITRQ	K	A	I	T	R	M	2	1	0	1	0	0	1	1	0	2	2	0	0	0	1	1	1	0	0	0	0	13	0	1354.75	NP_001133574.1;ACN10881.1;ACI33507.1	NP_001133574.1	324	336	yes	no	2	7.9209e-11	187.62	By MS/MS	By MS/MS	By matching	By MS/MS	By MS/MS	By MS/MS	By matching	By MS/MS
AISNHFVSATTSSLK	TAAQLILKAISNHFVS	SATTSSLKNIYFVLFD	K	A	I	L	K	N	2	0	1	0	0	0	0	0	1	1	1	1	0	1	0	4	2	0	0	1	0	15	0	1561.81	ACM08922.1;ACI33732.1	ACM08922.1	332	346	yes	no	2;3	3.2892e-08	156.72	By MS/MS	By matching	By matching	By matching	By MS/MS	By MS/MS	By MS/MS	By MS/MS
AITDVVNIGIGGSDLGPLMVTEALKPYSK	EWKGFSGKAITDVVNI	EALKPYSKGGPNVWFV	K	A	I	S	K	G	2	0	1	2	0	0	1	4	0	3	3	2	1	0	2	2	2	0	1	3	0	29	1	2957.58	ACN10743.1	ACN10743.1	147	175	yes	yes	3	1.132e-14	145.66	By MS/MS	By MS/MS	By MS/MS	By MS/MS	By MS/MS	By MS/MS	By MS/MS	By MS/MS
AITGASLAEIMAK	RRAVKFQRAITGASLA	SLAEIMAKRNQKPEVR	R	A	I	A	K	R	4	0	0	0	0	0	1	1	0	2	1	1	1	0	0	1	1	0	0	0	0	13	0	1274.69	AGH92608.1;ACI66668.1	AGH92608.1	81	93	yes	no	2	2.4366e-20	228.61	By MS/MS	By MS/MS	By MS/MS	By MS/MS	By MS/MS	By MS/MS	By MS/MS	By MS/MS
AITGLQSFTVNN	IHALILGKAITGLQSF	LQSFTVNN________	K	A	I	N	N	-	1	0	2	0	0	1	0	1	0	1	1	0	0	1	0	1	2	0	0	1	0	12	0	1263.65	ACI33980.1	ACI33980.1	430	441	yes	yes	2	0.00064666	101.32	By matching	By matching	By MS/MS	By MS/MS	By MS/MS	By MS/MS	By MS/MS	By matching
AITIAGTPQSIIECVK	MLPNSTERAITIAGTP	QSIIECVKQICVVMLE	R	A	I	V	K	Q	2	0	0	0	1	1	1	1	0	4	0	1	0	0	1	1	2	0	0	1	0	16	0	1699.92	ACI34263.1;NP_001133381.1;ACI33123.1	ACI34263.1	145	160	yes	no	2	2.1188e-09	173.71	By MS/MS	By matching	By matching	By MS/MS	By MS/MS	By MS/MS	By MS/MS	By MS/MS
AITLEDPNIK	LFLSKKKRAITLEDPN	TLEDPNIKYALKLIDK	R	A	I	I	K	Y	1	0	1	1	0	0	1	0	0	2	1	1	0	0	1	0	1	0	0	0	0	10	0	1112.61	ACI69228.1;ACI33240.1	ACI69228.1	31	40	yes	no	2	0.014733	73.499	By MS/MS	By MS/MS	By MS/MS	By matching	By matching	By matching	By MS/MS	By MS/MS
AITVFSPDGHLFQVEYAQEAVK	________________	EYAQEAVKKGSTAVGI	R	A	I	V	K	K	3	0	0	1	0	2	2	1	1	1	1	1	0	2	1	1	1	0	1	3	0	22	0	2448.23	AHG98248.1;ACI68156.1;ACH70970.1;AHG98250.1;AHG98247.1;ACM09389.1;ACH70969.1;AHG98249.1;ACM08636.1;ACI69314.1;ACI67628.1;ACI68854.1	AHG98248.1	8	29	yes	no	2;3	4.5875e-20	176.46	By MS/MS	By MS/MS	By MS/MS	By MS/MS	By MS/MS	By MS/MS	By MS/MS	By MS/MS
AIVAIENPADVCVISSR	EKLLLAARAIVAIENP	DVCVISSRNTGQRAVL	R	A	I	S	R	N	3	1	1	1	1	0	1	0	0	3	0	0	0	0	1	2	0	0	0	3	0	17	0	1812.94	NP_001134397.1;B5DGB6.1;ACI70158.1;ACI68951.1;ACI67366.1;ACH70790.1;ADM15997.1;ACN12502.1;ACN10151.1;ACI68848.1;ACN10574.1	NP_001134397.1	64	80	yes	no	2;3	2.2293e-49	283.22	By MS/MS	By MS/MS	By MS/MS	By MS/MS	By MS/MS	By MS/MS	By MS/MS	By MS/MS
AIVDCGFEHPSEVQHECIPQAILGMDILCQAK	LLKPELLRAIVDCGFE	MDILCQAKSGMGKTAV	R	A	I	A	K	S	3	0	0	2	3	3	3	2	2	4	2	1	1	1	2	1	0	0	0	2	0	32	0	3664.71	ACN58701.1;NP_001134851.1;NP_001133080.1;ACN12648.1;ACN10290.1;ACM09195.1;ACI69146.1;ACH70654.1	ACN58701.1	53	84	yes	no	4	0.015725	38.986	By matching	By MS/MS	By MS/MS	By MS/MS	By matching	By matching	By MS/MS	By MS/MS
AIVDCIISIIEENPESK	DGGFEYKRAIVDCIIS	IEENPESKETGLAHLC	R	A	I	S	K	E	1	0	1	1	1	0	3	0	0	5	0	1	0	0	1	2	0	0	0	1	0	17	0	1928.98	NP_001133706.1;ACI33742.1	NP_001133706.1	416	432	yes	no	2;3	1.8855e-11	156.11	By MS/MS	By MS/MS	By MS/MS	By MS/MS	By MS/MS	By MS/MS	By MS/MS	By MS/MS
AIVHGVIAGVPIPFPIPIEDGCK	AVESQTSKAIVHGVIA	IPIEDGCKSGIECPIQ	K	A	I	C	K	S	2	0	0	1	1	0	1	3	1	5	0	1	0	1	4	0	0	0	0	3	0	23	0	2398.31	NP_001134062.1;ACN12483.1;ACN10132.1;ACM09758.1;ACM09252.1;ACM09246.1;ACM08653.1;ACI66091.1;ACM08223.1	NP_001134062.1	73	95	yes	no	3	4.9319e-06	106.75	By MS/MS	By matching	By matching	By MS/MS	By matching	By MS/MS	By MS/MS	By MS/MS
AIVICPTDEDLK	PFEGFQRKAIVICPTD	CPTDEDLKERTLKRTD	K	A	I	L	K	E	1	0	0	2	1	0	1	0	0	2	1	1	0	0	1	0	1	0	0	1	0	12	0	1372.69	NP_001167405.1;ACN10908.1	NP_001167405.1	610	621	yes	no	2	0.0052278	82.494	By matching	By matching	By matching	By matching	By matching	By matching	By matching	By MS/MS
AIVNAATLTGAMDVALGSAATGVFTNSDWLWEQLHK	YAHSFNPRAIVNAATL	WLWEQLHKASVVTGDR	R	A	I	H	K	A	7	0	2	2	0	1	1	3	1	1	4	1	1	1	0	2	4	2	0	3	0	36	0	3757.88	NP_001133791.1;ACI33908.1	NP_001133791.1	383	418	yes	no	4	0.039667	26.92	By matching	By matching	By matching	By matching	By matching	By matching	By matching	By matching
AIVPIITGSDVPK	GSKVFWFRAIVPIITG	ITGSDVPKEKMDSAME	R	A	I	P	K	E	1	0	0	1	0	0	0	1	0	3	0	1	0	0	2	1	1	0	0	2	0	13	0	1308.77	ACI66470.1;ACI69297.1;ACI67154.1;ACI33850.1;ACI67282.1;ACI67968.1	ACI66470.1	120	132	yes	no	2	1.1142e-06	153.49	By MS/MS	By MS/MS	By MS/MS	By MS/MS	By MS/MS	By MS/MS	By MS/MS	By MS/MS
AIWNVINWENVSER	NVRPDYVKAIWNVINW	NWENVSERLQAAKK__	K	A	I	E	R	L	1	1	3	0	0	0	2	0	0	2	0	0	0	0	0	1	0	2	0	2	0	14	0	1728.86	ACN12619.1;ACN10263.1	ACN12619.1	207	220	yes	no	2	1.6152e-18	214.58	By MS/MS	By MS/MS	By MS/MS	By MS/MS	By MS/MS	By MS/MS	By MS/MS	By MS/MS
AIYQATYR	EACDLGRRAIYQATYR	AIYQATYRDAYSGGQV	R	A	I	Y	R	D	2	1	0	0	0	1	0	0	0	1	0	0	0	0	0	0	1	0	2	0	0	8	0	984.503	ACH85299.1;AGH92509.1;ACM09015.1;ACM08758.1;ACM08263.1;ADM16042.1;ACI67172.1	ACH85299.1	224	231	yes	no	2	0.068195	51.059	By matching	By matching	By matching	By MS/MS	By matching	By matching	By matching	By MS/MS
AKDLDPIQK	LSAVLFNRAKDLDPIQ	KDLDPIQKLFLDKIRD	R	A	K	Q	K	L	1	0	0	2	0	1	0	0	0	1	1	2	0	0	1	0	0	0	0	0	0	9	1	1026.57	ACN12338.1;ACN09991.1;ACI66451.1;ACI67329.1;ACN12405.1;ACN10058.1;ACI66296.1	ACN12338.1	35	43	no	no	2	0.061639	81.017	By matching	By matching	By matching	By MS/MS	By matching	By matching	By matching	By matching
AKEAEAESIDK	LFGIRAKRAKEAEAES	AEAESIDKKK______	R	A	K	D	K	K	3	0	0	1	0	0	3	0	0	1	0	2	0	0	0	1	0	0	0	0	0	11	1	1189.58	NP_001134763.1;ACN12432.1;ACN10085.1;ACI68750.1;ACH70813.1	NP_001134763.1	199	209	yes	no	2	0.00021859	150.51	By matching	By matching	By MS/MS	By matching	By matching	By matching	By matching	By matching
AKEAEAESIDKK	LFGIRAKRAKEAEAES	EAESIDKKK_______	R	A	K	K	K	K	3	0	0	1	0	0	3	0	0	1	0	3	0	0	0	1	0	0	0	0	0	12	2	1317.68	NP_001134763.1;ACN12432.1;ACN10085.1;ACI68750.1;ACH70813.1	NP_001134763.1	199	210	yes	no	2	0.00014386	161.25	By matching	By matching	By MS/MS	By matching	By matching	By matching	By matching	By matching
AKFEELNMDLFR	DFSETLTRAKFEELNM	ELNMDLFRSTMKPVQK	R	A	K	F	R	S	1	1	1	1	0	0	2	0	0	0	2	1	1	2	0	0	0	0	0	0	0	12	1	1511.74	NP_001135114.1;ACI33778.1	NP_001135114.1	323	334	yes	no	2;3	1.6384e-23	252.37	By MS/MS	By MS/MS	By MS/MS	By MS/MS	By MS/MS	By MS/MS	By MS/MS	By MS/MS
AKHEILLISAEQDK	GTKEGLEKAKHEILLI	LISAEQDKRAVERVNI	K	A	K	D	K	R	2	0	0	1	0	1	2	0	1	2	2	2	0	0	0	1	0	0	0	0	0	14	1	1593.87	NP_001167124.1;ACN10888.1	NP_001167124.1	206	219	yes	no	3	0.02752	59.884	By matching	By MS/MS	By matching	By MS/MS	By matching	By matching	By matching	By matching
AKIEPVVEEMR	RTEMDAFRAKIEPVVE	EPVVEEMRAKVAVNVE	R	A	K	M	R	A	1	1	0	0	0	0	3	0	0	1	0	1	1	0	1	0	0	0	0	2	0	11	1	1299.69	ACI69572.1	ACI69572.1	139	149	yes	yes	2	0.00038653	146.36	By MS/MS	By MS/MS	By MS/MS	By MS/MS	By MS/MS	By MS/MS	By MS/MS	By MS/MS
AKPADAEMLR	AEEVKQLKAKPADAEM	PADAEMLRVYALFKQA	K	A	K	L	R	V	3	1	0	1	0	0	1	0	0	0	1	1	1	0	1	0	0	0	0	0	0	10	1	1100.56	ACN12700.1;ACN12317.1;ACN10340.1;ACN09970.1;ACI70022.1;ACI69659.1;ACI69594.1;ACI68752.1;ACI68322.1;ACI67542.1;ADM15953.1;ACN12307.1;ACN09960.1;ACI69030.1	ACN12700.1	18	27	no	no	2	0.0048285	119.27	By matching	By matching	By matching	By matching	By MS/MS	By matching	By MS/MS	By matching
AKPFPDGLAEDIEK	KHNRLYMRAKPFPDGL	GLAEDIEKGDVSPRQE	R	A	K	E	K	G	2	0	0	2	0	0	2	1	0	1	1	2	0	1	2	0	0	0	0	0	0	14	1	1528.78	ACN10751.1;ACN11125.1;ACN58590.1	ACN10751.1	606	619	yes	no	2	0.050143	76.358	By matching	By matching	By matching	By matching	By matching	By matching	By matching	By matching
AKWDAWEK	GMLDFTGKAKWDAWEK	AKWDAWEKEKGKSQED	K	A	K	E	K	E	2	0	0	1	0	0	1	0	0	0	0	2	0	0	0	0	0	2	0	0	0	8	1	1032.5	ACN12700.1;ACN12317.1;ACN10340.1;ACN09970.1;ACI70022.1;ACI69659.1;ACI69594.1;ACI68752.1;ACI68322.1;ACI67542.1;ADM15953.1;ACN12307.1;ACN09960.1;ACI69030.1	ACN12700.1	54	61	no	no	2	0.027774	91.636	By matching	By MS/MS	By matching	By MS/MS	By matching	By MS/MS	By matching	By MS/MS
ALAAQTPQMGVIEGLHGAAYK	TSRVKMDKALAAQTPQ	GLHGAAYKNTLSNSLY	K	A	L	Y	K	N	5	0	0	0	0	2	1	3	1	1	2	1	1	0	1	0	1	0	1	1	0	21	0	2125.1	ACH70840.1	ACH70840.1	162	182	yes	yes	3	0.0016634	66.606	By MS/MS	By MS/MS	By MS/MS	By MS/MS	By MS/MS	By MS/MS	By MS/MS	By MS/MS
ALADLSDTLEK	ADPLKVERALADLSDT	DLSDTLEKLENMFLKR	R	A	L	E	K	L	2	0	0	2	0	0	1	0	0	0	3	1	0	0	0	1	1	0	0	0	0	11	0	1174.61	ACI68983.1;ACI34093.1	ACI68983.1	142	152	yes	no	2	8.5062e-05	140.78	By MS/MS	By MS/MS	By MS/MS	By matching	By matching	By matching	By matching	By matching
ALAEASEDTILK	EEQEKIAKALAEASED	ASEDTILK________	K	A	L	L	K	-	3	0	0	1	0	0	2	0	0	1	2	1	0	0	0	1	1	0	0	0	0	12	0	1259.66	ACM08924.1;ACI68551.1;ACI68308.1	ACM08924.1	60	71	yes	no	2	8.3248e-13	214.04	By MS/MS	By MS/MS	By MS/MS	By MS/MS	By MS/MS	By MS/MS	By MS/MS	By MS/MS
ALAFLVQEGYEDNIVIAHDIHTK	PSDSQRVKALAFLVQE	IAHDIHTKNRLTKYGG	K	A	L	T	K	N	3	0	1	2	0	1	2	1	2	3	2	1	0	1	0	0	1	0	1	2	0	23	0	2595.33	NP_001135294.1;B5X4Y9.1;ACI34370.1	NP_001135294.1	280	302	yes	no	3;4	2.4827e-07	111.57	By matching	By matching	By matching	By MS/MS	By matching	By matching	By MS/MS	By MS/MS
ALAGCDLLTISPSLLGELSK	FRNTGEVKALAGCDLL	SLLGELSKDHSTVTPM	K	A	L	S	K	D	2	0	0	1	1	0	1	2	0	1	6	1	0	0	1	3	1	0	0	0	0	20	0	2057.11	NP_001139898.1;ACM09807.1;ACM08564.1	NP_001139898.1	236	255	yes	no	2;3	2.7018e-11	163.45	By MS/MS	By MS/MS	By MS/MS	By MS/MS	By MS/MS	By MS/MS	By MS/MS	By MS/MS
ALAMGYKPK	VLIMSEEKALAMGYKP	LAMGYKPKAYLRDFVF	K	A	L	P	K	A	2	0	0	0	0	0	0	1	0	0	1	2	1	0	1	0	0	0	1	0	0	9	1	977.537	ACN10637.1	ACN10637.1	326	334	yes	yes	2	0.015167	101.54	By MS/MS	By MS/MS	By matching	By MS/MS	By matching	By MS/MS	By matching	By matching
ALAPELAQSHIR	TALLGLTRALAPELAQ	ELAQSHIRVNCVAPGV	R	A	L	I	R	V	3	1	0	0	0	1	1	0	1	1	2	0	0	0	1	1	0	0	0	0	0	12	0	1304.72	NP_001134438.1;ACI67513.1	NP_001134438.1	199	210	yes	no	2	8.2811e-05	124.38	By MS/MS	By MS/MS	By MS/MS	By MS/MS	By MS/MS	By MS/MS	By MS/MS	By MS/MS
ALASLMTYK	EVSVDEVKALASLMTY	LASLMTYKCAVVDVPF	K	A	L	Y	K	C	2	0	0	0	0	0	0	0	0	0	2	1	1	0	0	1	1	0	1	0	0	9	0	996.531	ACI33099.1;NP_001117025.1;CAD58715.1;CAD58716.1;ACN58706.1;ACN10920.1;NP_001117108.1;CAD58714.1;ACI32916.1;CAD89353.1	NP_001117108.1	144	152	no	no	2	3.0442e-06	190.02	By MS/MS	By MS/MS	By MS/MS	By MS/MS	By MS/MS	By MS/MS	By MS/MS	By MS/MS
ALASVDIGSLICNVGAGGGAAPAAAGGAAPAADAPVKEEK	FWPSLFSKALASVDIG	DAPVKEEKKEEKKEES	K	A	L	E	K	K	13	0	1	2	1	0	2	7	0	2	2	2	0	0	3	2	0	0	0	3	0	40	1	3573.81	ACN12471.1;ACN10120.1;ACI66209.1;ACH71045.1	ACN12471.1	50	89	yes	no	3;4;5	3.4335e-54	199.65	By MS/MS	By MS/MS	By MS/MS	By MS/MS	By MS/MS	By MS/MS	By MS/MS	By MS/MS
ALASVDIGSLICNVGAGGGAAPAAGGAAPAADAPAK	FWPSLFSKALASVDIG	PAADAPAKEEEKKEEK	K	A	L	A	K	E	13	0	1	2	1	0	0	7	0	2	2	1	0	0	3	2	0	0	0	2	0	36	0	3088.56	ACM09686.1;ACM08627.1;ACH71044.1;ACN12363.1;ACN10016.1	ACM09686.1	50	85	yes	no	3	9.4668e-07	72.214	By matching	By matching	By matching	By matching	By matching	By matching	By matching	By matching
ALASVDIGSLICNVGAGGGAAPAAGGAAPAADAPAKEEEK	FWPSLFSKALASVDIG	APAKEEEKKEEKKEES	K	A	L	E	K	K	13	0	1	2	1	0	3	7	0	2	2	2	0	0	3	2	0	0	0	2	0	40	1	3603.78	ACM09686.1;ACM08627.1;ACH71044.1;ACN12363.1;ACN10016.1	ACM09686.1	50	89	yes	no	3;4	8.9502e-25	147.31	By MS/MS	By matching	By MS/MS	By MS/MS	By MS/MS	By matching	By MS/MS	By MS/MS
ALAYGFNPEHVK	STEWGAPKALAYGFNP	GFNPEHVKEGLYGSKI	K	A	L	V	K	E	2	0	1	0	0	0	1	1	1	0	1	1	0	1	1	0	0	0	1	1	0	12	0	1344.68	NP_001133645.1;ACI33628.1	NP_001133645.1	209	220	yes	no	2	6.2429e-05	128.36	By MS/MS	By MS/MS	By matching	By MS/MS	By MS/MS	By MS/MS	By MS/MS	By MS/MS
ALCIINPGNPTGQVQSR	ARKHCNPKALCIINPG	PTGQVQSRQCIEDVIR	K	A	L	S	R	Q	1	1	2	0	1	2	0	2	0	2	1	0	0	0	2	1	1	0	0	1	0	17	0	1823.93	NP_001133370.1;ACI33102.1	NP_001133370.1	302	318	yes	no	2	4.0659e-37	243.99	By matching	By matching	By matching	By matching	By matching	By matching	By matching	By MS/MS
ALCIITGASK	PDAKDLGRALCIITGA	CIITGASKGFGRTIAK	R	A	L	S	K	G	2	0	0	0	1	0	0	1	0	2	1	1	0	0	0	1	1	0	0	0	0	10	0	1032.56	NP_001133746.1;ACI33827.1	NP_001133746.1	20	29	yes	no	2	0.00043868	128.81	By MS/MS	By MS/MS	By MS/MS	By MS/MS	By MS/MS	By MS/MS	By MS/MS	By MS/MS
ALDLFSDNAAPPELLEILNADVLK	TRGDIIARALDLFSDN	ILNADVLKKTCDDYQL	R	A	L	L	K	K	4	0	2	3	0	0	2	0	0	1	6	1	0	1	2	1	0	0	0	1	0	24	0	2580.37	ACI34364.1;ACN60302.1	ACI34364.1	266	289	yes	no	2;3	9.9256e-21	189.45	By MS/MS	By MS/MS	By MS/MS	By MS/MS	By MS/MS	By MS/MS	By MS/MS	By MS/MS
ALDLFTEAIK	LGEGDLQKALDLFTEA	DLFTEAIKLNPRVAIM	K	A	L	I	K	L	2	0	0	1	0	0	1	0	0	1	2	1	0	1	0	0	1	0	0	0	0	10	0	1119.62	NP_001133946.1;ACI34192.1	NP_001133946.1	134	143	yes	no	2	0.0010425	108.47	By MS/MS	By MS/MS	By MS/MS	By MS/MS	By MS/MS	By MS/MS	By MS/MS	By MS/MS
ALDSDWFAQTYMGR	GQIMANLKALDSDWFA	FAQTYMGRKAKVGAPA	K	A	L	G	R	K	2	1	0	2	0	1	0	1	0	0	1	0	1	1	0	1	1	1	1	0	0	14	0	1659.74	ACN10637.1	ACN10637.1	392	405	yes	yes	2	3.9713e-18	206.45	By MS/MS	By MS/MS	By MS/MS	By MS/MS	By MS/MS	By MS/MS	By MS/MS	By matching
ALDTCSPQLQAK	VSSFVSKKALDTCSPQ	CSPQLQAKFRDTELSE	K	A	L	A	K	F	2	0	0	1	1	2	0	0	0	0	2	1	0	0	1	1	1	0	0	0	0	12	0	1330.66	ACI67769.1;ACI34069.1;ACI69439.1;ADM16272.1;ACI67351.1	ACI67769.1	145	156	no	no	2	2.0481e-12	205.12	By MS/MS	By MS/MS	By MS/MS	By MS/MS	By MS/MS	By MS/MS	By MS/MS	By MS/MS
ALEDAFLAIDSR	YKDGKLQKALEDAFLA	AFLAIDSRVTTEEVIK	K	A	L	S	R	V	3	1	0	2	0	0	1	0	0	1	2	0	0	1	0	1	0	0	0	0	0	12	0	1319.67	NP_001133844.1;ACI34005.1	NP_001133844.1	90	101	yes	no	2	7.1958e-05	126.5	By matching	By matching	By MS/MS	By matching	By MS/MS	By MS/MS	By matching	By MS/MS
ALEESNYELEGK	ASYLDKVRALEESNYE	SNYELEGKIKEWYEKH	R	A	L	G	K	I	1	0	1	0	0	0	4	1	0	0	2	1	0	0	0	1	0	0	1	0	0	12	0	1380.64	CON__P13645;CON__P02535-1	CON__P13645	166	177	yes	no	2	1.0444e-06	156.08	By matching	By matching	By MS/MS	By matching	By matching	By matching	By matching	By matching
ALEFTVEGK	PGNILNWKALEFTVEG	LEFTVEGKVFIERSEF	K	A	L	G	K	V	1	0	0	0	0	0	2	1	0	0	1	1	0	1	0	0	1	0	0	1	0	9	0	992.518	NP_001117143.1;CAA67765.1	NP_001117143.1	213	221	yes	no	2	0.0056652	84.817	By matching	By MS/MS	By matching	By matching	By matching	By matching	By MS/MS	By matching
ALELDSTSK	KAMVAYEKALELDSTS	LELDSTSKEATEGIQR	K	A	L	S	K	E	1	0	0	1	0	0	1	0	0	0	2	1	0	0	0	2	1	0	0	0	0	9	0	962.492	ACI32973.1;ACH70720.1	ACI32973.1	453	461	yes	no	2	0.057819	53.124	By matching	By matching	By matching	By matching	By MS/MS	By matching	By matching	By matching
ALELDYVDLYIIEMPTAFK	PALERTLKALELDYVD	IEMPTAFKPGAEFYPK	K	A	L	F	K	P	2	0	0	2	0	0	2	0	0	2	3	1	1	1	1	0	1	0	2	1	0	19	0	2243.14	NP_001139958.1;ACM08888.1	NP_001139958.1	108	126	yes	no	2	2.8737e-07	131.48	By MS/MS	By MS/MS	By matching	By matching	By MS/MS	By matching	By matching	By matching
ALELDYVDLYIIEMPTAFKPGAEFYPK	PALERTLKALELDYVD	PGAEFYPKYEDGRYIY	K	A	L	P	K	Y	3	0	0	2	0	0	3	1	0	2	3	2	1	2	3	0	1	0	3	1	0	27	1	3132.58	NP_001139958.1;ACM08888.1	NP_001139958.1	108	134	yes	no	3	1.0914e-13	140.48	By MS/MS	By MS/MS	By MS/MS	By MS/MS	By MS/MS	By MS/MS	By MS/MS	By MS/MS
ALEMYLDLFSQPCR	________________	DLFSQPCRSVYIFAKK	M	A	L	C	R	S	1	1	0	1	1	1	1	0	0	0	3	0	1	1	1	1	0	0	1	0	0	14	0	1741.82	ACI66391.1	ACI66391.1	2	15	yes	yes	2	2.0917e-18	215.34	By MS/MS	By MS/MS	By MS/MS	By MS/MS	By MS/MS	By MS/MS	By MS/MS	By MS/MS
ALERPYTSK	LEYKFNKRALERPYTS	LERPYTSKQSWGKTYG	R	A	L	S	K	Q	1	1	0	0	0	0	1	0	0	0	1	1	0	0	1	1	1	0	1	0	0	9	1	1063.57	NP_001133567.1;ACI33492.1	NP_001133567.1	66	74	yes	no	2	0.016154	99.788	By matching	By matching	By matching	By MS/MS	By MS/MS	By MS/MS	By matching	By matching
ALETAVFGAYYNVVINLK	SDLQVAAKALETAVFG	YNVVINLKDIADESFK	K	A	L	L	K	D	3	0	2	0	0	0	1	1	0	1	2	1	0	1	0	0	1	0	2	3	0	18	0	1984.07	NP_001158793.1;ACN10483.1	NP_001158793.1	486	503	yes	no	2;3	1.4101e-14	196.22	By MS/MS	By MS/MS	By matching	By matching	By MS/MS	By MS/MS	By matching	By matching
ALETFDLDPALWGVNVQPYSGSPANFAAYTAVLNPHDR	IELLCQKRALETFDLD	AVLNPHDRIMGLDLPD	R	A	L	D	R	I	6	1	3	3	0	1	1	2	1	0	4	0	0	2	4	2	2	1	2	3	0	38	0	4116	ACI34054.1	ACI34054.1	123	160	yes	yes	3;4	1.4101e-29	170.34	By MS/MS	By MS/MS	By MS/MS	By MS/MS	By MS/MS	By MS/MS	By MS/MS	By MS/MS
ALEVAVSTALEHNR	QQKLEDKKALEVAVST	STALEHNREQMRLEQE	K	A	L	N	R	E	3	1	1	0	0	0	2	0	1	0	2	0	0	0	0	1	1	0	0	2	0	14	0	1508.79	ACI33218.1	ACI33218.1	405	418	yes	yes	2	1.2539e-05	138.55	By MS/MS	By matching	By matching	By MS/MS	By matching	By matching	By MS/MS	By MS/MS
ALFDEIVK	ILAEDKHKALFDEIVK	ALFDEIVKKFKVEYHA	K	A	L	V	K	K	1	0	0	1	0	0	1	0	0	1	1	1	0	1	0	0	0	0	0	1	0	8	0	933.517	NP_001135164.1;ACH70824.1	NP_001135164.1	85	92	yes	no	2	0.00027487	146.58	By MS/MS	By MS/MS	By MS/MS	By MS/MS	By MS/MS	By MS/MS	By MS/MS	By matching
ALFSSQYLVGYQLSCADVQLLETTLMLEEK	RYLPVFEKALFSSQYL	TTLMLEEKFPTILSKF	K	A	L	E	K	F	2	0	0	1	1	3	3	1	0	0	7	1	1	1	0	3	2	0	2	2	0	30	0	3448.71	NP_001134227.1;ACI66699.1	NP_001134227.1	124	153	yes	no	3	2.9948e-05	74.392	By matching	By matching	By matching	By matching	By matching	By MS/MS	By matching	By matching
ALGGAAGGYTVGPK	IVNSTLGKALGGAAGG	GGYTVGPKPLIDLLRQ	K	A	L	P	K	P	3	0	0	0	0	0	0	5	0	0	1	1	0	0	1	0	1	0	1	1	0	14	0	1217.64	ACI67339.1	ACI67339.1	274	287	yes	yes	2	0.0008709	94.781	By MS/MS	By MS/MS	By matching	By matching	By matching	By matching	By matching	By matching
ALGKDDFTK	CTFSVCQKALGKDDFT	LGKDDFTKIPNGVNGV	K	A	L	T	K	I	1	0	0	2	0	0	0	1	0	0	1	2	0	1	0	0	1	0	0	0	0	9	1	993.513	NP_001167410.1;ACN11006.1	NP_001167410.1	332	340	yes	no	2	0.014172	103.31	By matching	By matching	By matching	By matching	By matching	By MS/MS	By matching	By matching
ALGQAPDMFYCMK	EKSIKEAKALGQAPDM	PDMFYCMKLLEETGIC	K	A	L	M	K	L	2	0	0	1	1	1	0	1	0	0	1	1	2	1	1	0	0	0	1	0	0	13	0	1530.67	NP_001133370.1;ACI33102.1	NP_001133370.1	496	508	yes	no	2	4.4425e-05	130.19	By matching	By matching	By MS/MS	By matching	By matching	By matching	By MS/MS	By MS/MS
ALGQNPVNAEVLK	SQCGDVMRALGQNPVN	PVNAEVLKVLGNPKAE	R	A	L	L	K	V	2	0	2	0	0	1	1	1	0	0	2	1	0	0	1	0	0	0	0	2	0	13	0	1351.75	AGH92555.1;ACI69975.1;ACI67608.1;AGH92529.1;ACI70081.1	AGH92555.1	38	50	no	no	2	3.663e-11	193.28	By MS/MS	By MS/MS	By MS/MS	By MS/MS	By MS/MS	By MS/MS	By MS/MS	By MS/MS
ALIAGGGAPEIELALR	IRCLVKKRALIAGGGA	PEIELALRLAEYSRTL	R	A	L	L	R	L	4	1	0	0	0	0	2	3	0	2	3	0	0	0	1	0	0	0	0	0	0	16	0	1549.88	NP_001133482.1;ACI33323.1;ACN58702.1	NP_001133482.1	415	430	yes	no	2	9.0335e-06	134.14	By MS/MS	By MS/MS	By MS/MS	By MS/MS	By MS/MS	By MS/MS	By MS/MS	By MS/MS
ALIGWTFSEVTYNNQDGFDVLDMK	LQTATGFRALIGWTFS	GFDVLDMKDISDDDVD	R	A	L	M	K	D	1	0	2	3	0	1	1	2	0	1	2	1	1	2	0	1	2	1	1	2	0	24	0	2762.29	ACI66590.1	ACI66590.1	233	256	yes	yes	3	0.0070278	48.146	By matching	By matching	By matching	By matching	By matching	By matching	By matching	By matching
ALKDPNTFLLDHLLALKPVR	DAHRCIVRALKDPNTF	LLALKPVRFLEGELLH	R	A	L	V	R	F	2	1	1	2	0	0	0	0	1	0	6	2	0	1	2	0	1	0	0	1	0	20	2	2273.33	NP_001133172.1;ACN12766.1;ACN10401.1;ACI70144.1;ACI68356.1;ACH70876.1	NP_001133172.1	211	230	yes	no	4	4.2948e-05	106.87	By MS/MS	By MS/MS	By matching	By MS/MS	By MS/MS	By MS/MS	By MS/MS	By MS/MS
ALLEGLVQEIPEEK	GCSLSVVKALLEGLVQ	VQEIPEEKTEIYRSLL	K	A	L	E	K	T	1	0	0	0	0	1	4	1	0	1	3	1	0	0	1	0	0	0	0	1	0	14	0	1566.85	DAA64401.1	DAA64401.1	309	322	yes	yes	2	0.005329	79.652	By matching	By matching	By MS/MS	By MS/MS	By matching	By matching	By matching	By MS/MS
ALLELQLEPEDLFQTFQR	LMMNKMDRALLELQLE	DLFQTFQRIVENVNVI	R	A	L	Q	R	I	1	1	0	1	0	3	3	0	0	0	5	0	0	2	1	0	1	0	0	0	0	18	0	2189.14	ACN11358.1;NP_001133466.1;ACI33293.1;ACN10751.1;ACN11125.1;ACN58590.1	NP_001133466.1	163	180	no	no	2;3	2.436e-49	278.88	By MS/MS	By MS/MS	By MS/MS	By MS/MS	By MS/MS	By MS/MS	By MS/MS	By MS/MS
ALLEVVQSGGK	EAIKLAIKALLEVVQS	EVVQSGGKNIELAVIR	K	A	L	G	K	N	1	0	0	0	0	1	1	2	0	0	2	1	0	0	0	1	0	0	0	2	0	11	0	1099.62	AHG98248.1;ACI68156.1;ACH70970.1;AHG98250.1;AHG98247.1;ACM09389.1;ACH70969.1;ACM08637.1;AHG98249.1;ACM08636.1;ACI68854.1;ADM15990.1;ACI69434.1	AHG98248.1	196	206	yes	no	2	0.00031648	120.57	By MS/MS	By MS/MS	By MS/MS	By MS/MS	By MS/MS	By MS/MS	By MS/MS	By MS/MS
ALLLLCGGDDA	DTSGDCRKALLLLCGG	LLCGGDDA________	K	A	L	D	A	-	2	0	0	2	1	0	0	2	0	0	4	0	0	0	0	0	0	0	0	0	0	11	0	1116.55	ACN12538.1;ACN10184.1	ACN12538.1	307	317	yes	no	1;2	0.0056713	86.794	By MS/MS	By matching	By matching	By matching	By MS/MS	By matching	By matching	By MS/MS
ALLLPDYYLVTVMLSGVK	VRDGSVVRALLLPDYY	TVMLSGVKCPTFKREA	R	A	L	V	K	C	1	0	0	1	0	0	0	1	0	0	5	1	1	0	1	1	1	0	2	3	0	18	0	1994.12	ACN60284.1	ACN60284.1	148	165	yes	yes	2;3	1.6777e-20	216.29	By MS/MS	By MS/MS	By MS/MS	By MS/MS	By MS/MS	By MS/MS	By MS/MS	By MS/MS
ALMASPQMVAAVVR	THKEASRRALMASPQM	QMVAAVVRAMQNTGDM	R	A	L	V	R	A	4	1	0	0	0	1	0	0	0	0	1	0	2	0	1	1	0	0	0	3	0	14	0	1442.77	NP_001133432.1;ACI33223.1;ACI34242.1	NP_001133432.1	168	181	yes	no	2	7.3703e-06	145	By MS/MS	By MS/MS	By MS/MS	By matching	By matching	By matching	By matching	By MS/MS
ALNALCDGLMLELGK	YIQLNRPKALNALCDG	GLMLELGKALDAFEAD	K	A	L	G	K	A	2	0	1	1	1	0	1	2	0	0	5	1	1	0	0	0	0	0	0	0	0	15	0	1616.83	NP_001133128.1;ACI32915.1;ACH70740.1	NP_001133128.1	57	71	yes	no	2	8.8862e-19	214.65	By MS/MS	By MS/MS	By MS/MS	By MS/MS	By MS/MS	By MS/MS	By MS/MS	By MS/MS
ALNAPPGTAPISFNER	ILYTGSQKALNAPPGT	APISFNERACQKMFNR	K	A	L	E	R	A	3	1	2	0	0	0	1	1	0	1	1	0	0	1	3	1	1	0	0	0	0	16	0	1653.85	ACI70129.1;ACI33737.1	ACI70129.1	245	260	yes	no	2	1.5237e-27	241.39	By MS/MS	By MS/MS	By MS/MS	By MS/MS	By MS/MS	By MS/MS	By MS/MS	By MS/MS
ALNDHHVYLEGTLLKPNMVTAGHSCPK	KVLAATYKALNDHHVY	TAGHSCPKKFTPQEVG	K	A	L	P	K	K	2	0	2	1	1	0	1	2	3	0	4	2	1	0	2	1	2	0	1	2	0	27	1	3001.49	NP_001117099.1;ACI70174.1;ACI68048.1;AAD11573.1	NP_001117099.1	214	240	yes	no	3;4;5	2.2708e-26	188.32	By MS/MS	By MS/MS	By MS/MS	By MS/MS	By MS/MS	By MS/MS	By MS/MS	By MS/MS
ALNEGGYQCLPK	NRIAYGARALNEGGYQ	GGYQCLPKVTFPGGML	R	A	L	P	K	V	1	0	1	0	1	1	1	2	0	0	2	1	0	0	1	0	0	0	1	0	0	12	0	1348.64	ACI34143.1	ACI34143.1	368	379	yes	yes	2	0.00013465	114.24	By matching	By matching	By matching	By matching	By matching	By matching	By matching	By MS/MS
ALPCIVDVR	EIEALGGKALPCIVDV	LPCIVDVRDEKQIGEA	K	A	L	V	R	D	1	1	0	1	1	0	0	0	0	1	1	0	0	0	1	0	0	0	0	2	0	9	0	1041.56	ACN12769.1;ACN10404.1;NP_001135155.1;ACH70700.1	ACN12769.1	68	76	no	no	2	0.0063295	83.948	By matching	By matching	By MS/MS	By MS/MS	By matching	By matching	By MS/MS	By matching
ALPYWNDEIVPQIK	SLKDTIARALPYWNDE	DEIVPQIKQGKRVLIA	R	A	L	I	K	Q	1	0	1	1	0	1	1	0	0	2	1	1	0	0	2	0	0	1	1	1	0	14	0	1684.88	NP_001133249.1;ACI32899.1;ADM16164.1;ACI68959.1	NP_001133249.1	163	176	no	no	2	1.5363e-05	135.02	By MS/MS	By MS/MS	By MS/MS	By MS/MS	By MS/MS	By MS/MS	By MS/MS	By MS/MS
ALQASALAAWK	KLSFSYGRALQASALA	ASALAAWKGKAANKQS	R	A	L	W	K	G	5	0	0	0	0	1	0	0	0	0	2	1	0	0	0	1	0	1	0	0	0	11	0	1128.63	NP_001117099.1;ACI70174.1;ACI68048.1;AAD11573.1;ACN12448.1;ACN10100.1	NP_001117099.1	303	313	yes	no	2	2.0737e-11	211.37	By MS/MS	By MS/MS	By MS/MS	By MS/MS	By MS/MS	By MS/MS	By MS/MS	By MS/MS
ALQDPNVAAFMVEPIQGEAGVVVPDAGYLTTVR	NDIPALEKALQDPNVA	AGYLTTVRQLCTQNNV	K	A	L	V	R	Q	5	1	1	2	0	2	2	3	0	1	2	0	1	1	3	0	2	0	1	6	0	33	0	3426.75	ACI33259.1	ACI33259.1	220	252	yes	yes	3	0.00094607	51.07	By MS/MS	By MS/MS	By MS/MS	By matching	By matching	By MS/MS	By matching	By MS/MS
ALQSVGQIVGEVLK	EKSENDLKALQSVGQI	QIVGEVLKQLTEEKFI	K	A	L	L	K	Q	1	0	0	0	0	2	1	2	0	1	2	1	0	0	0	1	0	0	0	3	0	14	0	1439.83	ACH85257.1;NP_001134354.1;ACI67191.1	ACH85257.1	47	60	yes	no	2	1.6786e-05	133.25	By matching	By MS/MS	By MS/MS	By MS/MS	By MS/MS	By matching	By matching	By MS/MS
ALSDADVQKQIK	________________	ADVQKQIKHMMAFIEQ	M	A	L	I	K	H	2	0	0	2	0	2	0	0	0	1	1	2	0	0	0	1	0	0	0	1	0	12	1	1314.71	ACI68221.1;ACI33808.1	ACI68221.1	2	13	yes	no	2	0.06262	53.013	By matching	By matching	By matching	By MS/MS	By matching	By matching	By matching	By matching
ALSGWVCLVTGASR	________________	CLVTGASRGIGRGIAL	M	A	L	S	R	G	2	1	0	0	1	0	0	2	0	0	2	0	0	0	0	2	1	1	0	2	0	14	0	1475.76	NP_001134326.1;ACI67074.1	NP_001134326.1	2	15	yes	no	2	4.7306e-12	181.71	By MS/MS	By MS/MS	By MS/MS	By MS/MS	By MS/MS	By MS/MS	By MS/MS	By MS/MS
ALSNLESIPGGYNALR	EMMRNQDRALSNLESI	PGGYNALRRMYTDIQE	R	A	L	L	R	R	2	1	2	0	0	0	1	2	0	1	3	0	0	0	1	2	0	0	1	0	0	16	0	1673.87	ACN10992.1;NP_001133309.1;ACI33007.1	ACN10992.1	259	274	yes	no	2	0.00093233	94.454	By matching	By matching	By MS/MS	By MS/MS	By matching	By MS/MS	By MS/MS	By matching
ALSQLAEVEDK	EDNTALSRALSQLAEV	QLAEVEDKMETLHQEQ	R	A	L	D	K	M	2	0	0	1	0	1	2	0	0	0	2	1	0	0	0	1	0	0	0	1	0	11	0	1201.62	ACN58621.1	ACN58621.1	357	367	yes	yes	2	0.0010999	102.33	By matching	By MS/MS	By MS/MS	By MS/MS	By MS/MS	By MS/MS	By matching	By matching
ALSVPELTQQMFDAK	SRGSQQYRALSVPELT	TQQMFDAKNMMAACDP	R	A	L	A	K	N	2	0	0	1	0	2	1	0	0	0	2	1	1	1	1	1	1	0	0	1	0	15	0	1676.84	NP_001167344.1;ACN11433.1	NP_001167344.1	283	297	yes	no	2	2.9226e-07	158.89	By MS/MS	By MS/MS	By MS/MS	By MS/MS	By MS/MS	By MS/MS	By MS/MS	By MS/MS
ALTGGIAHLFK	SQKSGAVKALTGGIAH	GGIAHLFKQNKVTHVN	K	A	L	F	K	Q	2	0	0	0	0	0	0	2	1	1	2	1	0	1	0	0	1	0	0	0	0	11	0	1126.65	ACI33289.1	ACI33289.1	132	142	yes	yes	2	1.8992e-05	152.54	By MS/MS	By MS/MS	By MS/MS	By MS/MS	By MS/MS	By matching	By MS/MS	By MS/MS
ALTLNEENLGNR	DDVDSLLRALTLNEEN	NEENLGNRRIRVDIAD	R	A	L	N	R	R	1	1	3	0	0	0	2	1	0	0	3	0	0	0	0	0	1	0	0	0	0	12	0	1342.68	ACN60318.1	ACN60318.1	147	158	yes	yes	2	4.9917e-09	184.34	By matching	By MS/MS	By MS/MS	By MS/MS	By matching	By MS/MS	By matching	By MS/MS
ALTQEATLVLR	IPDDKLDRALTQEATL	QEATLVLRTMEDFKPE	R	A	L	L	R	T	2	1	0	0	0	1	1	0	0	0	3	0	0	0	0	0	2	0	0	1	0	11	0	1213.7	NP_001134479.1;ACI67690.1;ACI68753.1	NP_001134479.1	204	214	yes	no	2	1.3396e-05	153.54	By MS/MS	By MS/MS	By matching	By MS/MS	By matching	By MS/MS	By matching	By matching
ALTVPELTQQMFDSK	SRGSQQYRALTVPELT	TQQMFDSKNMMAACDP	R	A	L	S	K	N	1	0	0	1	0	2	1	0	0	0	2	1	1	1	1	1	2	0	0	1	0	15	0	1706.85	ACN12631.1;ACN11362.1;ACN10275.1	ACN12631.1	283	297	yes	no	2	1.6691e-05	131.86	By matching	By MS/MS	By matching	By MS/MS	By matching	By matching	By matching	By MS/MS
ALTVPELTQQVFDAK	SRGSQQYRALTVPELT	TQQVFDAKNMMAACDP	R	A	L	A	K	N	2	0	0	1	0	2	1	0	0	0	2	1	0	1	1	0	2	0	0	2	0	15	0	1658.89	NP_001133265.1;ACI32926.1;ABQ59661.1	NP_001133265.1	283	297	yes	no	2	2.582e-18	204.17	By MS/MS	By MS/MS	By MS/MS	By MS/MS	By MS/MS	By MS/MS	By MS/MS	By MS/MS
ALVAYYQK	AIRQSISKALVAYYQK	ALVAYYQKYVDESSKK	K	A	L	Q	K	Y	2	0	0	0	0	1	0	0	0	0	1	1	0	0	0	0	0	0	2	1	0	8	0	954.517	NP_001134097.1;ACN12420.1;ACN11417.1;ACN10073.1;ACM08397.1;ACH70747.1;ACM09220.1;ACM08724.1;ACI66218.1	NP_001134097.1	91	98	yes	no	2	0.00092171	119.56	By MS/MS	By matching	By matching	By matching	By MS/MS	By matching	By MS/MS	By MS/MS
ALVDGPCTGVK	VDVIDQNRALVDGPCT	DGPCTGVKRQSMPFKC	R	A	L	V	K	R	1	0	0	1	1	0	0	2	0	0	1	1	0	0	1	0	1	0	0	2	0	11	0	1115.56	NP_001134252.1;ACN12730.1;ACN12406.1;ACN12330.1;ACN10369.1;ACN10059.1;ACN09983.1;ACI66801.1	NP_001134252.1	36	46	yes	no	2	0.0012656	99.343	By MS/MS	By MS/MS	By MS/MS	By MS/MS	By MS/MS	By MS/MS	By MS/MS	By MS/MS
ALVGGELVQSYNYDGVDAK	SKVLTTTRALVGGELV	NYDGVDAKRIFKKA__	R	A	L	A	K	R	2	0	1	2	0	1	1	3	0	0	2	1	0	0	0	1	0	0	2	3	0	19	0	1996.97	ACI68448.1	ACI68448.1	108	126	yes	yes	2	1.1008e-66	305.63	By MS/MS	By MS/MS	By MS/MS	By MS/MS	By MS/MS	By MS/MS	By MS/MS	By MS/MS
ALVILSK	________________	KALVILSKGAEEMETV	K	A	L	S	K	G	1	0	0	0	0	0	0	0	0	1	2	1	0	0	0	1	0	0	0	1	0	7	0	742.495	ACI69371.1;ACH70628.1	ACI69371.1	6	12	yes	no	1	0.048987	76.847	By matching	By MS/MS	By matching	By matching	By matching	By matching	By MS/MS	By matching
ALVLTVDVPYTGK	RVEALGYKALVLTVDV	VDVPYTGKRRNDIRNQ	K	A	L	G	K	R	1	0	0	1	0	0	0	1	0	0	2	1	0	0	1	0	2	0	1	3	0	13	0	1374.78	NP_001134549.1;ACI67966.1	NP_001134549.1	152	164	yes	no	2	0.034274	59.116	By matching	By matching	By matching	By matching	By MS/MS	By matching	By matching	By matching
ALVPVTTEVEVPFELHR	EAAVEALKALVPVTTE	EVPFELHRYIIGQKGS	K	A	L	H	R	Y	1	1	0	0	0	0	3	0	1	0	2	0	0	1	2	0	2	0	0	4	0	17	0	1935.05	NP_001167124.1;ACN10888.1	NP_001167124.1	974	990	yes	no	2;3	3.8607e-06	140.68	By MS/MS	By MS/MS	By MS/MS	By MS/MS	By matching	By MS/MS	By MS/MS	By MS/MS
ALVTQSNTYIASR	RSTMEEMRALVTQSNT	SNTYIASRKSSKLQPN	R	A	L	S	R	K	2	1	1	0	0	1	0	0	0	1	1	0	0	0	0	2	2	0	1	1	0	13	0	1422.75	NP_001133392.1;ACI33145.1	NP_001133392.1	315	327	yes	no	2	2.8052e-07	157.33	By matching	By matching	By matching	By matching	By matching	By MS/MS	By matching	By matching
ALWPVAGPVDEVLMR	GKTGSLMKALWPVAGP	PVDEVLMRSSQYVMET	K	A	L	M	R	S	2	1	0	1	0	0	1	1	0	0	2	0	1	0	2	0	0	1	0	3	0	15	0	1651.88	NP_001158815.1;ACN10526.1	NP_001158815.1	883	897	yes	no	2	0.0069496	75.764	By matching	By matching	By matching	By matching	By matching	By MS/MS	By matching	By matching
ALWQAQQVK	HDVEELCKALWQAQQV	LWQAQQVKGKPTMIIA	K	A	L	V	K	G	2	0	0	0	0	3	0	0	0	0	1	1	0	0	0	0	0	1	0	1	0	9	0	1070.59	NP_001134006.1;ACI34298.1	NP_001134006.1	227	235	yes	no	2	0.00017207	158.07	By MS/MS	By MS/MS	By MS/MS	By MS/MS	By MS/MS	By MS/MS	By MS/MS	By MS/MS
ALYEGYSAVSDTGSHNFLHLR	TADVEGGRALYEGYSA	SHNFLHLRETVLLRKE	R	A	L	L	R	E	2	1	1	1	0	0	1	2	2	0	3	0	0	1	0	3	1	0	2	1	0	21	0	2336.12	NP_001133876.1;ACI34066.1	NP_001133876.1	638	658	yes	no	3	0.014624	48.907	By MS/MS	By matching	By matching	By matching	By MS/MS	By matching	By matching	By matching
ALYLAEAPGGYR	WPLTEVGKALYLAEAP	AEAPGGYRFYLVDKEQ	K	A	L	Y	R	F	3	1	0	0	0	0	1	2	0	0	2	0	0	0	1	0	0	0	2	0	0	12	0	1279.66	ACI66791.1	ACI66791.1	113	124	yes	yes	2	0.0095692	76.165	By MS/MS	By matching	By matching	By matching	By matching	By matching	By MS/MS	By MS/MS
AMAEALLSK	GQVMRNSKAMAEALLS	MAEALLSKGYTLVSGG	K	A	M	S	K	G	3	0	0	0	0	0	1	0	0	0	2	1	1	0	0	1	0	0	0	0	0	9	0	932.5	ACI34054.1	ACI34054.1	359	367	yes	yes	2	0.00074825	134.23	By MS/MS	By matching	By matching	By matching	By MS/MS	By matching	By matching	By MS/MS
AMEAVAAQGK	GDEETVRKAMEAVAAQ	EAVAAQGKAKK_____	K	A	M	G	K	A	4	0	0	0	0	1	1	1	0	0	0	1	1	0	0	0	0	0	0	1	0	10	0	974.486	NP_001133249.1;ACI32899.1;NP_001133202.1;NP_001133201.1;ACH70964.1;ACH70963.1;ADM16164.1;ACI68959.1	NP_001133249.1	242	251	no	no	2	0.00022887	141.91	By MS/MS	By MS/MS	By MS/MS	By MS/MS	By MS/MS	By MS/MS	By MS/MS	By MS/MS
AMETAYGSNKPSMTSAALR	QAIDLVQKAMETAYGS	SMTSAALRWMYHHSHL	K	A	M	L	R	W	4	1	1	0	0	0	1	1	0	0	1	1	2	0	1	3	2	0	1	0	0	19	1	1984.93	NP_001133222.1;ACI66369.1;ACH85262.1	NP_001133222.1	280	298	yes	no	2;3	4.2752e-10	158.45	By MS/MS	By matching	By MS/MS	By MS/MS	By MS/MS	By matching	By MS/MS	By MS/MS
AMEVDERPTEQYSDIGGLDK	TEYDSRVKAMEVDERP	SDIGGLDKQIQELVEA	K	A	M	D	K	Q	1	1	0	3	0	1	3	2	0	1	1	1	1	0	1	1	1	0	1	1	0	20	1	2252.03	NP_001134065.1;AGH92560.1;ACI66100.1	NP_001134065.1	162	181	yes	no	3	0.0024806	73.057	By matching	By matching	By matching	By matching	By matching	By matching	By matching	By matching
AMFIWYR	CSNENAYKAMFIWYRN	KAMFIWYRNKERGHNI	K	A	M	Y	R	N	1	1	0	0	0	0	0	0	0	1	0	0	1	1	0	0	0	1	1	0	0	7	0	985.484	ACI33512.1	ACI33512.1	174	180	no	no	2	0.0028735	106.76	By MS/MS	By matching	By matching	By MS/MS	By MS/MS	By matching	By matching	By matching
AMGASQVVISDLSADR	LVCLLVAKAMGASQVV	ISDLSADRLVMAKELG	K	A	M	D	R	L	3	1	0	2	0	1	0	1	0	1	1	0	1	0	0	3	0	0	0	2	0	16	0	1618.8	NP_001134990.1;ACI69762.1	NP_001134990.1	190	205	yes	no	2	1.0929e-13	195.45	By MS/MS	By MS/MS	By MS/MS	By MS/MS	By MS/MS	By MS/MS	By MS/MS	By MS/MS
AMIGFEHMFEEVPIVIK	FSAEGLKKAMIGFEHM	EEVPIVIKNSHLINVL	K	A	M	I	K	N	1	0	0	0	0	0	3	1	1	3	0	1	2	2	1	0	0	0	0	2	0	17	0	1989.01	B5RI54.1;ACH85295.1;ACM09059.1	B5RI54.1	182	198	yes	no	2	0.00074259	94.454	By matching	By matching	By matching	By matching	By matching	By MS/MS	By matching	By matching
AMPMLMSQDNEVTYLVPWSK	WIEEYISKAMPMLMSQ	TYLVPWSKVDRPPKEG	K	A	M	S	K	V	1	0	1	1	0	1	1	0	0	0	2	1	3	0	2	2	1	1	1	2	0	20	0	2339.1	NP_001134867.1;ACI69216.1	NP_001134867.1	121	140	yes	no	2	1.6155e-16	193.71	By matching	By MS/MS	By MS/MS	By MS/MS	By MS/MS	By MS/MS	By MS/MS	By MS/MS
AMQNTGDMETAR	QMVAAVVRAMQNTGDM	TGDMETARATASILHN	R	A	M	A	R	A	2	1	1	1	0	1	1	1	0	0	0	0	2	0	0	0	2	0	0	0	0	12	0	1323.55	NP_001133432.1;ACI33223.1;ACI34242.1	NP_001133432.1	182	193	yes	no	2	1.022e-06	156.52	By MS/MS	By MS/MS	By MS/MS	By MS/MS	By MS/MS	By MS/MS	By matching	By matching
AMSIQHVTSQIR	NNVPLDGRAMSIQHVT	QHVTSQIRDDNQRRPS	R	A	M	I	R	D	1	1	0	0	0	2	0	0	1	2	0	0	1	0	0	2	1	0	0	1	0	12	0	1369.71	ACN12460.1;ACN10111.1;ACN10561.1;ACI69152.1	ACN12460.1	184	195	yes	no	2	0.00038794	105.95	By matching	By matching	By MS/MS	By matching	By matching	By matching	By matching	By matching
AMVASGSELGK	LATGDMLRAMVASGSE	ASGSELGKRLKETMDA	R	A	M	G	K	R	2	0	0	0	0	0	1	2	0	0	1	1	1	0	0	2	0	0	0	1	0	11	0	1048.52	ACM09766.1	ACM09766.1	54	64	yes	yes	2	0.0013373	99.343	By matching	By matching	By matching	By matching	By matching	By matching	By MS/MS	By MS/MS
AMVCLTDFEEYAK	________________	TDFEEYAKEHLSKATW	M	A	M	A	K	E	2	0	0	1	1	0	2	0	0	0	1	1	1	1	0	0	1	0	1	1	0	13	0	1575.69	NP_001134549.1;ACI67966.1	NP_001134549.1	2	14	yes	no	2	1.67e-06	153.49	By matching	By matching	By MS/MS	By MS/MS	By matching	By MS/MS	By MS/MS	By MS/MS
AMVDEMEWAISQVDPNK	DLKCGACRAMVDEMEW	ISQVDPNKMIQTGSFR	R	A	M	N	K	M	2	0	1	2	0	1	2	0	0	1	0	1	2	0	1	1	0	1	0	2	0	17	0	1961.89	ACI67752.1	ACI67752.1	39	55	yes	yes	2	2.0913e-06	146.86	By matching	By matching	By matching	By matching	By matching	By matching	By matching	By matching
AMYEEVPEPLDETEK	GPDLAVWKAMYEEVPE	EPLDETEKNNWLSSLQ	K	A	M	E	K	N	1	0	0	1	0	0	5	0	0	0	1	1	1	0	2	0	1	0	1	1	0	15	0	1778.79	NP_001133622.1;ACI33591.1;ACN10681.1	NP_001133622.1	509	523	no	no	2	2.0305e-08	164.15	By MS/MS	By MS/MS	By MS/MS	By matching	By MS/MS	By MS/MS	By MS/MS	By MS/MS
AMYEEVPEPLDETEKNNWLSSLQAVALSSDAFFPFR	GPDLAVWKAMYEEVPE	SDAFFPFRDNVDRAKR	K	A	M	F	R	D	4	1	2	2	0	1	5	0	0	0	4	1	1	3	3	4	1	1	1	2	0	36	1	4129.96	NP_001133622.1;ACI33591.1;ACN10681.1	NP_001133622.1	509	544	no	no	3	2.7258e-07	84.481	By matching	By MS/MS	By matching	By matching	By matching	By matching	By matching	By MS/MS
ANAFVAELK	VTTLDIVRANAFVAEL	NAFVAELKGLDPARVN	R	A	N	L	K	G	3	0	1	0	0	0	1	0	0	0	1	1	0	1	0	0	0	0	0	1	0	9	0	961.523	NP_001133198.1;ACI68017.1;ACH70949.1;ACH70948.1;ACI67899.1;ACI68220.1	NP_001133198.1	177	185	no	no	2	0.00076115	133.75	By MS/MS	By MS/MS	By MS/MS	By MS/MS	By MS/MS	By MS/MS	By MS/MS	By MS/MS
ANCIDSTAAPEAVFAAEVK	GHFVISIKANCIDSTA	AVFAAEVKKMGSENMK	K	A	N	V	K	K	6	0	1	1	1	0	2	0	0	1	0	1	0	1	1	1	1	0	0	2	0	19	0	1962.94	NP_001133674.1;ACI33681.1	NP_001133674.1	266	284	yes	no	2	1.6262e-11	171.3	By MS/MS	By matching	By matching	By matching	By MS/MS	By MS/MS	By MS/MS	By MS/MS
ANFVLPEAGEFLDNVTFIELQKEEADTLVK	DHAVLEMKANFVLPEA	EEADTLVKQYNEEGRK	K	A	N	V	K	Q	3	0	2	2	0	1	5	1	0	1	4	2	0	3	1	0	2	0	0	3	0	30	1	3378.72	NP_001167405.1;ACN10908.1	NP_001167405.1	645	674	yes	no	3	6.5646e-08	95.223	By matching	By MS/MS	By matching	By MS/MS	By MS/MS	By matching	By MS/MS	By MS/MS
ANIGDAHAMGQQPITFFR	KPFTEVIKANIGDAHA	QQPITFFRQVLALCSY	K	A	N	F	R	Q	3	1	1	1	0	2	0	2	1	2	0	0	1	2	1	0	1	0	0	0	0	18	0	1972.96	NP_001133370.1;ACI33102.1	NP_001133370.1	132	149	yes	no	2;3	5.6131e-49	269.34	By MS/MS	By MS/MS	By MS/MS	By MS/MS	By MS/MS	By MS/MS	By MS/MS	By MS/MS
ANKEEFTAFLHPEEYDHMK	SDLDADLKANKEEFTA	PEEYDHMKDIVVLETM	K	A	N	M	K	D	2	0	1	1	0	0	4	0	2	0	1	2	1	2	1	0	1	0	1	0	0	19	1	2335.06	B5X4E0.1;ACI34171.1	B5X4E0.1	172	190	yes	no	4	0.044128	40.493	By matching	By MS/MS	By matching	By matching	By matching	By MS/MS	By matching	By matching
ANLENQIAEAEER	IDSVKGQRANLENQIA	QIAEAEERGEMAVKDA	R	A	N	E	R	G	3	1	2	0	0	1	4	0	0	1	1	0	0	0	0	0	0	0	0	0	0	13	0	1485.71	NP_001133687.1;ACN11271.1;ACI33701.1	NP_001133687.1	363	375	yes	no	2	1.0904e-27	253.06	By MS/MS	By MS/MS	By MS/MS	By MS/MS	By MS/MS	By MS/MS	By MS/MS	By MS/MS
ANLKPEAVSEVIMGHVLTAGHGQNPAR	VIKDVLKRANLKPEAV	GHGQNPARQASVAAGI	R	A	N	A	R	Q	4	1	2	0	0	1	2	3	2	1	2	1	1	0	2	1	1	0	0	3	0	27	1	2795.45	NP_001133421.1;ACI33207.1	NP_001133421.1	43	69	yes	no	3;4;5	2.5222e-19	157.53	By MS/MS	By MS/MS	By MS/MS	By MS/MS	By MS/MS	By MS/MS	By MS/MS	By MS/MS
ANLSPITVNLITVLADNGR	FFGDAMTKANLSPITV	TVLADNGRLTLTADVV	K	A	N	G	R	L	2	1	3	1	0	0	0	1	0	2	3	0	0	0	1	1	2	0	0	2	0	19	0	1980.1	ACH85351.1;ACI66030.1;ACI67343.1;ACN12535.1;ACN10181.1;ACI69818.1;ACI69423.1;ACI68940.1;ACI67352.1;ACI68057.1	ACH85351.1	88	106	no	no	2	0.0006486	88.176	By matching	By matching	By matching	By matching	By matching	By MS/MS	By matching	By matching
ANNTTFGLASGVFTR	TEEEVLKRANNTTFGL	LASGVFTRDISRAHRV	R	A	N	T	R	D	2	1	2	0	0	0	0	2	0	0	1	0	0	2	0	1	3	0	0	1	0	15	0	1554.78	NP_001133574.1;ACN10881.1;ACI33507.1	NP_001133574.1	422	436	yes	no	2	1.0741e-18	213.51	By MS/MS	By MS/MS	By MS/MS	By MS/MS	By MS/MS	By MS/MS	By MS/MS	By MS/MS
ANPFGGASHAK	AHLGTALKANPFGGAS	FGGASHAKGIVLEKVG	K	A	N	A	K	G	3	0	1	0	0	0	0	2	1	0	0	1	0	1	1	1	0	0	0	0	0	11	0	1055.51	NP_001133209.1;ACN12360.1;ACN10013.1;ACI69871.1;ACI69612.1;ACH71000.1;ACH70999.1;ACN12368.1;ACN10021.1;ACI69986.1	NP_001133209.1	38	48	yes	no	2	0.00013514	132.03	By MS/MS	By MS/MS	By MS/MS	By MS/MS	By MS/MS	By MS/MS	By MS/MS	By MS/MS
ANQLPLVIEFTEQTAPK	ADLLAFIKANQLPLVI	FTEQTAPKIFGGEIKS	K	A	N	P	K	I	2	0	1	0	0	2	2	0	0	1	2	1	0	1	2	0	2	0	0	1	0	17	0	1898.01	ACN60216.1	ACN60216.1	144	160	yes	yes	2;3	1.9978e-104	361.22	By MS/MS	By MS/MS	By MS/MS	By MS/MS	By MS/MS	By MS/MS	By MS/MS	By MS/MS
ANSDKDISYSDLK	________________	DISYSDLKALLTKSNK	M	A	N	L	K	A	1	0	1	3	0	0	0	0	0	1	1	2	0	0	0	3	0	0	1	0	0	13	1	1454.69	ACM09285.1	ACM09285.1	2	14	yes	yes	2	1.5813e-10	180.3	By matching	By MS/MS	By MS/MS	By MS/MS	By MS/MS	By MS/MS	By MS/MS	By MS/MS
ANSYTVSSVVAPSWLHR	ALTEVYAKANSYTVSS	VAPSWLHRFIIGKKGQ	K	A	N	H	R	F	2	1	1	0	0	0	0	0	1	0	1	0	0	0	1	4	1	1	1	3	0	17	0	1872.95	NP_001167124.1;ACN10888.1	NP_001167124.1	358	374	yes	no	3	0.0048559	72.662	By MS/MS	By matching	By MS/MS	By MS/MS	By MS/MS	By MS/MS	By matching	By matching
ANTFGLILDDVSLTHLTFGK	VSDDLTERANTFGLIL	LTHLTFGKEFTEAVEM	R	A	N	G	K	E	1	0	1	2	0	0	0	2	1	1	4	1	0	2	0	1	3	0	0	1	0	20	0	2161.14	NP_001133602.1;ACI33553.1	NP_001133602.1	157	176	yes	no	2;3	1.4681e-22	206.45	By MS/MS	By MS/MS	By MS/MS	By MS/MS	By MS/MS	By MS/MS	By MS/MS	By MS/MS
ANVSEAVADSVR	EKLREWMKANVSEAVA	EAVADSVRIIYGGSVT	K	A	N	V	R	I	3	1	1	1	0	0	1	0	0	0	0	0	0	0	0	2	0	0	0	3	0	12	0	1216.6	ACN12560.1;ACN10206.1;ACI68030.1;ACI68071.1	ACN12560.1	194	205	yes	no	2	6.7169e-33	273.74	By MS/MS	By MS/MS	By MS/MS	By MS/MS	By MS/MS	By MS/MS	By MS/MS	By MS/MS
ANVSEAVANSVR	DKLRQWVKANVSEAVA	EAVANSVRIIYGGSVT	K	A	N	V	R	I	3	1	2	0	0	0	1	0	0	0	0	0	0	0	0	2	0	0	0	3	0	12	0	1215.62	NP_001133174.1;ACM09835.1;ACM09737.1;ACH70887.1;ACI70188.1	NP_001133174.1	193	204	yes	no	2	2.0835e-43	301.35	By MS/MS	By MS/MS	By MS/MS	By MS/MS	By MS/MS	By MS/MS	By MS/MS	By MS/MS
ANWYFLLAR	MWITNGGKANWYFLLA	NWYFLLARTDADPKCP	K	A	N	A	R	T	2	1	1	0	0	0	0	0	0	0	2	0	0	1	0	0	0	1	1	0	0	9	0	1152.61	NP_001133108.1;ACN10798.1;ACH70703.1	NP_001133108.1	199	207	yes	no	2	1.7124e-13	223.83	By MS/MS	By MS/MS	By MS/MS	By MS/MS	By MS/MS	By MS/MS	By MS/MS	By MS/MS
ANYDNYYEK	FVFIDADKANYDNYYE	NYDNYYEKSLQLVRKG	K	A	N	E	K	S	1	0	2	1	0	0	1	0	0	0	0	1	0	0	0	0	0	0	3	0	0	9	0	1178.49	ACI67838.1	ACI67838.1	185	193	yes	yes	2	0.00016063	159.34	By MS/MS	By MS/MS	By MS/MS	By matching	By MS/MS	By MS/MS	By MS/MS	By MS/MS
ANYHKPDEK	________________	NYHKPDEKTLQGLKDI	M	A	N	E	K	T	1	0	1	1	0	0	1	0	1	0	0	2	0	0	1	0	0	0	1	0	0	9	1	1100.53	NP_001134006.1;ACI34298.1	NP_001134006.1	2	10	yes	no	2	7.9457e-06	180.09	By MS/MS	By MS/MS	By MS/MS	By MS/MS	By MS/MS	By MS/MS	By MS/MS	By MS/MS
ANYLASPPLVIAYAIAGTVR	GRVHPNTRANYLASPP	YAIAGTVRIDFDTEPI	R	A	N	V	R	I	5	1	1	0	0	0	0	1	0	2	2	0	0	0	2	1	1	0	2	2	0	20	0	2059.15	NP_001133702.1;ACI33729.1	NP_001133702.1	558	577	yes	no	2	4.509e-05	106.89	By matching	By MS/MS	By MS/MS	By MS/MS	By MS/MS	By MS/MS	By MS/MS	By MS/MS
APAAAEGFAEDWSAQPATEDWSAAPTAQATEWGGASADWS	TEAAAPSKAPAAAEGF	GGASADWS________	K	A	P	W	S	-	13	0	0	3	0	2	4	3	0	0	0	0	0	1	3	4	3	4	0	0	0	40	0	4063.74	NP_001134397.1;B5DGB6.1;ACI70158.1;ACI68951.1;ACI67366.1;ACH70790.1	NP_001134397.1	278	317	yes	no	3;4	0.022448	31.605	By matching	By matching	By MS/MS	By MS/MS	By matching	By MS/MS	By MS/MS	By matching
APAAIGPYSQAVVVDR	RKIINTSKAPAAIGPY	SQAVVVDRTMYVSGQL	K	A	P	D	R	T	4	1	0	1	0	1	0	1	0	1	0	0	0	0	2	1	0	0	1	3	0	16	0	1612.86	ACM09640.1	ACM09640.1	14	29	yes	yes	2	6.804e-06	139.08	By MS/MS	By MS/MS	By MS/MS	By MS/MS	By MS/MS	By matching	By MS/MS	By MS/MS
APAMFNIR	KKDWYDVKAPAMFNIR	APAMFNIRNIGKTLVS	K	A	P	I	R	N	2	1	1	0	0	0	0	0	0	1	0	0	1	1	1	0	0	0	0	0	0	8	0	918.475	NP_001134789.1;B5DGL6.1;ADM16028.1;ACN12266.1;ACN09919.1;ACI69899.1;ACI68885.1;ACI67043.1;ACI66415.1;ACH70890.1	NP_001134789.1	35	42	yes	no	2	0.00014405	155.51	By MS/MS	By MS/MS	By MS/MS	By MS/MS	By MS/MS	By MS/MS	By MS/MS	By MS/MS
APDMSSSEDFPSFGAPVAATNK	PWQTGSEKAPDMSSSE	APVAATNKASPWGPKR	K	A	P	N	K	A	4	0	1	2	0	0	1	1	0	0	0	1	1	2	3	4	1	0	0	1	0	22	0	2224.99	NP_001167124.1;ACN10888.1	NP_001167124.1	1252	1273	yes	no	2	2.6274e-35	220.16	By MS/MS	By MS/MS	By MS/MS	By MS/MS	By MS/MS	By MS/MS	By MS/MS	By MS/MS
APELLFRPDLIGDESEGIHEVLAFAIQK	DIGPARFRAPELLFRP	VLAFAIQKSDMDLRRT	R	A	P	Q	K	S	3	1	0	2	0	1	4	2	1	3	4	1	0	2	2	1	0	0	0	1	0	28	1	3106.63	NP_001158877.1;ACN10660.1	NP_001158877.1	258	285	yes	no	3;4	1.2078e-07	102.21	By MS/MS	By MS/MS	By matching	By MS/MS	By MS/MS	By MS/MS	By MS/MS	By MS/MS
APFDLFENK	ALLFIPRRAPFDLFEN	PFDLFENKKKKNNIKL	R	A	P	N	K	K	1	0	1	1	0	0	1	0	0	0	1	1	0	2	1	0	0	0	0	0	0	9	0	1079.53	NP_001117004.1;AGT57169.1;AAD30275.1;ACH70738.1;AGT57166.1;AGT57170.1	NP_001117004.1	336	344	no	no	2	0.0011257	120.99	By MS/MS	By MS/MS	By matching	By MS/MS	By matching	By MS/MS	By MS/MS	By matching
APGGVFSNEEIEK	ANVHIMVKAPGGVFSN	FSNEEIEKALAKHKPV	K	A	P	E	K	A	1	0	1	0	0	0	3	2	0	1	0	1	0	1	1	1	0	0	0	1	0	13	0	1375.66	ACI70129.1;ACI33737.1	ACI70129.1	164	176	yes	no	2	1.0041e-14	203.39	By MS/MS	By MS/MS	By MS/MS	By MS/MS	By MS/MS	By MS/MS	By MS/MS	By MS/MS
APHTVQMR	GGMESMSRAPHTVQMR	APHTVQMRAGVKMGDT	R	A	P	M	R	A	1	1	0	0	0	1	0	0	1	0	0	0	1	0	1	0	1	0	0	1	0	8	0	938.476	NP_001133421.1;ACI33207.1	NP_001133421.1	123	130	yes	no	2	0.077285	47.96	By matching	By matching	By matching	By matching	By matching	By matching	By matching	By MS/MS
APIDFNLQEFNVGDYIEAVLDR	TMRLWSAKAPIDFNLQ	YIEAVLDRNLAENISR	K	A	P	D	R	N	2	1	2	3	0	1	2	1	0	2	2	0	0	2	1	0	0	0	1	2	0	22	0	2537.24	NP_001167051.1;ACN10690.1	NP_001167051.1	249	270	yes	no	2;3	0.00058825	76.796	By matching	By matching	By matching	By matching	By matching	By matching	By MS/MS	By matching
APILIATDVASR	LNEFKFGKAPILIATD	IATDVASRGLDVEDVK	K	A	P	S	R	G	3	1	0	1	0	0	0	0	0	2	1	0	0	0	1	1	1	0	0	1	0	12	0	1225.7	ACN11269.1;ACN60288.1	ACN11269.1	392	403	yes	no	2	4.1808e-05	132.86	By MS/MS	By MS/MS	By MS/MS	By MS/MS	By MS/MS	By MS/MS	By MS/MS	By MS/MS
APIQYEALMQMDYLDCVLNESLR	IDTVFPNKAPIQYEAL	CVLNESLRLYPIAPRL	K	A	P	L	R	L	2	1	1	2	1	2	2	0	0	1	4	0	2	0	1	1	0	0	2	1	0	23	0	2771.3	ACI33861.1	ACI33861.1	348	370	yes	yes	2;3	2.5816e-06	108.96	By matching	By matching	By matching	By MS/MS	By MS/MS	By matching	By matching	By MS/MS
APIRPDIVNFVHTNMR	VVMPAVFKAPIRPDIV	NFVHTNMRKNSRQPYA	K	A	P	M	R	K	1	2	2	1	0	0	0	0	1	2	0	0	1	1	2	0	1	0	0	2	0	16	1	1878.99	NP_001135255.1;ACM08761.1;ACI33937.1;ACH70798.1;ACM09838.1;ACI66204.1	NP_001135255.1	30	45	yes	no	3;4	5.7039e-09	168.93	By MS/MS	By MS/MS	By MS/MS	By MS/MS	By MS/MS	By MS/MS	By MS/MS	By MS/MS
APLMMYISK	GIKNCDPKAPLMMYIS	PLMMYISKMVPTTDKG	K	A	P	S	K	M	1	0	0	0	0	0	0	0	0	1	1	1	2	0	1	1	0	0	1	0	0	9	0	1052.54	ACN11358.1;ACN58670.1;NP_001133466.1;ACI33293.1;ACN10751.1;ACN11125.1;ACN58590.1	NP_001133466.1	392	400	no	no	2	0.00025637	152.34	By MS/MS	By MS/MS	By MS/MS	By MS/MS	By MS/MS	By MS/MS	By MS/MS	By MS/MS
APLVNSWPCNPEK	LGRPLPLKAPLVNSWP	SWPCNPEKVLISHLPD	K	A	P	E	K	V	1	0	2	0	1	0	1	0	0	0	1	1	0	0	3	1	0	1	0	1	0	13	0	1510.72	ACN11110.1;ACI33922.1;NP_001117114.1;AAZ73233.2	ACI33922.1	213	225	no	no	2	3.8757e-11	193	By MS/MS	By MS/MS	By MS/MS	By MS/MS	By MS/MS	By MS/MS	By MS/MS	By MS/MS
APSIIFIDELDAIGTK	AFALAKEKAPSIIFID	ELDAIGTKRFDSEKAG	K	A	P	T	K	R	2	0	0	2	0	0	1	1	0	4	1	1	0	1	1	1	1	0	0	0	0	16	0	1701.92	NP_001134065.1;AGH92560.1;ACI66100.1	NP_001134065.1	267	282	yes	no	2	0.00015427	118.55	By MS/MS	By MS/MS	By matching	By MS/MS	By MS/MS	By MS/MS	By MS/MS	By matching
APSMQLNDAVSDVK	________________	NDAVSDVKKGIRAILL	M	A	P	V	K	K	2	0	1	2	0	1	0	0	0	0	1	1	1	0	1	2	0	0	0	2	0	14	0	1473.71	ACM09766.1	ACM09766.1	2	15	yes	yes	2	4.8786e-09	174.24	By MS/MS	By MS/MS	By MS/MS	By MS/MS	By MS/MS	By MS/MS	By MS/MS	By MS/MS
APVEAEVAIHR	MAFKDTGKAPVEAEVA	EAEVAIHRIRITLTSR	K	A	P	H	R	I	3	1	0	0	0	0	2	0	1	1	0	0	0	0	1	0	0	0	0	2	0	11	0	1190.64	NP_001134315.1;ACN12392.1;ACN12233.1;ACN10045.1;ACN09886.1;ACI67034.1;ACH70883.1	NP_001134315.1	9	19	yes	no	2	4.5011e-05	147.91	By MS/MS	By MS/MS	By MS/MS	By MS/MS	By MS/MS	By MS/MS	By MS/MS	By MS/MS
AQCPIVER	YAAKRFRKAQCPIVER	AQCPIVERLTNSMMMH	K	A	Q	E	R	L	1	1	0	0	1	1	1	0	0	1	0	0	0	0	1	0	0	0	0	1	0	8	0	971.486	ADM15920.1;ACN12179.1;ACN09832.1;ACI70016.1;ACI68342.1;ACI32985.1;ACH71011.1;ACH71010.1;ACI68452.1	ADM15920.1	65	72	yes	no	2	0.0027938	99.136	By MS/MS	By MS/MS	By MS/MS	By MS/MS	By MS/MS	By MS/MS	By MS/MS	By MS/MS
AQDAGFLSDVISFK	RSHTLAKRAQDAGFLS	LSDVISFKVPGRDMVA	R	A	Q	F	K	V	2	0	0	2	0	1	0	1	0	1	1	1	0	2	0	2	0	0	0	1	0	14	0	1496.75	ACN10637.1	ACN10637.1	255	268	yes	yes	2	2.8588e-25	226.65	By MS/MS	By MS/MS	By MS/MS	By MS/MS	By MS/MS	By MS/MS	By MS/MS	By MS/MS
AQFEEVSQK	________________	QFEEVSQKSAVHPKPV	M	A	Q	Q	K	S	1	0	0	0	0	2	2	0	0	0	0	1	0	1	0	1	0	0	0	1	0	9	0	1064.51	NP_001133363.1;ACI33093.1	NP_001133363.1	2	10	yes	no	2	0.035326	60.828	By MS/MS	By matching	By MS/MS	By matching	By matching	By matching	By matching	By matching
AQFGQPEILLGTIPGAGGTQR	DIIFAGEKAQFGQPEI	PGAGGTQRLTRAVGKS	K	A	Q	Q	R	L	2	1	0	0	0	3	1	5	0	2	2	0	0	1	2	0	2	0	0	0	0	21	0	2110.12	NP_001133128.1;ACI32915.1;ACH70740.1	NP_001133128.1	158	178	yes	no	2;3	1.2197e-17	197.4	By MS/MS	By MS/MS	By MS/MS	By matching	By MS/MS	By MS/MS	By MS/MS	By MS/MS
AQGPLEVASVAVSQASGMPAR	EAVKELRKAQGPLEVA	QASGMPARFVIHCNIP	K	A	Q	A	R	F	5	1	0	0	0	2	1	2	0	0	1	0	1	0	2	3	0	0	0	3	0	21	0	2025.03	ACM08922.1;ACI33732.1	ACM08922.1	250	270	yes	no	3	0.00021349	86.748	By MS/MS	By matching	By matching	By MS/MS	By MS/MS	By MS/MS	By MS/MS	By matching
AQGQDVSPDVYFMK	LEEEAKIKAQGQDVSP	SPDVYFMKQTIGNACG	K	A	Q	M	K	Q	1	0	0	2	0	2	0	1	0	0	0	1	1	1	1	1	0	0	1	2	0	14	0	1583.73	NP_001140074.1;ACM09512.1	NP_001140074.1	75	88	yes	no	2	4.3057e-18	205.3	By MS/MS	By MS/MS	By MS/MS	By MS/MS	By MS/MS	By MS/MS	By MS/MS	By MS/MS
AQHEQSAASFPEHIR	________________	ASFPEHIRKKRNGEQL	M	A	Q	I	R	K	3	1	0	0	0	2	2	0	2	1	0	0	0	1	1	2	0	0	0	0	0	15	0	1706.81	NP_001133751.1;ACI33838.1;ACI66148.1	NP_001133751.1	2	16	yes	no	2;3	1.666e-25	230.96	By MS/MS	By MS/MS	By MS/MS	By MS/MS	By MS/MS	By MS/MS	By MS/MS	By MS/MS
AQHPSLGIGDVAK	ADHRPKIKAQHPSLGI	LGIGDVAKKLGEQWNN	K	A	Q	A	K	K	2	0	0	1	0	1	0	2	1	1	1	1	0	0	1	1	0	0	0	1	0	13	0	1291.69	ACN11506.1;NP_001133971.1;ACN10817.1;ACI34238.1	ACN11506.1	113	125	yes	no	2	5.7076e-05	128.73	By MS/MS	By MS/MS	By MS/MS	By MS/MS	By MS/MS	By MS/MS	By MS/MS	By MS/MS
AQIAAQYSGAR	PENWRAFKAQIAAQYS	AAQYSGARLKVASSAP	K	A	Q	A	R	L	4	1	0	0	0	2	0	1	0	1	0	0	0	0	0	1	0	0	1	0	0	11	0	1134.58	ACM08681.1;ACH85278.1;NP_001135112.1;ACM09182.1;ACI33692.1;ACN12474.1;ACN10123.1;NP_001133235.1;ACH85371.1	ACM08681.1	18	28	yes	no	2	3.5799e-11	181.66	By MS/MS	By MS/MS	By MS/MS	By MS/MS	By MS/MS	By MS/MS	By MS/MS	By MS/MS
AQIDADVTVVGSGPGGYVAAIK	SVRTYSDKAQIDADVT	GGYVAAIKAAQLGFKT	K	A	Q	I	K	A	4	0	0	2	0	1	0	4	0	2	0	1	0	0	1	1	1	0	1	4	0	22	0	2087.09	ACI33289.1	ACI33289.1	37	58	yes	yes	2	6.2099e-47	262.98	By MS/MS	By matching	By matching	By MS/MS	By MS/MS	By matching	By MS/MS	By MS/MS
AQIWDTAGQER	QVDGKMIKAQIWDTAG	WDTAGQERYRAITSAY	K	A	Q	E	R	Y	2	1	0	1	0	2	1	1	0	1	0	0	0	0	0	0	1	1	0	0	0	11	0	1273.61	NP_001133884.1;ACI34076.1;ACM08790.1;ACI68958.1;NP_001134031.1;ACI34343.1	NP_001133884.1	62	72	yes	no	2	1.7688e-06	126.5	By matching	By matching	By matching	By matching	By matching	By matching	By matching	By MS/MS
AQLHDMAVATGGTVFGDEAVGIALEDIQAHDFGK	PGFGDNRKAQLHDMAV	IQAHDFGKVGEVSVTK	K	A	Q	G	K	V	6	0	0	4	0	2	2	5	2	2	2	1	1	2	0	0	2	0	0	3	0	34	0	3482.68	ACI33148.1	ACI33148.1	311	344	yes	yes	4	0.024053	34.406	By matching	By matching	By MS/MS	By MS/MS	By MS/MS	By MS/MS	By matching	By matching
AQLHDMAVATGGTVFGDEAVGIALEDIQAHDFGQVGEVSVTK	PGFGDNRKAQLHDMAV	VGEVSVTKDDTMLLKG	K	A	Q	T	K	D	6	0	0	4	0	3	3	6	2	2	2	1	1	2	0	1	3	0	0	6	0	42	0	4282.09	ACN11370.1;ACN60194.1	ACN11370.1	311	352	yes	no	4	0.0099811	38.562	By MS/MS	By MS/MS	By matching	By MS/MS	By MS/MS	By MS/MS	By matching	By matching
AQLLESMPGASTGQVVVTDHLNFWGGCR	________________	LNFWGGCRVKPKDGIN	M	A	Q	C	R	V	2	1	1	1	1	2	1	4	1	0	3	0	1	1	1	2	2	1	0	3	0	28	0	3029.45	NP_001133574.1;ACN10881.1;ACI33507.1	NP_001133574.1	2	29	yes	no	3	1.3439e-05	83.826	By MS/MS	By MS/MS	By MS/MS	By MS/MS	By matching	By MS/MS	By MS/MS	By MS/MS
AQLNIGNVLPVGTMPEGTIICCLEEKPGDR	QFIYCGKKAQLNIGNV	LEEKPGDRGKLARASG	K	A	Q	D	R	G	1	1	2	1	2	1	3	4	0	3	3	1	1	0	3	0	2	0	0	2	0	30	1	3280.63	ACI70186.1;ACI68574.1;ACN12701.1;ACN12214.1;ACN10341.1;ACN09867.1;ACI69963.1;ACH70991.1;ACH70990.1;ACI67398.1	ACI70186.1	94	123	yes	no	3	6.7343e-08	94.838	By MS/MS	By MS/MS	By MS/MS	By MS/MS	By MS/MS	By MS/MS	By MS/MS	By MS/MS
AQLTALYQAFTNTN	DPYAQDLKAQLTALYQ	YQAFTNTN________	K	A	Q	T	N	-	3	0	2	0	0	2	0	0	0	0	2	0	0	1	0	0	3	0	1	0	0	14	0	1554.77	ACI67068.1;ACI67266.1	ACI67266.1	242	255	no	no	2	0.00035435	108.66	By matching	By MS/MS	By matching	By matching	By MS/MS	By MS/MS	By matching	By MS/MS
AQLVVIAHDVDPIELVVFLPALCR	TTLVESKKAQLVVIAH	VFLPALCRKMGVPYCI	K	A	Q	C	R	K	3	1	0	2	1	1	1	0	1	2	4	0	0	1	2	0	0	0	0	5	0	24	0	2686.49	ACH85352.1;NP_001134228.1;AGH92587.1;ACN12693.1;ACN12680.1;ACN10333.1;ACN10320.1;ACI66701.1;ACH70989.1	ACH85352.1	148	171	yes	no	3	1.3394e-05	93.5	By MS/MS	By MS/MS	By matching	By MS/MS	By MS/MS	By MS/MS	By MS/MS	By MS/MS
AQMSDFDR	KIEARQKRAQMSDFDR	AQMSDFDRFKVMKAKR	R	A	Q	D	R	F	1	1	0	2	0	1	0	0	0	0	0	0	1	1	0	1	0	0	0	0	0	8	0	968.402	NP_001134252.1;ACN12730.1;ACN12406.1;ACN12330.1;ACN10369.1;ACN10059.1;ACN09983.1;ACI66801.1	NP_001134252.1	102	109	yes	no	2	0.009259	82.645	By matching	By MS/MS	By matching	By MS/MS	By matching	By MS/MS	By MS/MS	By matching
AQSEMASASDEAAR	AAKANLEKAQSEMASA	SASDEAARAEVQINID	K	A	Q	A	R	A	5	1	0	1	0	1	2	0	0	0	0	0	1	0	0	3	0	0	0	0	0	14	0	1422.6	ACI69889.1	ACI69889.1	129	142	yes	yes	2	3.05e-33	252.46	By matching	By matching	By MS/MS	By matching	By matching	By matching	By matching	By matching
AQSEMASVSDEAAR	AAKVNLEKAQSEMASV	SVSDEAARAEVQINID	K	A	Q	A	R	A	4	1	0	1	0	1	2	0	0	0	0	0	1	0	0	3	0	0	0	1	0	14	0	1450.64	ACI69016.1	ACI69016.1	129	142	yes	yes	2	0.00046705	105.63	By matching	By matching	By matching	By matching	By MS/MS	By matching	By matching	By matching
AQSGVEFATSGSSNTDTGK	VKLDLKTKAQSGVEFA	SSNTDTGKAAGNLETK	K	A	Q	G	K	A	2	0	1	1	0	1	1	3	0	0	0	1	0	1	0	4	3	0	0	1	0	19	0	1842.82	ACI33557.1;NP_001133093.1;ACH70681.1	ACI33557.1	74	92	yes	no	2	1.3724e-95	339.46	By MS/MS	By MS/MS	By MS/MS	By MS/MS	By MS/MS	By MS/MS	By MS/MS	By MS/MS
AQSLISTDR	________________	QSLISTDRNASIDILH	R	A	Q	D	R	N	1	1	0	1	0	1	0	0	0	1	1	0	0	0	0	2	1	0	0	0	0	9	0	989.514	ACN58663.1	ACN58663.1	3	11	yes	yes	2	0.045995	57.174	By MS/MS	By matching	By matching	By matching	By MS/MS	By matching	By matching	By matching
AQSYHYVTQLPVK	GIECPIQKAQSYHYVT	YVTQLPVKSEYPSIKL	K	A	Q	V	K	S	1	0	0	0	0	2	0	0	1	0	1	1	0	0	1	1	1	0	2	2	0	13	0	1532.8	NP_001134062.1;ACN12483.1;ACN10132.1;ACM09758.1;ACM09252.1;ACM09246.1;ACM08653.1;ACI66091.1	NP_001134062.1	105	117	yes	no	2;3	0.03143	79.885	By matching	By matching	By matching	By MS/MS	By matching	By matching	By matching	By matching
AQVAQAGGDTIFGK	________________	GGDTIFGKIIRKEIPA	K	A	Q	G	K	I	3	0	0	1	0	2	0	3	0	1	0	1	0	1	0	0	1	0	0	1	0	14	0	1361.69	NP_001134628.1;ACI68263.1	NP_001134628.1	8	21	yes	no	2	4.7252e-18	203.85	By MS/MS	By MS/MS	By MS/MS	By MS/MS	By MS/MS	By MS/MS	By MS/MS	By MS/MS
AQVHDIVLVGGSTR	LRDAKMDKAQVHDIVL	VLVGGSTRIPKIQKLL	K	A	Q	T	R	I	1	1	0	1	0	1	0	2	1	1	1	0	0	0	0	1	1	0	0	3	0	14	0	1450.79	ACI33977.1;NP_001133079.1;ACN10487.1;ACH70651.1;ACN11074.1	NP_001133079.1	329	342	no	no	2	1.1201e-05	140.22	By MS/MS	By MS/MS	By MS/MS	By MS/MS	By MS/MS	By MS/MS	By MS/MS	By MS/MS
AQVLPDSVAASLNK	IHPYDKIKAQVLPDSV	SVAASLNKLVVVKLNG	K	A	Q	N	K	L	3	0	1	1	0	1	0	0	0	0	2	1	0	0	1	2	0	0	0	2	0	14	0	1411.77	NP_001133758.1;ACI33847.1;ACH70772.1	NP_001133758.1	78	91	yes	no	2	0.00077155	97.45	By MS/MS	By matching	By MS/MS	By matching	By matching	By matching	By matching	By MS/MS
AQYEDIANK	DSIVAEVRAQYEDIAN	QYEDIANKSRAEAETW	R	A	Q	N	K	S	2	0	1	1	0	1	1	0	0	1	0	1	0	0	0	0	0	0	1	0	0	9	0	1050.5	NP_001133687.1;ACN11271.1;ACI33701.1	NP_001133687.1	299	307	yes	no	2	3.9825e-06	187.5	By MS/MS	By MS/MS	By MS/MS	By MS/MS	By MS/MS	By MS/MS	By MS/MS	By MS/MS
AQYEDIANR	DSIIAEVKAQYEDIAN	QYEDIANRSRAEAESM	K	A	Q	N	R	S	2	1	1	1	0	1	1	0	0	1	0	0	0	0	0	0	0	0	1	0	0	9	0	1078.5	CON__P05787	CON__P05787	265	273	no	no	2	0.0040755	86.898	By matching	By matching	By matching	By matching	By matching	By matching	By matching	By matching
AQYEEIAQR	DSIIAEVKAQYEEIAQ	QYEEIAQRSKEEAEAL	K	A	Q	Q	R	S	2	1	0	0	0	2	2	0	0	1	0	0	0	0	0	0	0	0	1	0	0	9	0	1106.54	CON__P35908	CON__P35908	360	368	no	no	2	0.00012392	163.38	By MS/MS	By matching	By matching	By matching	By matching	By matching	By matching	By matching
AQYTLPDGSTLDIGPAR	DETLETEKAQYTLPDG	TLDIGPARFRAPELLF	K	A	Q	A	R	F	2	1	0	2	0	1	0	2	0	1	2	0	0	0	2	1	2	0	1	0	0	17	0	1773.89	NP_001158877.1;ACN10660.1	NP_001158877.1	239	255	yes	no	2	0.00041377	103.39	By matching	By matching	By matching	By matching	By MS/MS	By MS/MS	By matching	By matching
ARPAPYGGLSGYGDDR	VDYYEKYRARPAPYGG	LSGYGDDRRVGSIPPP	R	A	R	D	R	R	2	2	0	2	0	0	0	4	0	0	1	0	0	0	2	1	0	0	2	0	0	16	1	1650.78	ACI34208.1	ACI34208.1	231	246	yes	yes	3	0.055804	57.288	By matching	By MS/MS	By matching	By matching	By matching	By matching	By matching	By matching
ARPEYMLPVHFYGR	RYGNPWEKARPEYMLP	LPVHFYGRVEQTAEGV	K	A	R	G	R	V	1	2	0	0	0	0	1	1	1	0	1	0	1	1	2	0	0	0	2	1	0	14	1	1734.87	NP_001167051.1;ACN10690.1	NP_001167051.1	193	206	yes	no	2;3	1.2398e-05	137.09	By MS/MS	By MS/MS	By MS/MS	By MS/MS	By MS/MS	By MS/MS	By MS/MS	By MS/MS
ARPFPDGLAEDIEK	KHNRLYMKARPFPDGL	GLAEDIEKGDVSARQE	K	A	R	E	K	G	2	1	0	2	0	0	2	1	0	1	1	1	0	1	2	0	0	0	0	0	0	14	1	1556.78	ACN11358.1;ACN58670.1;NP_001133466.1;ACI33293.1	NP_001133466.1	606	619	no	no	2	0.0037407	104.21	By matching	By MS/MS	By MS/MS	By MS/MS	By matching	By MS/MS	By matching	By matching
ARPTADADDGPPKR	KTDSDDWRARPTADAD	ADDGPPKREESTFGSR	R	A	R	K	R	E	3	2	0	3	0	0	0	1	0	0	0	1	0	0	3	0	1	0	0	0	0	14	2	1465.73	ACN60318.1	ACN60318.1	204	217	yes	yes	3	0.0012637	91.845	By matching	By matching	By MS/MS	By MS/MS	By matching	By MS/MS	By MS/MS	By MS/MS
ASAGDSEPQNRPVLIVGQLNNLAQTNWTQVK	ANVVLEFKASAGDSEP	QTNWTQVKGKLQPAVS	K	A	S	V	K	G	3	1	4	1	0	4	1	2	0	1	3	1	0	0	2	2	2	1	0	3	0	31	1	3347.72	NP_001133677.1;ACI33685.1	NP_001133677.1	10	40	yes	no	3	0.021199	38.185	By matching	By matching	By matching	By matching	By MS/MS	By matching	By matching	By matching
ASAHLQGGAK	GVFTTIDKASAHLQGG	AHLQGGAKRVIISAPS	K	A	S	A	K	R	3	0	0	0	0	1	0	2	1	0	1	1	0	0	0	1	0	0	0	0	0	10	0	938.493	ACI66269.1;ACI69846.1	ACI66269.1	107	116	yes	no	2	0.001826	99.788	By MS/MS	By MS/MS	By matching	By MS/MS	By MS/MS	By MS/MS	By MS/MS	By MS/MS
ASAILMSQKPVVVK	LRMAALRRASAILMSQ	SQKPVVVKKRRSKAAK	R	A	S	V	K	K	2	0	0	0	0	1	0	0	0	1	1	2	1	0	1	2	0	0	0	3	0	14	1	1469.86	NP_001133165.1;ACH70855.1;ACN12501.1;ACN10150.1	NP_001133165.1	114	127	yes	no	2;3	1.3876e-24	231.69	By MS/MS	By MS/MS	By MS/MS	By MS/MS	By MS/MS	By MS/MS	By MS/MS	By MS/MS
ASALLTEAR	FKVTTQQRASALLTEA	SALLTEARESVNAVLD	R	A	S	A	R	E	3	1	0	0	0	0	1	0	0	0	2	0	0	0	0	1	1	0	0	0	0	9	0	930.513	NP_001158793.1;ACN10483.1	NP_001158793.1	518	526	yes	no	2	3.3574e-06	189.18	By MS/MS	By MS/MS	By MS/MS	By MS/MS	By MS/MS	By MS/MS	By MS/MS	By MS/MS
ASATGMIIMDEVEVPEENLLPK	IEGKFSLRASATGMII	PEENLLPKVSGLGGPF	R	A	S	P	K	V	2	0	1	1	0	0	4	1	0	2	2	1	2	0	2	1	1	0	0	2	0	22	0	2385.18	ACI33980.1	ACI33980.1	261	282	yes	yes	2;3	6.8001e-15	155.53	By MS/MS	By MS/MS	By MS/MS	By MS/MS	By MS/MS	By MS/MS	By MS/MS	By MS/MS
ASCALTQVIPK	EKVWISDKASCALTQV	ALTQVIPKAHRSLIPY	K	A	S	P	K	A	2	0	0	0	1	1	0	0	0	1	1	1	0	0	1	1	1	0	0	1	0	11	0	1186.64	NP_001135239.1;ACI33755.1	NP_001135239.1	300	310	yes	no	2	0.0008594	105.36	By MS/MS	By MS/MS	By matching	By matching	By matching	By matching	By matching	By matching
ASCVFGQLPK	DWMKGDLKASCVFGQL	CVFGQLPKFEDGGLVL	K	A	S	P	K	F	1	0	0	0	1	1	0	1	0	0	1	1	0	1	1	1	0	0	0	1	0	10	0	1105.56	ACN12309.1;ACN09962.1;ACI70112.1;ACI69773.1	ACN12309.1	46	55	yes	no	2	4.3749e-07	167.93	By MS/MS	By MS/MS	By MS/MS	By MS/MS	By MS/MS	By MS/MS	By MS/MS	By MS/MS
ASDMMQYLR	PGGKINIKASDMMQYL	SDMMQYLRKSGF____	K	A	S	L	R	K	1	1	0	1	0	1	0	0	0	0	1	0	2	0	0	1	0	0	1	0	0	9	0	1113.49	ACN12229.1;ACN09882.1;ACI68511.1;ACI66108.1	ACN12229.1	131	139	yes	no	2	0.00052738	142.36	By matching	By matching	By matching	By matching	By matching	By matching	By MS/MS	By matching
ASDVFCCNESEAELLTGVAVASIEDAGR	VLDPEFYRASDVFCCN	ASIEDAGRAGQELLRR	R	A	S	G	R	A	5	1	1	2	2	0	4	2	0	1	2	0	0	1	0	3	1	0	0	3	0	28	0	2969.34	NP_001134323.1;ACI67056.1	NP_001134323.1	182	209	yes	no	3	4.3602e-08	106.93	By matching	By matching	By matching	By matching	By matching	By MS/MS	By MS/MS	By matching
ASENAIVWK	MKGKAKYKASENAIVW	SENAIVWKIKRMAGMK	K	A	S	W	K	I	2	0	1	0	0	0	1	0	0	1	0	1	0	0	0	1	0	1	0	1	0	9	0	1016.53	NP_001133612.1;ACN10781.1;ACI33569.1	NP_001133612.1	349	357	yes	no	2	0.069913	48.981	By MS/MS	By matching	By matching	By matching	By matching	By matching	By matching	By matching
ASEWVQELCPLMDGK	DVANRGLKASEWVQEL	LCPLMDGKGGGKDMSA	K	A	S	G	K	G	1	0	0	1	1	1	2	1	0	0	2	1	1	0	1	1	0	1	0	1	0	15	0	1761.81	NP_001133550.1;ACI33457.1	NP_001133550.1	916	930	yes	no	2	6.6295e-13	192.32	By matching	By matching	By matching	By MS/MS	By matching	By MS/MS	By MS/MS	By MS/MS
ASFLEDIR	GAKFNGDKASFLEDIR	ASFLEDIRKALYASKI	K	A	S	I	R	K	1	1	0	1	0	0	1	0	0	1	1	0	0	1	0	1	0	0	0	0	0	8	0	949.487	ACN10812.1	ACN10812.1	317	324	yes	yes	2	0.00041257	138.06	By MS/MS	By MS/MS	By MS/MS	By MS/MS	By MS/MS	By MS/MS	By MS/MS	By MS/MS
ASFVDVK	________________	MASFVDVKNVEPTHFE	M	A	S	V	K	N	1	0	0	1	0	0	0	0	0	0	0	1	0	1	0	1	0	0	0	2	0	7	0	764.407	ACI68909.1;ACI68160.1;ACI68567.1	ACI68909.1	2	8	yes	no	1	0.065342	54.787	By matching	By matching	By matching	By matching	By matching	By matching	By MS/MS	By matching
ASGANYSFHK	AIMQKVAKASGANYSF	GANYSFHKESNKFRDA	K	A	S	H	K	E	2	0	1	0	0	0	0	1	1	0	0	1	0	1	0	2	0	0	1	0	0	10	0	1080.5	ACI33221.1	ACI33221.1	135	144	yes	yes	2	0.00084549	112.13	By MS/MS	By MS/MS	By matching	By matching	By MS/MS	By matching	By matching	By MS/MS
ASGNFNANQDAETLYK	MAGRGSVRASGNFNAN	QDAETLYKAMKGLGTD	R	A	S	Y	K	A	3	0	3	1	0	1	1	1	0	0	1	1	0	1	0	1	1	0	1	0	0	16	0	1741.79	ACN12538.1;ACN10184.1;NP_001134508.1;ACI67810.1	ACN12538.1	9	24	yes	no	2	2.0522e-43	268.13	By MS/MS	By MS/MS	By matching	By MS/MS	By MS/MS	By MS/MS	By MS/MS	By MS/MS
ASGNYATVISHNPETK	GDRGKLARASGNYATV	ISHNPETKKSRVKLPS	R	A	S	T	K	K	2	0	2	0	0	0	1	1	1	1	0	1	0	0	1	2	2	0	1	1	0	16	0	1687.82	ACI70186.1;ACI68574.1;ACN12701.1;ACN12214.1;ACN10341.1;ACN09867.1;ACI69963.1;ACH70991.1;ACH70990.1;ACH70633.1	ACI70186.1	129	144	yes	no	2;3	4.6586e-44	282.09	By MS/MS	By MS/MS	By MS/MS	By MS/MS	By MS/MS	By MS/MS	By MS/MS	By MS/MS
ASGVTVTDDVITVFNEMK	________________	ITVFNEMKVRKAQANE	M	A	S	M	K	V	1	0	1	2	0	0	1	1	0	1	0	1	1	1	0	1	3	0	0	4	0	18	0	1924.95	AGH92581.1;ACN12515.1;ACN10162.1;ACM08369.1	AGH92581.1	2	19	yes	no	2	1.0527e-19	203.99	By MS/MS	By MS/MS	By MS/MS	By MS/MS	By MS/MS	By MS/MS	By MS/MS	By MS/MS
ASGVTVTDEVITVFNEMK	________________	ITVFNEMKVRKAQANE	M	A	S	M	K	V	1	0	1	1	0	0	2	1	0	1	0	1	1	1	0	1	3	0	0	4	0	18	0	1938.96	ACI68104.1;ACN12581.1;ACN10226.1;ACI67300.1;ADM16311.1;ACI68395.1	ACI68104.1	2	19	no	no	2	1.2765e-89	340.32	By MS/MS	By MS/MS	By MS/MS	By MS/MS	By MS/MS	By MS/MS	By MS/MS	By MS/MS
ASHTAPQVLFSHR	QEFKEGRRASHTAPQV	PQVLFSHREPPLELKD	R	A	S	H	R	E	2	1	0	0	0	1	0	0	2	0	1	0	0	1	1	2	1	0	0	1	0	13	0	1449.75	ACH70809.1	ACH70809.1	191	203	yes	yes	3	0.00012418	115.37	By MS/MS	By MS/MS	By MS/MS	By MS/MS	By matching	By MS/MS	By MS/MS	By MS/MS
ASINMLR	GVFVKLNKASINMLRI	KASINMLRIAEPYIAW	K	A	S	L	R	I	1	1	1	0	0	0	0	0	0	1	1	0	1	0	0	1	0	0	0	0	0	7	0	803.432	NP_001133952.1;AGH92609.1;ACN12176.1;ACN09829.1;ACI34205.1;ADM15947.1;ACN12491.1;ACN10140.1;ACI68013.1;ACI33482.1;ACH70988.1;ACN12382.1;ACN10035.1	NP_001133952.1	125	131	no	no	1	0.039877	68.485	By matching	By matching	By MS/MS	By matching	By matching	By MS/MS	By matching	By matching
ASKPVWEQIGAGFVQHYYQQFDSDR	________________	YQQFDSDRTKLADLYT	M	A	S	D	R	T	2	1	0	2	0	4	1	2	1	1	0	1	0	2	1	2	0	1	2	2	0	25	1	2955.39	ACN12528.1;ACN10175.1;ACI70045.1;ACI68954.1;ACI68533.1;ACI66665.1	ACN12528.1	2	26	yes	no	3	2.5288e-05	85.387	By matching	By matching	By MS/MS	By MS/MS	By MS/MS	By MS/MS	By matching	By matching
ASLIVNQLTHK	EDQVVVNKASLIVNQL	IVNQLTHKEASRRALM	K	A	S	H	K	E	1	0	1	0	0	1	0	0	1	1	2	1	0	0	0	1	1	0	0	1	0	11	0	1222.7	NP_001133432.1;ACI33223.1	NP_001133432.1	152	162	yes	no	2	0.00040018	115.29	By matching	By MS/MS	By matching	By matching	By matching	By matching	By matching	By matching
ASLSMAPVNIFR	________________	MAPVNIFRQGADEEKA	M	A	S	F	R	Q	2	1	1	0	0	0	0	0	0	1	1	0	1	1	1	2	0	0	0	1	0	12	0	1304.69	NP_001133605.1;ACI33559.1	NP_001133605.1	2	13	yes	no	2	0.0014907	95.094	By matching	By MS/MS	By matching	By matching	By matching	By MS/MS	By matching	By MS/MS
ASPFLLQYIQEEIPDYR	SFPVDNLRASPFLLQY	QEEIPDYRNAIIVAKS	R	A	S	Y	R	N	1	1	0	1	0	2	2	0	0	2	2	0	0	1	2	1	0	0	2	0	0	17	0	2081.05	NP_001135368.1;ACI69627.1	NP_001135368.1	153	169	yes	no	2	0.00015461	111.77	By MS/MS	By MS/MS	By MS/MS	By MS/MS	By MS/MS	By MS/MS	By MS/MS	By MS/MS
ASQIGAHTLSGACLEPSALNELFPDWK	LRVCLVEKASQIGAHT	NELFPDWKERGAPLNT	K	A	S	W	K	E	4	0	1	1	1	1	2	2	1	1	4	1	0	1	2	3	1	1	0	0	0	27	0	2911.42	ACI34143.1	ACI34143.1	109	135	yes	yes	3	0.0013393	59.912	By matching	By matching	By matching	By MS/MS	By MS/MS	By matching	By MS/MS	By matching
ASQSQGIQQLLQAEK	________________	QQLLQAEKRAAEKVAE	M	A	S	E	K	R	2	0	0	0	0	5	1	1	0	1	2	1	0	0	0	2	0	0	0	0	0	15	0	1627.85	AGH92624.1;ADM16312.1;ADM16148.1;ADM16070.1;ACM09636.1;ACM09126.1;ACI69045.1;ACI68877.1;ACI68745.1;ACI68730.1;ACI68363.1;ACI66173.1;ACM08668.1	AGH92624.1	2	16	yes	no	2	1.985e-05	132.84	By matching	By matching	By matching	By matching	By matching	By matching	By matching	By MS/MS
ASQVAIDIR	________________	SQVAIDIRDNERNGRA	K	A	S	I	R	D	2	1	0	1	0	1	0	0	0	2	0	0	0	0	0	1	0	0	0	1	0	9	0	971.54	ACN60223.1	ACN60223.1	7	15	yes	yes	2	0.039891	59.265	By matching	By MS/MS	By matching	By matching	By matching	By MS/MS	By matching	By matching
ASSHHQNDLSSGFHPQFK	________________	SGFHPQFKSFATEAIH	M	A	S	F	K	S	1	0	1	1	0	2	0	1	3	0	1	1	0	2	1	4	0	0	0	0	0	18	0	2022.93	NP_001133465.1;ACN10804.1;ACI33287.1	NP_001133465.1	2	19	yes	no	2;3;4	4.26e-28	235.78	By MS/MS	By MS/MS	By MS/MS	By MS/MS	By MS/MS	By MS/MS	By MS/MS	By MS/MS
ASSILLTAIPLIYTQEDWTHTIK	TMKENANKASSILLTA	EDWTHTIKALKTTAQS	K	A	S	I	K	A	2	0	0	1	0	1	1	0	1	4	3	1	0	0	1	2	4	1	1	0	0	23	0	2613.41	NP_001133619.1;ACI33586.1	NP_001133619.1	258	280	yes	no	3	0.00066073	65.887	By MS/MS	By MS/MS	By matching	By MS/MS	By MS/MS	By MS/MS	By MS/MS	By MS/MS
ASSSPCVVISDDEQGYDLDLFCIPK	________________	LDLFCIPKHYADDLDR	M	A	S	P	K	H	1	0	0	4	2	1	1	1	0	2	2	1	0	1	2	4	0	0	1	2	0	25	0	2814.27	ADM16037.1;ACM08819.1;ACI69487.1;ACH70616.1;ACI67166.1	ADM16037.1	2	26	yes	no	3	2.429e-06	99.407	By MS/MS	By MS/MS	By MS/MS	By matching	By matching	By MS/MS	By MS/MS	By MS/MS
ASVSELACIYSALILHDDEVTVTEDK	________________	EVTVTEDKLMALIKAA	M	A	S	D	K	L	3	0	0	3	1	0	3	0	1	2	3	1	0	0	0	3	2	0	1	3	0	26	0	2877.4	ACM09686.1;ACM08627.1;ACH71044.1;ACI68941.1;ACN12471.1;ACN10120.1;ACI66209.1;ACH71045.1	ACM09686.1	2	27	no	no	2;3	7.4514e-26	186.06	By MS/MS	By MS/MS	By MS/MS	By MS/MS	By MS/MS	By MS/MS	By MS/MS	By MS/MS
ASYELLCK	LAVPAAEKASYELLCK	ASYELLCKDGTRASID	K	A	S	C	K	D	1	0	0	0	1	0	1	0	0	0	2	1	0	0	0	1	0	0	1	0	0	8	0	982.479	ACI33444.1;P80426.1;NP_001117127.1;AAA18838.1;P80429.1;AAN17024.1;AAN17019.1;ACC55231.1;ACC55232.1	ACI33444.1	229	236	yes	no	2	1.4138e-06	160.88	By MS/MS	By MS/MS	By MS/MS	By MS/MS	By MS/MS	By MS/MS	By MS/MS	By MS/MS
ASYFGVYDTAK	VQGIIIYRASYFGVYD	FGVYDTAKGMLPDPKN	R	A	S	A	K	G	2	0	0	1	0	0	0	1	0	0	0	1	0	1	0	1	1	0	2	1	0	11	0	1220.57	ADM15907.1;ACI67091.1;ACN12449.1;ACN10101.1;ACI69327.1;ACI67623.1;ACH71014.1;ACN11489.1	ADM15907.1	188	198	yes	no	2	0.00072169	107.09	By MS/MS	By matching	By matching	By matching	By matching	By MS/MS	By MS/MS	By matching
ATASILHNLSHQR	TGDMETARATASILHN	LHNLSHQREGLLSIFK	R	A	T	Q	R	E	2	1	1	0	0	1	0	0	2	1	2	0	0	0	0	2	1	0	0	0	0	13	0	1446.77	NP_001133432.1;ACI33223.1;ACI34242.1	NP_001133432.1	194	206	yes	no	3	0.0096906	67.252	By matching	By matching	By matching	By matching	By matching	By MS/MS	By matching	By MS/MS
ATAVHNGEFK	TQHAPHFKATAVHNGE	AVHNGEFKEMSLDDFK	K	A	T	F	K	E	2	0	1	0	0	0	1	1	1	0	0	1	0	1	0	0	1	0	0	1	0	10	0	1072.53	ADM15936.1;ACI69604.1;ACI69558.1;ACI66477.1;ADM15885.1;ACI67209.1;ACI68510.1	ADM15936.1	68	77	no	no	2	0.01021	79.07	By matching	By matching	By matching	By MS/MS	By matching	By MS/MS	By MS/MS	By matching
ATAVVDGQFK	GQPAPQFKATAVVDGQ	AVVDGQFKDIQLSDYI	K	A	T	F	K	D	2	0	0	1	0	1	0	1	0	0	0	1	0	1	0	0	1	0	0	2	0	10	0	1034.54	NP_001134295.1;ACI66947.1;AGH92591.1;ACM09551.1;ACI68353.1	NP_001134295.1	17	26	no	no	2	0.00051365	125.74	By MS/MS	By MS/MS	By MS/MS	By MS/MS	By MS/MS	By MS/MS	By MS/MS	By MS/MS
ATCASNSGHPTTCCSAAELMSVLFFHTMR	KLRINSVKATCASNSG	VLFFHTMRYKASDPRN	K	A	T	M	R	Y	4	1	1	0	3	0	1	1	2	0	2	0	2	2	1	4	4	0	0	1	0	29	0	3243.4	NP_001134006.1;ACI34298.1	NP_001134006.1	29	57	yes	no	3;4	1.1607e-14	143.19	By MS/MS	By MS/MS	By MS/MS	By MS/MS	By MS/MS	By MS/MS	By MS/MS	By MS/MS
ATCVFGQLPK	DWMKGDLKATCVFGQL	CVFGQLPKLEDGGFAL	K	A	T	P	K	L	1	0	0	0	1	1	0	1	0	0	1	1	0	1	1	0	1	0	0	1	0	10	0	1119.57	ACI69603.1;ACI68362.1	ACI69603.1	46	55	yes	no	2	1.0946e-09	209.73	By MS/MS	By MS/MS	By MS/MS	By MS/MS	By MS/MS	By MS/MS	By MS/MS	By MS/MS
ATDNASVNFVK	LSRFKIPKATDNASVN	NASVNFVKYKGDYYVS	K	A	T	V	K	Y	2	0	2	1	0	0	0	0	0	0	0	1	0	1	0	1	1	0	0	2	0	11	0	1164.58	NP_001266011.1;CCN27111.1	NP_001266011.1	145	155	yes	no	2	0.0022117	88.338	By matching	By matching	By matching	By matching	By MS/MS	By matching	By matching	By matching
ATEGMIVADK	LVLGADTRATEGMIVA	EGMIVADKNCSKIHYI	R	A	T	D	K	N	2	0	0	1	0	0	1	1	0	1	0	1	1	0	0	0	1	0	0	1	0	10	0	1033.51	ACI68005.1;ACI67557.1;ACI67792.1	ACI68005.1	63	72	yes	no	2	0.0092564	80.245	By MS/MS	By MS/MS	By matching	By MS/MS	By matching	By MS/MS	By MS/MS	By MS/MS
ATETDIYNFFSPLNPVR	HMRGLPYRATETDIYN	FSPLNPVRVHVEIGPD	R	A	T	V	R	V	1	1	2	1	0	0	1	0	0	1	1	0	0	2	2	1	2	0	1	1	0	17	0	1982.97	NP_001167168.1;ACN10974.1	NP_001167168.1	267	283	yes	no	2	2.6932e-09	170.48	By MS/MS	By MS/MS	By MS/MS	By matching	By MS/MS	By MS/MS	By MS/MS	By MS/MS
ATFHTPFSQLGQSPEGCSSYTFPK	EIVYATERATFHTPFS	CSSYTFPKIMGNAKAS	R	A	T	P	K	I	1	0	0	0	1	2	1	2	1	0	1	1	0	3	3	4	3	0	1	0	0	24	0	2673.22	NP_001135215.1;ACI33380.1;ACN11335.1	ACN11335.1	262	285	no	no	3	0.00019678	76.693	By MS/MS	By MS/MS	By matching	By MS/MS	By MS/MS	By MS/MS	By matching	By matching
ATFQHAIAK	QTCFDTKKATFQHAIA	TFQHAIAKRVAELKSL	K	A	T	A	K	R	3	0	0	0	0	1	0	0	1	1	0	1	0	1	0	0	1	0	0	0	0	9	0	985.535	Q03156.1;NP_001117164.1;CAA43187.1	Q03156.1	201	209	yes	no	2	0.00049988	143.37	By MS/MS	By MS/MS	By MS/MS	By MS/MS	By MS/MS	By MS/MS	By MS/MS	By MS/MS
ATFQHAVMK	QTCFDTKKATFQHAVM	TFQHAVMKRVAELRSL	K	A	T	M	K	R	2	0	0	0	0	1	0	0	1	0	0	1	1	1	0	0	1	0	0	1	0	9	0	1031.52	P21848.1;NP_001117137.1;CAA36643.1	P21848.1	201	209	yes	no	2	0.0021211	101.38	By matching	By matching	By matching	By MS/MS	By matching	By MS/MS	By matching	By matching
ATFYMNVLQQK	SDDEVRDRATFYMNVL	YMNVLQQKQKALNAAY	R	A	T	Q	K	Q	1	0	1	0	0	2	0	0	0	0	1	1	1	1	0	0	1	0	1	1	0	11	0	1341.68	NP_001133706.1;ACI33742.1	NP_001133706.1	528	538	yes	no	2	0.00020159	127.83	By matching	By matching	By matching	By matching	By matching	By matching	By matching	By matching
ATIAGGGVIPHIHK	EELDSLIKATIAGGGV	GVIPHIHKSLIGKKGQ	K	A	T	H	K	S	2	0	0	0	0	0	0	3	2	3	0	1	0	0	1	0	1	0	0	1	0	14	0	1369.78	ADM16155.1;ADM16115.1;ACN12505.1;ACN12374.1;ACN10153.1;ACN10027.1;ACM09557.1;ACI69641.1;ACI68191.1;ACI67816.1;ACI66843.1;ACI66770.1;ACI66137.1;ACI66110.1;ACI34256.1;ACH70792.1;ACM09081.1;ACM09697.1;ACI69015.1;ACI69005.1	ADM16155.1	103	116	yes	no	2	4.5522e-08	158.42	By MS/MS	By MS/MS	By MS/MS	By MS/MS	By MS/MS	By MS/MS	By MS/MS	By MS/MS
ATIANMCPEYGATAAFFPVDHISLQYLEQTGR	AQLSIADRATIANMCP	QYLEQTGRDAEKLDYI	R	A	T	G	R	D	5	1	1	1	1	2	2	2	1	2	2	0	1	2	2	1	3	0	2	1	0	32	0	3570.69	NP_001133702.1;ACI33729.1	NP_001133702.1	304	335	yes	no	3	7.8314e-18	134.03	By MS/MS	By MS/MS	By MS/MS	By MS/MS	By MS/MS	By MS/MS	By MS/MS	By MS/MS
ATIAVEMEDTFVQNLK	RVPVGADRATIAVEME	DTFVQNLKHAADVLSN	R	A	T	L	K	H	2	0	1	1	0	1	2	0	0	1	1	1	1	1	0	0	2	0	0	2	0	16	0	1807.9	ACI69245.1;NP_001134497.1;ACI67756.1	ACI69245.1	119	134	yes	no	2	4.4439e-13	187.16	By MS/MS	By matching	By matching	By matching	By MS/MS	By matching	By matching	By matching
ATITPGTVLVLLTGR	SQHKRNLRATITPGTV	VLVLLTGRHRGKRVVF	R	A	T	G	R	H	1	1	0	0	0	0	0	2	0	1	3	0	0	0	1	0	4	0	0	2	0	15	0	1510.91	AGH92552.1;NP_001158741.1;ACN12386.1;ACN10039.1;NP_001135169.1;ACH70868.1	AGH92552.1	113	127	no	no	2;3	8.8072e-26	233.28	By MS/MS	By MS/MS	By MS/MS	By MS/MS	By MS/MS	By MS/MS	By MS/MS	By MS/MS
ATLCQAALGLLLR	PKPIPPSRATLCQAAL	AALGLLLRERASTQTF	R	A	T	L	R	E	3	1	0	0	1	1	0	1	0	0	5	0	0	0	0	0	1	0	0	0	0	13	0	1398.8	ACI34035.1	ACI34035.1	494	506	yes	yes	2	2.0401e-20	230.81	By MS/MS	By MS/MS	By MS/MS	By MS/MS	By MS/MS	By MS/MS	By MS/MS	By MS/MS
ATLDKPNPDR	TKLSKIRRATLDKPNP	LDKPNPDRYVAAELNT	R	A	T	D	R	Y	1	1	1	2	0	0	0	0	0	0	1	1	0	0	2	0	1	0	0	0	0	10	1	1125.58	NP_001135118.1;ACN11404.1;ACI33951.1	NP_001135118.1	251	260	yes	no	2	0.0028745	130.41	By MS/MS	By MS/MS	By MS/MS	By MS/MS	By matching	By matching	By MS/MS	By MS/MS
ATLTCTPDFAYGSK	GQMSVGQRATLTCTPD	PDFAYGSKGHPGIIPP	R	A	T	S	K	G	2	0	0	1	1	0	0	1	0	0	1	1	0	1	1	1	3	0	1	0	0	14	0	1530.7	NP_001135037.2;ACN12426.1;ACN10079.1;ACM08989.1;ACM08399.1;ACI69968.2;ACM09264.1;ACM08491.1;ADM16189.1	NP_001135037.2	73	86	yes	no	2	1.9976e-12	187.74	By MS/MS	By MS/MS	By MS/MS	By MS/MS	By MS/MS	By MS/MS	By MS/MS	By MS/MS
ATMFPTETYK	MSEDQTVKATMFPTET	MFPTETYKAFYKTYAD	K	A	T	Y	K	A	1	0	0	0	0	0	1	0	0	0	0	1	1	1	1	0	3	0	1	0	0	10	0	1187.55	NP_001134944.1;ADM16117.1;ACI69600.1;ACI67658.1;ADM16204.1;ACI67152.1;ACI69202.1	NP_001134944.1	213	222	yes	no	2	0.0018458	99.568	By MS/MS	By MS/MS	By MS/MS	By MS/MS	By MS/MS	By MS/MS	By MS/MS	By MS/MS
ATMQNLNDR	GLLAGGEKATMQNLND	TMQNLNDRLASYLDKV	K	A	T	D	R	L	1	1	2	1	0	1	0	0	0	0	1	0	1	0	0	0	1	0	0	0	0	9	0	1061.49	CON__Q04695;CON__Q9QWL7;CON__Q9C075;CON__Q99PS0	CON__Q04695	86	94	yes	no	2	0.00092301	128.03	By MS/MS	By MS/MS	By MS/MS	By matching	By MS/MS	By matching	By matching	By MS/MS
ATQEEMLAAVDSCSQSYHSWSETSILAR	EVIARVPKATQEEMLA	SETSILARQQIFLRYQ	K	A	T	A	R	Q	4	1	0	1	1	2	3	0	1	1	2	0	1	0	0	6	2	1	1	1	0	28	0	3156.41	ACI34202.1	ACI34202.1	65	92	yes	yes	3;4	2.3246e-26	178.46	By MS/MS	By MS/MS	By MS/MS	By MS/MS	By MS/MS	By MS/MS	By MS/MS	By MS/MS
ATQEQIDSFR	DASGNKTKATQEQIDS	QEQIDSFRASLSKLGD	K	A	T	F	R	A	1	1	0	1	0	2	1	0	0	1	0	0	0	1	0	1	1	0	0	0	0	10	0	1193.57	NP_001133266.1;ACI32927.1;ACH70652.1	ACH70652.1	142	151	no	no	2	2.8282e-14	231.07	By MS/MS	By MS/MS	By MS/MS	By MS/MS	By MS/MS	By MS/MS	By MS/MS	By MS/MS
ATSNVFAMFDQSQIQEFK	TTKKRPQRATSNVFAM	QSQIQEFKEAFNMIDQ	R	A	T	F	K	E	2	0	1	1	0	3	1	0	0	1	0	1	1	3	0	2	1	0	0	1	0	18	0	2089.98	ADM15912.1;ACI69826.1;ACI69090.1;ACI66978.1;ACI33189.1;ADM15886.1;ACI68070.1;ACH70954.1;ACI67885.1;ACI66712.1;ACI66702.1;ACH70953.1;ACI69179.1	ADM15886.1	18	35	no	no	2	1.1103e-104	357.93	By MS/MS	By MS/MS	By MS/MS	By MS/MS	By MS/MS	By MS/MS	By MS/MS	By MS/MS
ATTAAGSGHPTSCCSVAEIMSVLFFNTMK	RLRINSIKATTAAGSG	VLFFNTMKYRPEDPRN	K	A	T	M	K	Y	4	0	1	0	2	0	1	2	1	1	1	1	2	2	1	4	4	0	0	2	0	29	0	3074.4	ACN11355.1	ACN11355.1	29	57	yes	yes	3	0.06673	19.144	By matching	By matching	By matching	By matching	By matching	By matching	By MS/MS	By matching
ATWPPHWLENPQGGDALK	MKDRPSVKATWPPHWL	PQGGDALKEF______	K	A	T	L	K	E	2	0	1	1	0	1	1	2	1	0	2	1	0	0	3	0	1	2	0	0	0	18	0	2015.99	ACM09168.1;ACM08643.1	ACM08643.1	207	224	no	no	3	0.00011956	106.82	By MS/MS	By MS/MS	By MS/MS	By matching	By MS/MS	By MS/MS	By MS/MS	By MS/MS
ATYTEMLAAVDSCSR	EVVSRVPKATYTEMLA	AAVDSCSRAYASWSET	K	A	T	S	R	A	3	1	0	1	1	0	1	0	0	0	1	0	1	0	0	2	2	0	1	1	0	15	0	1673.74	NP_001136188.1;ACI34215.1	NP_001136188.1	64	78	yes	no	2	7.409e-09	171.76	By MS/MS	By MS/MS	By MS/MS	By MS/MS	By MS/MS	By matching	By MS/MS	By MS/MS
AVAAVGPVSVAIDAGHESFQFYESGIYYEK	GKEHAMMKAVAAVGPV	ESGIYYEKECSSEELD	K	A	V	E	K	E	5	0	0	1	0	1	3	3	1	2	0	1	0	2	1	3	0	0	3	4	0	30	0	3203.55	NP_001140018.1;ACM09255.1	NP_001140018.1	243	272	yes	no	3	0.0096891	41.475	By matching	By matching	By matching	By matching	By MS/MS	By matching	By matching	By matching
AVAEELATER	GFEPYHIRAVAEELAT	AEELATERGYLPAASE	R	A	V	E	R	G	3	1	0	0	0	0	3	0	0	0	1	0	0	0	0	0	1	0	0	1	0	10	0	1087.55	NP_001133157.1;ACH70821.1	NP_001133157.1	304	313	yes	no	2	1.5723e-09	205.18	By MS/MS	By MS/MS	By MS/MS	By MS/MS	By MS/MS	By MS/MS	By MS/MS	By MS/MS
AVAGFNNITYR	ECQLEEARAVAGFNNI	GFNNITYRKGTAEELP	R	A	V	Y	R	K	2	1	2	0	0	0	0	1	0	1	0	0	0	1	0	0	1	0	1	1	0	11	0	1224.63	ACI70132.1;ACI69997.1;ACI69849.1	ACI70132.1	81	91	yes	no	2	0.00037161	117.09	By matching	By matching	By MS/MS	By matching	By matching	By matching	By MS/MS	By MS/MS
AVAHTGNQGIER	FDRNRAEKAVAHTGNQ	TGNQGIERAMDWLMEH	K	A	V	E	R	A	2	1	1	0	0	1	1	2	1	1	0	0	0	0	0	0	1	0	0	1	0	12	0	1251.63	NP_001158761.1;ACN12706.1;ACN10346.1	NP_001158761.1	23	34	yes	no	2	0.011683	84.734	By MS/MS	By MS/MS	By matching	By matching	By MS/MS	By matching	By MS/MS	By MS/MS
AVAQALEVIPR	GVEQWPYRAVAQALEV	QALEVIPRTLIQNCGA	R	A	V	P	R	T	3	1	0	0	0	1	1	0	0	1	1	0	0	0	1	0	0	0	0	2	0	11	0	1165.68	ACH85258.1	ACH85258.1	436	446	yes	yes	2	0.014827	71.806	By matching	By MS/MS	By matching	By MS/MS	By matching	By matching	By matching	By MS/MS
AVAQLQSEK	RRQSNVDKAVAQLQSE	VAQLQSEKIQVTGTTC	K	A	V	E	K	I	2	0	0	0	0	2	1	0	0	0	1	1	0	0	0	1	0	0	0	1	0	9	0	972.524	NP_001134438.1;ACI67513.1	NP_001134438.1	76	84	yes	no	2	0.0016911	106.88	By MS/MS	By MS/MS	By MS/MS	By MS/MS	By matching	By MS/MS	By matching	By matching
AVASLNTPLFPVDPSKDPMDFLK	RCHPERVRAVASLNTP	KDPMDFLKTVPIFDYQ	R	A	V	L	K	T	2	0	1	3	0	0	0	0	0	0	3	2	1	2	4	2	1	0	0	2	0	23	1	2501.29	ACI33129.1	ACI33129.1	352	374	yes	yes	3	9.2369e-07	109.77	By matching	By MS/MS	By MS/MS	By MS/MS	By MS/MS	By MS/MS	By MS/MS	By MS/MS
AVASTLR	KSHIMAAKAVASTLRT	KAVASTLRTSLGPNGL	K	A	V	L	R	T	2	1	0	0	0	0	0	0	0	0	1	0	0	0	0	1	1	0	0	1	0	7	0	716.418	NP_001167310.1;ACN11333.1	NP_001167310.1	43	49	yes	no	1	0.069477	68.485	By matching	By MS/MS	By matching	By matching	By matching	By matching	By matching	By matching
AVAVVVDPIQSVK	SFEALSERAVAVVVDP	VDPIQSVKGKVVIDAF	R	A	V	V	K	G	2	0	0	1	0	1	0	0	0	1	0	1	0	0	1	1	0	0	0	5	0	13	0	1323.78	NP_001135360.1;ADM16265.1;ACI69220.1;ACI67841.1	NP_001135360.1	140	152	yes	no	2	0.00086173	96.059	By MS/MS	By MS/MS	By matching	By MS/MS	By matching	By matching	By matching	By matching
AVCLLLGPDFFTDIITIETADHAR	PKRANVIKAVCLLLGP	IETADHARLQLQLSYN	K	A	V	A	R	L	3	1	0	3	1	0	1	1	1	3	3	0	0	2	1	0	3	0	0	1	0	24	0	2687.36	NP_001167140.1;ACN10921.1	NP_001167140.1	542	565	yes	no	3	0.0083943	44.468	By MS/MS	By MS/MS	By matching	By MS/MS	By matching	By MS/MS	By matching	By matching
AVCMLSNTTAIAEAWAR	GDLAKVQRAVCMLSNT	AIAEAWARLDHKFDLM	R	A	V	A	R	L	5	1	1	0	1	0	1	0	0	1	1	0	1	0	0	1	2	1	0	1	0	17	0	1863.9	NP_001167032.1;ACI33964.1;ACH71025.1;ACN10869.1;NP_001133158.1;ACN10896.1;ACH70822.1;ACH71026.1;NP_001134939.1;ACI69569.1;ACI32906.1	NP_001133158.1	374	390	no	no	2;3	1.7014e-62	306.37	By MS/MS	By MS/MS	By MS/MS	By MS/MS	By MS/MS	By MS/MS	By MS/MS	By MS/MS
AVCVEAGMIALR	DFNGAQCKAVCVEAGM	EAGMIALRRGATELNH	K	A	V	L	R	R	3	1	0	0	1	0	1	1	0	1	1	0	1	0	0	0	0	0	0	2	0	12	0	1288.66	NP_001134065.1;AGH92560.1;ACI66100.1	NP_001134065.1	386	397	yes	no	2	0.050894	77.597	By matching	By matching	By matching	By MS/MS	By matching	By matching	By matching	By matching
AVDAFIQTGR	HTDQDIDRAVDAFIQT	DAFIQTGRKHGVVS__	R	A	V	G	R	K	2	1	0	1	0	1	0	1	0	1	0	0	0	1	0	0	1	0	0	1	0	10	0	1076.56	ACI67339.1	ACI67339.1	412	421	yes	yes	2	0.0007685	115.29	By MS/MS	By MS/MS	By MS/MS	By MS/MS	By matching	By MS/MS	By MS/MS	By MS/MS
AVDAYFNVLSSPIGAMYNMFPR	PMFQLIQKAVDAYFNV	AMYNMFPRIIWCFPDK	K	A	V	P	R	I	3	1	2	1	0	0	0	1	0	1	1	0	2	2	2	2	0	0	2	2	0	22	0	2462.18	ACN11468.1;ACI33595.1	ACN11468.1	207	228	yes	no	2	0.015549	47.991	By matching	By matching	By matching	By matching	By matching	By matching	By matching	By matching
AVDDFHIGTK	ELAFMGTKAVDDFHIG	DDFHIGTKAALAGGTT	K	A	V	T	K	A	1	0	0	2	0	0	0	1	1	1	0	1	0	1	0	0	1	0	0	1	0	10	0	1101.55	NP_001167410.1;ACN11006.1	NP_001167410.1	75	84	yes	no	2	0.0052028	93.442	By matching	By matching	By matching	By matching	By matching	By matching	By matching	By matching
AVDECKPANVHVVTGSSEESAQILAGLEK	AVADFVKRAVDECKPA	QILAGLEKDGMVKRLP	R	A	V	E	K	D	4	0	1	1	1	1	4	2	1	1	2	2	0	0	1	3	1	0	0	4	0	29	1	3037.5	ACI33922.1;NP_001117114.1;AAZ73233.2	ACI33922.1	41	69	yes	no	3;4	1.7081e-27	194.19	By MS/MS	By MS/MS	By MS/MS	By MS/MS	By MS/MS	By MS/MS	By MS/MS	By MS/MS
AVDGYVKPQIK	YYTPPLSKAVDGYVKP	GYVKPQIKQVVPEFTT	K	A	V	I	K	Q	1	0	0	1	0	1	0	1	0	1	0	2	0	0	1	0	0	0	1	2	0	11	1	1216.68	NP_001167288.1;ACN11286.1	NP_001167288.1	694	704	yes	no	2	0.055984	80.916	By matching	By MS/MS	By matching	By matching	By matching	By matching	By matching	By matching
AVDHVNKDIAAK	YLGKGTVKAVDHVNKD	VNKDIAAKLIEKKFSV	K	A	V	A	K	L	3	0	1	2	0	0	0	0	1	1	0	2	0	0	0	0	0	0	0	2	0	12	1	1279.69	NP_001133193.1;B5DGQ7.1;ACH70932.1;ACH70931.1;NP_001135172.1;ACH70930.1	NP_001133193.1	65	76	yes	no	2	0.0024553	106.79	By matching	By matching	By MS/MS	By matching	By matching	By matching	By matching	By matching
AVDLLLDNDQIVAVLGNK	DPTGAFTKAVDLLLDN	IVAVLGNKRSQRYAML	K	A	V	N	K	R	2	0	2	3	0	1	0	1	0	1	4	1	0	0	0	0	0	0	0	3	0	18	0	1909.05	ACI66176.1	ACI66176.1	134	151	yes	yes	2	6.3645e-14	189.45	By matching	By matching	By matching	By MS/MS	By matching	By matching	By MS/MS	By MS/MS
AVDNQVYVATASPAR	WELLQRGRAVDNQVYV	VATASPARDETASYVA	R	A	V	A	R	D	4	1	1	1	0	1	0	0	0	0	0	0	0	0	1	1	1	0	1	3	0	15	0	1560.79	NP_001135127.1;ACI66726.1	NP_001135127.1	204	218	yes	no	2	2.7388e-18	203.2	By MS/MS	By MS/MS	By MS/MS	By MS/MS	By MS/MS	By MS/MS	By MS/MS	By MS/MS
AVDSLVPIGR	EPMQTGIKAVDSLVPI	DSLVPIGRGQRELIIG	K	A	V	G	R	G	1	1	0	1	0	0	0	1	0	1	1	0	0	0	1	1	0	0	0	2	0	10	0	1025.59	ACN10935.1;ACI33076.1;NP_001133132.1;ACH70752.1	ACN10935.1	195	204	no	no	2	0.00084603	112.11	By MS/MS	By MS/MS	By MS/MS	By MS/MS	By MS/MS	By MS/MS	By MS/MS	By MS/MS
AVDSQLLPLIK	VQRKEDQKAVDSQLLP	SQLLPLIKKVPQLKGY	K	A	V	I	K	K	1	0	0	1	0	1	0	0	0	1	3	1	0	0	1	1	0	0	0	1	0	11	0	1195.72	NP_001135169.1;ACH70868.1	NP_001135169.1	223	233	yes	no	2	0.0049305	84.605	By matching	By matching	By MS/MS	By matching	By MS/MS	By matching	By MS/MS	By matching
AVDWIFSHLDDLESMEVSEGGR	ATSNILERAVDWIFSH	MEVSEGGRSAAESEGS	R	A	V	G	R	S	1	1	0	3	0	0	3	2	1	1	2	0	1	1	0	3	0	1	0	2	0	22	0	2491.13	NP_001135286.1;ACI34254.1	NP_001135286.1	750	771	yes	no	3	1.5992e-07	123	By MS/MS	By MS/MS	By matching	By MS/MS	By MS/MS	By MS/MS	By MS/MS	By MS/MS
AVEDIHGLFALSK	ELWQEAFKAVEDIHGL	HGLFALSKKPPKPQLM	K	A	V	S	K	K	2	0	0	1	0	0	1	1	1	1	2	1	0	1	0	1	0	0	0	1	0	13	0	1398.75	NP_001167090.1;ACN10789.1	NP_001167090.1	252	264	yes	no	2	0.034953	80.96	By MS/MS	By matching	By matching	By matching	By matching	By MS/MS	By MS/MS	By matching
AVENPTCAEIR	GRRIPAEKAVENPTCA	NPTCAEIRDVLTAAGA	K	A	V	I	R	D	2	1	1	0	1	0	2	0	0	1	0	0	0	0	1	0	1	0	0	1	0	11	0	1258.6	NP_001134585.1;ADM16240.1;ACI69954.1;ACI69499.1;ACI68109.1;ACI67725.1	NP_001134585.1	39	49	yes	no	2	0.021514	94.538	By matching	By matching	By matching	By matching	By matching	By matching	By MS/MS	By matching
AVENSSTAIGIR	FQVEYAMKAVENSSTA	SSTAIGIRCKDGVVFG	K	A	V	I	R	C	2	1	1	0	0	0	1	1	0	2	0	0	0	0	0	2	1	0	0	1	0	12	0	1216.64	ACN12722.1;ACN10361.1;ACI69959.1;ACI66058.1	ACN12722.1	30	41	yes	no	2	3.3974e-07	139.74	By matching	By matching	By matching	By matching	By MS/MS	By matching	By matching	By MS/MS
AVENYLIQMAR	LVKPEKAKAVENYLIQ	NYLIQMARMGQLGGKI	K	A	V	A	R	M	2	1	1	0	0	1	1	0	0	1	1	0	1	0	0	0	0	0	1	1	0	11	0	1306.67	ACM08983.1;NP_001134701.1;ADM15931.1;ACI68531.1;ACM09003.1;ACM08287.1	ACM08983.1	71	81	yes	no	2	9.4643e-06	155.48	By matching	By MS/MS	By MS/MS	By MS/MS	By matching	By matching	By matching	By matching
AVETPLFWIGALTAAYFSVCSVYR	STGETLLRAVETPLFW	FSVCSVYRLLSGLRVW	R	A	V	Y	R	L	4	1	0	0	1	0	1	1	0	1	2	0	0	2	1	2	2	1	2	3	0	24	0	2720.37	NP_001135118.1;ACN11404.1;ACI33951.1	NP_001135118.1	11	34	yes	no	3	0.076965	13.941	By matching	By matching	By matching	By MS/MS	By matching	By matching	By matching	By matching
AVEVEPSASFLNANDVFVLK	QSSTRATRAVEVEPSA	ANDVFVLKSPDAMFVW	R	A	V	L	K	S	3	0	2	1	0	0	2	0	0	0	2	1	0	2	1	2	0	0	0	4	0	20	0	2148.11	ACN60223.1	ACN60223.1	345	364	yes	yes	2	4.1502e-16	186.74	By matching	By matching	By matching	By MS/MS	By MS/MS	By MS/MS	By MS/MS	By matching
AVFDETYPDPVR	AKAIQGLRAVFDETYP	ETYPDPVRVVSIGIPV	R	A	V	V	R	V	1	1	0	2	0	0	1	0	0	0	0	0	0	1	2	0	1	0	1	2	0	12	0	1407.67	NP_001133550.1;ACI33457.1	NP_001133550.1	684	695	yes	no	2	5.5376e-05	129.74	By matching	By matching	By MS/MS	By MS/MS	By matching	By MS/MS	By MS/MS	By MS/MS
AVFILDNDGNR	EPSLYTVKAVFILDND	ILDNDGNRLLSKYYDK	K	A	V	N	R	L	1	1	2	2	0	0	0	1	0	1	1	0	0	1	0	0	0	0	0	1	0	11	0	1232.61	ACM09692.1;ACM09357.1	ACM09692.1	15	25	yes	no	2	0.0020309	90.614	By matching	By matching	By matching	By matching	By MS/MS	By MS/MS	By matching	By matching
AVFLAEQSGIPILK	RVAGLCNRAVFLAEQS	QSGIPILKRDVAGDAS	R	A	V	L	K	R	2	0	0	0	0	1	1	1	0	2	2	1	0	1	1	1	0	0	0	1	0	14	0	1484.86	AAV97941.1;AAV97940.1	AAV97941.1	73	86	yes	no	2	0.00067234	100.11	By matching	By MS/MS	By MS/MS	By matching	By MS/MS	By matching	By matching	By MS/MS
AVFNEYQQMSGR	SRSKPHLRAVFNEYQQ	EYQQMSGRDIVKSICR	R	A	V	G	R	D	1	1	1	0	0	2	1	1	0	0	0	0	1	1	0	1	0	0	1	1	0	12	0	1428.65	ACN11191.1	ACN11191.1	418	429	yes	yes	2	3.5236e-05	136.3	By matching	By MS/MS	By matching	By matching	By MS/MS	By MS/MS	By matching	By MS/MS
AVFPSIVGR	FAGDDAPRAVFPSIVG	VFPSIVGRPRHQGVMV	R	A	V	G	R	P	1	1	0	0	0	0	0	1	0	1	0	0	0	1	1	1	0	0	0	2	0	9	0	944.544	O42161.1;NP_001116997.1;ACN11317.1;ACI33371.1;AAB65430.1;ACI67042.1;NP_001134991.1;ACI69763.1;NP_001133115.1;NP_001117011.1;ACH70896.1;ACH70895.1;ACH70894.1;ACH70714.1;AAG25672.1	O42161.1	29	37	no	no	2	0.00074737	134.26	By MS/MS	By MS/MS	By MS/MS	By MS/MS	By MS/MS	By MS/MS	By MS/MS	By MS/MS
AVFPSIVGRPR	FAGDDAPRAVFPSIVG	PSIVGRPRHQGVMVGM	R	A	V	P	R	H	1	2	0	0	0	0	0	1	0	1	0	0	0	1	2	1	0	0	0	2	0	11	1	1197.7	O42161.1;NP_001116997.1;ACN11317.1;ACI33371.1;AAB65430.1;ACI67042.1;NP_001134991.1;ACI69763.1;NP_001133115.1;NP_001117011.1;ACH70896.1;ACH70895.1;ACH70894.1;ACH70714.1;AAG25672.1	O42161.1	29	39	no	no	2	0.00015676	152.04	By matching	By MS/MS	By MS/MS	By MS/MS	By MS/MS	By matching	By matching	By matching
AVFVDLEPTVIDEVR	GAGKHVPRAVFVDLEP	PTVIDEVRSGTYRQLF	R	A	V	V	R	S	1	1	0	2	0	0	2	0	0	1	1	0	0	1	1	0	1	0	0	4	0	15	0	1700.9	ACN58628.1;ACH71026.1;NP_001134939.1;ACI69569.1	ACN58628.1	46	60	no	no	2	2.02e-13	196.37	By MS/MS	By MS/MS	By MS/MS	By MS/MS	By MS/MS	By MS/MS	By MS/MS	By MS/MS
AVGIWHCGSCMK	GKTKMKRRAVGIWHCG	WHCGSCMKTVAGGAWT	R	A	V	M	K	T	1	0	0	0	2	0	0	2	1	1	0	1	1	0	0	1	0	1	0	1	0	12	0	1404.61	NP_001135081.1;ADM16067.1;ADM15895.1;ACN12431.1;ACN12421.1;ACN10084.1;ACN10074.1;ACM09740.1;ACI70130.1;ACI68435.1;ACI68026.1;ACI66480.1;ACH70987.1;ACH70986.1	NP_001135081.1	51	62	yes	no	2	1.9933e-12	205.52	By MS/MS	By MS/MS	By MS/MS	By MS/MS	By MS/MS	By MS/MS	By MS/MS	By MS/MS
AVGSTDDSFTTFFSATGIGK	DGTMPNNKAVGSTDDS	FSATGIGKYVPRAIFV	K	A	V	G	K	Y	2	0	0	2	0	0	0	3	0	1	0	1	0	3	0	3	4	0	0	1	0	20	0	2007.94	NP_001133158.1;ACN10896.1;ACH70822.1	NP_001133158.1	41	60	yes	no	2	1.8302e-31	238.88	By MS/MS	By MS/MS	By MS/MS	By MS/MS	By MS/MS	By MS/MS	By MS/MS	By MS/MS
AVGTELGISPVIIR	DHFLEEIKAVGTELGI	GISPVIIRGEELKQKG	K	A	V	I	R	G	1	1	0	0	0	0	1	2	0	3	1	0	0	0	1	1	1	0	0	2	0	14	0	1423.84	NP_001133677.1;ACI33685.1	NP_001133677.1	203	216	yes	no	2	1.4652e-05	135.91	By MS/MS	By matching	By matching	By matching	By MS/MS	By matching	By matching	By matching
AVLAESYER	GPFLLGIKAVLAESYE	VLAESYERIHRSNLVG	K	A	V	E	R	I	2	1	0	0	0	0	2	0	0	0	1	0	0	0	0	1	0	0	1	1	0	9	0	1036.52	NP_001133702.1;ACI33729.1	NP_001133702.1	804	812	yes	no	2	7.4527e-05	168.83	By matching	By MS/MS	By MS/MS	By MS/MS	By matching	By MS/MS	By MS/MS	By MS/MS
AVLASLKPSTLPSVCLGGFAITPPAVFR	DTEGQKVKAVLASLKP	ITPPAVFRLKAGSGPI	K	A	V	F	R	L	4	1	0	0	1	0	0	2	0	1	4	1	0	2	4	3	2	0	0	3	0	28	1	2868.59	ACN60173.1	ACN60173.1	72	99	yes	yes	3	0.0045711	46.399	By MS/MS	By matching	By matching	By MS/MS	By matching	By matching	By MS/MS	By MS/MS
AVLDCADFYIQR	IVGIMPLRAVLDCADF	CADFYIQRDRLFIVEE	R	A	V	Q	R	D	2	1	0	2	1	1	0	0	0	1	1	0	0	1	0	0	0	0	1	1	0	12	0	1469.7	NP_001158793.1;ACN10483.1	NP_001158793.1	277	288	yes	no	2	3.0941e-10	197.3	By MS/MS	By MS/MS	By MS/MS	By MS/MS	By MS/MS	By MS/MS	By MS/MS	By MS/MS
AVLFCLSEDK	DEKKKRKKAVLFCLSE	LFCLSEDKKHIVLEAG	K	A	V	D	K	K	1	0	0	1	1	0	1	0	0	0	2	1	0	1	0	1	0	0	0	1	0	10	0	1180.58	ACI68104.1;ACN12581.1;ACN10226.1;ACI67300.1;ADM16311.1;ACI68395.1;AGH92581.1;ACN12515.1;ACN10162.1;ACM08369.1	ACI68104.1	36	45	no	no	2	0.0019837	98.04	By matching	By matching	By MS/MS	By matching	By matching	By matching	By MS/MS	By MS/MS
AVLFCLSEDKK	DEKKKRKKAVLFCLSE	FCLSEDKKHIVLEAGK	K	A	V	K	K	H	1	0	0	1	1	0	1	0	0	0	2	2	0	1	0	1	0	0	0	1	0	11	1	1308.67	ACI68104.1;ACN12581.1;ACN10226.1;ACI67300.1;ADM16311.1;ACI68395.1;AGH92581.1;ACN12515.1;ACN10162.1;ACM08369.1	ACI68104.1	36	46	no	no	2	0.0069706	141.89	By matching	By matching	By MS/MS	By MS/MS	By matching	By matching	By matching	By MS/MS
AVLHVSQIVAR	ISFNINVKAVLHVSQI	HVSQIVARGMKARGTG	K	A	V	A	R	G	2	1	0	0	0	1	0	0	1	1	1	0	0	0	0	1	0	0	0	3	0	11	0	1191.71	NP_001134103.1;ADM16151.1;ACN12443.1;ACN10830.1;ACN10095.1;ACI66228.1	NP_001134103.1	111	121	yes	no	2	0.00060475	108.56	By MS/MS	By MS/MS	By MS/MS	By MS/MS	By MS/MS	By MS/MS	By MS/MS	By MS/MS
AVLIDNINR	LDLTEEEKAVLIDNIN	VLIDNINRRLTPQAVK	K	A	V	N	R	R	1	1	2	1	0	0	0	0	0	2	1	0	0	0	0	0	0	0	0	1	0	9	0	1026.58	NP_001133655.1;ACI33647.1	NP_001133655.1	174	182	yes	no	2	0.0014201	110.76	By MS/MS	By MS/MS	By MS/MS	By MS/MS	By MS/MS	By MS/MS	By MS/MS	By MS/MS
AVLVDKDHSPK	SDFYEGVRAVLVDKDH	VDKDHSPKWSPSTLKE	R	A	V	P	K	W	1	0	0	2	0	0	0	0	1	0	1	2	0	0	1	1	0	0	0	2	0	11	1	1207.66	ACN11180.1	ACN11180.1	345	355	yes	yes	2	0.0028741	115.33	By matching	By matching	By matching	By MS/MS	By matching	By matching	By matching	By MS/MS
AVLVDLEPGTMDSVR	SGGKYVPRAVLVDLEP	PGTMDSVRSGPFGQIF	R	A	V	V	R	S	1	1	0	2	0	0	1	1	0	0	2	0	1	0	1	1	1	0	0	3	0	15	0	1600.81	ACN12631.1;ACN11362.1;ACN10275.1;ABD14399.1;NP_001134313.1;ACI67022.1;NP_001133265.1;ACI32926.1;ABQ59661.1;ABO13873.1;ACN12531.1;ACN10433.1;ACN10177.1;ACM09816.1;ACM08771.1;ACM09827.1;ACM08927.1;ACM08213.1	ACN12531.1	63	77	no	no	2	2.2149e-12	178.67	By MS/MS	By MS/MS	By MS/MS	By MS/MS	By MS/MS	By MS/MS	By MS/MS	By MS/MS
AVLVGYDEK	YPLDPDVKAVLVGYDE	VLVGYDEKFDFIKLAK	K	A	V	E	K	F	1	0	0	1	0	0	1	1	0	0	1	1	0	0	0	0	0	0	1	2	0	9	0	992.518	NP_001167117.1;ACN10870.1	NP_001167117.1	154	162	yes	no	2	0.011883	76.679	By matching	By matching	By MS/MS	By matching	By matching	By matching	By matching	By matching
AVMPDGQFK	LAPGFTAKAVMPDGQF	VMPDGQFKDISMSDYR	K	A	V	F	K	D	1	0	0	1	0	1	0	1	0	0	0	1	1	1	1	0	0	0	0	1	0	9	0	991.48	ACI67145.1;ACI68683.1;NP_001134858.1;ACI69176.1;ACI67901.1	ACI67145.1	19	27	yes	no	2	0.01823	68.371	By matching	By MS/MS	By MS/MS	By MS/MS	By MS/MS	By MS/MS	By matching	By matching
AVNLTELSLPQLEGLK	________________	LPQLEGLKTQLEQETE	M	A	V	L	K	T	1	0	1	0	0	1	2	1	0	0	5	1	0	0	1	1	1	0	0	1	0	16	0	1723.97	NP_001134282.1;ADM16270.1;ACI66909.1;ACM08735.1	NP_001134282.1	2	17	yes	no	2	0.0028799	86.488	By matching	By matching	By matching	By matching	By matching	By matching	By matching	By MS/MS
AVNYAGGYQEWSEK	ARGLGFQKAVNYAGGY	GYQEWSEKEGS_____	K	A	V	E	K	E	2	0	1	0	0	1	2	2	0	0	0	1	0	0	0	1	0	1	2	1	0	14	0	1600.72	ACM09285.1	ACM09285.1	103	116	yes	yes	2	5.4631e-18	201.3	By MS/MS	By MS/MS	By MS/MS	By matching	By MS/MS	By MS/MS	By MS/MS	By MS/MS
AVPEMTAALSK	GLVADLFKAVPEMTAA	EMTAALSK________	K	A	V	S	K	-	3	0	0	0	0	0	1	0	0	0	1	1	1	0	1	1	1	0	0	1	0	11	0	1116.58	ACH85298.1;ACI67395.1;ACI66876.1;ACI69862.1	ACH85298.1	322	332	yes	no	2	0.0065667	82.489	By MS/MS	By MS/MS	By MS/MS	By MS/MS	By MS/MS	By MS/MS	By MS/MS	By matching
AVPLALALISVSNPR	YGEPTLRRAVPLALAL	LISVSNPRLNILDTLS	R	A	V	P	R	L	3	1	1	0	0	0	0	0	0	1	3	0	0	0	2	2	0	0	0	2	0	15	0	1519.91	NP_001158789.1;ACN10471.1	NP_001158789.1	679	693	yes	no	2;3	0.0010731	90.412	By MS/MS	By matching	By matching	By matching	By MS/MS	By matching	By matching	By matching
AVQNLDDIK	TVMHGLDRAVQNLDDI	VQNLDDIKNAYSALSV	R	A	V	I	K	N	1	0	1	2	0	1	0	0	0	1	1	1	0	0	0	0	0	0	0	1	0	9	0	1014.53	ACN12702.1;ACN12371.1;ACN10342.1;ACN10024.1;ACI68762.1;CAA65948.1;ACM08711.1;ACI68214.1;ACI67180.1;CAA65954.1;CAA65951.1	ACM08711.1	75	83	no	no	2	3.3568e-07	197.27	By MS/MS	By MS/MS	By MS/MS	By MS/MS	By MS/MS	By MS/MS	By MS/MS	By MS/MS
AVRPQVLMR	PGRLRGIRAVRPQVLM	VRPQVLMRLSKTKKHV	R	A	V	M	R	L	1	2	0	0	0	1	0	0	0	0	1	0	1	0	1	0	0	0	0	2	0	9	1	1068.62	NP_001133164.1;ACN12523.1;ACN10170.1;ACH70849.1;ACN12395.1;ACN10048.1	NP_001133164.1	58	66	yes	no	2	0.0049838	136.27	By matching	By MS/MS	By MS/MS	By MS/MS	By MS/MS	By MS/MS	By MS/MS	By MS/MS
AVSAFAPICNPIQCAWGQK	LKNPGKYKAVSAFAPI	IQCAWGQKAFSGYLGK	K	A	V	Q	K	A	4	0	1	0	2	2	0	1	0	2	0	1	0	1	2	1	0	1	0	1	0	19	0	2117.02	NP_001135000.1;ACI69817.1	NP_001135000.1	168	186	yes	no	2	2.5315e-08	147.49	By matching	By matching	By MS/MS	By MS/MS	By matching	By MS/MS	By MS/MS	By matching
AVTCIDLTTLAGDDTPGNVHR	WQAAWLLRAVTCIDLT	DTPGNVHRLCMKATQP	R	A	V	H	R	L	2	1	1	3	1	0	0	2	1	1	2	0	0	0	1	0	4	0	0	2	0	21	0	2225.07	NP_001133307.1;ACI33005.1	NP_001133307.1	50	70	yes	no	3	0.039715	36.127	By matching	By matching	By matching	By matching	By matching	By matching	By matching	By MS/MS
AVTEQGGELSNEER	DDMAAAMKAVTEQGGE	GELSNEERNLLSVAYK	K	A	V	E	R	N	1	1	1	0	0	1	4	2	0	0	1	0	0	0	0	1	1	0	0	1	0	14	0	1517.7	ACI68704.1	ACI68704.1	28	41	yes	yes	2	1.2506e-12	191.63	By MS/MS	By matching	By MS/MS	By MS/MS	By MS/MS	By matching	By matching	By matching
AVVDSAYEVIK	EDWKATHKAVVDSAYE	DSAYEVIKLKGYTNWA	K	A	V	I	K	L	2	0	0	1	0	0	1	0	0	1	0	1	0	0	0	1	0	0	1	3	0	11	0	1192.63	NP_001133969.1;ACI34235.1	NP_001133969.1	234	244	yes	no	2	0.0011779	101.35	By MS/MS	By MS/MS	By matching	By matching	By MS/MS	By matching	By matching	By matching
AVVGEEALTSDDLLYLEFLQK	GKDVQAMKAVVGEEAL	LYLEFLQKFEKNFIAQ	K	A	V	Q	K	F	2	0	0	2	0	1	3	1	0	0	5	1	0	1	0	1	1	0	1	2	0	21	0	2352.21	NP_001135218.1;ACI33405.1	NP_001135218.1	427	447	yes	no	2	0.0033163	65.184	By matching	By MS/MS	By matching	By matching	By matching	By matching	By matching	By matching
AVVGGTSPYGTEDHIPCSVDK	YCSTDEAKAVVGGTSP	HIPCSVDKWFYYEKK_	K	A	V	D	K	W	1	0	0	2	1	0	1	3	1	1	0	1	0	0	2	2	2	0	1	3	0	21	0	2188.01	ACI66684.1	ACI66684.1	264	284	yes	yes	2;3	3.3987e-16	177.41	By MS/MS	By MS/MS	By matching	By MS/MS	By MS/MS	By MS/MS	By MS/MS	By MS/MS
AVVGVVAGGGR	KVIASANRAVVGVVAG	GVVAGGGRIDKPILKA	R	A	V	G	R	I	2	1	0	0	0	0	0	4	0	0	0	0	0	0	0	0	0	0	0	4	0	11	0	940.545	ACI70186.1;ACI68574.1;ACN12701.1;ACN12214.1;ACN10341.1;ACN09867.1;ACI69963.1;ACH70991.1;ACH70990.1;ACH70633.1	ACI70186.1	164	174	yes	no	2	8.9563e-05	139.98	By matching	By matching	By matching	By matching	By MS/MS	By matching	By matching	By MS/MS
AVVLMSHLGR	HCLDHGAKAVVLMSHL	VLMSHLGRPDGNPMPD	K	A	V	G	R	P	1	1	0	0	0	0	0	1	1	0	2	0	1	0	0	1	0	0	0	2	0	10	0	1081.61	NP_001133266.1;ACI32927.1;ACH70652.1;ACI70178.1;ACI68112.1	ACH70652.1	57	66	no	no	2	0.00031279	135.55	By MS/MS	By MS/MS	By matching	By matching	By MS/MS	By matching	By MS/MS	By MS/MS
AVVLMSHLGRPDGNPMPDK	HCLDHGAKAVVLMSHL	DGNPMPDKFSLKPVAA	K	A	V	D	K	F	1	1	1	2	0	0	0	2	1	0	2	1	2	0	3	1	0	0	0	2	0	19	1	2033.02	NP_001133266.1;ACI32927.1;ACH70652.1;ACI70178.1;ACI68112.1	ACH70652.1	57	75	no	no	2;3	3.8179e-15	188.9	By MS/MS	By MS/MS	By MS/MS	By MS/MS	By MS/MS	By MS/MS	By MS/MS	By MS/MS
AVVQVFEGTSGIDAK	VLEVIGTKAVVQVFEG	GTSGIDAKKTACEFTG	K	A	V	A	K	K	2	0	0	1	0	1	1	2	0	1	0	1	0	1	0	1	1	0	0	3	0	15	0	1519.79	NP_001135218.1;ACI33405.1	NP_001135218.1	84	98	yes	no	2	0.0013678	87.669	By MS/MS	By matching	By matching	By matching	By matching	By MS/MS	By matching	By matching
AVVYSNTIQSIMAIIK	EEECKQYRAVVYSNTI	QSIMAIIKAMANLKID	R	A	V	I	K	A	2	0	1	0	0	1	0	0	0	4	0	1	1	0	0	2	1	0	1	2	0	16	0	1749.97	NP_001136187.1;ACI34181.1;ACI32920.1	NP_001136187.1	71	86	yes	no	2	0.074695	66.826	By matching	By matching	By matching	By matching	By matching	By matching	By matching	By matching
AVWIQAQQLQGDALHQMQSLYGQHFPIEVR	________________	QHFPIEVRHYLSQWLE	M	A	V	V	R	H	3	1	0	1	0	7	1	2	2	2	3	0	1	1	1	1	0	1	1	2	0	30	0	3490.76	NP_001167288.1;ACN11286.1	NP_001167288.1	2	31	yes	no	3	4.9136e-08	95.666	By MS/MS	By MS/MS	By matching	By MS/MS	By MS/MS	By MS/MS	By MS/MS	By MS/MS
AVYVTEITDTMHFYTQDVETGTQLENLMETMR	KERTANYRAVYVTEIT	ENLMETMRAEIAAQPP	R	A	V	M	R	A	1	1	1	2	0	2	4	1	1	1	2	0	3	1	0	0	7	0	2	3	0	32	0	3765.72	ACN60284.1	ACN60284.1	625	656	yes	yes	3	5.3273e-06	83.435	By MS/MS	By MS/MS	By MS/MS	By MS/MS	By MS/MS	By MS/MS	By MS/MS	By MS/MS
AWDGYITNLMAGTPPFVQEAAICGSEAGK	________________	ICGSEAGKESVWAATP	M	A	W	G	K	E	5	0	1	1	1	1	2	4	0	2	1	1	1	1	2	1	2	1	1	1	0	29	0	3053.43	ACN12229.1;ACN09882.1;ACI68511.1;ACI66108.1	ACN12229.1	2	30	yes	no	3	0.00067619	62.069	By matching	By matching	By matching	By MS/MS	By matching	By matching	By matching	By matching
AWDLGVATMK	LGKGQVIKAWDLGVAT	DLGVATMKVGEISQLI	K	A	W	M	K	V	2	0	0	1	0	0	0	1	0	0	1	1	1	0	0	0	1	1	0	1	0	10	0	1090.55	NP_001133896.1;ACI34100.1	NP_001133896.1	85	94	yes	no	2	0.00067248	119.22	By MS/MS	By MS/MS	By MS/MS	By MS/MS	By MS/MS	By MS/MS	By MS/MS	By MS/MS
AWIDVLDSK	LDTPLPDRAWIDVLDS	WIDVLDSKDKSLKQKE	R	A	W	S	K	D	1	0	0	2	0	0	0	0	0	1	1	1	0	0	0	1	0	1	0	1	0	9	0	1045.54	ACI67199.1	ACI67199.1	59	67	yes	yes	2	0.0012989	114.97	By MS/MS	By MS/MS	By MS/MS	By MS/MS	By MS/MS	By MS/MS	By MS/MS	By MS/MS
AWTDSAVQHDIK	DAKRLIGRAWTDSAVQ	SAVQHDIKYFPFKVIE	R	A	W	I	K	Y	2	0	0	2	0	1	0	0	1	1	0	1	0	0	0	1	1	1	0	1	0	12	0	1369.66	NP_001135114.1;ACI33778.1	NP_001135114.1	100	111	yes	no	2	2.6368e-24	250.51	By MS/MS	By MS/MS	By MS/MS	By MS/MS	By MS/MS	By MS/MS	By MS/MS	By MS/MS
AWVWNTLADFADEHPKPELLAIR	KPNAGSDRAWVWNTLA	KPELLAIRFLNAENAQ	R	A	W	I	R	F	4	1	1	2	0	0	2	0	1	1	3	1	0	1	2	0	1	2	0	1	0	23	1	2691.38	NP_001133518.1;ACI33396.1;ACM09429.1	NP_001133518.1	119	141	yes	no	3;4	1.8296e-07	120.11	By matching	By MS/MS	By matching	By MS/MS	By matching	By MS/MS	By MS/MS	By MS/MS
AYADALEVVPSTLAENAGLNPISTVTELR	GMEAYCVRAYADALEV	ISTVTELRNRHAQGEK	R	A	Y	L	R	N	5	1	2	1	0	0	3	1	0	1	4	0	0	0	2	2	3	0	1	3	0	29	0	3013.56	NP_001133482.1;ACI33323.1;ACN58702.1	NP_001133482.1	448	476	yes	no	3	4.4672e-08	103.53	By MS/MS	By MS/MS	By MS/MS	By matching	By matching	By MS/MS	By MS/MS	By matching
AYAEELAR	GATDGIGKAYAEELAR	AYAEELARRGFSIVLI	K	A	Y	A	R	R	3	1	0	0	0	0	2	0	0	0	1	0	0	0	0	0	0	0	1	0	0	8	0	921.456	NP_001135118.1;ACN11404.1;ACI33951.1	NP_001135118.1	71	78	yes	no	2	0.011225	80.455	By MS/MS	By MS/MS	By matching	By MS/MS	By MS/MS	By matching	By matching	By matching
AYASWSETSILTR	AAVDSCSRAYASWSET	SETSILTRQQIFLRYQ	R	A	Y	T	R	Q	2	1	0	0	0	0	1	0	0	1	1	0	0	0	0	3	2	1	1	0	0	13	0	1483.73	NP_001136188.1;ACI34215.1	NP_001136188.1	79	91	yes	no	2	1.8662e-27	245.15	By MS/MS	By MS/MS	By MS/MS	By MS/MS	By MS/MS	By MS/MS	By MS/MS	By MS/MS
AYFSHWASVAPGSAPVK	LVVYPQTKAYFSHWAS	APGSAPVKKHGITIMN	K	A	Y	V	K	K	4	0	0	0	0	0	0	1	1	0	0	1	0	1	2	3	0	1	1	2	0	17	0	1773.88	ACN12530.1;ACN12436.1;ACN12341.1;ACN10613.1;ACN10089.1;ACN09994.1;ACI70156.1;ACI70141.1;ACI69601.1;ACI68785.1;ACI67225.1;ACI66666.1;CAA65946.1;CAA65944.1;ACI68793.1	ACN12530.1	42	58	yes	no	2;3	1.2278e-27	229.92	By MS/MS	By MS/MS	By MS/MS	By MS/MS	By MS/MS	By MS/MS	By MS/MS	By MS/MS
AYFSHWASVAPGSAPVKK	LVVYPQTKAYFSHWAS	PGSAPVKKHGITIMNQ	K	A	Y	K	K	H	4	0	0	0	0	0	0	1	1	0	0	2	0	1	2	3	0	1	1	2	0	18	1	1901.98	ACN12530.1;ACN12436.1;ACN12341.1;ACN10613.1;ACN10089.1;ACN09994.1;ACI70156.1;ACI70141.1;ACI69601.1;ACI68785.1;ACI67225.1;ACI66666.1;CAA65946.1;CAA65944.1;ACI68793.1	ACN12530.1	42	59	yes	no	2;3;4	8.5557e-12	184.92	By MS/MS	By MS/MS	By MS/MS	By MS/MS	By MS/MS	By MS/MS	By MS/MS	By MS/MS
AYFTQQVGADLPHQVEGELK	EKETQELRAYFTQQVG	HQVEGELKALEDRIRN	R	A	Y	L	K	A	2	0	0	1	0	3	2	2	1	0	2	1	0	1	1	0	1	0	1	2	0	20	0	2229.11	ACI33922.1;NP_001117114.1;AAZ73233.2	ACI33922.1	608	627	yes	no	2;3	2.0892e-66	300.5	By MS/MS	By MS/MS	By MS/MS	By MS/MS	By MS/MS	By MS/MS	By MS/MS	By MS/MS
AYFTQQVGADLPQQVEGELK	EKETQELRAYFTQQVG	QQVEGELKALEDRVRN	R	A	Y	L	K	A	2	0	0	1	0	4	2	2	0	0	2	1	0	1	1	0	1	0	1	2	0	20	0	2220.11	ACN11110.1	ACN11110.1	608	627	yes	yes	2;3	2.3047e-80	311.19	By MS/MS	By MS/MS	By MS/MS	By MS/MS	By MS/MS	By MS/MS	By MS/MS	By MS/MS
AYGELPEHAK	ADEARSLKAYGELPEH	GELPEHAKINETDTFG	K	A	Y	A	K	I	2	0	0	0	0	0	2	1	1	0	1	1	0	0	1	0	0	0	1	0	0	10	0	1113.55	ACI66646.1;AGH92564.1;ACM08311.1;ACI69866.1;ACI69267.1;ACI68974.2;ACI68600.1;ACI68357.1;ACI68111.1;ACI67610.1;ACI67552.1;ACI67186.1;ACI67070.1;ACI66587.1;ACI66529.1	ACI66646.1	105	114	yes	no	2	0.00088812	110.38	By matching	By matching	By matching	By MS/MS	By matching	By MS/MS	By MS/MS	By matching
AYGGAMCAK	KTKKHVSRAYGGAMCA	YGGAMCAKCVRDRIKR	R	A	Y	A	K	C	3	0	0	0	1	0	0	2	0	0	0	1	1	0	0	0	0	0	1	0	0	9	0	927.394	NP_001133164.1;ACN12523.1;ACN10170.1;ACH70849.1;ACN12395.1;ACN10048.1	NP_001133164.1	77	85	yes	no	2	0.0018275	105.14	By matching	By matching	By MS/MS	By MS/MS	By matching	By MS/MS	By MS/MS	By MS/MS
AYHEQLSVADITNACFEPANQMVK	APVISAEKAYHEQLSV	EPANQMVKCDPRHGKY	K	A	Y	V	K	C	4	0	2	1	1	2	2	0	1	1	1	1	1	1	1	1	1	0	1	2	0	24	0	2735.27	NP_001167032.1;ACI33964.1;ACH71025.1;ACN10869.1;ACH71026.1;NP_001134939.1;ACI69569.1	NP_001167032.1	281	304	no	no	3	2.3925e-11	138.66	By matching	By matching	By MS/MS	By MS/MS	By MS/MS	By MS/MS	By MS/MS	By MS/MS
AYHEQLSVAEITNSCFEPANQMVK	APVISAEKAYHEQLSV	EPANQMVKCDPRHGKY	K	A	Y	V	K	C	3	0	2	0	1	2	3	0	1	1	1	1	1	1	1	2	1	0	1	2	0	24	0	2765.28	NP_001133158.1;ACN10896.1;ACH70822.1	NP_001133158.1	281	304	yes	no	3	1.0755e-11	147.17	By MS/MS	By MS/MS	By MS/MS	By MS/MS	By MS/MS	By MS/MS	By MS/MS	By MS/MS
AYILNLVK	DRVLREERAYILNLVK	AYILNLVKQIKKAGCN	R	A	Y	V	K	Q	1	0	1	0	0	0	0	0	0	1	2	1	0	0	0	0	0	0	1	1	0	8	0	932.569	NP_001133482.1;ACI33323.1	NP_001133482.1	276	283	yes	no	2	0.0069069	85.265	By MS/MS	By matching	By matching	By matching	By MS/MS	By matching	By matching	By matching
AYILTCEYDVLR	AVLRSLPKAYILTCEY	TCEYDVLRDDGVMYAT	K	A	Y	L	R	D	1	1	0	1	1	0	1	0	0	1	2	0	0	0	0	0	1	0	2	1	0	12	0	1514.74	ACN11084.1	ACN11084.1	342	353	yes	yes	2	1.5545e-12	208.74	By MS/MS	By MS/MS	By MS/MS	By MS/MS	By MS/MS	By MS/MS	By MS/MS	By MS/MS
AYLADPTAFAVAAPVAAAETAAAPAAAK	FPLADKVKAYLADPTA	AAAPAAAKEEAKEESE	K	A	Y	A	K	E	15	0	0	1	0	0	1	0	0	0	1	1	0	1	3	0	2	0	1	2	0	28	0	2570.34	ACN12263.1;ACN09916.1;ACI70184.1;ACI68961.1	ACN12263.1	267	294	yes	no	2;3	6.0514e-14	142.25	By MS/MS	By MS/MS	By MS/MS	By MS/MS	By MS/MS	By MS/MS	By MS/MS	By MS/MS
AYLLADMAHISGLVAAK	KKLCTEVKAYLLADMA	ISGLVAAKAVPSPFKY	K	A	Y	A	K	A	5	0	0	1	0	0	0	1	1	1	3	1	1	0	0	1	0	0	1	1	0	17	0	1742.94	ACI34054.1	ACI34054.1	246	262	yes	yes	2;3	2.887e-13	180.56	By matching	By MS/MS	By MS/MS	By MS/MS	By MS/MS	By MS/MS	By MS/MS	By MS/MS
AYLPVNESFGFTADLR	GTPMFIVKAYLPVNES	FGFTADLRSNTGGQAF	K	A	Y	L	R	S	2	1	1	1	0	0	1	1	0	0	2	0	0	2	1	1	1	0	1	1	0	16	0	1798.89	ACN11358.1;ACN58670.1;NP_001133466.1;ACI33293.1;ACN10751.1;ACN11125.1;ACN58590.1	NP_001133466.1	786	801	no	no	2;3	1.4428e-08	159.64	By MS/MS	By MS/MS	By matching	By MS/MS	By matching	By MS/MS	By matching	By matching
AYLSIWTELQNYIK	QKHVDWVKAYLSIWTE	TELQNYIKQHHTTGLA	K	A	Y	I	K	Q	1	0	1	0	0	1	1	0	0	2	2	1	0	0	0	1	1	1	2	0	0	14	0	1740.91	NP_001133556.1;ACI33472.1	NP_001133556.1	180	193	yes	no	2	7.2678e-34	261.38	By matching	By matching	By matching	By matching	By matching	By matching	By matching	By matching
AYPDIAALSDNYWVVTDR	TYFNTSGRAYPDIAAL	NYWVVTDRVPIPWVSG	R	A	Y	D	R	V	3	1	1	3	0	0	0	0	0	1	1	0	0	0	1	1	1	1	2	2	0	18	0	2067.99	NP_001133559.1;ACI33477.1	NP_001133559.1	445	462	yes	no	2	1.1773e-37	251	By MS/MS	By MS/MS	By MS/MS	By MS/MS	By MS/MS	By MS/MS	By MS/MS	By MS/MS
AYPDQKPGTSGLR	KITVVKTKAYPDQKPG	KPGTSGLRKRVTVFQT	K	A	Y	L	R	K	1	1	0	1	0	1	0	2	0	0	1	1	0	0	2	1	1	0	1	0	0	13	1	1388.7	NP_001133130.1;ACH70746.1	NP_001133130.1	11	23	yes	no	2	0.0016237	109.95	By MS/MS	By MS/MS	By matching	By matching	By matching	By MS/MS	By matching	By matching
AYPLADATLSK	TEAEVNPKAYPLADAT	LADATLSKTILDLVQQ	K	A	Y	S	K	T	3	0	0	1	0	0	0	0	0	0	2	1	0	0	1	1	1	0	1	0	0	11	0	1148.61	ACI69124.1;ACI67639.1	ACI67639.1	10	20	no	no	2	0.00057778	108.9	By MS/MS	By MS/MS	By MS/MS	By MS/MS	By MS/MS	By MS/MS	By MS/MS	By MS/MS
AYTMADYLR	HGGQLNKKAYTMADYL	YTMADYLRKSGY____	K	A	Y	L	R	K	2	1	0	1	0	0	0	0	0	0	1	0	1	0	0	0	1	0	2	0	0	9	0	1102.51	ACM08604.1;ACI34313.1;ACN10854.1	ACM08604.1	127	135	no	no	2	0.00302	89.886	By MS/MS	By MS/MS	By MS/MS	By MS/MS	By MS/MS	By MS/MS	By matching	By matching
AYTPVSSDEDQGFVDLVVK	VNGSLVIRAYTPVSSD	GFVDLVVKVYYKNTHR	R	A	Y	V	K	V	1	0	0	3	0	1	1	1	0	0	1	1	0	1	1	2	1	0	1	4	0	19	0	2068	ACM08211.1	ACM08211.1	96	114	yes	yes	2	2.7399e-52	264.66	By MS/MS	By matching	By matching	By matching	By MS/MS	By MS/MS	By MS/MS	By matching
AYTYYDPK	RDAGMQLKAYTYYDPK	AYTYYDPKTCGFDFQG	K	A	Y	P	K	T	1	0	0	1	0	0	0	0	0	0	0	1	0	0	1	0	1	0	3	0	0	8	0	1019.46	ACI33481.1;ACI33023.1	ACI33481.1	175	182	yes	no	2	0.034748	62.464	By matching	By matching	By matching	By matching	By matching	By matching	By matching	By matching
AYVVLGQFLVLK	LEEKGFDKAYVVLGQF	LGQFLVLKKDEELFRD	K	A	Y	L	K	K	1	0	0	0	0	1	0	1	0	0	3	1	0	1	0	0	0	0	1	3	0	12	0	1348.81	AGH92524.1;ACM08201.1;ACI69661.1;ACI66267.1;ACI69910.1	AGH92524.1	43	54	yes	no	2	0.063456	65.695	By matching	By matching	By matching	By matching	By matching	By matching	By matching	By MS/MS
AYWQIEMSNVEVGNQLTLCK	HYVNVTRKAYWQIEMS	GNQLTLCKAGCQAIVD	K	A	Y	C	K	A	1	0	2	0	1	2	2	1	0	1	2	1	1	0	0	1	1	1	1	2	0	20	0	2382.13	ACI33365.1	ACI33365.1	260	279	yes	yes	2	1.1659e-06	126.9	By matching	By matching	By matching	By matching	By matching	By matching	By matching	By MS/MS
CAEQIGLPK	HMMIVAKKCAEQIGLP	AEQIGLPKGYRLILND	K	C	A	P	K	G	1	0	0	0	1	1	1	1	0	1	1	1	0	0	1	0	0	0	0	0	0	9	0	1014.52	NP_001134628.1;ACI68263.1	NP_001134628.1	84	92	yes	no	2	0.00064707	137.95	By MS/MS	By MS/MS	By MS/MS	By matching	By matching	By MS/MS	By MS/MS	By MS/MS
CCAAEDQAACFTEEAPK	KYHTMKDKCCAAEDQA	CFTEEAPKLVSESAEL	K	C	C	P	K	L	5	0	0	1	3	1	3	0	0	0	0	1	0	1	1	0	1	0	0	0	0	17	0	1956.77	P21848.1;NP_001117137.1;CAA36643.1;Q03156.1;NP_001117164.1;CAA43187.1	Q03156.1	581	597	no	no	2	1.7335e-61	289.59	By MS/MS	By MS/MS	By MS/MS	By MS/MS	By MS/MS	By matching	By MS/MS	By matching
CCLTYCFNKPEDK	FDRHYCGKCCLTYCFN	CFNKPEDK________	K	C	C	D	K	-	0	0	1	1	3	0	1	0	0	0	1	2	0	1	1	0	1	0	1	0	0	13	1	1733.72	ACM08345.1	ACM08345.1	144	156	no	no	3	0.00024433	108.98	By matching	By matching	By MS/MS	By MS/MS	By matching	By matching	By MS/MS	By MS/MS
CDTWTINSFADGESK	VGHAEKGKCDTWTINS	SFADGESKIDCQDAPT	K	C	D	S	K	I	1	0	1	2	1	0	1	1	0	1	0	1	0	1	0	2	2	1	0	0	0	15	0	1729.73	ACI33444.1;P80426.1;NP_001117127.1;AAA18838.1;P80429.1;ABC86976.1	ACI33444.1	353	367	yes	no	2	1.6716e-25	225.31	By MS/MS	By MS/MS	By MS/MS	By MS/MS	By MS/MS	By MS/MS	By MS/MS	By MS/MS
CEAAVEALK	VLSGRKERCEAAVEAL	EAAVEALKALVPVTTE	R	C	E	L	K	A	3	0	0	0	1	0	2	0	0	0	1	1	0	0	0	0	0	0	0	1	0	9	0	989.485	NP_001167124.1;ACN10888.1	NP_001167124.1	965	973	yes	no	2	0.01123	77.533	By MS/MS	By matching	By matching	By MS/MS	By matching	By MS/MS	By matching	By matching
CEAFGWNTYVVDGHDVEELCK	DMDVYRKRCEAFGWNT	HDVEELCKALWQAQQV	R	C	E	C	K	A	1	0	1	2	2	0	3	2	1	0	1	1	0	1	0	0	1	1	1	3	0	21	0	2527.08	NP_001134006.1;ACI34298.1	NP_001134006.1	206	226	yes	no	3	2.3018e-16	178.57	By MS/MS	By MS/MS	By MS/MS	By MS/MS	By MS/MS	By MS/MS	By MS/MS	By MS/MS
CEFQDAYVLLSEK	INTAKGQKCEFQDAYV	AYVLLSEKKISSVQSI	K	C	E	E	K	K	1	0	0	1	1	1	2	0	0	0	2	1	0	1	0	1	0	0	1	1	0	13	0	1600.74	ACN11370.1;ACI33148.1	ACI33148.1	237	249	no	no	2	1.767e-28	262.37	By MS/MS	By MS/MS	By MS/MS	By MS/MS	By MS/MS	By MS/MS	By MS/MS	By MS/MS
CEGINISGNFYR	GHKVVVVRCEGINISG	NISGNFYRNKLKYLAF	R	C	E	Y	R	N	0	1	2	0	1	0	1	2	0	2	0	0	0	1	0	1	0	0	1	0	0	12	0	1428.65	ACH85355.1;ACH85339.1;ACN12742.1;ACN12540.1;ACN10380.1;ACN10186.1;ACI67868.1;ACN12293.1;ACN09946.1;ACN12295.1;ACN09948.1	ACH85355.1	38	49	yes	no	2	5.7486e-09	182.25	By MS/MS	By matching	By MS/MS	By MS/MS	By MS/MS	By MS/MS	By MS/MS	By MS/MS
CELLYEGPGDDEAAMGIK	PVTAQKYRCELLYEGP	DEAAMGIKNCDPKAPL	R	C	E	I	K	N	2	0	0	2	1	0	3	3	0	1	2	1	1	0	1	0	0	0	1	0	0	18	0	1966.87	ACN11358.1;ACN58670.1;NP_001133466.1;ACI33293.1;ACN10751.1;ACN11125.1;ACN58590.1	NP_001133466.1	369	386	no	no	2	1.055e-37	252.37	By MS/MS	By MS/MS	By MS/MS	By MS/MS	By MS/MS	By MS/MS	By MS/MS	By MS/MS
CESAFLAK	VFQFLNAKCESAFLAK	CESAFLAKRNPRQINW	K	C	E	A	K	R	2	0	0	0	1	0	1	0	0	0	1	1	0	1	0	1	0	0	0	0	0	8	0	924.438	AGH92608.1;ACI66668.1;ACI67183.1	AGH92608.1	36	43	yes	no	2	0.0036466	93.143	By MS/MS	By matching	By MS/MS	By MS/MS	By matching	By MS/MS	By MS/MS	By matching
CEVYLDGGVR	VVSAVAGRCEVYLDGG	VYLDGGVRRGTDVLKA	R	C	E	V	R	R	0	1	0	1	1	0	1	2	0	0	1	0	0	0	0	0	0	0	1	2	0	10	0	1166.54	ACN12757.1;ACN10394.1;NP_001135240.1;ACI33762.1	ACN12757.1	286	295	yes	no	2	0.0011251	107.55	By matching	By matching	By matching	By matching	By MS/MS	By matching	By matching	By MS/MS
CFCTSVYAR	TLQEVKDRCFCTSVYA	FCTSVYARWRYNKVQN	R	C	F	A	R	W	1	1	0	0	2	0	0	0	0	0	0	0	0	1	0	1	1	0	1	1	0	9	0	1162.49	AAZ92542.1	AAZ92542.1	176	184	yes	yes	2	0.012272	76.17	By matching	By matching	By matching	By matching	By matching	By MS/MS	By MS/MS	By matching
CGLVPVMVEQYDADLCSAPGEASSYYAVAVAK	GEVYTAGKCGLVPVMV	YYAVAVAKKGSGLTWK	K	C	G	A	K	K	6	0	0	2	2	1	2	2	0	0	2	1	1	0	2	3	0	0	3	5	0	32	0	3419.57	ACI33444.1;P80426.1;NP_001117127.1;AAA18838.1;P80429.1	ACI33444.1	404	435	yes	no	3	4.2024e-09	107.75	By matching	By matching	By MS/MS	By MS/MS	By matching	By matching	By MS/MS	By matching
CHGLHAFIVPLR	AQLHTQGKCHGLHAFI	HAFIVPLRSMNTHIPL	K	C	H	L	R	S	1	1	0	0	1	0	0	1	2	1	2	0	0	1	1	0	0	0	0	1	0	12	0	1418.76	ACY82517.1	ACY82517.1	94	105	yes	yes	3	0.0003865	103.26	By MS/MS	By matching	By matching	By matching	By matching	By matching	By matching	By matching
CIAPITMSDVVLGQYVGDPEGEGDAK	DEKVKVLKCIAPITMS	PEGEGDAKLGYLDDPT	K	C	I	A	K	L	2	0	0	3	1	1	2	4	0	2	1	1	1	0	2	1	1	0	1	3	0	26	0	2720.27	NP_001135196.1;ACI33164.1	NP_001135196.1	298	323	yes	no	3	0.00044309	64.547	By matching	By matching	By matching	By MS/MS	By matching	By matching	By matching	By MS/MS
CKDDELTHLYTLILNPDQTYEVK	HLIKKEIKCKDDELTH	PDQTYEVKINNEKVES	K	C	K	V	K	I	0	0	1	3	1	1	2	0	1	1	4	2	0	0	1	0	3	0	2	1	0	23	1	2807.37	ACN10698.1;ACI32936.1	ACN10698.1	164	186	yes	no	3;4	1.4456e-20	190.25	By MS/MS	By MS/MS	By matching	By MS/MS	By MS/MS	By MS/MS	By MS/MS	By MS/MS
CLSALKDER	IGEAVFARCLSALKDE	LSALKDERVEASRSLA	R	C	L	E	R	V	1	1	0	1	1	0	1	0	0	0	2	1	0	0	0	1	0	0	0	0	0	9	1	1090.54	ACN10812.1	ACN10812.1	289	297	yes	yes	2	0.014875	102.06	By matching	By MS/MS	By matching	By MS/MS	By matching	By matching	By matching	By MS/MS
CLSISDWDR	DLGHFFIKCLSISDWD	LSISDWDRKTVGVCGE	K	C	L	D	R	K	0	1	0	2	1	0	0	0	0	1	1	0	0	0	0	2	0	1	0	0	0	9	0	1150.51	ACN12751.1;ACN10388.1;ACI70106.1;ACI69532.1;ACI67715.1;ACI66836.1	ACN12751.1	189	197	no	no	2	0.019191	67.113	By MS/MS	By matching	By matching	By matching	By matching	By MS/MS	By matching	By matching
CLVEDAGDVAFIK	YGYTGAFRCLVEDAGD	AGDVAFIKHTIVPEST	R	C	L	I	K	H	2	0	0	2	1	0	1	1	0	1	1	1	0	1	0	0	0	0	0	2	0	13	0	1435.7	ACI33444.1;P80426.1;NP_001117127.1;AAA18838.1;P80429.1;AAN17026.1	ACI33444.1	529	541	yes	no	2	1.3466e-05	143.55	By MS/MS	By MS/MS	By MS/MS	By MS/MS	By MS/MS	By MS/MS	By MS/MS	By MS/MS
CMALSTAILVGEACSWLPELVER	AFGAAGQRCMALSTAI	WLPELVERAKALRVNA	R	C	M	E	R	A	3	1	0	0	2	0	3	1	0	1	4	0	1	0	1	2	1	1	0	2	0	23	0	2604.28	ACI34202.1;ACN58716.1	ACI34202.1	308	330	yes	no	2;3	5.3268e-05	87.793	By MS/MS	By MS/MS	By MS/MS	By MS/MS	By MS/MS	By MS/MS	By MS/MS	By MS/MS
CMPTFHFYK	VAQHCEIKCMPTFHFY	MPTFHFYKNGEKVDDF	K	C	M	Y	K	N	0	0	0	0	1	0	0	0	1	0	0	1	1	2	1	0	1	0	1	0	0	9	0	1229.54	ADM16163.1;ADM16142.1;ACM09416.1;ACM09169.1;ACM09056.1;ACM08641.1;ACM08478.1;ACI68074.1;ACI66497.1;ACM08490.1;ACM08562.1;ACM09596.1;ACM09552.1;ACM08788.1;ACI69156.2;ADM16262.1;ADM15916.1;ACM09755.1;ACM09408.1;ACM09205.1;ACM09191.1;ACM09155.1;ACI69512.1	ADM16163.1	75	83	yes	no	2	0.00074144	134.48	By MS/MS	By matching	By MS/MS	By MS/MS	By MS/MS	By MS/MS	By MS/MS	By MS/MS
CMQLTDYVIK	KRQSMPFKCMQLTDYV	QLTDYVIKVPHSARQK	K	C	M	I	K	V	0	0	0	1	1	1	0	0	0	1	1	1	1	0	0	0	1	0	1	1	0	10	0	1269.61	NP_001134252.1;ACN12730.1;ACN12406.1;ACN12330.1;ACN10369.1;ACN10059.1;ACN09983.1;ACI66801.1	NP_001134252.1	54	63	yes	no	2	1.5293e-09	205.59	By MS/MS	By MS/MS	By MS/MS	By MS/MS	By MS/MS	By MS/MS	By MS/MS	By MS/MS
CNEVIGWLDK	DKTKILEKCNEVIGWL	EVIGWLDKNQTAEKEE	K	C	N	D	K	N	0	0	1	1	1	0	1	1	0	1	1	1	0	0	0	0	0	1	0	1	0	10	0	1232.59	NP_001133079.1;ACN10487.1;ACH70651.1	NP_001133079.1	574	583	yes	no	2	0.00030954	135.8	By matching	By matching	By matching	By MS/MS	By matching	By matching	By matching	By matching
CNNSTLQIK	KQVVYAFKCNNSTLQI	NNSTLQIKGKINSITL	K	C	N	I	K	G	0	0	2	0	1	1	0	0	0	1	1	1	0	0	0	1	1	0	0	0	0	9	0	1076.53	NP_001133556.1;ACI33472.1	NP_001133556.1	348	356	yes	no	2	0.034354	61.161	By matching	By matching	By matching	By matching	By matching	By matching	By matching	By matching
CNSAGKPVICATQMLESMVAHPR	AQKMMIGRCNSAGKPV	ESMVAHPRPTRAEGSD	R	C	N	P	R	P	3	1	1	0	2	1	1	1	1	1	1	1	2	0	2	2	1	0	0	2	0	23	1	2556.21	ACN11437.1	ACN11437.1	313	335	yes	yes	4	0.0066034	54.834	By matching	By matching	By MS/MS	By MS/MS	By MS/MS	By matching	By MS/MS	By matching
CPEALFQPSFLGMESCGIHETTYNSIMK	TIGNERFRCPEALFQP	TTYNSIMKCDVDIRKD	R	C	P	M	K	C	1	0	1	0	2	1	3	2	1	2	2	1	2	2	2	3	2	0	1	0	0	28	0	3246.45	O42161.1;NP_001116997.1;ACN11317.1;ACI33371.1;AAB65430.1;ACI67042.1	O42161.1	257	284	yes	no	3	4.1171e-11	130.98	By matching	By matching	By MS/MS	By MS/MS	By matching	By matching	By MS/MS	By MS/MS
CPFTGNVSIR	DGTYIDKKCPFTGNVS	FTGNVSIRGRILSGVV	K	C	P	I	R	G	0	1	1	0	1	0	0	1	0	1	0	0	0	1	1	1	1	0	0	1	0	10	0	1149.56	NP_001117010.1;ACN12270.1;ACN12201.1;ACN09923.1;ACN09854.1;ACI69474.1;ACI66733.1;AAG22824.1;ACI66431.1;ACI68815.1	NP_001117010.1	63	72	yes	no	2	0.0028777	88.134	By MS/MS	By matching	By matching	By MS/MS	By MS/MS	By MS/MS	By MS/MS	By MS/MS
CPSMSTPDSWGVTK	KPASGRPKCPSMSTPD	PDSWGVTKGHADLMQH	K	C	P	T	K	G	0	0	0	1	1	0	0	1	0	0	0	1	1	0	2	3	2	1	0	1	0	14	0	1551.67	NP_001133157.1;ACH70821.1	NP_001133157.1	359	372	yes	no	2	4.6738e-13	195.71	By MS/MS	By MS/MS	By MS/MS	By MS/MS	By MS/MS	By MS/MS	By MS/MS	By MS/MS
CQHAVHLINELIQTAQER	QVMGQPDRCQHAVHLI	LIQTAQERDGFGGSGG	R	C	Q	E	R	D	2	1	1	0	1	3	2	0	2	2	2	0	0	0	0	0	1	0	0	1	0	18	0	2159.09	ACH85319.1	ACH85319.1	91	108	yes	yes	2	0.060888	41.482	By matching	By matching	By matching	By matching	By matching	By matching	By matching	By matching
CQHSLGQPLPLK	SQGAEFVRCQHSLGQP	LGQPLPLKAPLVNSWP	R	C	Q	L	K	A	0	0	0	0	1	2	0	1	1	0	3	1	0	0	2	1	0	0	0	0	0	12	0	1376.72	ACN11110.1	ACN11110.1	201	212	yes	yes	2	0.016495	76.326	By matching	By matching	By matching	By matching	By matching	By matching	By matching	By matching
CSLIFANQTEK	GDPADNTKCSLIFANQ	IFANQTEKDILLRDEL	K	C	S	E	K	D	1	0	1	0	1	1	1	0	0	1	1	1	0	1	0	1	1	0	0	0	0	11	0	1309.63	ACM08211.1	ACM08211.1	207	217	yes	yes	2	0.00065221	107.97	By MS/MS	By matching	By matching	By MS/MS	By MS/MS	By MS/MS	By matching	By matching
CTGGEVGATSALAPK	ETKVVYMRCTGGEVGA	ATSALAPKIGPLGLSP	R	C	T	P	K	I	3	0	0	0	1	0	1	3	0	0	1	1	0	0	1	1	2	0	0	1	0	15	0	1417.69	ACI68370.1;ACH70859.1;ACM08535.1;NP_001134862.1;ACI69192.1	ACI68370.1	17	31	yes	no	2	3.0989e-18	200.97	By MS/MS	By MS/MS	By MS/MS	By MS/MS	By MS/MS	By MS/MS	By MS/MS	By MS/MS
CVFVIGPDK	DGIPLTARCVFVIGPD	VFVIGPDKKMKLSILY	R	C	V	D	K	K	0	0	0	1	1	0	0	1	0	1	0	1	0	1	1	0	0	0	0	2	0	9	0	1033.53	ACI67571.1	ACI67571.1	132	140	yes	yes	2	0.0012775	115.71	By MS/MS	By MS/MS	By MS/MS	By MS/MS	By MS/MS	By MS/MS	By MS/MS	By MS/MS
CVGIAEYDGNIYNPEGIDPK	YLHRYGAKCVGIAEYD	NPEGIDPKQLEDYKLQ	K	C	V	P	K	Q	1	0	2	2	1	0	2	3	0	3	0	1	0	0	2	0	0	0	2	1	0	20	0	2223.02	NP_001117108.1;CAD58714.1;ACI32916.1	NP_001117108.1	308	327	yes	no	2	1.1168e-22	209.73	By matching	By matching	By MS/MS	By MS/MS	By MS/MS	By MS/MS	By MS/MS	By MS/MS
CVGIAEYDGSIYNPEGIDPK	YLHRYGAKCVGIAEYD	NPEGIDPKQLEDYKLQ	K	C	V	P	K	Q	1	0	1	2	1	0	2	3	0	3	0	1	0	0	2	1	0	0	2	1	0	20	0	2196	CAD89353.1	CAD89353.1	310	329	yes	yes	2	7.1758e-16	178.43	By MS/MS	By matching	By matching	By MS/MS	By MS/MS	By matching	By matching	By matching
CVGNTLEVMESLECLK	RMNCPIGRCVGNTLEV	MESLECLKGRGPDDIL	R	C	V	L	K	G	0	0	1	0	2	0	3	1	0	0	3	1	1	0	0	1	1	0	0	2	0	16	0	1880.87	NP_001133751.1;ACI33838.1	NP_001133751.1	255	270	yes	no	2;3	1.3856e-54	292.76	By MS/MS	By MS/MS	By MS/MS	By MS/MS	By MS/MS	By MS/MS	By MS/MS	By MS/MS
CVVNVSSLCALQPLPSWVLYCTGK	PRRQGLRRCVVNVSSL	WVLYCTGKAARAMMFR	R	C	V	G	K	A	1	0	1	0	3	1	0	1	0	0	4	1	0	0	2	3	1	1	1	4	0	24	0	2750.36	NP_001133746.1;ACI33827.1	NP_001133746.1	165	188	yes	no	3	0.02312	38.669	By matching	By matching	By MS/MS	By matching	By matching	By matching	By matching	By matching
CWSMDLSELER	NYYLNEEKCWSMDLSE	MDLSELERSLAEARKH	K	C	W	E	R	S	0	1	0	1	1	0	2	0	0	0	2	0	1	0	0	2	0	1	0	0	0	11	0	1424.61	NP_001133370.1;ACI33102.1	NP_001133370.1	279	289	yes	no	2	2.986e-06	169.82	By MS/MS	By MS/MS	By MS/MS	By MS/MS	By MS/MS	By MS/MS	By MS/MS	By MS/MS
CYMGECGFR	ASFHSTSKCYMGECGF	YMGECGFRGGYMEVIN	K	C	Y	F	R	G	0	1	0	0	2	0	1	2	0	0	0	0	1	1	0	0	0	0	1	0	0	9	0	1178.43	NP_001133370.1;ACI33102.1	NP_001133370.1	381	389	yes	no	2	0.0022535	99.688	By matching	By matching	By matching	By matching	By matching	By matching	By MS/MS	By matching
DAAHFLDLPDFLSWK	NLRATCWRDAAHFLDL	LPDFLSWKATASLARS	R	D	A	W	K	A	2	0	0	3	0	0	0	0	1	0	3	1	0	2	1	1	0	1	0	0	0	15	0	1773.87	NP_001133658.1;ACI33652.1	NP_001133658.1	163	177	yes	no	2;3	3.2983e-05	130.47	By MS/MS	By MS/MS	By MS/MS	By MS/MS	By MS/MS	By MS/MS	By MS/MS	By MS/MS
DAAHLVNMDDPNVLEIWNLVFIQYNR	HFDRIGGRDAAHLVNM	LVFIQYNRESETELKP	R	D	A	N	R	E	2	1	4	3	0	1	1	0	1	2	3	0	1	1	1	0	0	1	1	3	0	26	0	3098.53	NP_001133550.1;ACI33457.1	NP_001133550.1	199	224	yes	no	3	5.0863e-05	76.049	By matching	By MS/MS	By matching	By matching	By matching	By matching	By matching	By MS/MS
DAAINSLLQMTEEL	IEAQQGNKDAAINSLL	LLQMTEEL________	K	D	A	E	L	-	2	0	1	1	0	1	2	0	0	1	3	0	1	0	0	1	1	0	0	0	0	14	0	1546.75	CAM88654.1;B5X370.1;ACI33751.1	CAM88654.1	251	264	yes	no	2	0.012011	66.246	By matching	By matching	By matching	By matching	By matching	By matching	By matching	By matching
DADDPNFFK	YSEVGGEKDADDPNFF	ADDPNFFKMVEGFFDR	K	D	A	F	K	M	1	0	1	3	0	0	0	0	0	0	0	1	0	2	1	0	0	0	0	0	0	9	0	1067.46	ACI33099.1;NP_001117025.1;CAD58715.1;CAD58716.1	ACI33099.1	46	54	yes	no	2	0.0027892	92.838	By MS/MS	By matching	By matching	By matching	By MS/MS	By matching	By matching	By matching
DAEAWFNEK	QLAEQNRKDAEAWFNE	AEAWFNEKSKELTTEI	K	D	A	E	K	S	2	0	1	1	0	0	2	0	0	0	0	1	0	1	0	0	0	1	0	0	0	9	0	1108.48	CON__P13645;CON__Q7Z3Z0;CON__Q7Z3Y8;CON__Q148H6;CON__Q7Z3Y7	CON__P13645	335	343	yes	no	2	0.0014309	110.38	By matching	By matching	By MS/MS	By matching	By matching	By matching	By matching	By matching
DAEDAMDAMDGALLDGR	FVRFHDNRDAEDAMDA	DGALLDGRELRVQMAR	R	D	A	G	R	E	4	1	0	5	0	0	1	2	0	0	2	0	2	0	0	0	0	0	0	0	0	17	0	1764.73	ACI66931.1;ACI34025.1	ACI66931.1	67	83	yes	no	2	1.2656e-19	207.21	By matching	By matching	By MS/MS	By matching	By MS/MS	By MS/MS	By matching	By matching
DAEDAVYELDGK	FVEFDDPRDAEDAVYE	AVYELDGKELCNERVT	R	D	A	G	K	E	2	0	0	3	0	0	2	1	0	0	1	1	0	0	0	0	0	0	1	1	0	12	0	1323.58	ACI33813.1	ACI33813.1	49	60	yes	yes	2	0.00029978	107.53	By matching	By matching	By MS/MS	By matching	By matching	By matching	By matching	By matching
DAELQNLLLDTFFSNAVQDCQDSWR	KIKEAFDRDAELQNLL	QDCQDSWRRTVSIGVQ	R	D	A	W	R	R	2	1	2	4	1	3	1	0	0	0	4	0	0	2	0	2	1	1	0	1	0	25	0	2984.36	ACN10812.1	ACN10812.1	383	407	yes	yes	2;3	6.7467e-38	241.6	By MS/MS	By MS/MS	By MS/MS	By MS/MS	By MS/MS	By MS/MS	By MS/MS	By MS/MS
DAFVTQGEEFSGR	ISGYQAIKDAFVTQGE	QGEEFSGRANYPMIMT	K	D	A	G	R	A	1	1	0	1	0	1	2	2	0	0	0	0	0	2	0	1	1	0	0	1	0	13	0	1441.65	ACN11468.1;ACI33595.1;ACN12519.1;ACN10166.1	ACN11468.1	92	104	yes	no	2	0.0031568	104.55	By matching	By matching	By matching	By matching	By matching	By MS/MS	By MS/MS	By matching
DAGPQGPVGSVYQK	HKESNKFRDAGPQGPV	PVGSVYQKTNAMSEIK	R	D	A	Q	K	T	1	0	0	1	0	2	0	3	0	0	0	1	0	0	2	1	0	0	1	2	0	14	0	1401.69	ACI33221.1	ACI33221.1	151	164	yes	yes	2	0.0074898	75.316	By matching	By matching	By matching	By matching	By matching	By matching	By matching	By matching
DAGQIAGLNVLR	DSQRQATKDAGQIAGL	IAGLNVLRVINEPTAA	K	D	A	L	R	V	2	1	1	1	0	1	0	2	0	1	2	0	0	0	0	0	0	0	0	1	0	12	0	1225.68	ACN11027.1;ACN60239.1	ACN11027.1	206	217	no	no	2	1.6385e-09	193.62	By MS/MS	By matching	By MS/MS	By MS/MS	By MS/MS	By MS/MS	By MS/MS	By matching
DAGTISGLNVLR	DSQRQATKDAGTISGL	ISGLNVLRIINEPTAA	K	D	A	L	R	I	1	1	1	1	0	0	0	2	0	1	2	0	0	0	0	1	1	0	0	1	0	12	0	1214.66	ACI33977.1;NP_001133079.1;ACN10487.1;ACH70651.1;ACN11074.1	NP_001133079.1	160	171	no	no	2	2.2668e-12	203.51	By MS/MS	By MS/MS	By MS/MS	By MS/MS	By MS/MS	By MS/MS	By MS/MS	By MS/MS
DAGVIAGLNVMR	DAQRQATKDAGVIAGL	IAGLNVMRIINEPTAA	K	D	A	M	R	I	2	1	1	1	0	0	0	2	0	1	1	0	1	0	0	0	0	0	0	2	0	12	0	1214.64	NP_001135114.1;ACI33778.1	NP_001135114.1	184	195	yes	no	2	5.2631e-07	166.11	By MS/MS	By MS/MS	By MS/MS	By MS/MS	By MS/MS	By MS/MS	By MS/MS	By MS/MS
DAGYEFDVCYTSVLK	RRGGQALKDAGYEFDV	VCYTSVLKRAIRTLWL	K	D	A	L	K	R	1	0	0	2	1	0	1	1	0	0	1	1	0	1	0	1	1	0	2	2	0	15	0	1765.79	NP_001133249.1;ACI32899.1	NP_001133249.1	47	61	yes	no	2	0.00011196	123.72	By matching	By matching	By matching	By matching	By matching	By matching	By MS/MS	By matching
DAIILIFANK	IINDREMRDAIILIFA	IILIFANKQDLPDAMK	R	D	A	N	K	Q	2	0	1	1	0	0	0	0	0	3	1	1	0	1	0	0	0	0	0	0	0	10	0	1116.65	ACI33167.1;ACI34125.1	ACI33167.1	114	123	yes	no	2	0.00021475	142.98	By matching	By MS/MS	By matching	By matching	By MS/MS	By matching	By matching	By matching
DAIQAIVDELEEMISEDITLDAR	EHKATAAKDAIQAIVD	EDITLDARVHARIIGA	K	D	A	A	R	V	3	1	0	4	0	1	4	0	0	4	2	0	1	0	0	1	1	0	0	1	0	23	0	2588.25	NP_001167124.1;ACN10888.1	NP_001167124.1	1118	1140	yes	no	3	0.076716	15.546	By matching	By matching	By matching	By MS/MS	By matching	By matching	By matching	By matching
DAIQLVSTR	ALSLHGVKDAIQLVST	AIQLVSTREEVEDLCR	K	D	A	T	R	E	1	1	0	1	0	1	0	0	0	1	1	0	0	0	0	1	1	0	0	1	0	9	0	1001.55	NP_001167302.1;ACN11321.1	NP_001167302.1	516	524	yes	no	2	0.041745	58.63	By matching	By matching	By matching	By MS/MS	By matching	By matching	By matching	By matching
DALDVMELLHQMGPDTVVLTSTDLASPHGDQFLVALGSQK	GRTISTEKDALDVMEL	LVALGSQKMVRPDGSK	K	D	A	Q	K	M	3	0	0	5	0	3	1	3	2	0	7	1	2	1	2	3	3	0	0	4	0	40	0	4248.11	ACY30366.1;ACI33864.1;ACI33126.1	ACY30366.1	115	154	yes	no	3;4	1.0125e-12	98.009	By MS/MS	By MS/MS	By MS/MS	By MS/MS	By MS/MS	By MS/MS	By MS/MS	By MS/MS
DALMEVMPYVDVLFGNETEAATFSK	PFISQFFKDALMEVMP	TEAATFSKEQGFQTED	K	D	A	S	K	E	3	0	1	2	0	0	3	1	0	0	2	1	2	2	1	1	2	0	1	3	0	25	0	2776.3	NP_001135164.1;ACH70824.1	NP_001135164.1	246	270	yes	no	2;3	6.3262e-21	176.65	By MS/MS	By MS/MS	By MS/MS	By MS/MS	By MS/MS	By MS/MS	By MS/MS	By MS/MS
DALNQAMDEELER	VAVQVNVRDALNQAMD	AMDEELERDERVFLLG	R	D	A	E	R	D	2	1	1	2	0	1	3	0	0	0	2	0	1	0	0	0	0	0	0	0	0	13	0	1532.68	ACI34116.1	ACI34116.1	37	49	yes	yes	2	1.7887e-08	174.95	By matching	By matching	By matching	By matching	By MS/MS	By matching	By matching	By matching
DALSDLALHFLNK	LIQKSILRDALSDLAL	LALHFLNKMKIMVVKE	R	D	A	N	K	M	2	0	1	2	0	0	0	0	1	0	4	1	0	1	0	1	0	0	0	0	0	13	0	1455.77	NP_001133482.1;ACI33323.1	NP_001133482.1	302	314	yes	no	2;3	1.0681e-07	168.98	By MS/MS	By MS/MS	By MS/MS	By MS/MS	By MS/MS	By MS/MS	By MS/MS	By MS/MS
DAMDAMNGQSLDGR	YDNPEDAKDAMDAMNG	NGQSLDGRTIRVNEAG	K	D	A	G	R	T	2	1	1	3	0	1	0	2	0	0	1	0	2	0	0	1	0	0	0	0	0	14	0	1479.61	ACM08990.1;ACI70202.2;ADM15872.1;ACI68319.1;NP_001133190.1;ACH70924.1;ACM08434.1;ACH85335.1;NP_001117016.1;AAO32675.1	ACM08990.1	61	74	yes	no	2	2.8938e-33	253.06	By MS/MS	By MS/MS	By MS/MS	By MS/MS	By MS/MS	By MS/MS	By MS/MS	By MS/MS
DAMLFPSFIHSQK	NTPIFFIRDAMLFPSF	PSFIHSQKRNPQTHLK	R	D	A	Q	K	R	1	0	0	1	0	1	0	0	1	1	1	1	1	2	1	2	0	0	0	0	0	13	0	1519.75	NP_001133774.1;ACI33877.1;ACI69791.1	NP_001133774.1	157	169	no	no	2;3	1.3762e-05	143.31	By matching	By matching	By MS/MS	By MS/MS	By matching	By MS/MS	By matching	By MS/MS
DAMLFPSFVHSQK	NTPIFFIRDAMLFPSF	PSFVHSQKRNPQTHLK	R	D	A	Q	K	R	1	0	0	1	0	1	0	0	1	0	1	1	1	2	1	2	0	0	0	1	0	13	0	1505.73	ACN11170.1	ACN11170.1	157	169	yes	yes	2;3	8.0363e-15	206.74	By MS/MS	By MS/MS	By MS/MS	By MS/MS	By MS/MS	By MS/MS	By MS/MS	By MS/MS
DASLPGILEDEANYLYISDAFHK	LEDLFSPKDASLPGIL	YISDAFHKAFLEVNEE	K	D	A	H	K	A	3	0	1	3	0	0	2	1	1	2	3	1	0	1	1	2	0	0	2	0	0	23	0	2580.24	NP_001117104.1;CAB64714.1	NP_001117104.1	368	390	yes	no	3	0.00023872	79.565	By MS/MS	By MS/MS	By MS/MS	By MS/MS	By MS/MS	By MS/MS	By MS/MS	By MS/MS
DASVVGFFADDGSPAK	FTKYVGDRDASVVGFF	ADDGSPAKAEFLKSAS	R	D	A	A	K	A	3	0	0	3	0	0	0	2	0	0	0	1	0	2	1	2	0	0	0	2	0	16	0	1581.73	ACN10701.1;ACI33158.1	ACN10701.1	142	157	yes	no	2	2.5209e-34	254.45	By MS/MS	By MS/MS	By MS/MS	By MS/MS	By MS/MS	By MS/MS	By MS/MS	By MS/MS
DASVVGFFADGGSPAQAEFLK	FTKYVGDRDASVVGFF	PAQAEFLKSASALRES	R	D	A	L	K	S	4	0	0	2	0	1	1	3	0	0	1	1	0	3	1	2	0	0	0	2	0	21	0	2112.02	ACI34304.1;NP_001161991.1;ACS28414.1	NP_001161991.1	142	162	no	no	2;3	6.45e-113	353.12	By MS/MS	By MS/MS	By MS/MS	By MS/MS	By MS/MS	By MS/MS	By MS/MS	By MS/MS
DASWVNLK	YSPLGTSRDASWVNLK	DASWVNLKSPPLLEDE	R	D	A	L	K	S	1	0	1	1	0	0	0	0	0	0	1	1	0	0	0	1	0	1	0	1	0	8	0	931.476	NP_001139958.1;ACM08888.1	NP_001139958.1	227	234	yes	no	2	0.00012449	117.81	By MS/MS	By matching	By matching	By MS/MS	By MS/MS	By matching	By MS/MS	By matching
DATNVGDEGGFAPNILENNEALELLK	VIKAKYGKDATNVGDE	NEALELLKTAIEKAGY	K	D	A	L	K	T	3	0	4	2	0	0	4	3	0	1	4	1	0	1	1	0	1	0	0	1	0	26	0	2742.33	NP_001133193.1;B5DGQ7.1;ACH70932.1;ACH70931.1;NP_001135172.1;ACH70930.1	NP_001133193.1	203	228	yes	no	2;3	3.0602e-34	219.18	By MS/MS	By MS/MS	By MS/MS	By MS/MS	By MS/MS	By MS/MS	By MS/MS	By MS/MS
DAVALCELFAWLEK	GMKMAHIKDAVALCEL	ELFAWLEKEIPKGTVT	K	D	A	E	K	E	3	0	0	1	1	0	2	0	0	0	3	1	0	1	0	0	0	1	0	1	0	14	0	1663.83	NP_001135239.1;ACI33755.1	NP_001135239.1	343	356	yes	no	2	4.3623e-13	195.87	By MS/MS	By MS/MS	By MS/MS	By MS/MS	By MS/MS	By MS/MS	By MS/MS	By MS/MS
DAVDYIIYGTVIQEVK	LHKTSLPKDAVDYIIY	GTVIQEVKTSNVAREA	K	D	A	V	K	T	1	0	0	2	0	1	1	1	0	3	0	1	0	0	0	0	1	0	2	3	0	16	0	1824.95	ACN10637.1	ACN10637.1	96	111	yes	yes	2;3	4.2616e-09	171.26	By MS/MS	By MS/MS	By MS/MS	By MS/MS	By MS/MS	By MS/MS	By MS/MS	By MS/MS
DAVGMSLIK	TIKEHIKKDAVGMSLI	AVGMSLIKGVDEGPEG	K	D	A	I	K	G	1	0	0	1	0	0	0	1	0	1	1	1	1	0	0	1	0	0	0	1	0	9	0	932.5	NP_001117111.1;ACH70721.1;AAK07737.1	NP_001117111.1	112	120	yes	no	2	0.0029993	90.15	By MS/MS	By MS/MS	By MS/MS	By MS/MS	By MS/MS	By MS/MS	By matching	By matching
DAVLLVFANK	MLAEDELRDAVLLVFA	VLLVFANKQDLPNAMN	R	D	A	N	K	Q	2	0	1	1	0	0	0	0	0	0	2	1	0	1	0	0	0	0	0	2	0	10	0	1088.62	NP_001167030.1;ACI33892.1;ACH70742.1;ADM15998.1;ACN12456.1;ACN10107.1;ACM09631.1;ACM08362.1;ACI66412.1;ACI33932.1	NP_001167030.1	118	127	yes	no	2	0.00015181	147.75	By MS/MS	By MS/MS	By matching	By matching	By MS/MS	By MS/MS	By matching	By matching
DAVTHNQLAAFGEYVAEMLPK	TKPTVRPKDAVTHNQL	YVAEMLPKYVQQVQVT	K	D	A	P	K	Y	4	0	1	1	0	1	2	1	1	0	2	1	1	1	1	0	1	0	1	2	0	21	0	2303.13	ACI69869.1	ACI69869.1	44	64	yes	yes	3	0.0042186	62.739	By MS/MS	By MS/MS	By matching	By matching	By MS/MS	By matching	By MS/MS	By matching
DAYSGGQVNLYHVHSEGWTR	AIYQATYRDAYSGGQV	VHSEGWTRVSQSDVLM	R	D	A	T	R	V	1	1	1	1	0	1	1	3	2	0	1	0	0	0	0	2	1	1	2	2	0	20	0	2275.04	ACH85299.1;AGH92509.1;ACM09015.1;ACM08758.1;ACM08263.1;ADM16042.1;ACI67172.1	ACH85299.1	232	251	yes	no	3;4	2.2596e-05	107.98	By matching	By MS/MS	By matching	By matching	By MS/MS	By MS/MS	By MS/MS	By MS/MS
DCDPNTGEPDDDGYDDEYVLEDLEVTVADHIQK	CTLKYLVKDCDPNTGE	TVADHIQKVLKPNFAA	K	D	C	Q	K	V	1	0	1	9	1	1	4	2	1	1	2	1	0	0	2	0	2	0	2	3	0	33	0	3780.57	NP_001133706.1;ACI33742.1	NP_001133706.1	733	765	yes	no	3	0.00048677	58.47	By MS/MS	By matching	By MS/MS	By MS/MS	By matching	By matching	By matching	By matching
DCELENAVR	KSPLIIFKDCELENAV	CELENAVRGALMANFL	K	D	C	V	R	G	1	1	1	1	1	0	2	0	0	0	1	0	0	0	0	0	0	0	0	1	0	9	0	1104.49	NP_001133574.1;ACN10881.1;ACI33507.1	NP_001133574.1	276	284	yes	no	2	0.00078498	132.88	By MS/MS	By MS/MS	By MS/MS	By MS/MS	By MS/MS	By MS/MS	By matching	By matching
DCFITLVR	NEVSGTLKDCFITLVR	DCFITLVRVAKNPQLY	K	D	C	V	R	V	0	1	0	1	1	0	0	0	0	1	1	0	0	1	0	0	1	0	0	1	0	8	0	1022.52	ACI33142.1	ACI33142.1	234	241	yes	yes	2	0.00044864	135.83	By matching	By matching	By matching	By matching	By matching	By matching	By MS/MS	By matching
DCGGAAAILGAFK	TNMPGMKRDCGGAAAI	AAILGAFKATVKQGFK	R	D	C	F	K	A	4	0	0	1	1	0	0	3	0	1	1	1	0	1	0	0	0	0	0	0	0	13	0	1249.61	NP_001133677.1;ACI33685.1	NP_001133677.1	283	295	yes	no	2	0.0096608	84.169	By matching	By matching	By matching	By matching	By matching	By matching	By MS/MS	By matching
DCGVEWVILGHSER	EISPVMIKDCGVEWVI	VILGHSERRHVFGESD	K	D	C	E	R	R	0	1	0	1	1	0	2	2	1	1	1	0	0	0	0	1	0	1	0	2	0	14	0	1655.77	ACN12560.1;ACN10206.1;ACI68030.1;ACI68071.1	ACN12560.1	85	98	yes	no	3	0.00019352	112.5	By matching	By matching	By MS/MS	By matching	By MS/MS	By matching	By matching	By MS/MS
DCVGPDVEQACADPAAGSVILLENLR	GKDVHFLKDCVGPDVE	VILLENLRFHVAEEGK	K	D	C	L	R	F	4	1	1	3	2	1	2	2	0	1	3	0	0	0	2	1	0	0	0	3	0	26	0	2768.31	NP_001133266.1;ACI32927.1	NP_001133266.1	98	123	yes	no	3	1.6421e-19	166.65	By MS/MS	By MS/MS	By MS/MS	By MS/MS	By MS/MS	By MS/MS	By MS/MS	By MS/MS
DDADFFLAVFNQALHNYMEDHH	KPPMCITRDDADFFLA	HNYMEDHH________	R	D	D	H	H	-	3	0	2	4	0	1	1	0	3	0	2	0	1	3	0	0	0	0	1	1	0	22	0	2648.14	ACI33568.1	ACI33568.1	497	518	yes	yes	3;4	1.2327e-05	104.16	By MS/MS	By MS/MS	By MS/MS	By MS/MS	By MS/MS	By MS/MS	By MS/MS	By MS/MS
DDELTHLYTLILNPDQTYEVK	IKKEIKCKDDELTHLY	PDQTYEVKINNEKVES	K	D	D	V	K	I	0	0	1	3	0	1	2	0	1	1	4	1	0	0	1	0	3	0	2	1	0	21	0	2519.24	ACN10698.1;ACI32936.1	ACN10698.1	166	186	yes	no	3	9.0379e-07	120.9	By MS/MS	By matching	By matching	By matching	By matching	By MS/MS	By MS/MS	By matching
DDESMYLEAK	KRAVVHYRDDESMYLE	ESMYLEAKKDRVTVVF	R	D	D	A	K	K	1	0	0	2	0	0	2	0	0	0	1	1	1	0	0	1	0	0	1	0	0	10	0	1199.5	ACH70809.1	ACH70809.1	148	157	yes	yes	2	0.0066551	121.61	By matching	By matching	By MS/MS	By matching	By matching	By matching	By matching	By matching
DDEVQVVR	ARSMPIRKDDEVQVVR	DDEVQVVRGHYKGQQI	K	D	D	V	R	G	0	1	0	2	0	1	1	0	0	0	0	0	0	0	0	0	0	0	0	3	0	8	0	958.472	NP_001232770.1;NP_001134094.1;AGH92510.1;ACI66840.1;ACI66213.1;ACH70982.1;ACH70981.1;ACI68272.1	NP_001232770.1	52	59	yes	no	2	0.016682	74.376	By matching	By matching	By MS/MS	By matching	By matching	By matching	By matching	By matching
DDGTVIHFNNPK	IEEVNMIKDDGTVIHF	VIHFNNPKVQASLSAN	K	D	D	P	K	V	0	0	2	2	0	0	0	1	1	1	0	1	0	1	1	0	1	0	0	1	0	12	0	1355.65	ACN12433.1;ACN10086.1;ACI69060.1	ACN12433.1	62	73	yes	no	2	0.025714	62.799	By matching	By matching	By matching	By matching	By matching	By matching	By matching	By matching
DDGTYYEFGEDIPEAPER	LKEHDIKKDDGTYYEF	DIPEAPERLMTDAIGE	K	D	D	E	R	L	1	1	0	3	0	0	4	2	0	1	0	0	0	1	2	0	1	0	2	0	0	18	0	2101.88	NP_001133698.1;ACI33721.1	NP_001133698.1	419	436	yes	no	2	3.5834e-07	151.39	By matching	By MS/MS	By matching	By MS/MS	By matching	By matching	By matching	By MS/MS
DDHGKPFVLDCVR	NLGVGAYRDDHGKPFV	PFVLDCVRKAEALISS	R	D	D	V	R	K	0	1	0	3	1	0	0	1	1	0	1	1	0	1	1	0	0	0	0	2	0	13	1	1556.74	ACI34022.1	ACI34022.1	67	79	yes	yes	2;3	6.3028e-10	186.51	By MS/MS	By MS/MS	By MS/MS	By MS/MS	By MS/MS	By MS/MS	By MS/MS	By MS/MS
DDIEDEHLNDYFSQFGEIEK	KIFIGGLKDDIEDEHL	SQFGEIEKAEVIAEKE	K	D	D	E	K	A	0	0	1	4	0	1	4	1	1	2	1	1	0	2	0	1	0	0	1	0	0	20	0	2442.05	CAG14940.1	CAG14940.1	44	63	yes	yes	3	3.1053e-05	115.2	By matching	By matching	By matching	By matching	By matching	By matching	By MS/MS	By matching
DDLFNTNATIVATLADAVAR	PRKPGMTRDDLFNTNA	TLADAVARNCPEAMIC	R	D	D	A	R	N	5	1	2	3	0	0	0	0	0	1	2	0	0	1	0	0	3	0	0	2	0	20	0	2090.06	NP_001133198.1;ACI68017.1;ACH70949.1;ACH70948.1;NP_001135174.1;ACI66104.1;ACI67899.1;ACI68220.1;ACI66609.1	NP_001133198.1	111	130	no	no	2;3	8.108e-96	340.33	By MS/MS	By MS/MS	By MS/MS	By MS/MS	By MS/MS	By MS/MS	By MS/MS	By MS/MS
DDNPVVFLENELMYGVPFDLSEEVMHK	GLLKAAIRDDNPVVFL	LSEEVMHKDFVLPIGK	R	D	D	H	K	D	0	0	2	3	0	0	4	1	1	0	3	1	2	2	2	1	0	0	1	4	0	27	0	3165.47	ACI34116.1	ACI34116.1	224	250	yes	yes	3	2.0647e-42	232.87	By MS/MS	By MS/MS	By MS/MS	By MS/MS	By MS/MS	By MS/MS	By MS/MS	By MS/MS
DDPSKPVHLTAFLGYK	GKVKSFPKDDPSKPVH	LTAFLGYKAGMTHIVR	K	D	D	Y	K	A	1	0	0	2	0	0	0	1	1	0	2	2	0	1	2	1	1	0	1	1	0	16	1	1786.93	NP_001135078.1;ACN12548.1;ACN10194.1;ACI70187.1;ACI70123.1;ACI67106.1;ACI66814.1;ACI70155.1;ACI68315.1;ACH70870.1;ACI67167.1	NP_001135078.1	35	50	yes	no	2;3	0.0013198	115.8	By MS/MS	By MS/MS	By MS/MS	By MS/MS	By matching	By MS/MS	By MS/MS	By MS/MS
DDSIVCNIGHFDCEIDMNWLNANAAEK	GKHFEHMKDDSIVCNI	LNANAAEKINIKPQVD	K	D	D	E	K	I	3	0	4	4	2	0	2	1	1	3	1	1	1	1	0	1	0	1	0	1	0	27	0	3150.35	NP_001135793.1;NP_001133847.1;ACN10496.1;ACI34009.1;ACH70814.1	NP_001135793.1	293	319	yes	no	3	1.8156e-19	161.04	By MS/MS	By MS/MS	By MS/MS	By MS/MS	By MS/MS	By MS/MS	By MS/MS	By MS/MS
DDTIHEDGDVK	FNKIGLMRDDTIHEDG	IHEDGDVKEALRRLPE	R	D	D	V	K	E	0	0	0	4	0	0	1	1	1	1	0	1	0	0	0	0	1	0	0	1	0	11	0	1242.54	ADM16071.1;ACI66687.1	ADM16071.1	34	44	yes	no	2	0.00031202	120.86	By matching	By matching	By MS/MS	By matching	By matching	By matching	By matching	By matching
DDVGLSLVK	TLQFADSKDDVGLSLV	DVGLSLVKEGMVMVDV	K	D	D	V	K	E	0	0	0	2	0	0	0	1	0	0	2	1	0	0	0	1	0	0	0	2	0	9	0	944.518	ACN60284.1	ACN60284.1	791	799	yes	yes	2	0.0003555	148.69	By MS/MS	By matching	By matching	By MS/MS	By MS/MS	By matching	By MS/MS	By MS/MS
DDYGPDYLDK	EKMPQQVRDDYGPDYL	YGPDYLDKVDVMMREK	R	D	D	D	K	V	0	0	0	4	0	0	0	1	0	0	1	1	0	0	1	0	0	0	2	0	0	10	0	1199.5	ACI67927.1	ACI67927.1	236	245	yes	yes	2	0.00069553	118.28	By matching	By matching	By matching	By matching	By matching	By matching	By matching	By matching
DDYGPDYLDKVDVMMR	EKMPQQVRDDYGPDYL	DKVDVMMREKLAKMSD	R	D	D	M	R	E	0	1	0	5	0	0	0	1	0	0	1	1	2	0	1	0	0	0	2	2	0	16	1	1930.84	ACI67927.1	ACI67927.1	236	251	yes	yes	3	0.029314	64.244	By matching	By matching	By MS/MS	By matching	By matching	By matching	By matching	By matching
DEAPDVLCLQETK	KKGLDWVRDEAPDVLC	VLCLQETKCAEKSLPD	R	D	E	T	K	C	1	0	0	2	1	1	2	0	0	0	2	1	0	0	1	0	1	0	0	1	0	13	0	1516.71	NP_001135227.1;ACI33574.1;ACI33549.1;ACH70702.1	NP_001135227.1	81	93	yes	no	2	1.8048e-05	139.86	By MS/MS	By matching	By matching	By matching	By MS/MS	By matching	By matching	By matching
DEFPWEKPKPLQF	ACYGHFGRDEFPWEKP	EKPKPLQF________	R	D	E	Q	F	-	0	0	0	1	0	1	2	0	0	0	1	2	0	2	3	0	0	1	0	0	0	13	2	1659.83	NP_001158767.1;ACN12736.1;ACN10374.1	NP_001158767.1	378	390	yes	no	2	0.022091	121.56	By matching	By matching	By MS/MS	By MS/MS	By matching	By matching	By MS/MS	By MS/MS
DEGWLAEHMLILGITNPQGVK	RIASRIAKDEGWLAEH	ITNPQGVKRYVAAAFP	K	D	E	V	K	R	1	0	1	1	0	1	2	3	1	2	3	1	1	0	1	0	1	1	0	1	0	21	0	2320.19	ACI33922.1;NP_001117114.1;AAZ73233.2	ACI33922.1	266	286	yes	no	2;3	1.4833e-11	160.67	By MS/MS	By MS/MS	By MS/MS	By MS/MS	By MS/MS	By MS/MS	By MS/MS	By MS/MS
DEGWLAEHMLILGITNPR	RIASRIAKDEGWLAEH	ILGITNPRGVKRYVAA	K	D	E	P	R	G	1	1	1	1	0	0	2	2	1	2	3	0	1	0	1	0	1	1	0	0	0	18	0	2064.05	ACN11110.1	ACN11110.1	266	283	yes	yes	2;3	5.0672e-20	208.49	By MS/MS	By MS/MS	By MS/MS	By MS/MS	By MS/MS	By MS/MS	By MS/MS	By MS/MS
DELILEGNDIELVSNSAALIQQATTVK	CAVSAAQKDELILEGN	IQQATTVKNKDIRKFL	K	D	E	V	K	N	3	0	2	2	0	2	3	1	0	3	4	1	0	0	0	2	2	0	0	2	0	27	0	2883.51	NP_001133089.1;ADM16080.1;ADM15976.1;ACN12697.1;ACN12283.1;ACN10337.1;ACN09936.1;ACI69823.1;ACI69224.1;ACI68432.1;ACI66278.1;ACH70676.1	NP_001133089.1	142	168	yes	no	2;3	1.1328e-14	152.34	By MS/MS	By MS/MS	By MS/MS	By MS/MS	By MS/MS	By MS/MS	By MS/MS	By MS/MS
DELQDEINNQAAK	KRQAQQERDELQDEIN	EINNQAAKNALIAEEK	R	D	E	A	K	N	2	0	2	2	0	2	2	0	0	1	1	1	0	0	0	0	0	0	0	0	0	13	0	1486.69	ACN60211.1	ACN60211.1	262	274	yes	yes	2	2.4204e-20	228.7	By matching	By matching	By MS/MS	By matching	By matching	By matching	By matching	By matching
DELVPSTPISEQK	HVSIVEPKDELVPSTP	STPISEQKGAKPEAAV	K	D	E	Q	K	G	0	0	0	1	0	1	2	0	0	1	1	1	0	0	2	2	1	0	0	1	0	13	0	1441.73	ACN10438.1;ACI67277.1;ACH71009.1	ACN10438.1	215	227	yes	no	2	0.0081404	76.357	By matching	By MS/MS	By matching	By MS/MS	By matching	By MS/MS	By matching	By matching
DEPGHFVLPCAEEK	DVLHACCKDEPGHFVL	VLPCAEEKLTDAIDAT	K	D	E	E	K	L	1	0	0	1	1	0	3	1	1	0	1	1	0	1	2	0	0	0	0	1	0	14	0	1626.73	Q03156.1;NP_001117164.1;CAA43187.1	Q03156.1	462	475	yes	no	2;3	0.00026805	112.62	By MS/MS	By MS/MS	By MS/MS	By MS/MS	By MS/MS	By MS/MS	By MS/MS	By MS/MS
DEQGHFVLPCAEEK	DVLHACCKDEQGHFVL	VLPCAEEKLTDAIDAT	K	D	E	E	K	L	1	0	0	1	1	1	3	1	1	0	1	1	0	1	1	0	0	0	0	1	0	14	0	1657.74	P21848.1;NP_001117137.1;CAA36643.1	P21848.1	462	475	yes	no	2;3	0.00023038	115.56	By matching	By MS/MS	By matching	By matching	By MS/MS	By matching	By matching	By matching
DEQVPSTPISEQK	HVSIVEPKDEQVPSTP	STPISEQKGAKPEAAA	K	D	E	Q	K	G	0	0	0	1	0	2	2	0	0	1	0	1	0	0	2	2	1	0	0	1	0	13	0	1456.7	ACN12447.1;ACN10099.1;ACI67795.1	ACN12447.1	215	227	yes	no	2	2.471e-07	159.58	By MS/MS	By MS/MS	By MS/MS	By MS/MS	By MS/MS	By MS/MS	By MS/MS	By matching
DESHASIIR	EAHGTWERDESHASII	ESHASIIRRPDNTMGS	R	D	E	I	R	R	1	1	0	1	0	0	1	0	1	2	0	0	0	0	0	2	0	0	0	0	0	9	0	1026.51	ACI68415.1	ACI68415.1	122	130	yes	yes	2	0.00011419	164.46	By matching	By MS/MS	By MS/MS	By matching	By matching	By MS/MS	By matching	By matching
DESNTVDEAQAVK	VSLLTAGRDESNTVDE	VDEAQAVKDAKDIYEA	R	D	E	V	K	D	2	0	1	2	0	1	2	0	0	0	0	1	0	0	0	1	1	0	0	2	0	13	0	1404.64	ACI68517.1;ACI69495.1	ACI69495.1	163	175	no	no	2	1.7736e-15	217.2	By MS/MS	By MS/MS	By MS/MS	By MS/MS	By MS/MS	By MS/MS	By MS/MS	By MS/MS
DESSPYAAMLAAQDVAQR	GMKVKADRDESSPYAA	AAQDVAQRCKELGITA	R	D	E	Q	R	C	5	1	0	2	0	2	1	0	0	0	1	0	1	0	1	2	0	0	1	1	0	18	0	1921.88	NP_001134254.1;NP_001133208.1;ACN12165.1;ACN09818.1;ACI66811.1;ACH70996.1;ACH70995.1;ACN12313.1;ACN09966.1	NP_001134254.1	67	84	yes	no	2;3	6.4864e-21	218.66	By MS/MS	By MS/MS	By matching	By MS/MS	By MS/MS	By MS/MS	By MS/MS	By MS/MS
DETIPSTPVSEQK	HVSIVEPKDETIPSTP	STPVSEQKGAKPEAPA	K	D	E	Q	K	G	0	0	0	1	0	1	2	0	0	1	0	1	0	0	2	2	2	0	0	1	0	13	0	1429.69	ACI70043.1;ACH71008.1;ACI67536.1;ACN12239.1;ACN09892.1;ACI67079.1	ACI67079.1	215	227	no	no	2	2.1874e-07	161.48	By MS/MS	By MS/MS	By MS/MS	By MS/MS	By MS/MS	By MS/MS	By MS/MS	By MS/MS
DETNYGIPQR	IIMWKLTRDETNYGIP	TNYGIPQRALKGHSHF	R	D	E	Q	R	A	0	1	1	1	0	1	1	1	0	1	0	0	0	0	1	0	1	0	1	0	0	10	0	1191.55	ACN11311.1;ACN11018.1;ACI68732.1;ACI67449.1;ACH70647.1;ACN12499.1;ACN10148.1	ACN11311.1	48	57	yes	no	2	8.87e-05	152.54	By MS/MS	By MS/MS	By MS/MS	By MS/MS	By MS/MS	By MS/MS	By MS/MS	By MS/MS
DETVGESSPHIANIGR	SLTRQMEKDETVGESS	PHIANIGRLVEDMENK	K	D	E	G	R	L	1	1	1	1	0	0	2	2	1	2	0	0	0	0	1	2	1	0	0	1	0	16	0	1680.81	ACN10552.1;ACI33944.1;ACI68515.1;ACH70650.1	ACN10552.1	200	215	yes	no	3	0.04187	49.298	By matching	By matching	By matching	By matching	By matching	By matching	By matching	By matching
DEWGSGVEALESSLQLEK	QDVKKPEKDEWGSGVE	ESSLQLEKSVNQSLLD	K	D	E	E	K	S	1	0	0	1	0	1	4	2	0	0	3	1	0	0	0	3	0	1	0	1	0	18	0	1975.94	P49946.1;NP_001117129.1;ACN12764.1;ACI67950.1;ACI33630.1;ACH70935.1;ACH70934.1;AAB34575.1	P49946.1	88	105	yes	no	2	7.2877e-05	111.65	By matching	By matching	By MS/MS	By matching	By matching	By matching	By matching	By matching
DFCLLHPGDPMFLMFSGEIVK	IHPQLQDRDFCLLHPG	MFSGEIVKYEGVEVLH	R	D	F	V	K	Y	0	0	0	2	1	0	1	2	1	1	3	1	2	3	2	1	0	0	0	1	0	21	0	2452.16	ACM08542.1;NP_001133102.1;ACI69735.1;ACH70694.1;ACI69278.1	NP_001133102.1	250	270	no	no	3	1.3886e-08	136.39	By matching	By MS/MS	By matching	By matching	By matching	By MS/MS	By MS/MS	By MS/MS
DFELDVLEEAYTTEHWLVR	RNAEIGNKDFELDVLE	TTEHWLVRIYKVKDLD	K	D	F	V	R	I	1	1	0	2	0	0	4	0	1	0	3	0	0	1	0	0	2	1	1	2	0	19	0	2364.13	NP_001135197.1;ACI33169.1;ACN10714.1	NP_001135197.1	672	690	yes	no	2;3	6.8288e-08	132.08	By MS/MS	By MS/MS	By MS/MS	By MS/MS	By MS/MS	By MS/MS	By MS/MS	By MS/MS
DFFGENYIQNFK	AMVCKVGKDFFGENYI	ENYIQNFKDNGVSTEF	K	D	F	F	K	D	0	0	2	1	0	1	1	1	0	1	0	1	0	3	0	0	0	0	1	0	0	12	0	1520.69	NP_001134323.1;ACI67056.1	NP_001134323.1	68	79	yes	no	2	4.4179e-13	216.91	By MS/MS	By MS/MS	By matching	By matching	By MS/MS	By MS/MS	By MS/MS	By MS/MS
DFGSFQALK	ELAAAINRDFGSFQAL	FGSFQALKDKMSAATV	R	D	F	L	K	D	1	0	0	1	0	1	0	1	0	0	1	1	0	2	0	1	0	0	0	0	0	9	0	1011.5	ACN12619.1;ACN10263.1	ACN12619.1	128	136	yes	no	2	0.0014734	109.66	By MS/MS	By MS/MS	By MS/MS	By MS/MS	By matching	By MS/MS	By MS/MS	By MS/MS
DFLAGGISAAISK	ETVVSFAKDFLAGGIS	GISAAISKTAVAPIER	K	D	F	S	K	T	3	0	0	1	0	0	0	2	0	2	1	1	0	1	0	2	0	0	0	0	0	13	0	1248.67	ACI66474.1;ACN12672.1;ACN10312.1;ADM15907.1;ACI67091.1;ACN12449.1;ACN10101.1;ACI69327.1;ACI67623.1;ACH71014.1;ACN11489.1;ADM15966.1;ACI68775.1	ADM15907.1	11	23	no	no	2	8.5583e-15	205.87	By MS/MS	By MS/MS	By MS/MS	By MS/MS	By MS/MS	By MS/MS	By MS/MS	By MS/MS
DFLHLPPEIVPATLR	NEGIQYLRDFLHLPPE	EIVPATLRRQMRPETA	R	D	F	L	R	R	1	1	0	1	0	0	1	0	1	1	3	0	0	1	3	0	1	0	0	1	0	15	0	1716.96	ACI69812.1;ACI67887.1;ACI67159.1;ACI66094.1;ACH70846.1;ACN12403.1;ACN10056.1;ACI68412.1;ACI70128.1	ACI69812.1	81	95	yes	no	3	0.031324	54.951	By MS/MS	By matching	By matching	By matching	By matching	By MS/MS	By MS/MS	By matching
DFLLKPELLR	SIHSSGFRDFLLKPEL	LLKPELLRAIVDCGFE	R	D	F	L	R	A	0	1	0	1	0	0	1	0	0	0	4	1	0	1	1	0	0	0	0	0	0	10	1	1242.73	ACN58701.1;NP_001134851.1;NP_001133080.1;ACN12648.1;ACN10290.1;ACM09195.1;ACI69146.1;ACH70654.1;NP_001133398.1;ACI33160.1	ACN58701.1	43	52	yes	no	2	0.0040664	123.62	By MS/MS	By MS/MS	By matching	By MS/MS	By MS/MS	By MS/MS	By MS/MS	By MS/MS
DFMIQGGDFTR	SKFHRVIKDFMIQGGD	IQGGDFTRGDGTGGKS	K	D	F	T	R	G	0	1	0	2	0	1	0	2	0	1	0	0	1	2	0	0	1	0	0	0	0	11	0	1285.58	AGH92516.1;ACI69864.1;ACI67931.1;ACI69995.1;ACI68543.1;NP_001134342.1;ACI67125.1	AGH92516.1	99	109	yes	no	2	5.2189e-24	187.78	By MS/MS	By MS/MS	By MS/MS	By MS/MS	By MS/MS	By MS/MS	By MS/MS	By MS/MS
DFMMQQTMLR	KDGNPLTKDFMMQQTM	MMQQTMLRVKDPVKSL	K	D	F	L	R	V	0	1	0	1	0	2	0	0	0	0	1	0	3	1	0	0	1	0	0	0	0	10	0	1299.58	ACI66158.1;ACH70673.1	ACI66158.1	24	33	yes	no	2	2.9257e-05	167.09	By MS/MS	By MS/MS	By MS/MS	By MS/MS	By MS/MS	By MS/MS	By MS/MS	By MS/MS
DFNLFSSDGYAAK	YNKLVAVKDFNLFSSD	SSDGYAAKNLMFKDSA	K	D	F	A	K	N	2	0	1	2	0	0	0	1	0	0	1	1	0	2	0	2	0	0	1	0	0	13	0	1433.65	ACI33444.1;P80426.1;NP_001117127.1;AAA18838.1;P80429.1;AAN17024.1;AAN17019.1	ACI33444.1	280	292	yes	no	2	6.6169e-15	209.11	By MS/MS	By MS/MS	By MS/MS	By MS/MS	By MS/MS	By MS/MS	By MS/MS	By MS/MS
DFNQAFGFMSR	IYKEFIFKDFNQAFGF	QAFGFMSRVALQAEKM	K	D	F	S	R	V	1	1	1	1	0	1	0	1	0	0	0	0	1	3	0	1	0	0	0	0	0	11	0	1318.58	NP_001140026.1;ACM09621.1;ACM09301.1;ACM08306.1;ACM08550.1	NP_001140026.1	42	52	yes	no	2	2.1791e-11	210.93	By MS/MS	By MS/MS	By MS/MS	By MS/MS	By MS/MS	By MS/MS	By MS/MS	By MS/MS
DFNSYGSR	TSRGLNPRDFNSYGSR	DFNSYGSRRGNDAVMA	R	D	F	S	R	R	0	1	1	1	0	0	0	1	0	0	0	0	0	1	0	2	0	0	1	0	0	8	0	944.399	NP_001133702.1;ACI33729.1	NP_001133702.1	715	722	yes	no	2	0.020586	70.028	By matching	By matching	By matching	By matching	By matching	By matching	By matching	By MS/MS
DFPLSGFVEVR	FEGHPFRKDFPLSGFV	LSGFVEVRYDDEVKRV	K	D	F	V	R	Y	0	1	0	1	0	0	1	1	0	0	1	0	0	2	1	1	0	0	0	2	0	11	0	1264.65	ACI69869.1;ACI67788.1	ACI69869.1	194	204	yes	no	2	0.00028283	125.97	By MS/MS	By matching	By MS/MS	By MS/MS	By MS/MS	By MS/MS	By MS/MS	By matching
DFSSVFQFLR	CARGYAGKDFSSVFQF	SSVFQFLREDEDKEGQ	K	D	F	L	R	E	0	1	0	1	0	1	0	0	0	0	1	0	0	3	0	2	0	0	0	1	0	10	0	1244.62	ACI33919.1	ACI33919.1	315	324	yes	yes	2	2.2994e-09	198.25	By MS/MS	By MS/MS	By MS/MS	By MS/MS	By MS/MS	By MS/MS	By MS/MS	By MS/MS
DFTLTELQPYDGLQNPR	PLPKLKKRDFTLTELQ	YDGLQNPRILMAVNFK	R	D	F	P	R	I	0	1	1	2	0	2	1	1	0	0	3	0	0	1	2	0	2	0	1	0	0	17	0	2005.97	NP_001139831.1;ACM08229.1	NP_001139831.1	61	77	yes	no	2	1.5494e-48	265.56	By MS/MS	By MS/MS	By MS/MS	By MS/MS	By MS/MS	By MS/MS	By MS/MS	By MS/MS
DFTNSPLHR	LDDQGLTKDFTNSPLH	FTNSPLHRFKKPGSKN	K	D	F	H	R	F	0	1	1	1	0	0	0	0	1	0	1	0	0	1	1	1	1	0	0	0	0	9	0	1085.53	NP_001133504.1;ACI33363.1;ACN10491.1	NP_001133504.1	419	427	yes	no	2	0.0027258	93.649	By matching	By matching	By MS/MS	By matching	By matching	By matching	By matching	By matching
DFTPAAAQVAHQKPQPSITK	GVVTKGDKDFTPAAAQ	KPQPSITKMPQNQHLT	K	D	F	T	K	M	4	0	0	1	0	3	0	0	1	1	0	2	0	1	3	1	2	0	0	1	0	20	1	2134.12	NP_001135055.1;ACI70034.1	NP_001135055.1	71	90	yes	no	3	0.029541	44.391	By matching	By matching	By matching	By matching	By matching	By MS/MS	By matching	By matching
DFTPVCTTELACAAK	GILFSHPRDFTPVCTT	TELACAAKISNEFKKR	R	D	F	A	K	I	3	0	0	1	2	0	1	0	0	0	1	1	0	1	1	0	3	0	0	1	0	15	0	1682.76	ACI67571.1	ACI67571.1	41	55	yes	yes	2	2.4414e-33	246.64	By MS/MS	By MS/MS	By MS/MS	By MS/MS	By MS/MS	By MS/MS	By MS/MS	By MS/MS
DFVEAPSQMLENWVWEK	FSGTHVERDFVEAPSQ	LENWVWEKEPLQRMSK	R	D	F	E	K	E	1	0	1	1	0	1	3	0	0	0	1	1	1	1	1	1	0	2	0	2	0	17	0	2106.97	NP_001133368.1;ACI33100.1;ACN10833.1	NP_001133368.1	495	511	yes	no	2	2.3001e-37	252.76	By MS/MS	By MS/MS	By MS/MS	By MS/MS	By MS/MS	By MS/MS	By MS/MS	By MS/MS
DFVFVSQDPK	YKPKAYLRDFVFVSQD	VFVSQDPKDQLLLGPT	R	D	F	P	K	D	0	0	0	2	0	1	0	0	0	0	0	1	0	2	1	1	0	0	0	2	0	10	0	1180.58	ACN10637.1	ACN10637.1	339	348	yes	yes	2	0.00014977	147.91	By MS/MS	By MS/MS	By MS/MS	By MS/MS	By MS/MS	By MS/MS	By MS/MS	By MS/MS
DFVPDYVVETIADFIEAYEEEEG	DSDDPERKDFVPDYVV	EAYEEEEG________	K	D	F	E	G	-	2	0	0	3	0	0	6	1	0	2	0	0	0	2	1	0	1	0	2	3	0	23	0	2678.18	NP_001167117.1;ACN10870.1	NP_001167117.1	289	311	yes	no	2	0.036645	38.377	By matching	By matching	By matching	By matching	By matching	By matching	By matching	By matching
DGAGDVAFIK	AGAFQCLKDGAGDVAF	AGDVAFIKPLAVPAAE	K	D	G	I	K	P	2	0	0	2	0	0	0	2	0	1	0	1	0	1	0	0	0	0	0	1	0	10	0	991.497	ACI33444.1;P80426.1;NP_001117127.1;AAA18838.1;P80429.1;AAN17024.1;AAN17019.1;ACC55231.1	ACI33444.1	210	219	yes	no	2	0.069765	49.189	By MS/MS	By matching	By matching	By matching	By matching	By matching	By matching	By matching
DGAGDVAFIKPLAVPAAEK	AGAFQCLKDGAGDVAF	LAVPAAEKASYELLCK	K	D	G	E	K	A	5	0	0	2	0	0	1	2	0	1	1	2	0	1	2	0	0	0	0	2	0	19	1	1868	ACI33444.1;P80426.1;NP_001117127.1;AAA18838.1;P80429.1;AAN17024.1;AAN17019.1;ACC55231.1	ACI33444.1	210	228	yes	no	2;3	8.0296e-15	178.71	By MS/MS	By MS/MS	By MS/MS	By MS/MS	By MS/MS	By MS/MS	By MS/MS	By MS/MS
DGANVVIAAK	AIALKAAKDGANVVIA	ANVVIAAKTAQVHPKL	K	D	G	A	K	T	3	0	1	1	0	0	0	1	0	1	0	1	0	0	0	0	0	0	0	2	0	10	0	956.529	ACN12769.1;ACN10404.1;NP_001135155.1;ACH70700.1	ACN12769.1	33	42	no	no	2	3.5231e-06	160.77	By matching	By matching	By matching	By MS/MS	By MS/MS	By MS/MS	By MS/MS	By MS/MS
DGCVLSELINSLHK	LGFQDWLKDGCVLSEL	ELINSLHKDNKPIKKI	K	D	G	H	K	D	0	0	1	1	1	0	1	1	1	1	3	1	0	0	0	2	0	0	0	1	0	14	0	1583.8	ACM09025.1	ACM09025.1	58	71	no	no	2;3	0.00038865	107.74	By matching	By MS/MS	By matching	By MS/MS	By matching	By MS/MS	By matching	By matching
DGDFCLAESIAILK	IRKAPAIRDGDFCLAE	AESIAILKYLAEKYQT	R	D	G	L	K	Y	2	0	0	2	1	0	1	1	0	2	2	1	0	1	0	1	0	0	0	0	0	14	0	1550.77	ACI66391.1	ACI66391.1	59	72	yes	yes	2	2.4451e-08	166.62	By MS/MS	By MS/MS	By MS/MS	By MS/MS	By MS/MS	By MS/MS	By MS/MS	By MS/MS
DGDFILTESVAILK	VRKVPVMRDGDFILTE	TESVAILKYLAEKFGT	R	D	G	L	K	Y	1	0	0	2	0	0	1	1	0	2	2	1	0	1	0	1	1	0	0	1	0	14	0	1519.81	ACI66470.1;ACI69297.1;ACI67154.1;ACI33850.1;ACI67282.1;ACI67968.1;ACI69814.1	ACI66470.1	59	72	yes	no	2;3	4.2974e-33	247.67	By MS/MS	By MS/MS	By MS/MS	By MS/MS	By MS/MS	By MS/MS	By MS/MS	By MS/MS
DGDYTEIPVPEQFK	MNVLVPGKDGDYTEIP	IPVPEQFKTVWDGKKL	K	D	G	F	K	T	0	0	0	2	0	1	2	1	0	1	0	1	0	1	2	0	1	0	1	1	0	14	0	1636.76	NP_001133556.1;ACI33472.1	NP_001133556.1	437	450	yes	no	2	0.0007294	98.582	By MS/MS	By MS/MS	By MS/MS	By MS/MS	By MS/MS	By MS/MS	By MS/MS	By MS/MS
DGEDAGAYDGPR	YPTLKIFKDGEDAGAY	AGAYDGPRTADGIVSH	K	D	G	P	R	T	2	1	0	3	0	0	1	3	0	0	0	0	0	0	1	0	0	0	1	0	0	12	0	1221.49	ACI34304.1;NP_001161991.1;ACS28414.1	NP_001161991.1	97	108	no	no	2	0.0012402	90.697	By matching	By matching	By MS/MS	By matching	By matching	By matching	By matching	By matching
DGEDAGPYDGPR	YPTLKIFRDGEDAGPY	AGPYDGPRTADGIVSH	R	D	G	P	R	T	1	1	0	3	0	0	1	3	0	0	0	0	0	0	2	0	0	0	1	0	0	12	0	1247.51	ACN10701.1;ACI33158.1	ACN10701.1	97	108	yes	no	2	3.0424e-07	170.4	By matching	By matching	By MS/MS	By MS/MS	By matching	By matching	By matching	By matching
DGELPVEDDYDLSDVDLDDDIGKEEL	SVDAWDGKDGELPVED	DDIGKEEL________	K	D	G	E	L	-	0	0	0	9	0	0	4	2	0	1	4	1	0	0	1	1	0	0	1	2	0	26	1	2922.27	ACI34364.1;ACN60302.1	ACI34364.1	417	442	yes	no	2;3	2.4918e-19	174.7	By MS/MS	By MS/MS	By MS/MS	By MS/MS	By MS/MS	By MS/MS	By MS/MS	By MS/MS
DGELPVEDDYDLSDVDLDDNFGKDEL	SVEAWDGKDGELPVED	DNFGKDEL________	K	D	G	E	L	-	0	0	1	9	0	0	3	2	0	0	4	1	0	1	1	1	0	0	1	2	0	26	1	2941.25	ACN10934.1;ACI33422.1	ACN10934.1	418	443	yes	no	2	1.7826e-06	103.75	By matching	By matching	By matching	By matching	By matching	By matching	By matching	By matching
DGEMLTTDIDYLDVWK	DDELFPMRDGEMLTTD	IDYLDVWKGMEALQAS	R	D	G	W	K	G	0	0	0	4	0	0	1	1	0	1	2	1	1	0	0	0	2	1	1	1	0	16	0	1912.88	ACI67363.1	ACI67363.1	136	151	yes	yes	2	1.7202e-26	233.4	By MS/MS	By MS/MS	By MS/MS	By MS/MS	By MS/MS	By MS/MS	By MS/MS	By MS/MS
DGEVTVTNDGATILSMMDVDHQIAK	LDKMMVDRDGEVTVTN	DVDHQIAKLMVELSKS	R	D	G	A	K	L	2	0	1	4	0	1	1	2	1	2	1	1	2	0	0	1	3	0	0	3	0	25	0	2659.25	NP_001167310.1;ACN11333.1	NP_001167310.1	65	89	yes	no	3	3.1541e-06	96.55	By MS/MS	By MS/MS	By MS/MS	By MS/MS	By MS/MS	By MS/MS	By MS/MS	By MS/MS
DGFIDLMELK	FKQYDAGKDGFIDLME	FIDLMELKLMMEKLGA	K	D	G	L	K	L	0	0	0	2	0	0	1	1	0	1	2	1	1	1	0	0	0	0	0	0	0	10	0	1179.58	NP_001167374.1;ACN11503.1;NP_001139926.1;ACM08726.1	NP_001167374.1	105	114	yes	no	2	0.00048997	126.71	By MS/MS	By MS/MS	By matching	By matching	By MS/MS	By matching	By MS/MS	By MS/MS
DGFVDKEDLHDMLASLGK	FNMIDQNRDGFVDKED	DMLASLGKNPTDDYLE	R	D	G	G	K	N	1	0	0	4	0	0	1	2	1	0	3	2	1	1	0	1	0	0	0	1	0	18	1	1988.95	ADM15886.1;ACI68070.1;ACH70954.1;ACI67885.1;ACI66712.1;ACI66702.1;ACH70953.1;ACI69179.1;ACI66544.1	ADM15886.1	46	63	yes	no	3;4	9.7781e-07	145.79	By MS/MS	By MS/MS	By MS/MS	By MS/MS	By MS/MS	By MS/MS	By MS/MS	By MS/MS
DGINPEPVHEPATGR	GGCRVKPKDGINPEPV	VHEPATGRKLCDMFPC	K	D	G	G	R	K	1	1	1	1	0	0	2	2	1	1	0	0	0	0	3	0	1	0	0	1	0	15	0	1587.76	NP_001133574.1;ACN10881.1;ACI33507.1	NP_001133574.1	34	48	yes	no	2;3	2.5473e-10	167.92	By MS/MS	By MS/MS	By MS/MS	By MS/MS	By MS/MS	By MS/MS	By MS/MS	By MS/MS
DGKYDLDFK	VAASEFYKDGKYDLDF	GKYDLDFKSPDDPSRY	K	D	G	F	K	S	0	0	0	3	0	0	0	1	0	0	1	2	0	1	0	0	0	0	1	0	0	9	1	1099.52	ACN12602.1;ACN10247.1;NP_001133366.1;ACI33096.1;CBL79146.1	NP_001133366.1	254	262	no	no	2	0.0069804	126.39	By MS/MS	By MS/MS	By MS/MS	By MS/MS	By matching	By matching	By MS/MS	By MS/MS
DGLELEGQLTEEEIMIR	PKVQFNWRDGLELEGQ	TEEEIMIRDSFRDYCQ	R	D	G	I	R	D	0	1	0	1	0	1	5	2	0	2	3	0	1	0	0	0	1	0	0	0	0	17	0	1973.96	ACI33980.1	ACI33980.1	55	71	yes	yes	2	1.6303e-37	256.08	By MS/MS	By MS/MS	By MS/MS	By MS/MS	By MS/MS	By matching	By matching	By matching
DGLLPEQTYFVGFAR	PTLWWLFRDGLLPEQT	TYFVGFARSDLTVDAI	R	D	G	A	R	S	1	1	0	1	0	1	1	2	0	0	2	0	0	2	1	0	1	0	1	1	0	15	0	1711.86	NP_001135196.1;ACI33164.1	NP_001135196.1	62	76	yes	no	2	7.2797e-06	142.45	By MS/MS	By MS/MS	By matching	By MS/MS	By MS/MS	By MS/MS	By matching	By MS/MS
DGLLVTEMDLNLTR	SPGLSRTRDGLLVTEM	EMDLNLTRQISDKWSF	R	D	G	T	R	Q	0	1	1	2	0	0	1	1	0	0	4	0	1	0	0	0	2	0	0	1	0	14	0	1588.81	NP_001140121.1;ACM08325.1	NP_001140121.1	334	347	yes	no	2	1.2354e-86	316.65	By MS/MS	By MS/MS	By MS/MS	By MS/MS	By MS/MS	By MS/MS	By MS/MS	By MS/MS
DGLVLGADTR	TICGVVFKDGLVLGAD	LVLGADTRATEGMIVA	K	D	G	T	R	A	1	1	0	2	0	0	0	2	0	0	2	0	0	0	0	0	1	0	0	1	0	10	0	1015.53	ACI68005.1;ACI67557.1;ACI67792.1	ACI68005.1	53	62	yes	no	2	0.021889	65.695	By MS/MS	By matching	By MS/MS	By matching	By matching	By matching	By matching	By matching
DGNANGVTLLEALDSILPPSRPTDK	KGWKVERKDGNANGVT	PPSRPTDKPLRLPLQD	K	D	G	D	K	P	2	1	2	3	0	0	1	2	0	1	4	1	0	0	3	2	2	0	0	1	0	25	1	2592.34	NP_001117101.1;ACN12790.1;ACN10846.1;ACN10424.1;ACH70682.1;AAG38613.1;ACN11081.1	ACN11081.1	220	244	no	no	3	0.062735	27.928	By matching	By matching	By matching	By MS/MS	By matching	By MS/MS	By matching	By matching
DGNANGVTLLEALDSILPPSRPTDKPLR	KGWKVERKDGNANGVT	RPTDKPLRLPLQDVYK	K	D	G	L	R	L	2	2	2	3	0	0	1	2	0	1	5	1	0	0	4	2	2	0	0	1	0	28	2	2958.58	NP_001117101.1;ACN12790.1;ACN10846.1;ACN10424.1;ACH70682.1;AAG38613.1;ACN11081.1	ACN11081.1	220	247	no	no	3;4	1.2007e-05	86.08	By MS/MS	By MS/MS	By matching	By MS/MS	By MS/MS	By MS/MS	By MS/MS	By MS/MS
DGPMCMFDNQAGAPNYFPNSFSAPETQPQHVETR	TRVANYQRDGPMCMFD	QPQHVETRFKVSPDVG	R	D	G	T	R	F	3	1	3	2	1	3	2	2	1	0	0	0	2	3	5	2	2	0	1	1	0	34	0	3839.64	NP_001133774.1;ACI33877.1	NP_001133774.1	325	358	yes	no	3	1.4002e-19	148.3	By MS/MS	By matching	By MS/MS	By MS/MS	By MS/MS	By MS/MS	By MS/MS	By matching
DGPMCMFNNQAGAPNYFPNSFSAPETQR	TRVSNYQRDGPMCMFN	FSAPETQRQHVETRFK	R	D	G	Q	R	Q	3	1	4	1	1	2	1	2	0	0	0	0	2	3	4	2	1	0	1	0	0	28	0	3147.33	ACN11170.1	ACN11170.1	389	416	yes	yes	3	6.6099e-20	166.6	By MS/MS	By MS/MS	By MS/MS	By MS/MS	By MS/MS	By MS/MS	By MS/MS	By MS/MS
DGQALFNYLAEK	TKQMQSTRDGQALFNY	LFNYLAEKHSFRQEYL	R	D	G	E	K	H	2	0	1	1	0	1	1	1	0	0	2	1	0	1	0	0	0	0	1	0	0	12	0	1367.67	NP_001135167.1;B5DGH9.1;ACH70853.1	NP_001135167.1	110	121	yes	no	2	5.5276e-05	129.76	By matching	By matching	By matching	By matching	By MS/MS	By MS/MS	By matching	By matching
DGQAMLWDLNEGK	SLCASGGKDGQAMLWD	LWDLNEGKHLYTLDSG	K	D	G	G	K	H	1	0	1	2	0	1	1	2	0	0	2	1	1	0	0	0	0	1	0	0	0	13	0	1475.67	ACN11311.1;ACN11018.1;ACI68732.1;ACI67449.1;ACH70647.1;ACN12499.1;ACN10148.1	ACN11311.1	213	225	yes	no	2	4.0524e-47	286.53	By MS/MS	By MS/MS	By MS/MS	By MS/MS	By MS/MS	By MS/MS	By MS/MS	By MS/MS
DGQPLNMILDDGGDLTNMVHK	IEQTIYWKDGQPLNMI	DLTNMVHKKYPKLLSG	K	D	G	H	K	K	0	0	2	4	0	1	0	3	1	1	3	1	2	0	1	0	1	0	0	1	0	21	0	2282.07	NP_001135793.1;NP_001133847.1;ACN10496.1;ACI34009.1;ACH70814.1	NP_001135793.1	122	142	yes	no	2;3	1.9824e-66	291.99	By MS/MS	By MS/MS	By MS/MS	By MS/MS	By MS/MS	By MS/MS	By MS/MS	By MS/MS
DGQVIGIGAGQQSR	SNSVCYAKDGQVIGIG	IGAGQQSRIHCTRLAG	K	D	G	S	R	I	1	1	0	1	0	3	0	4	0	2	0	0	0	0	0	1	0	0	0	1	0	14	0	1384.71	NP_001133622.1;ACI33591.1;ACN10681.1	NP_001133622.1	437	450	no	no	2	2.1119e-08	167.92	By MS/MS	By MS/MS	By MS/MS	By MS/MS	By MS/MS	By MS/MS	By MS/MS	By MS/MS
DGSFECIQAIK	AEFSCVRKDGSFECIQ	FECIQAIKGGEADAIT	K	D	G	I	K	G	1	0	0	1	1	1	1	1	0	2	0	1	0	1	0	1	0	0	0	0	0	11	0	1266.59	ACI33444.1;P80426.1;NP_001117127.1;AAA18838.1;P80429.1;ABH07963.1;AAC42221.1;AAN17022.1;AAN17017.1	ACI33444.1	54	64	yes	no	2	7.1253e-05	143.24	By MS/MS	By MS/MS	By MS/MS	By MS/MS	By MS/MS	By MS/MS	By MS/MS	By MS/MS
DGSGTVTPGNASGINDGVAATVLMSQSEAQK	KLRPCFLKDGSGTVTP	MSQSEAQKRGLKPMAR	K	D	G	Q	K	R	4	0	2	2	0	2	1	5	0	1	1	1	1	0	1	4	3	0	0	3	0	31	0	2961.4	NP_001133421.1;ACI33207.1	NP_001133421.1	239	269	yes	no	3	3.6648e-24	168.79	By MS/MS	By MS/MS	By MS/MS	By MS/MS	By MS/MS	By MS/MS	By MS/MS	By MS/MS
DGTGFLQCVLNDK	NLLFIVLRDGTGFLQC	LQCVLNDKLCQCYNAL	R	D	G	D	K	L	0	0	1	2	1	1	0	2	0	0	2	1	0	1	0	0	1	0	0	1	0	13	0	1465.69	NP_001133698.1;ACI33721.1	NP_001133698.1	162	174	yes	no	2	0.0012203	88.224	By MS/MS	By matching	By matching	By matching	By matching	By matching	By matching	By matching
DGTGVVEFVR	VCYADVFRDGTGVVEF	TGVVEFVRKEDMTYAV	R	D	G	V	R	K	0	1	0	1	0	0	1	2	0	0	0	0	0	1	0	0	1	0	0	3	0	10	0	1077.55	NP_001167114.1;ACN10862.1	NP_001167114.1	155	164	yes	no	2	0.030141	90.913	By matching	By matching	By matching	By matching	By matching	By matching	By MS/MS	By matching
DGVFLYFEDNAGVIVNVK	QRKSYRRKDGVFLYFE	AGVIVNVKGEMKGSAI	K	D	G	V	K	G	1	0	2	2	0	0	1	2	0	1	1	1	0	2	0	0	0	0	1	4	0	18	0	1998.01	ACN12393.1;ACN10046.1;NP_001134137.1;ACI66338.1	ACN12393.1	92	109	yes	no	2	0.0069377	82.755	By matching	By matching	By MS/MS	By MS/MS	By MS/MS	By MS/MS	By matching	By MS/MS
DGVGFLINLIDSPGHVDFSSEVTAALR	MAFIKQCKDGVGFLIN	SEVTAALRVTDGALVV	K	D	G	L	R	V	2	1	1	3	0	0	1	3	1	2	3	0	0	2	1	3	1	0	0	3	0	27	0	2828.43	ACN11358.1;NP_001133466.1;ACI33293.1	NP_001133466.1	94	120	no	no	3	0.00051054	63.979	By MS/MS	By matching	By MS/MS	By MS/MS	By MS/MS	By matching	By matching	By MS/MS
DGVIEASINHEK	FIVAKAIRDGVIEASI	EASINHEKGYVQSKET	R	D	G	E	K	G	1	0	1	1	0	0	2	1	1	2	0	1	0	0	0	1	0	0	0	1	0	12	0	1310.65	NP_001133516.1;ACN10780.1;ACI33390.1;ACH70973.1;NP_001133204.1;ACH70974.1	NP_001133516.1	424	435	yes	no	2	2.2874e-05	142.76	By MS/MS	By MS/MS	By MS/MS	By MS/MS	By matching	By MS/MS	By matching	By matching
DGVVECAYVR	VLDAMNGKDGVVECAY	VVECAYVRSEETECKY	K	D	G	V	R	S	1	1	0	1	1	0	1	1	0	0	0	0	0	0	0	0	0	0	1	3	0	10	0	1166.54	ACH70948.1;NP_001135174.1;ACI66104.1;ACI67899.1;ACI68220.1	ACH70948.1	270	279	yes	no	2	0.00080167	113.93	By MS/MS	By matching	By matching	By MS/MS	By matching	By MS/MS	By MS/MS	By matching
DGVVLFK	FSKFEVSKDGVVLFKK	KDGVVLFKKFDEGRNT	K	D	G	F	K	K	0	0	0	1	0	0	0	1	0	0	1	1	0	1	0	0	0	0	0	2	0	7	0	776.443	ACN60216.1	ACN60216.1	114	120	yes	yes	1	0.053046	75.311	By MS/MS	By matching	By matching	By matching	By matching	By MS/MS	By matching	By matching
DGYVDYSASKPK	DSTPSDWKDGYVDYSA	DYSASKPKAEETGNGD	K	D	G	P	K	A	1	0	0	2	0	0	0	1	0	0	0	2	0	0	1	2	0	0	2	1	0	12	1	1328.62	NP_001133521.1;ACI33401.1	NP_001133521.1	412	423	yes	no	2	0.0090269	90.434	By matching	By matching	By matching	By matching	By MS/MS	By matching	By matching	By matching
DHAIVVGIYRPAPK	LTLEPYERDHAIVVGI	GIYRPAPKNKK_____	R	D	H	P	K	N	2	1	0	1	0	0	0	1	1	2	0	1	0	0	2	0	0	0	1	2	0	14	1	1534.86	NP_001133674.1;ACI33681.1	NP_001133674.1	305	318	yes	no	3	3.3329e-12	178.95	By MS/MS	By MS/MS	By MS/MS	By MS/MS	By MS/MS	By MS/MS	By MS/MS	By MS/MS
DHASIQINIAEVDK	SNRIIGAKDHASIQIN	INIAEVDKATGRFNGQ	K	D	H	D	K	A	2	0	1	2	0	1	1	0	1	3	0	1	0	0	0	1	0	0	0	1	0	14	0	1551.79	ACI69923.1;ACI66260.1;ACN12287.1;ACN09940.1;ACI70061.1;ACI67271.1;ACN12714.1;ACN10354.1	ACI69923.1	28	41	yes	no	2;3	2.4052e-33	254.94	By MS/MS	By MS/MS	By MS/MS	By MS/MS	By MS/MS	By MS/MS	By MS/MS	By MS/MS
DHIDTVMEYLINVTTAPEFRPWEVSDLTSR	IYSVDCLRDHIDTVME	EVSDLTSRVKMDKALA	R	D	H	S	R	V	1	2	1	3	0	0	3	0	1	2	2	0	1	1	2	2	4	1	1	3	0	30	1	3533.71	ACN12439.1;ACN10092.1;ACH70840.1	ACN12439.1	127	156	no	no	3;4	2.8206e-08	103.71	By matching	By MS/MS	By matching	By matching	By matching	By MS/MS	By matching	By matching
DHLLPLLR	QGLSEEERDHLLPLLR	DHLLPLLRNAQWVEVV	R	D	H	L	R	N	0	1	0	1	0	0	0	0	1	0	4	0	0	0	1	0	0	0	0	0	0	8	0	975.587	NP_001140026.1;ACM09621.1;ACM09301.1;ACM08306.1;ACM08550.1	NP_001140026.1	14	21	yes	no	2	0.00078579	123.69	By MS/MS	By MS/MS	By MS/MS	By MS/MS	By MS/MS	By MS/MS	By MS/MS	By MS/MS
DHQPCIIFMDEIDAIGGR	REMFNYARDHQPCIIF	EIDAIGGRRFSEGTSA	R	D	H	G	R	R	1	1	0	3	1	1	1	2	1	4	0	0	1	1	1	0	0	0	0	0	0	18	0	2085.96	ACH85257.1;NP_001134354.1;ACI67191.1	ACH85257.1	222	239	yes	no	3	0.0011114	85.176	By matching	By matching	By matching	By MS/MS	By matching	By matching	By matching	By MS/MS
DIAAASMRPEK	NTSALPIKDIAAASMR	AASMRPEKVIGMHYFS	K	D	I	E	K	V	3	1	0	1	0	0	1	0	0	1	0	1	1	0	1	1	0	0	0	0	0	11	1	1187.6	ACN58629.1	ACN58629.1	478	488	yes	yes	2	0.00087049	134.38	By MS/MS	By MS/MS	By MS/MS	By MS/MS	By matching	By MS/MS	By MS/MS	By matching
DIADEYGGVMVSFPR	ARRGQVLRDIADEYGG	GVMVSFPRSGANSDKV	R	D	I	P	R	S	1	1	0	2	0	0	1	2	0	1	0	0	1	1	1	1	0	0	1	2	0	15	0	1654.77	NP_001167124.1;ACN10888.1	NP_001167124.1	822	836	yes	no	2	4.1445e-06	147.51	By MS/MS	By MS/MS	By MS/MS	By MS/MS	By MS/MS	By MS/MS	By MS/MS	By MS/MS
DICNDVLELLNK	EKVEGELRDICNDVLE	DVLELLNKYLIENSTN	R	D	I	N	K	Y	0	0	2	2	1	0	1	0	0	1	3	1	0	0	0	0	0	0	0	1	0	12	0	1444.72	NP_001135087.1;ACN10949.1;ACI70157.1;ACI69428.1;ACI68864.1;ACI69139.1	NP_001135087.1	92	103	yes	no	2	5.7486e-09	182.25	By MS/MS	By MS/MS	By MS/MS	By MS/MS	By MS/MS	By MS/MS	By MS/MS	By MS/MS
DICNDVLGLLSK	NKVETELRDICNDVLG	DVLGLLSKYLIENAPN	R	D	I	S	K	Y	0	0	1	2	1	0	0	1	0	1	3	1	0	0	0	1	0	0	0	1	0	12	0	1345.69	NP_001134815.1;ACN12493.1;ACN10142.1;ACI69013.1	NP_001134815.1	92	103	yes	no	2	7.1234e-07	135.91	By MS/MS	By matching	By matching	By MS/MS	By matching	By matching	By MS/MS	By matching
DIDKAHYISSGLR	LAAAVFTKDIDKAHYI	HYISSGLRAGTVWINC	K	D	I	L	R	A	1	1	0	2	0	0	0	1	1	2	1	1	0	0	0	2	0	0	1	0	0	13	1	1473.76	ACI33614.1	ACI33614.1	453	465	yes	yes	3	0.070804	54.343	By matching	By matching	By MS/MS	By matching	By matching	By matching	By matching	By matching
DIDQILDELK	YYEDLSPKDIDQILDE	DQILDELKAGKVPPPG	K	D	I	L	K	A	0	0	0	3	0	1	1	0	0	2	2	1	0	0	0	0	0	0	0	0	0	10	0	1200.62	ACI67028.1	ACI67028.1	195	204	yes	yes	2	0.0014964	103.44	By MS/MS	By matching	By matching	By matching	By matching	By matching	By matching	By MS/MS
DIEDLFFK	LPMDVQERDIEDLFFK	DIEDLFFKYGKIRDIE	R	D	I	F	K	Y	0	0	0	2	0	0	1	0	0	1	1	1	0	2	0	0	0	0	0	0	0	8	0	1025.51	NP_001133886.1;ACN11334.1;ACI34079.1	NP_001133886.1	19	26	yes	no	2	0.00062405	128.61	By MS/MS	By MS/MS	By matching	By matching	By MS/MS	By matching	By MS/MS	By matching
DIEIIHEELR	EGNVDPVRDIEIIHEE	EIIHEELRLKDEESLG	R	D	I	L	R	L	0	1	0	1	0	0	3	0	1	3	1	0	0	0	0	0	0	0	0	0	0	10	0	1265.66	NP_001158828.1;ACN10563.1	NP_001158828.1	143	152	yes	no	2	0.0002293	141.88	By MS/MS	By MS/MS	By matching	By matching	By MS/MS	By matching	By matching	By matching
DIELVMSQANVSR	DETGVEVKDIELVMSQ	MSQANVSRAKAVRALK	K	D	I	S	R	A	1	1	1	1	0	1	1	0	0	1	1	0	1	0	0	2	0	0	0	2	0	13	0	1460.73	AGH92567.1;ACN12668.1;ACN12258.1;ACN10308.1;ACN09911.1;ACI69288.1;ACI69238.1;ACI68299.1;ACI67733.1;ACI66230.1;ACI66189.1;ACI66022.1;ACH85307.1;ACI68845.1;ACI68638.1;ACI66250.1;ACI69820.1;ACI69346.1;ACI67588.1;ACN11122.1;ACI66074.1	AGH92567.1	175	187	yes	no	2	0.00016911	115.83	By matching	By matching	By MS/MS	By matching	By MS/MS	By matching	By matching	By matching
DIFAYFSGDK	AVSERKGKDIFAYFSG	FAYFSGDKDAQGMSWC	K	D	I	D	K	D	1	0	0	2	0	0	0	1	0	1	0	1	0	2	0	1	0	0	1	0	0	10	0	1161.53	NP_001134971.1;ACI69684.1;ACI69244.1;ACI67984.1;ACI67762.1;ACI67575.1;ACI66683.1;ACI66088.1	NP_001134971.1	26	35	yes	no	2	0.00038315	131.09	By matching	By matching	By matching	By matching	By matching	By MS/MS	By MS/MS	By MS/MS
DIIATVQAK	GMANKQVKDIIATVQA	IIATVQAKVPGLKRVK	K	D	I	A	K	V	2	0	0	1	0	1	0	0	0	2	0	1	0	0	0	0	1	0	0	1	0	9	0	957.549	ACH70819.1;NP_001117191.1;DAA05186.1;DAA05185.1	ACH70819.1	176	184	yes	no	2	0.077429	46.406	By matching	By matching	By matching	By matching	By matching	By matching	By matching	By matching
DIIHDPGR	GYIKGIVKDIIHDPGR	DIIHDPGRGAPLAKVA	K	D	I	G	R	G	0	1	0	2	0	0	0	1	1	2	0	0	0	0	1	0	0	0	0	0	0	8	0	921.467	ACI70186.1;ACI68574.1;ACN12701.1;ACN12214.1;ACN10341.1;ACN09867.1;ACI69963.1;ACH70991.1;ACH70990.1;ACI67398.1;ACH70633.1;NP_001134948.1;ACI69609.1	ACI70186.1	47	54	yes	no	2	0.0024258	101.72	By MS/MS	By MS/MS	By MS/MS	By MS/MS	By MS/MS	By MS/MS	By MS/MS	By MS/MS
DIILQYLER	FVPPEEIRDIILQYLE	IILQYLERKKVQPHAL	R	D	I	E	R	K	0	1	0	1	0	1	1	0	0	2	2	0	0	0	0	0	0	0	1	0	0	9	0	1161.64	ACI70132.1;ACI69997.1;ACI69849.1	ACI70132.1	28	36	yes	no	2	0.00071237	135.55	By MS/MS	By matching	By MS/MS	By MS/MS	By MS/MS	By MS/MS	By MS/MS	By MS/MS
DIITGDELFTEVYK	________________	ELFTEVYKITEVCDGM	K	D	I	Y	K	I	0	0	0	2	0	0	2	1	0	2	1	1	0	1	0	0	2	0	1	1	0	14	0	1641.81	AGH92632.1;ADM16179.1;ACM08327.1;ACI68686.1;ACI68306.1;ACI67791.1;ACI69381.1;ADM15989.1;ACI67204.1	AGH92632.1	6	19	yes	no	2	1.3898e-53	292.8	By MS/MS	By MS/MS	By MS/MS	By MS/MS	By MS/MS	By MS/MS	By MS/MS	By MS/MS
DILAYNNEESGCAFPFPIIADNQR	EDHHGWTKDILAYNNE	PIIADNQRELAVALGM	K	D	I	Q	R	E	3	1	3	2	1	1	2	1	0	3	1	0	0	2	2	1	0	0	1	0	0	24	0	2753.28	ACI68294.1;ACI67008.1	ACI68294.1	84	107	yes	no	3	0.075711	15.063	By matching	By matching	By matching	By matching	By matching	By matching	By MS/MS	By matching
DILGSVGIEADDQR	SPSSQNIKDILGSVGI	GIEADDQRLAKVISEL	K	D	I	Q	R	L	1	1	0	3	0	1	1	2	0	2	1	0	0	0	0	1	0	0	0	1	0	14	0	1486.73	ACM08419.1;ACM08634.1	ACM08419.1	25	38	yes	no	2	3.2166e-08	163.62	By matching	By matching	By matching	By matching	By MS/MS	By MS/MS	By MS/MS	By matching
DILIQYDR	ESSKKEIKDILIQYDR	DILIQYDRTLLVADPR	K	D	I	D	R	T	0	1	0	2	0	1	0	0	0	2	1	0	0	0	0	0	0	0	1	0	0	8	0	1034.54	NP_001134097.1;ACN12420.1;ACN11417.1;ACN10073.1;ACM08397.1;ACH70747.1;ACM09220.1;ACM08724.1;ACI66218.1	NP_001134097.1	110	117	yes	no	2	0.0011832	111.61	By MS/MS	By MS/MS	By matching	By MS/MS	By MS/MS	By MS/MS	By matching	By matching
DILLRDELEEVLK	IFANQTEKDILLRDEL	DELEEVLKSHSDQLNL	K	D	I	L	K	S	0	1	0	2	0	0	3	0	0	1	4	1	0	0	0	0	0	0	0	1	0	13	1	1583.88	ACM08211.1	ACM08211.1	218	230	yes	yes	2;3	4.4171e-10	189.99	By MS/MS	By MS/MS	By MS/MS	By MS/MS	By MS/MS	By MS/MS	By MS/MS	By MS/MS
DILLRPELEEIAANHPTR	LFANQTEKDILLRPEL	IAANHPTRFKLWFTLD	K	D	I	T	R	F	2	2	1	1	0	0	3	0	1	2	3	0	0	0	2	0	1	0	0	0	0	18	1	2086.12	ACI69228.1;ACI33240.1	ACI69228.1	213	230	yes	no	3	0.049731	53.519	By matching	By matching	By matching	By matching	By matching	By matching	By MS/MS	By matching
DINDLTQSIYIPR	DGIQRPLKDINDLTQS	TQSIYIPRGVNIGALN	K	D	I	P	R	G	0	1	1	2	0	1	0	0	0	3	1	0	0	0	1	1	1	0	1	0	0	13	0	1546.8	ACN10840.1;ACI33042.1	ACN10840.1	108	120	yes	no	2	0.012288	69.314	By matching	By matching	By matching	By matching	By MS/MS	By matching	By matching	By matching
DINEVLNAGMSK	VISELVGKDINEVLNA	VLNAGMSKLASVPVGD	K	D	I	S	K	L	1	0	2	1	0	0	1	1	0	1	1	1	1	0	0	1	0	0	0	1	0	12	0	1289.63	ACM08419.1;ACM08634.1	ACM08419.1	50	61	yes	no	2	1.9202e-07	172.58	By MS/MS	By MS/MS	By MS/MS	By matching	By MS/MS	By matching	By MS/MS	By MS/MS
DINEVLNAGMSKLASVPVGDAVAVSAAGGSAAVAPGSAPASEEK	VISELVGKDINEVLNA	SAPASEEKKKEEEKKE	K	D	I	E	K	K	11	0	2	2	0	0	3	5	0	1	2	2	1	0	3	6	0	0	0	6	0	44	1	4064.04	ACM08419.1	ACM08419.1	50	93	yes	yes	4	0.067425	7.5003	By matching	By matching	By matching	By matching	By matching	By MS/MS	By matching	By matching
DINEVMNSGLSK	VVSELNGKDINEVMNS	VMNSGLSKLASVPAGG	K	D	I	S	K	L	0	0	2	1	0	0	1	1	0	1	1	1	1	0	0	2	0	0	0	1	0	12	0	1305.62	NP_001133207.1;ACN12206.1;ACN09859.1;ACH70993.1;ACM09788.1;ACM09422.1;ACM08361.1;ACM09537.1;ACM08252.1;ADM16145.1;ACM09317.1;ACM08936.1;ACI69468.2;ACH70994.1;ACM08451.1	NP_001133207.1	50	61	yes	no	2	6.2095e-25	203.74	By MS/MS	By MS/MS	By MS/MS	By MS/MS	By MS/MS	By MS/MS	By MS/MS	By MS/MS
DINQFGEGDQAK	PLEERKYKDINQFGEG	FGEGDQAKVCVDIMHK	K	D	I	A	K	V	1	0	1	2	0	2	1	2	0	1	0	1	0	1	0	0	0	0	0	0	0	12	0	1320.59	NP_001167124.1;ACN10888.1	NP_001167124.1	89	100	yes	no	2	0.00013015	115.12	By matching	By matching	By MS/MS	By matching	By matching	By matching	By matching	By matching
DIPGLTDSTVPR	VIIKKGEKDIPGLTDS	LTDSTVPRRLGPKRAS	K	D	I	P	R	R	0	1	0	2	0	0	0	1	0	1	1	0	0	0	2	1	2	0	0	1	0	12	0	1269.66	ACN12337.1;ACN09990.1;ACI69455.1;ACI66523.1;ACH71013.1;ACH71012.1	ACN12337.1	120	131	yes	no	2	0.02002	76.073	By matching	By MS/MS	By MS/MS	By MS/MS	By MS/MS	By MS/MS	By matching	By MS/MS
DIQLSDYIGK	AVVDGQFKDIQLSDYI	QLSDYIGKYVVFFFYP	K	D	I	G	K	Y	0	0	0	2	0	1	0	1	0	2	1	1	0	0	0	1	0	0	1	0	0	10	0	1150.59	NP_001134295.1;ACI66947.1	NP_001134295.1	27	36	yes	no	2	0.0021471	96.229	By MS/MS	By matching	By matching	By matching	By matching	By matching	By matching	By matching
DIQNTQCLLNVEHSGVTCPHVTLQFADSK	DVVDSLVRDIQNTQCL	TLQFADSKDDVGLSLV	R	D	I	S	K	D	1	0	2	2	2	3	1	1	2	1	3	1	0	1	1	2	3	0	0	3	0	29	0	3310.57	ACN60284.1	ACN60284.1	762	790	yes	yes	4	0.05195	28.36	By matching	By matching	By matching	By matching	By matching	By MS/MS	By MS/MS	By matching
DIQTNVYIR	ELERLTAKDIQTNVYI	IQTNVYIRHPVSLEQY	K	D	I	I	R	H	0	1	1	1	0	1	0	0	0	2	0	0	0	0	0	0	1	0	1	1	0	9	0	1120.59	NP_001134503.1;ACN12748.1;ACN10386.1;ACI67782.1	NP_001134503.1	136	144	yes	no	2	0.012186	76.282	By matching	By matching	By matching	By matching	By matching	By matching	By matching	By MS/MS
DISFQVEDLEFLIK	MKHGDGVKDISFQVED	EDLEFLIKKAKERGAV	K	D	I	I	K	K	0	0	0	2	0	1	2	0	0	2	2	1	0	2	0	1	0	0	0	1	0	14	0	1694.88	NP_001133898.1;ACI34103.1	NP_001133898.1	95	108	yes	no	2;3	4.8225e-54	302.85	By MS/MS	By MS/MS	By MS/MS	By MS/MS	By MS/MS	By MS/MS	By MS/MS	By MS/MS
DISMSDYR	VMPDGQFKDISMSDYR	DISMSDYRGKYVVFFF	K	D	I	Y	R	G	0	1	0	2	0	0	0	0	0	1	0	0	1	0	0	2	0	0	1	0	0	8	0	985.418	ACI67145.1;ACI68683.1;NP_001134858.1;ACI69176.1;ACI67901.1	ACI67145.1	28	35	yes	no	2	0.00090205	120.15	By MS/MS	By matching	By matching	By MS/MS	By MS/MS	By matching	By MS/MS	By MS/MS
DITEASVFDSYVLPK	IVEAAAVRDITEASVF	FDSYVLPKLYVKLHYC	R	D	I	P	K	L	1	0	0	2	0	0	1	0	0	1	1	1	0	1	1	2	1	0	1	2	0	15	0	1682.84	AGH92595.1;ACN12434.1;ACN10087.1	AGH92595.1	52	66	yes	no	2	6.2489e-13	192.65	By MS/MS	By MS/MS	By MS/MS	By MS/MS	By MS/MS	By MS/MS	By MS/MS	By MS/MS
DITFQGYFIK	AIPHTTSRDITFQGYF	TFQGYFIKKGTSVIPL	R	D	I	I	K	K	0	0	0	1	0	1	0	1	0	2	0	1	0	2	0	0	1	0	1	0	0	10	0	1230.63	ACH70691.1	ACH70691.1	385	394	yes	yes	2	5.6913e-05	157.78	By MS/MS	By MS/MS	By MS/MS	By MS/MS	By MS/MS	By MS/MS	By MS/MS	By MS/MS
DITLATFVDQASVL	DCGGLSQRDITLATFV	FVDQASVL________	R	D	I	V	L	-	2	0	0	2	0	1	0	0	0	1	2	0	0	1	0	1	2	0	0	2	0	14	0	1491.78	NP_001140026.1;ACM09621.1;ACM09301.1;ACM08306.1;ACM08550.1	NP_001140026.1	89	102	yes	no	2	1.512e-12	190.27	By MS/MS	By MS/MS	By MS/MS	By MS/MS	By MS/MS	By MS/MS	By MS/MS	By MS/MS
DITQPASLSEAAMK	LRIWSQDKDITQPASL	SLSEAAMKAGLSASEV	K	D	I	M	K	A	3	0	0	1	0	1	1	0	0	1	1	1	1	0	1	2	1	0	0	0	0	14	0	1460.72	NP_001135162.1;ACH70777.1	NP_001135162.1	134	147	yes	no	2	2.7533e-12	183.81	By MS/MS	By matching	By matching	By matching	By MS/MS	By matching	By matching	By matching
DITYFTQQLLR	KHIPIAGRDITYFTQQ	YFTQQLLREREVGIPP	R	D	I	L	R	E	0	1	0	1	0	2	0	0	0	1	2	0	0	1	0	0	2	0	1	0	0	11	0	1396.74	ACN11364.1	ACN11364.1	199	209	yes	yes	2	6.8249e-23	243.91	By MS/MS	By MS/MS	By MS/MS	By MS/MS	By MS/MS	By MS/MS	By MS/MS	By MS/MS
DIVCQIAYAK	MIVRFSNRDIVCQIAY	VCQIAYAKIEGDMIVC	R	D	I	A	K	I	2	0	0	1	1	1	0	0	0	2	0	1	0	0	0	0	0	0	1	1	0	10	0	1179.6	ACI67410.1;ACH70844.1;ACN12677.1;ACN10317.1;ACI66198.1	ACI67410.1	59	68	yes	no	2	0.0001365	148.91	By MS/MS	By MS/MS	By MS/MS	By MS/MS	By MS/MS	By MS/MS	By MS/MS	By MS/MS
DIVDTNGAGDAFVGGFLSELVQDK	PVLKIDQKDIVDTNGA	LSELVQDKELEQCVKA	K	D	I	D	K	E	2	0	1	4	0	1	1	4	0	1	2	1	0	2	0	1	1	0	0	3	0	24	0	2466.19	NP_001135164.1;ACH70824.1	NP_001135164.1	330	353	yes	no	2;3	1.957e-15	160.83	By MS/MS	By MS/MS	By MS/MS	By MS/MS	By MS/MS	By MS/MS	By MS/MS	By MS/MS
DIVHSGLAYTMER	RVAGASEKDIVHSGLA	GLAYTMERSDRQIMRT	K	D	I	E	R	S	1	1	0	1	0	0	1	1	1	1	1	0	1	0	0	1	1	0	1	1	0	13	0	1490.72	ACI33099.1;NP_001117025.1;CAD58715.1;CAD58716.1;ACN58706.1;ACN10920.1;NP_001117108.1;CAD58714.1;ACI32916.1;CAD89353.1	NP_001117108.1	485	497	no	no	2;3	3.9762e-09	175.88	By MS/MS	By MS/MS	By MS/MS	By MS/MS	By MS/MS	By MS/MS	By MS/MS	By MS/MS
DIVQFVPFR	PTGETAARDIVQFVPF	IVQFVPFRQFQNAPRE	R	D	I	F	R	Q	0	1	0	1	0	1	0	0	0	1	0	0	0	2	1	0	0	0	0	2	0	9	0	1119.61	ACN60210.1	ACN60210.1	224	232	yes	yes	2	0.0017974	105.52	By MS/MS	By MS/MS	By MS/MS	By matching	By matching	By MS/MS	By matching	By matching
DIVSEMGELGVLGPTIK	NRNEVFHRDIVSEMGE	GVLGPTIKGYGCAGTS	R	D	I	I	K	G	0	0	0	1	0	0	2	3	0	2	2	1	1	0	1	1	1	0	0	2	0	17	0	1756.93	ACI33980.1	ACI33980.1	98	114	yes	yes	2;3	6.7641e-07	151.8	By MS/MS	By MS/MS	By MS/MS	By MS/MS	By MS/MS	By MS/MS	By MS/MS	By MS/MS
DIVVLETMEDIDK	PEEYDHMKDIVVLETM	ETMEDIDKNGDGFIDL	K	D	I	D	K	N	0	0	0	3	0	0	2	0	0	2	1	1	1	0	0	0	1	0	0	2	0	13	0	1518.75	B5X4E0.1;ACI34171.1;B5X186.1;ACI33067.1	B5X4E0.1	191	203	no	no	2	1.3207e-05	143.76	By MS/MS	By matching	By matching	By matching	By matching	By matching	By MS/MS	By matching
DIWSGTPEGEFVSMGVYSSSNSYSVAEDLIYSFPVHIK	KAICDHMRDIWSGTPE	YSFPVHIKDKQWKIVD	R	D	I	I	K	D	1	0	1	2	0	0	3	3	1	3	1	1	1	2	2	8	1	1	3	4	0	38	0	4196.96	ACH70612.1;ACI33582.1	ACH70612.1	257	294	yes	no	3;4	4.6049e-21	135.02	By MS/MS	By MS/MS	By MS/MS	By MS/MS	By MS/MS	By MS/MS	By MS/MS	By MS/MS
DIYEAGEAR	AQAVKDAKDIYEAGEA	IYEAGEARWGTDEVKF	K	D	I	A	R	W	2	1	0	1	0	0	2	1	0	1	0	0	0	0	0	0	0	0	1	0	0	9	0	1022.47	ACI68517.1;ACI69495.1	ACI69495.1	179	187	no	no	2	0.00098244	125.97	By matching	By matching	By MS/MS	By matching	By matching	By matching	By matching	By matching
DIYLVPDSSLEDAR	KDPVQCSRDIYLVPDS	DSSLEDARKQGPYDVI	R	D	I	A	R	K	1	1	0	3	0	0	1	0	0	1	2	0	0	0	1	2	0	0	1	1	0	14	0	1591.77	ACI69371.1;ACH70628.1;NP_001116995.1;BAB84671.1	ACI69371.1	49	62	yes	no	2	0.066669	47.622	By matching	By matching	By matching	By matching	By matching	By matching	By matching	By MS/MS
DKDFAIETIK	FAFNGEFKDKDFAIET	DFAIETIKSTHGFWKA	K	D	K	I	K	S	1	0	0	2	0	0	1	0	0	2	0	2	0	1	0	0	1	0	0	0	0	10	1	1178.62	ACI66684.1	ACI66684.1	213	222	yes	yes	2	0.00087063	150.09	By MS/MS	By MS/MS	By MS/MS	By MS/MS	By MS/MS	By matching	By MS/MS	By MS/MS
DKDLLVAYYDVDYEK	DDNKDQMKDKDLLVAY	YYDVDYEKNPKGSNYW	K	D	K	E	K	N	1	0	0	4	0	0	1	0	0	0	2	2	0	0	0	0	0	0	3	2	0	15	1	1847.88	ACI34304.1;NP_001161991.1;ACS28414.1	NP_001161991.1	246	260	no	no	2;3	7.4579e-25	231.71	By MS/MS	By MS/MS	By MS/MS	By MS/MS	By MS/MS	By MS/MS	By MS/MS	By MS/MS
DKDLLVAYYDVDYEKNPK	DDNKDQMKDKDLLVAY	VDYEKNPKGSNYWRNR	K	D	K	P	K	G	1	0	1	4	0	0	1	0	0	0	2	3	0	0	1	0	0	0	3	2	0	18	2	2187.07	ACI34304.1;NP_001161991.1;ACS28414.1	NP_001161991.1	246	263	no	no	3	2.6128e-07	152.59	By matching	By matching	By matching	By MS/MS	By matching	By matching	By matching	By matching
DKDNFWLTR	AVLADIMKDKDNFWLT	KDNFWLTREEYQEKGV	K	D	K	T	R	E	0	1	1	2	0	0	0	0	0	0	1	1	0	1	0	0	1	1	0	0	0	9	1	1193.58	ACN10691.1;ACN10624.1;ACN10558.1;ACN58685.1	ACN10691.1	367	375	yes	no	2	0.0071151	125.74	By MS/MS	By MS/MS	By matching	By MS/MS	By matching	By MS/MS	By matching	By matching
DKEPDVLFVGDSLVQLLHQFEVWR	NHFVSNSKDKEPDVLF	LHQFEVWRELFSPLHA	K	D	K	W	R	E	0	1	0	3	0	2	2	1	1	0	4	1	0	2	1	1	0	1	0	4	0	24	1	2868.48	ACI70172.1;ACI67811.1;ACI69705.1	ACI70172.1	37	60	yes	no	3	1.4352e-05	96.016	By matching	By MS/MS	By matching	By matching	By matching	By matching	By matching	By matching
DKFPEVIINFPDPAAK	GEKIKDVRDKFPEVII	NFPDPAAKSDIVQLRG	R	D	K	A	K	S	2	0	1	2	0	0	1	0	0	2	0	2	0	2	3	0	0	0	0	1	0	16	1	1799.95	NP_001167124.1;ACN10888.1	NP_001167124.1	532	547	yes	no	3	0.00017712	114.64	By MS/MS	By MS/MS	By MS/MS	By MS/MS	By MS/MS	By MS/MS	By MS/MS	By MS/MS
DKGIVVGIK	VLFPQVIKDKGIVVGI	KGIVVGIKVDKGTAGL	K	D	K	I	K	V	0	0	0	1	0	0	0	2	0	2	0	2	0	0	0	0	0	0	0	2	0	9	1	927.575	NP_001117099.1;ACI70174.1;ACI68048.1;AAD11573.1;ACN12448.1;ACN10100.1	NP_001117099.1	98	106	yes	no	2	0.0065909	128.27	By MS/MS	By MS/MS	By matching	By MS/MS	By MS/MS	By MS/MS	By MS/MS	By MS/MS
DKGPIVESYIGFIESYR	EGSRFWIKDKGPIVES	IGFIESYRDPFGSRGE	K	D	K	Y	R	D	0	1	0	1	0	0	2	2	0	3	0	1	0	1	1	2	0	0	2	1	0	17	1	1971.99	NP_001133876.1;ACI34066.1	NP_001133876.1	302	318	yes	no	3	0.00073875	92.439	By matching	By matching	By matching	By matching	By matching	By matching	By matching	By MS/MS
DKGVLLGGCGDR	NSIILKARDKGVLLGG	LLGGCGDRSIRFRPAL	R	D	K	D	R	S	0	1	0	2	1	0	0	4	0	0	2	1	0	0	0	0	0	0	0	1	0	12	1	1245.61	ACI33512.1	ACI33512.1	459	470	no	no	2	6.7588e-06	158.11	By MS/MS	By MS/MS	By MS/MS	By MS/MS	By matching	By MS/MS	By MS/MS	By MS/MS
DKIWANYEEK	EEASRLRKDKIWANYE	IWANYEEKKVEEVVHV	K	D	K	E	K	K	1	0	1	1	0	0	2	0	0	1	0	2	0	0	0	0	0	1	1	0	0	10	1	1294.62	ACN60284.1	ACN60284.1	596	605	yes	yes	2	0.0044065	121.68	By matching	By matching	By matching	By MS/MS	By matching	By MS/MS	By matching	By MS/MS
DKLNNLVLFDK	KWSKGKVRDKLNNLVL	NNLVLFDKATYEKLNK	R	D	K	D	K	A	0	0	2	2	0	0	0	0	0	0	3	2	0	1	0	0	0	0	0	1	0	11	1	1317.73	AGH92503.1;ACN12526.1;ACN12284.1;ACN10173.1;ACN09937.1;ACI67712.1;ACI66620.1;ACH70866.1;AGH92514.1;ACN12364.1;ACN10017.1;ACI69780.1;ACI68693.1;ACI66416.1;ACI69593.1;ACI68348.1	AGH92503.1	42	52	yes	no	2	2.3791e-10	196.02	By MS/MS	By MS/MS	By MS/MS	By MS/MS	By MS/MS	By MS/MS	By MS/MS	By matching
DKLPHEAK	LWGKQTPKDKLPHEAK	DKLPHEAKAAKLKEKY	K	D	K	A	K	A	1	0	0	1	0	0	1	0	1	0	1	2	0	0	1	0	0	0	0	0	0	8	1	936.503	NP_001133170.1;ACN12594.1;ACN12243.1;ACN10239.1;ACN09896.1;ACM09096.1;ACM08578.1;ACH70874.1	NP_001133170.1	142	149	yes	no	2	0.0064529	120.31	By matching	By matching	By MS/MS	By matching	By matching	By matching	By matching	By matching
DKLTELQLR	NYAEIAAKDKLTELQL	KLTELQLRVRQLVEQV	K	D	K	L	R	V	0	1	0	1	0	1	1	0	0	0	3	1	0	0	0	0	1	0	0	0	0	9	1	1114.63	NP_001133740.1;ADM16088.1;ACI68476.1;ACI33816.1	NP_001133740.1	142	150	yes	no	2	0.013129	120.63	By matching	By matching	By matching	By matching	By matching	By matching	By matching	By matching
DKLTFLDEEDKDMYIK	AVAYATQKDKLTFLDE	EDKDMYIKWKGPSFEV	K	D	K	I	K	W	0	0	0	4	0	0	2	0	0	1	2	3	1	1	0	0	1	0	1	0	0	16	2	2001.96	NP_001133876.1;ACI34066.1	NP_001133876.1	421	436	yes	no	3	7.8677e-13	183.06	By MS/MS	By MS/MS	By matching	By MS/MS	By MS/MS	By MS/MS	By MS/MS	By MS/MS
DKNLMSLSGK	KCIVELAKDKNLMSLS	NLMSLSGKVLMTCDLS	K	D	K	G	K	V	0	0	1	1	0	0	0	1	0	0	2	2	1	0	0	2	0	0	0	0	0	10	1	1091.56	NP_001134326.1;ACI67074.1	NP_001134326.1	239	248	yes	no	2	0.033415	85.924	By matching	By matching	By MS/MS	By matching	By matching	By matching	By matching	By matching
DKPEWFLK	DTVNINLKDKPEWFLK	DKPEWFLKKNPLGLVP	K	D	K	L	K	K	0	0	0	1	0	0	1	0	0	0	1	2	0	1	1	0	0	1	0	0	0	8	1	1061.55	NP_001134944.1;ADM16117.1;ACI69600.1;ACI67658.1;ADM16204.1;ACI67152.1;ACM09222.1;ACI69202.1;ACI66990.1;ADM15991.1;ACI67535.1	NP_001134944.1	56	63	yes	no	2	0.01399	105.1	By matching	By MS/MS	By matching	By MS/MS	By matching	By matching	By MS/MS	By MS/MS
DKPLKDVSIHDCGK	EGTKTDGRDKPLKDVS	VSIHDCGKIEVEKPFA	R	D	K	G	K	I	0	0	0	3	1	0	0	1	1	1	1	3	0	0	1	1	0	0	0	1	0	14	2	1610.81	AGH92516.1;ACI69864.1;ACI67931.1;ACI69995.1;ACI68543.1	AGH92516.1	191	204	yes	no	2;3	4.7532e-24	204.17	By matching	By MS/MS	By MS/MS	By MS/MS	By MS/MS	By MS/MS	By MS/MS	By MS/MS
DKPTHPLDTALFWIEFVMR	ERLSSLHRDKPTHPLD	FWIEFVMRHKGAAHLR	R	D	K	M	R	H	1	1	0	2	0	0	1	0	1	1	2	1	1	2	2	0	2	1	0	1	0	19	1	2315.18	NP_001133343.1;ACI33061.1	NP_001133343.1	458	476	yes	no	3	0.0012425	83.894	By matching	By matching	By matching	By matching	By matching	By matching	By matching	By matching
DKSVVNAFWGK	________________	VVNAFWGKIKGKADVV	R	D	K	G	K	I	1	0	1	1	0	0	0	1	0	0	0	2	0	1	0	1	0	1	0	2	0	11	1	1249.65	CAA65955.1;CAA65952.1;ACN12414.1;ACN11251.1;ACN10067.1;ACN12527.1;ACN10174.1;P11251.2;NP_001117134.1;CAA32596.1	P11251.2	7	17	no	no	2	9.6361e-05	153.54	By matching	By MS/MS	By MS/MS	By MS/MS	By MS/MS	By MS/MS	By matching	By MS/MS
DKVHLGAVDATVHQGLASR	SAVKEQTKDKVHLGAV	VHQGLASRYGVRGFPT	K	D	K	S	R	Y	3	1	0	2	0	1	0	2	2	0	2	1	0	0	0	1	1	0	0	3	0	19	1	1973.04	ACI34364.1;ACN60302.1;ACN10934.1;ACI33422.1	ACI34364.1	214	232	no	no	3;4	2.5955e-22	203.17	By MS/MS	By MS/MS	By MS/MS	By MS/MS	By MS/MS	By MS/MS	By MS/MS	By MS/MS
DKYEIIGDVR	LTELAKMRDKYEIIGD	YEIIGDVRGKGLQIGV	R	D	K	V	R	G	0	1	0	2	0	0	1	1	0	2	0	1	0	0	0	0	0	0	1	1	0	10	1	1206.62	ACI33568.1	ACI33568.1	428	437	yes	yes	2	0.0011088	147.58	By MS/MS	By MS/MS	By MS/MS	By MS/MS	By MS/MS	By MS/MS	By MS/MS	By MS/MS
DLADELALVDVMEDK	CAVSILLRDLADELAL	LVDVMEDKLKGEMMDL	R	D	L	D	K	L	2	0	0	4	0	0	2	0	0	0	3	1	1	0	0	0	0	0	0	2	0	15	0	1674.8	NP_001133969.1;ACI34235.1;ACN11051.1	ACN11051.1	44	58	no	no	2;3	7.6854e-43	273.61	By MS/MS	By MS/MS	By MS/MS	By MS/MS	By MS/MS	By MS/MS	By MS/MS	By MS/MS
DLADELALVDVMEDKLK	CAVSILLRDLADELAL	DVMEDKLKGEMMDLQH	R	D	L	L	K	G	2	0	0	4	0	0	2	0	0	0	4	2	1	0	0	0	0	0	0	2	0	17	1	1915.98	NP_001133969.1;ACI34235.1;ACN11051.1	ACN11051.1	44	60	no	no	3	0.06492	41.495	By matching	By matching	By MS/MS	By matching	By matching	By matching	By matching	By matching
DLAGSIIGK	TTQVTIPKDLAGSIIG	LAGSIIGKGGQRIKQI	K	D	L	G	K	G	1	0	0	1	0	0	0	2	0	2	1	1	0	0	0	1	0	0	0	0	0	9	0	872.497	ACI33086.1;ACN11301.1;ACI32944.1	ACI33086.1	367	375	no	no	1	0.074341	62.107	By matching	By matching	By matching	By matching	By matching	By matching	By matching	By matching
DLAMTSLAQAIQDEK	VQKAQEVKDLAMTSLA	AQAIQDEKKEQWRAEG	K	D	L	E	K	K	3	0	0	2	0	2	1	0	0	1	2	1	1	0	0	1	1	0	0	0	0	15	0	1632.8	NP_001133163.1;AGH92539.1;ACI67853.1;ACH70848.1;ADM16197.1;ADM16180.1;ACN12404.1;ACN10057.1;ACM08938.1;ACI69301.1;ACI66802.2;ACI66540.1;ACI69329.1	NP_001133163.1	135	149	yes	no	2	8.6298e-27	241.3	By MS/MS	By MS/MS	By MS/MS	By MS/MS	By MS/MS	By MS/MS	By MS/MS	By MS/MS
DLDAAILVGSMPR	DKVELGFKDLDAAILV	ILVGSMPRKEGMERKD	K	D	L	P	R	K	2	1	0	2	0	0	0	1	0	1	2	0	1	0	1	1	0	0	0	1	0	13	0	1356.71	ACH70612.1;ACI33582.1;ACN10759.1;ACN12543.1;ACN10189.1;ACN12783.1;ACN10417.1;ACI69505.1	ACN12783.1	80	92	no	no	2	2.83e-20	226.42	By MS/MS	By MS/MS	By MS/MS	By MS/MS	By MS/MS	By MS/MS	By MS/MS	By MS/MS
DLEAQIQNPNK	DRAEVLIKDLEAQIQN	AQIQNPNKTICPELPN	K	D	L	N	K	T	1	0	2	1	0	2	1	0	0	1	1	1	0	0	1	0	0	0	0	0	0	11	0	1268.64	NP_001134006.1;ACI34298.1	NP_001134006.1	276	286	yes	no	2	5.4634e-23	247.96	By MS/MS	By MS/MS	By MS/MS	By MS/MS	By MS/MS	By MS/MS	By MS/MS	By MS/MS
DLEDALQR	KDAKLRIRDLEDALQR	DLEDALQRAKQDMARQ	R	D	L	Q	R	A	1	1	0	2	0	1	1	0	0	0	2	0	0	0	0	0	0	0	0	0	0	8	0	958.472	NP_001133687.1;ACN11271.1;ACI33701.1	NP_001133687.1	389	396	yes	no	2	1.4173e-06	139.97	By MS/MS	By matching	By MS/MS	By MS/MS	By MS/MS	By MS/MS	By matching	By matching
DLEEDHACIPLK	LHLEICLKDLEEDHAC	DHACIPLKKSDPVVSY	K	D	L	L	K	K	1	0	0	2	1	0	2	0	1	1	2	1	0	0	1	0	0	0	0	0	0	12	0	1438.68	ACN11358.1;ACN58670.1;NP_001133466.1;ACI33293.1	NP_001133466.1	560	571	no	no	2	4.2377e-05	132.56	By matching	By matching	By matching	By matching	By matching	By MS/MS	By MS/MS	By matching
DLEEDHACIPLKK	LHLEICLKDLEEDHAC	HACIPLKKSDPVVSYR	K	D	L	K	K	S	1	0	0	2	1	0	2	0	1	1	2	2	0	0	1	0	0	0	0	0	0	13	1	1566.77	ACN11358.1;ACN58670.1;NP_001133466.1;ACI33293.1	NP_001133466.1	560	572	no	no	3	0.0077645	72.531	By matching	By MS/MS	By MS/MS	By matching	By MS/MS	By matching	By matching	By matching
DLEEDHAGIPLK	LHLEICLKDLEEDHAG	DHAGIPLKKSDPVVSY	K	D	L	L	K	K	1	0	0	2	0	0	2	1	1	1	2	1	0	0	1	0	0	0	0	0	0	12	0	1335.67	ACN10751.1;ACN11125.1;ACN58590.1	ACN10751.1	560	571	yes	no	2	8.0465e-07	160.72	By MS/MS	By MS/MS	By MS/MS	By MS/MS	By MS/MS	By MS/MS	By MS/MS	By matching
DLEEDHAGIPLKK	LHLEICLKDLEEDHAG	HAGIPLKKSDPVVSYR	K	D	L	K	K	S	1	0	0	2	0	0	2	1	1	1	2	2	0	0	1	0	0	0	0	0	0	13	1	1463.76	ACN10751.1;ACN11125.1;ACN58590.1	ACN10751.1	560	572	yes	no	2;3	5.184e-09	190.36	By MS/MS	By MS/MS	By MS/MS	By MS/MS	By MS/MS	By MS/MS	By MS/MS	By MS/MS
DLEIERPIPGGK	VKAYNSRRDLEIERPI	ERPIPGGKVTVRTLTC	R	D	L	G	K	V	0	1	0	1	0	0	2	2	0	2	1	1	0	0	2	0	0	0	0	0	0	12	1	1322.72	ACI33423.1;ACI34120.1	ACI34120.1	230	241	no	no	2	3.4254e-08	184.98	By MS/MS	By MS/MS	By MS/MS	By MS/MS	By MS/MS	By MS/MS	By MS/MS	By MS/MS
DLFEDELVPLFEK	IFVGKIPRDLFEDELV	ELVPLFEKAGPIWDLR	R	D	L	E	K	A	0	0	0	2	0	0	3	0	0	0	3	1	0	2	1	0	0	0	0	1	0	13	0	1592.8	ACN60188.1;ACN11217.1	ACN60188.1	127	139	yes	no	2	0.00018906	113.53	By matching	By MS/MS	By MS/MS	By matching	By MS/MS	By MS/MS	By MS/MS	By matching
DLGAPLELLASSLHVWPDFHGNR	RHLSSMAKDLGAPLEL	WPDFHGNRSPLADPTL	K	D	L	N	R	S	2	1	1	2	0	0	1	2	2	0	5	0	0	1	2	2	0	1	0	1	0	23	0	2543.29	NP_001133658.1;ACI33652.1	NP_001133658.1	375	397	yes	no	3;4	0.011944	43.696	By matching	By MS/MS	By matching	By MS/MS	By MS/MS	By matching	By matching	By matching
DLGLAQTTATNTK	FGTQLMAKDLGLAQTT	QTTATNTKTPVPLGSL	K	D	L	T	K	T	2	0	1	1	0	1	0	1	0	0	2	1	0	0	0	0	4	0	0	0	0	13	0	1332.69	ACI33919.1	ACI33919.1	278	290	yes	yes	2	0.00060249	101.72	By matching	By matching	By matching	By matching	By matching	By matching	By matching	By MS/MS
DLGYLYFYR	CASEKPPKDLGYLYFY	LGYLYFYRRVTE____	K	D	L	Y	R	R	0	1	0	1	0	0	0	1	0	0	2	0	0	1	0	0	0	0	3	0	0	9	0	1208.59	NP_001135286.1;ACI34254.1	NP_001135286.1	840	848	yes	no	2	0.0028651	91.867	By matching	By matching	By matching	By matching	By matching	By matching	By MS/MS	By MS/MS
DLIVASIAVK	ALSVEALRDLIVASIA	IVASIAVKYTQSNSVC	R	D	L	V	K	Y	2	0	0	1	0	0	0	0	0	2	1	1	0	0	0	1	0	0	0	2	0	10	0	1027.63	NP_001133622.1;ACI33591.1;ACN10681.1	NP_001133622.1	416	425	no	no	2	0.0051073	85.355	By MS/MS	By matching	By matching	By MS/MS	By MS/MS	By matching	By MS/MS	By matching
DLLEVADILEK	YGIQGFCKDLLEVADI	EVADILEKATESVPSE	K	D	L	E	K	A	1	0	0	2	0	0	2	0	0	1	3	1	0	0	0	0	0	0	0	1	0	11	0	1256.69	ACN12485.1;ACN10134.1;ACM08593.1	ACN12485.1	99	109	yes	no	2	9.8161e-05	138.45	By matching	By matching	By matching	By MS/MS	By MS/MS	By MS/MS	By MS/MS	By MS/MS
DLLFHALGR	MPTVSVKRDLLFHALG	LLFHALGRTYTDEEFD	R	D	L	G	R	T	1	1	0	1	0	0	0	1	1	0	3	0	0	1	0	0	0	0	0	0	0	9	0	1040.58	NP_001133289.1;ACI32979.1	NP_001133289.1	9	17	yes	no	2	0.0012775	115.71	By matching	By matching	By matching	By matching	By matching	By MS/MS	By matching	By matching
DLLFSAVDPNCIGGIIFFHETLYQMSDK	EENRRTFRDLLFSAVD	TLYQMSDKGVLFPQVI	R	D	L	D	K	G	1	0	1	3	1	1	1	2	1	3	3	1	1	3	1	2	1	0	1	1	0	28	0	3229.55	NP_001117099.1;ACI70174.1;ACI68048.1;AAD11573.1;ACN12448.1;ACN10100.1	NP_001117099.1	61	88	yes	no	2;3	1.0102e-19	161.56	By MS/MS	By MS/MS	By matching	By MS/MS	By MS/MS	By MS/MS	By MS/MS	By MS/MS
DLLHPSPDEEK	________________	HPSPDEEKRSHKKKRL	K	D	L	E	K	R	0	0	0	2	0	0	2	0	1	0	2	1	0	0	2	1	0	0	0	0	0	11	0	1278.61	ADM16114.1;ADM15967.1;ACN12409.1;ACN10062.1;ACI69987.1;ACI68582.1;ACI67409.1	ADM16114.1	6	16	yes	no	2	0.0017967	93.561	By matching	By matching	By matching	By matching	By matching	By matching	By matching	By matching
DLLHPTSEEEK	________________	HPTSEEEKRSHKKKRL	K	D	L	E	K	R	0	0	0	1	0	0	3	0	1	0	2	1	0	0	1	1	1	0	0	0	0	11	0	1296.62	AGH92543.1;ACI68736.1;ACI66295.1;ACH71006.1;ACH71004.1;ACI68059.1	AGH92543.1	6	16	yes	no	2	4.5814e-06	166.29	By MS/MS	By matching	By MS/MS	By matching	By MS/MS	By matching	By matching	By matching
DLLNAELGEIMGK	TLSKGELKDLLNAELG	ELGEIMGKNTDQAKVD	K	D	L	G	K	N	1	0	1	1	0	0	2	2	0	1	3	1	1	0	0	0	0	0	0	0	0	13	0	1401.72	ADM16289.1;ADM16216.1;ADM16161.1;ACN12237.1;ACN09890.1;ACI70094.1;ACI69647.1;ACI69613.1;ACI69222.1;ACI67171.1	ADM16289.1	35	47	yes	no	2	1.4568e-27	249.32	By MS/MS	By matching	By matching	By matching	By MS/MS	By matching	By MS/MS	By MS/MS
DLLVAYYDVDYEK	NKDQMKDKDLLVAYYD	YYDVDYEKNPKGSNYW	K	D	L	E	K	N	1	0	0	3	0	0	1	0	0	0	2	1	0	0	0	0	0	0	3	2	0	13	0	1604.76	ACN10701.1;ACI33158.1;ACH85350.1;ACI34304.1;NP_001161991.1;ACS28414.1	NP_001161991.1	248	260	no	no	2	2.4718e-11	194.86	By MS/MS	By MS/MS	By MS/MS	By MS/MS	By MS/MS	By MS/MS	By MS/MS	By matching
DLLVFFDMAYQGFASGDIDR	IADLVKKRDLLVFFDM	FASGDIDRDAWAVRHF	R	D	L	D	R	D	2	1	0	4	0	1	0	2	0	1	2	0	1	3	0	1	0	0	1	1	0	20	0	2279.06	ACI34022.1	ACI34022.1	235	254	yes	yes	2;3	1.9919e-66	300.86	By MS/MS	By MS/MS	By MS/MS	By MS/MS	By MS/MS	By MS/MS	By MS/MS	By MS/MS
DLMENELSGFLK	TLSRRELRDLMENELS	NELSGFLKSQKDPATV	R	D	L	L	K	S	0	0	1	1	0	0	2	1	0	0	3	1	1	1	0	1	0	0	0	0	0	12	0	1394.68	AGH92588.1;ACM08860.1;ACM08338.1;ACI69007.1;ACI67915.1	AGH92588.1	36	47	yes	no	2	0.00097587	95.428	By matching	By MS/MS	By matching	By matching	By matching	By matching	By matching	By matching
DLMVGDEASELR	KVGNIEIKDLMVGDEA	GDEASELRSMLEVNYP	K	D	L	L	R	S	1	1	0	2	0	0	2	1	0	0	2	0	1	0	0	1	0	0	0	1	0	12	0	1333.62	ACN10691.1;ACN10624.1;ACN10558.1	ACN10691.1	54	65	yes	no	2	9.2617e-05	122.46	By MS/MS	By matching	By MS/MS	By MS/MS	By MS/MS	By matching	By matching	By matching
DLNDIGDIQR	NVEDPEAKDLNDIGDI	NDIGDIQRLRPGYLEA	K	D	L	Q	R	L	0	1	1	3	0	1	0	1	0	2	1	0	0	0	0	0	0	0	0	0	0	10	0	1157.57	ACI66684.1	ACI66684.1	169	178	yes	yes	2	4.6857e-08	197.73	By MS/MS	By matching	By matching	By MS/MS	By MS/MS	By matching	By MS/MS	By MS/MS
DLNHICVISETGK	LDYNEYFRDLNHICVI	CVISETGKEKYKA___	R	D	L	G	K	E	0	0	1	1	1	0	1	1	1	2	1	1	0	0	0	1	1	0	0	1	0	13	0	1484.73	ADM16037.1;ACM08819.1;ACI69487.1;ACH70616.1	ADM16037.1	201	213	yes	no	2;3	2.8052e-07	157.33	By MS/MS	By MS/MS	By MS/MS	By MS/MS	By MS/MS	By MS/MS	By MS/MS	By MS/MS
DLNLPVVGSQIVGIMPLR	EEICSAAKDLNLPVVG	IVGIMPLRAVLDCADF	K	D	L	L	R	A	0	1	1	1	0	1	0	2	0	2	3	0	1	0	2	1	0	0	0	3	0	18	0	1920.09	NP_001158793.1;ACN10483.1	NP_001158793.1	259	276	yes	no	2;3	2.2667e-75	313.51	By MS/MS	By MS/MS	By MS/MS	By MS/MS	By MS/MS	By MS/MS	By MS/MS	By MS/MS
DLPLAQGIK	TCTINYSKDLPLAQGI	LPLAQGIKFE______	K	D	L	I	K	F	1	0	0	1	0	1	0	1	0	1	2	1	0	0	1	0	0	0	0	0	0	9	0	953.555	NP_001133255.1;ACI32910.1	NP_001133255.1	530	538	yes	no	2	0.004658	86.136	By matching	By matching	By matching	By MS/MS	By MS/MS	By matching	By matching	By matching
DLPNHLDK	TGKDAYIKDLPNHLDK	DLPNHLDKFEAVMAKN	K	D	L	D	K	F	0	0	1	2	0	0	0	0	1	0	2	1	0	0	1	0	0	0	0	0	0	8	0	950.482	ACI69603.1;ACI68362.1;AAB20709.1;ACN12309.1;ACN09962.1;ACI70112.1;ACI69773.1;ADM16185.1;ACI68586.1;AH003813.1;	ACN12309.1	122	129	no	no	2	0.0022977	102.62	By MS/MS	By MS/MS	By MS/MS	By MS/MS	By MS/MS	By MS/MS	By matching	By matching
DLPNHLDKFEAVMAK	TGKDAYIKDLPNHLDK	KFEAVMAKNKTGFLVD	K	D	L	A	K	N	2	0	1	2	0	0	1	0	1	0	2	2	1	1	1	0	0	0	0	1	0	15	1	1726.87	ACI69603.1;ACI68362.1;ACN12309.1;ACN09962.1;ACI70112.1;ACI69773.1;ADM16185.1;ACI68586.1	ACN12309.1	122	136	no	no	2;3	2.7548e-18	217.79	By MS/MS	By MS/MS	By MS/MS	By MS/MS	By MS/MS	By MS/MS	By MS/MS	By MS/MS
DLPTEPPYTAYVGNLPFNTVQGDIDAIFK	PGGPRKQKDLPTEPPY	GDIDAIFKDLNVRSVR	K	D	L	F	K	D	2	0	2	3	0	1	1	2	0	2	2	1	0	2	4	0	3	0	2	2	0	29	0	3194.58	NP_001133347.1;ACN10439.1;ACI33070.1	NP_001133347.1	35	63	yes	no	3	2.106e-14	134.28	By MS/MS	By MS/MS	By MS/MS	By MS/MS	By MS/MS	By MS/MS	By matching	By matching
DLQMINIGLR	IASLTGSKDLQMINIG	QMINIGLRVLSRPVAA	K	D	L	L	R	V	0	1	1	1	0	1	0	1	0	2	2	0	1	0	0	0	0	0	0	0	0	10	0	1171.64	ACN11082.1;NP_001134876.1;ACI69259.1	ACN11082.1	88	97	yes	no	2	2.9177e-05	167.12	By MS/MS	By MS/MS	By MS/MS	By MS/MS	By MS/MS	By MS/MS	By MS/MS	By MS/MS
DLQNVNITLR	VPVITGSKDLQNVNIT	QNVNITLRILFRPVTS	K	D	L	L	R	I	0	1	2	1	0	1	0	0	0	1	2	0	0	0	0	0	1	0	0	1	0	10	0	1184.65	NP_001133602.1;ACI33553.1	NP_001133602.1	83	92	yes	no	2	0.00025724	139.76	By MS/MS	By MS/MS	By MS/MS	By MS/MS	By MS/MS	By MS/MS	By MS/MS	By MS/MS
DLQQYQSQAK	QEDEQLGRDLQQYQSQ	QQYQSQAKQLFRKLND	R	D	L	A	K	Q	1	0	0	1	0	4	0	0	0	0	1	1	0	0	0	1	0	0	1	0	0	10	0	1207.58	ACM09495.1;ACM09163.1	ACM09495.1	29	38	yes	no	2	0.00062843	107.09	By matching	By matching	By matching	By matching	By MS/MS	By matching	By matching	By matching
DLQSSEELSTHLSSLFTEDQIYR	IVEKPFGRDLQSSEEL	FTEDQIYRIDHYLGKE	R	D	L	Y	R	I	0	1	0	2	0	2	3	0	1	1	4	0	0	1	0	5	2	0	1	0	0	23	0	2697.28	NP_001135196.1;ACI33164.1	NP_001135196.1	180	202	yes	no	2;3	6.842e-12	151.63	By MS/MS	By MS/MS	By MS/MS	By MS/MS	By MS/MS	By MS/MS	By MS/MS	By MS/MS
DLSADIILDMATLTGAQGISTGK	DGVVYASKDLSADIIL	AQGISTGKYHCAVMTN	K	D	L	G	K	Y	3	0	0	3	0	1	0	3	0	3	3	1	1	0	0	2	3	0	0	0	0	23	0	2290.17	NP_001133677.1;ACI33685.1	NP_001133677.1	359	381	yes	no	2	1.645e-07	122.35	By matching	By matching	By matching	By matching	By matching	By matching	By matching	By matching
DLTDDLKGELTGNFENVVLGLLMTAPVYDAYELR	AYKQTVGKDLTDDLKG	VYDAYELRNAMKGAGT	K	D	L	L	R	N	2	1	2	4	0	0	3	3	0	0	7	1	1	1	1	0	3	0	2	3	0	34	1	3783.89	ACI68517.1;ACI69495.1	ACI69495.1	65	98	no	no	3	0.055065	23.437	By matching	By matching	By matching	By matching	By matching	By matching	By MS/MS	By matching
DLTDYLMK	LRLDLAGRDLTDYLMK	DLTDYLMKILTERGYS	R	D	L	M	K	I	0	0	0	2	0	0	0	0	0	0	2	1	1	0	0	0	1	0	1	0	0	8	0	997.479	O42161.1;NP_001116997.1;ACN11317.1;ACI33371.1;AAB65430.1;ACI67042.1;NP_001134991.1;ACI69763.1;NP_001133115.1;NP_001117011.1;ACH70896.1;ACH70895.1;ACH70894.1;ACH70714.1;AAG25672.1	O42161.1	184	191	no	no	1;2	6.823e-05	167.24	By MS/MS	By MS/MS	By MS/MS	By MS/MS	By MS/MS	By MS/MS	By MS/MS	By matching
DLTPLATAYAR	CMVNDMLKDLTPLATA	PLATAYARARGSDRMS	K	D	L	A	R	A	3	1	0	1	0	0	0	0	0	0	2	0	0	0	1	0	2	0	1	0	0	11	0	1190.63	NP_001133622.1;ACI33591.1;ACN10681.1	NP_001133622.1	295	305	no	no	2	6.3048e-05	144.7	By MS/MS	By MS/MS	By MS/MS	By MS/MS	By MS/MS	By MS/MS	By MS/MS	By MS/MS
DLTTSAAVTQCYR	HNMYREYRDLTTSAAV	AAVTQCYRDMGARHRA	R	D	L	Y	R	D	2	1	0	1	1	1	0	0	0	0	1	0	0	0	0	1	3	0	1	1	0	13	0	1484.69	O57561.1;NP_001116999.1;ADM15926.1;ACI69714.1;ACI66940.1;ACI66513.1;ACI66120.1;ACH70788.1;AAC03021.1;ACN12709.1;ACN10349.1;ACN12415.1;ACN10068.1	O57561.1	99	111	yes	no	2	2.885e-15	215.34	By MS/MS	By MS/MS	By MS/MS	By MS/MS	By MS/MS	By MS/MS	By MS/MS	By MS/MS
DLTVEEACDLGR	VDSGLKQKDLTVEEAC	EEACDLGRRAIYQATY	K	D	L	G	R	R	1	1	0	2	1	0	2	1	0	0	2	0	0	0	0	0	1	0	0	1	0	12	0	1376.62	ACH85299.1;AGH92509.1;ACM09015.1;ACM08758.1;ACM08263.1	ACH85299.1	211	222	yes	no	2	0.065689	48.568	By matching	By matching	By matching	By matching	By matching	By matching	By matching	By matching
DLVGDLQGELGGK	AYKTLHGKDLVGDLQG	LQGELGGKFETLVVAL	K	D	L	G	K	F	0	0	0	2	0	1	1	4	0	0	3	1	0	0	0	0	0	0	0	1	0	13	0	1299.67	ACN12538.1;ACN10184.1;NP_001134508.1;ACI67810.1	ACN12538.1	62	74	yes	no	2	4.9881e-15	211.83	By MS/MS	By MS/MS	By MS/MS	By MS/MS	By MS/MS	By MS/MS	By MS/MS	By MS/MS
DLVILLFETALLSSGFSLDDPQTHSNR	DKNDKAVKDLVILLFE	DPQTHSNRIYRMIKLG	K	D	L	N	R	I	1	1	1	3	0	1	1	1	1	1	6	0	0	2	1	4	2	0	0	1	0	27	0	2987.52	NP_001117004.1;AGT57169.1;AAD30275.1;AGT57170.1	NP_001117004.1	650	676	no	no	3	3.1943e-33	199.61	By MS/MS	By matching	By MS/MS	By MS/MS	By MS/MS	By MS/MS	By MS/MS	By MS/MS
DLYANTVLSGGTTMYPGIADR	KCDVDIRKDLYANTVL	MYPGIADRMQKEITSL	K	D	L	D	R	M	2	1	1	2	0	0	0	3	0	1	2	0	1	0	1	1	3	0	2	1	0	21	0	2214.06	O42161.1;NP_001116997.1;ACN11317.1;ACI33371.1;AAB65430.1;ACI67042.1	O42161.1	292	312	yes	no	2;3	4.1134e-81	322.67	By MS/MS	By MS/MS	By MS/MS	By MS/MS	By MS/MS	By MS/MS	By MS/MS	By MS/MS
DMASFNERPIIFALSNPTSK	AFTEKIIKDMASFNER	ALSNPTSKAECTAEQC	K	D	M	S	K	A	2	1	2	1	0	0	1	0	0	2	1	1	1	2	2	3	1	0	0	0	0	20	1	2237.12	ACN10606.1	ACN10606.1	438	457	yes	yes	2;3	1.2622e-10	167.9	By MS/MS	By MS/MS	By MS/MS	By MS/MS	By MS/MS	By MS/MS	By MS/MS	By MS/MS
DMAVLIAQNFK	KSNLGLLRDMAVLIAQ	VLIAQNFKCNPERGNF	R	D	M	F	K	C	2	0	1	1	0	1	0	0	0	1	1	1	1	1	0	0	0	0	0	1	0	11	0	1248.65	NP_001133686.1;ACI33700.1	NP_001133686.1	294	304	yes	no	2	0.012532	103.21	By matching	By MS/MS	By matching	By matching	By matching	By matching	By matching	By matching
DMDTYTYR	ETLPSITKDMDTYTYR	DMDTYTYRLPIGVCAG	K	D	M	Y	R	L	0	1	0	2	0	0	0	0	0	0	0	0	1	0	0	0	2	0	2	0	0	8	0	1063.43	NP_001136188.1;ACI34215.1;ACI34202.1;ACN58716.1	NP_001136188.1	156	163	no	no	2	0.00013004	157.68	By MS/MS	By MS/MS	By MS/MS	By MS/MS	By MS/MS	By MS/MS	By MS/MS	By MS/MS
DMEFTIYDDDDVAPFLVGLEER	VSIGIVGKDMEFTIYD	FLVGLEERPQRKVVQA	K	D	M	E	R	P	1	1	0	5	0	0	3	1	0	1	2	0	1	2	1	0	1	0	1	2	0	22	0	2588.16	ACN12455.1;ACN10106.1;ACI67972.1;ACI67883.1;ACI66688.1;ACI66511.1	ACN12455.1	218	239	yes	no	2	0.00066888	75.064	By matching	By matching	By matching	By matching	By matching	By matching	By matching	By matching
DMEFTIYDDGDVASFLEGLEERPQR	VSVGIVGKDMEFTIYD	GLEERPQRRVAQPDDE	K	D	M	Q	R	R	1	2	0	4	0	1	4	2	0	1	2	0	1	2	1	1	1	0	1	1	0	25	1	2931.32	ACI67932.1;ACH70727.1;ADM16017.1;ACI68584.1	ACI67932.1	218	242	yes	no	3	8.8495e-05	79.293	By matching	By matching	By matching	By MS/MS	By matching	By MS/MS	By MS/MS	By MS/MS
DMFDADKDR	KAGNLNMRDMFDADKD	MFDADKDRFSKFSTTL	R	D	M	D	R	F	1	1	0	4	0	0	0	0	0	0	0	1	1	1	0	0	0	0	0	0	0	9	1	1111.46	ACN10743.1;ACI70163.1;ACI69921.1	ACN10743.1	27	35	yes	no	2	0.0059189	131.52	By matching	By matching	By MS/MS	By matching	By matching	By matching	By matching	By matching
DMGDMGLLGITAPVDYGGSGLGYLDHVIVMEEMSR	VGMRDFWKDMGDMGLL	IVMEEMSRVSAAVALS	K	D	M	S	R	V	1	1	0	4	0	0	2	7	1	2	4	0	4	0	1	2	1	0	2	3	0	35	0	3697.71	ACI33497.1	ACI33497.1	76	110	yes	yes	3	1.4066e-06	69.576	By MS/MS	By MS/MS	By MS/MS	By MS/MS	By MS/MS	By MS/MS	By MS/MS	By MS/MS
DMGGHHIVALCVLK	RLAREIMKDMGGHHIV	IVALCVLKGGYKFFAD	K	D	M	L	K	G	1	0	0	1	1	0	0	2	2	1	2	1	1	0	0	0	0	0	0	2	0	14	0	1548.79	ADM16037.1;ACM08819.1;ACI69487.1;ACH70616.1	ADM16037.1	56	69	yes	no	3	1.0159e-05	136.53	By MS/MS	By MS/MS	By MS/MS	By MS/MS	By MS/MS	By MS/MS	By MS/MS	By MS/MS
DMGVLIGK	SEIFEDTKDMGVLIGK	DMGVLIGKGGVYGQTF	K	D	M	G	K	G	0	0	0	1	0	0	0	2	0	1	1	1	1	0	0	0	0	0	0	1	0	8	0	831.452	ACI33568.1	ACI33568.1	471	478	yes	yes	1	0.031315	85.359	By matching	By matching	By matching	By matching	By matching	By matching	By matching	By MS/MS
DMLEAGILEPFLVK	EGEGAALKDMLEAGIL	ILEPFLVKHWGIKLAT	K	D	M	V	K	H	1	0	0	1	0	0	2	1	0	1	3	1	1	1	1	0	0	0	0	1	0	14	0	1573.84	NP_001133979.1;ACI34253.1	NP_001133979.1	491	504	yes	no	2	4.8649e-08	157.2	By matching	By MS/MS	By matching	By MS/MS	By matching	By matching	By MS/MS	By MS/MS
DMLYEVVK	________________	DMLYEVVKEVQAGSLA	R	D	M	V	K	E	0	0	0	1	0	0	1	0	0	0	1	1	1	0	0	0	0	0	1	2	0	8	0	995.5	ACI69507.1;ACN12584.1;ACN12199.1;ACN10229.1;ACN09852.1;ACI67025.1;ACH70975.1;NP_001133205.1;ACN12174.1;ACN09827.1;ACH70976.1;ACM08331.1	ACI69507.1	7	14	yes	no	2	0.0010952	114.28	By MS/MS	By MS/MS	By MS/MS	By matching	By MS/MS	By matching	By MS/MS	By matching
DMPFYGGLCAFMHSGPVVAMIWEGLNVVK	KQHYIDLKDMPFYGGL	WEGLNVVKNGRLMLGE	K	D	M	V	K	N	2	0	1	1	1	0	1	4	1	1	2	1	3	2	2	1	0	1	1	4	0	29	0	3224.53	NP_001134716.1;AGH92528.1;ADM16016.1;ACN12689.1;ACN10329.1;ACI68568.1	NP_001134716.1	57	85	yes	no	3	1.2661e-07	91.416	By MS/MS	By matching	By matching	By MS/MS	By MS/MS	By MS/MS	By matching	By MS/MS
DMPFYGGLCSFMHSGPVVAMIWEGLNIVK	KQHYIDLKDMPFYGGL	WEGLNIVKNGRLMLGE	K	D	M	V	K	N	1	0	1	1	1	0	1	4	1	2	2	1	3	2	2	2	0	1	1	3	0	29	0	3254.54	NP_001133149.1;ACH70800.1	NP_001133149.1	57	85	yes	no	3	0.067619	18.606	By matching	By matching	By matching	By MS/MS	By matching	By matching	By matching	By matching
DMPILQCHGEMDPMIPVQFGAMTAEK	AASASGNRDMPILQCH	FGAMTAEKLKVIVNPQ	R	D	M	E	K	L	2	0	0	2	1	2	2	2	1	2	1	1	4	1	3	0	1	0	0	1	0	26	0	2945.33	NP_001133254.1;ACM09734.1;ACI32909.1	NP_001133254.1	166	191	yes	no	3	1.4552e-09	115.96	By matching	By MS/MS	By matching	By MS/MS	By MS/MS	By MS/MS	By MS/MS	By MS/MS
DMQMVQSQMEAIVTDLVSR	ITLEGPTKDMQMVQSQ	IVTDLVSRMDYREISV	K	D	M	S	R	M	1	1	0	2	0	3	1	0	0	1	1	0	3	0	0	2	1	0	0	3	0	19	0	2180.03	NP_001167124.1;ACN10888.1	NP_001167124.1	413	431	yes	no	2;3	5.6578e-18	198.05	By MS/MS	By MS/MS	By MS/MS	By MS/MS	By MS/MS	By MS/MS	By MS/MS	By MS/MS
DMQPTHPIR	EAFDISKKDMQPTHPI	MQPTHPIRLGLALNFS	K	D	M	I	R	L	0	1	0	1	0	1	0	0	1	1	0	0	1	0	2	0	1	0	0	0	0	9	0	1093.53	ACI68704.1	ACI68704.1	159	167	yes	yes	2	6.7044e-05	169.65	By MS/MS	By MS/MS	By MS/MS	By MS/MS	By MS/MS	By MS/MS	By MS/MS	By MS/MS
DMTLLWGSGSPPCWR	________________	SGSPPCWRVMIALEEK	K	D	M	W	R	V	0	1	0	1	1	0	0	2	0	0	2	0	1	0	2	2	1	2	0	0	0	15	0	1761.8	ACM09168.1;ACM08643.1	ACM08643.1	4	18	no	no	2	1.2663e-33	255.08	By MS/MS	By MS/MS	By MS/MS	By MS/MS	By MS/MS	By MS/MS	By MS/MS	By MS/MS
DMVILPEMVGSMVGVYNGK	EVVKTHLRDMVILPEM	MVGVYNGKTFNQVEIK	R	D	M	G	K	T	0	0	1	1	0	0	1	3	0	1	1	1	3	0	1	1	0	0	1	4	0	19	0	2037.99	NP_001134215.1;NP_001117003.1;ACI66641.1;ACH70998.1;AAD16877.1;ACN12355.1;ACN10008.1;ACN12250.1;ACN09903.1	NP_001134215.1	82	100	yes	no	2	2.3953e-22	205.98	By MS/MS	By MS/MS	By MS/MS	By MS/MS	By MS/MS	By MS/MS	By MS/MS	By MS/MS
DNDKNNDGYIDYAEFAR	SLIDDVLRDNDKNNDG	IDYAEFARSLE_____	R	D	N	A	R	S	2	1	3	4	0	0	1	1	0	1	0	1	0	1	0	0	0	0	2	0	0	17	1	2018.86	NP_001134099.1;ACI66224.1	NP_001134099.1	133	149	yes	no	2;3	8.2158e-09	157.07	By MS/MS	By MS/MS	By MS/MS	By MS/MS	By MS/MS	By MS/MS	By MS/MS	By MS/MS
DNFQIFDFSLTEDEMK	SFSAHRIKDNFQIFDF	SLTEDEMKAIEGLNKD	K	D	N	M	K	A	0	0	1	3	0	1	2	0	0	1	1	1	1	3	0	1	1	0	0	0	0	16	0	1977.87	NP_001139958.1;ACM08888.1	NP_001139958.1	282	297	yes	no	2	2.5803e-26	229.02	By matching	By matching	By matching	By matching	By matching	By matching	By MS/MS	By matching
DNGEWEVVEGYR	SVSFPIKRDNGEWEVV	WEVVEGYRAQHSQHRT	R	D	N	Y	R	A	0	1	1	1	0	0	3	2	0	0	0	0	0	0	0	0	0	1	1	2	0	12	0	1451.63	NP_001117108.1;CAD58714.1;ACI32916.1	NP_001117108.1	106	117	yes	no	2	8.4018e-13	213.99	By MS/MS	By MS/MS	By MS/MS	By MS/MS	By MS/MS	By MS/MS	By MS/MS	By MS/MS
DNHLLGTFDLTGIPPAPR	EGERPLTKDNHLLGTF	TGIPPAPRGVPQIEVT	K	D	N	P	R	G	1	1	1	2	0	0	0	2	1	1	3	0	0	1	3	0	2	0	0	0	0	18	0	1933.01	NP_001135114.1;ACI33778.1	NP_001135114.1	473	490	yes	no	2;3	8.4947e-20	200.6	By MS/MS	By MS/MS	By MS/MS	By MS/MS	By MS/MS	By MS/MS	By MS/MS	By MS/MS
DNIITVIEGK				D	N	G	K		0	0	1	1	0	0	1	1	0	3	0	1	0	0	0	0	1	0	0	1	0	10	0	1100.61		REV__NP_001134009.1			yes	no	2	0.0025072	92.239	By MS/MS	By MS/MS	By MS/MS	By MS/MS	By matching	By MS/MS	By MS/MS	By matching
DNLHTEGDHTLDVK	GNKCTVLRDNLHTEGD	GDHTLDVKMRPTATDT	R	D	N	V	K	M	0	0	1	3	0	0	1	1	2	0	2	1	0	0	0	0	2	0	0	1	0	14	0	1592.74	ACN12229.1;ACN09882.1;ACI68511.1;ACI66108.1	ACN12229.1	78	91	yes	no	2;3	1.7577e-08	169.3	By MS/MS	By MS/MS	By matching	By matching	By MS/MS	By MS/MS	By matching	By matching
DNLTLWTSDMQGDGEEQNK	TLIMQLLRDNLTLWTS	GDGEEQNKEALQDVED	R	D	N	N	K	E	0	0	2	3	0	2	2	2	0	0	2	1	1	0	0	1	2	1	0	0	0	19	0	2179.93	ACI34249.1	ACI34249.1	226	244	yes	yes	2	9.2883e-32	241.11	By matching	By MS/MS	By matching	By matching	By matching	By matching	By MS/MS	By matching
DNPLMQYVLNHSLR	FKSHSGAKDNPLMQYV	YVLNHSLREHPALKKL	K	D	N	L	R	E	0	1	2	1	0	1	0	0	1	0	3	0	1	0	1	1	0	0	1	1	0	14	0	1698.85	ACI67838.1	ACI67838.1	47	60	yes	yes	2;3	1.1894e-34	263.72	By MS/MS	By MS/MS	By MS/MS	By MS/MS	By MS/MS	By MS/MS	By MS/MS	By MS/MS
DNSTMGYMMAK	IMKAQALRDNSTMGYM	TMGYMMAKKHLEINPD	R	D	N	A	K	K	1	0	1	1	0	0	0	1	0	0	0	1	3	0	0	1	1	0	1	0	0	11	0	1247.5	NP_001117004.1;AGT57169.1;AAD30275.1;AGT57170.1	NP_001117004.1	610	620	no	no	2	4.4607e-16	220.29	By MS/MS	By MS/MS	By MS/MS	By MS/MS	By MS/MS	By MS/MS	By MS/MS	By MS/MS
DNTVEHLLPLFLAQLK	GLSTILGKDNTVEHLL	PLFLAQLKDECPEVRL	K	D	N	L	K	D	1	0	1	1	0	1	1	0	1	0	5	1	0	1	1	0	1	0	0	1	0	16	0	1850.03	ACN58704.1;ACN58639.1	ACN58704.1	357	372	no	no	3	0.00015112	113.25	By MS/MS	By matching	By matching	By MS/MS	By matching	By MS/MS	By MS/MS	By MS/MS
DNYVPEVSALDQEIIEVDPDTK	QEEERERRDNYVPEVS	IEVDPDTKEMLKLLDF	R	D	N	T	K	E	1	0	1	4	0	1	3	0	0	2	1	1	0	0	2	1	1	0	1	3	0	22	0	2488.19	NP_001139966.1;ACN12343.1;ACN09996.1;ACM08935.1;ACN12213.1;ACN09866.1;ACM09279.1;ACH85280.1;AGH92620.1;ACN12349.1;ACN10002.1;ACM09620.1;ACM08734.1	NP_001139966.1	82	103	no	no	2;3	5.7001e-36	237.39	By MS/MS	By MS/MS	By MS/MS	By MS/MS	By MS/MS	By MS/MS	By MS/MS	By MS/MS
DPCFATGDGLIQLYDNFLSDFDHR	LKLTDFVKDPCFATGD	FLSDFDHRINPLSLVE	K	D	P	H	R	I	1	1	1	5	1	1	0	2	1	1	3	0	0	3	1	1	1	0	1	0	0	24	0	2815.25	NP_001133203.1;ACH70971.1;ACH70972.1	NP_001133203.1	36	59	yes	no	3	1.2761e-07	113.51	By MS/MS	By matching	By matching	By matching	By matching	By MS/MS	By MS/MS	By matching
DPDMVWDFWSLRPECMHQVSFLFSDR	RNPQTHLKDPDMVWDF	VSFLFSDRGLPDGFRH	K	D	P	D	R	G	0	2	0	4	1	1	1	0	1	0	2	0	2	3	2	3	0	2	0	2	0	26	1	3299.46	ACN11170.1;NP_001133774.1;ACI33877.1;ACI69791.1	ACN11170.1	178	203	no	no	3;4	4.5951e-19	155.08	By MS/MS	By MS/MS	By MS/MS	By MS/MS	By MS/MS	By MS/MS	By MS/MS	By MS/MS
DPEAPIFQVADYGLVADLFK	KTIVAINKDPEAPIFQ	GLVADLFKAVPEMTAA	K	D	P	F	K	A	3	0	0	3	0	1	1	1	0	1	2	1	0	2	2	0	0	0	1	2	0	20	0	2207.11	ACH85298.1;ACI67395.1;ACI66876.1	ACH85298.1	302	321	yes	no	2	5.8755e-41	252.44	By MS/MS	By MS/MS	By MS/MS	By MS/MS	By MS/MS	By MS/MS	By MS/MS	By MS/MS
DPEEIEKEEQAAAEK	MPDLYFYRDPEEIEKE	EEQAAAEKAVGKEEFQ	R	D	P	E	K	A	3	0	0	1	0	1	6	0	0	1	0	2	0	0	1	0	0	0	0	0	0	15	1	1714.79	NP_001134397.1;B5DGB6.1;ACI70158.1;ACI68951.1;ACI67366.1;ACH70790.1;ADM15997.1;ACN12502.1;ACN10151.1;ACI68848.1	NP_001134397.1	206	220	yes	no	2	9.1126e-12	187	By matching	By matching	By MS/MS	By matching	By matching	By matching	By matching	By matching
DPEIWSDPEEFKPER	VPTWTLHRDPEIWSDP	PEEFKPERFSKENKES	R	D	P	E	R	F	0	1	0	2	0	0	4	0	0	1	0	1	0	1	3	1	0	1	0	0	0	15	1	1872.85	ACI33861.1;ABC94912.1	ACI33861.1	409	423	yes	no	3	0.00071798	97.273	By matching	By matching	By MS/MS	By MS/MS	By MS/MS	By matching	By MS/MS	By matching
DPETNQITAAIHPQLQDR	VKSVDYPRDPETNQIT	IHPQLQDRDFCLLHPG	R	D	P	D	R	D	2	1	1	2	0	3	1	0	1	2	1	0	0	0	2	0	2	0	0	0	0	18	0	2046.01	ACM08542.1;NP_001133102.1;ACI69735.1;ACH70694.1;ACI69278.1	NP_001133102.1	232	249	no	no	3	0.00028179	98.421	By matching	By matching	By matching	By matching	By matching	By MS/MS	By MS/MS	By MS/MS
DPEVMAAFQDVAQNPANIAK	PEVLNAMKDPEVMAAF	QNPANIAKYQGNPKVM	K	D	P	A	K	Y	5	0	2	2	0	2	1	0	0	1	0	1	1	1	2	0	0	0	0	2	0	20	0	2128.03	NP_001133946.1;ACI34192.1	NP_001133946.1	353	372	yes	no	2	1.1012e-40	242.18	By MS/MS	By MS/MS	By matching	By matching	By MS/MS	By MS/MS	By matching	By matching
DPFAHLPK	LASEPKTKDPFAHLPK	DPFAHLPKSAFVMDEF	K	D	P	P	K	S	1	0	0	1	0	0	0	0	1	0	1	1	0	1	2	0	0	0	0	0	0	8	0	923.486	ACM08681.1;ACH85278.1;NP_001135112.1;ACM09182.1;ACI33692.1;ACN12474.1;ACN10123.1;NP_001133235.1;ACH85371.1	ACM08681.1	286	293	yes	no	2	0.029636	64.207	By MS/MS	By matching	By matching	By matching	By matching	By matching	By matching	By matching
DPLVVELGK	VIDSSLSRDPLVVELG	PLVVELGKRTVIPGLE	R	D	P	G	K	R	0	0	0	1	0	0	1	1	0	0	2	1	0	0	1	0	0	0	0	2	0	9	0	968.554	ADM16116.1;ACI70054.1;ACI69353.1;ACI68250.1	ADM16116.1	76	84	yes	no	2	0.0016201	107.79	By MS/MS	By matching	By matching	By matching	By MS/MS	By MS/MS	By MS/MS	By matching
DPNNLFMVR	QLAQYHAKDPNNLFMV	PNNLFMVRLAQGLTHL	K	D	P	V	R	L	0	1	2	1	0	0	0	0	0	0	1	0	1	1	1	0	0	0	0	1	0	9	0	1104.54	NP_001158789.1;ACN10471.1	NP_001158789.1	745	753	yes	no	2	0.00040973	146.69	By MS/MS	By MS/MS	By MS/MS	By MS/MS	By MS/MS	By MS/MS	By MS/MS	By MS/MS
DPQALSDHLK	MILEQMQKDPQALSDH	QALSDHLKNPGIAQKI	K	D	P	L	K	N	1	0	0	2	0	1	0	0	1	0	2	1	0	0	1	1	0	0	0	0	0	10	0	1122.57	ACI32973.1;ACH70720.1	ACI32973.1	514	523	yes	no	2	0.00029114	114.71	By matching	By MS/MS	By MS/MS	By matching	By MS/MS	By matching	By matching	By matching
DPTSGSFLWPGFGDNAR	FHVNWFRKDPTSGSFL	PGFGDNARVLEWIFKR	K	D	P	A	R	V	1	1	1	2	0	0	0	3	0	0	1	0	0	2	2	2	1	1	0	0	0	17	0	1822.83	ACN11110.1;ACI33922.1;NP_001117114.1;AAZ73233.2	ACI33922.1	529	545	no	no	2	3.7119e-14	195.89	By MS/MS	By MS/MS	By MS/MS	By MS/MS	By MS/MS	By MS/MS	By MS/MS	By MS/MS
DPWYSWDHPDLR	PDRSQHERDPWYSWDH	SWDHPDLRRSWGEPIH	R	D	P	L	R	R	0	1	0	3	0	0	0	0	1	0	1	0	0	0	2	1	0	2	1	0	0	12	0	1585.69	ACI70137.1;ACI69634.1;ACI69274.1;ACI69001.1;ACI66739.1;ACI69592.1;ACI69008.1;ACI68389.1	ACI70137.1	89	100	yes	no	3	0.00097426	88.596	By matching	By matching	By matching	By MS/MS	By matching	By MS/MS	By MS/MS	By matching
DQDDIGAGDQGLMFGYATDETEECMPLTILLAHK	SVCVFEGKDQDDIGAG	LTILLAHKLNHKMKEL	K	D	Q	H	K	L	3	0	0	5	1	2	3	4	1	2	4	1	2	1	1	0	3	0	1	0	0	34	0	3753.68	NP_001158767.1;ACN12736.1;ACN10374.1	NP_001158767.1	121	154	yes	no	3;4	6.3655e-26	172.94	By MS/MS	By MS/MS	By MS/MS	By MS/MS	By MS/MS	By MS/MS	By MS/MS	By MS/MS
DQECHNYAGGHVYPGEAFR	QDGSNGKKDQECHNYA	VYPGEAFRVPVSDHSL	K	D	Q	F	R	V	2	1	1	1	1	1	2	3	2	0	0	0	0	1	1	0	0	0	2	1	0	19	0	2205.93	ACI69656.1	ACI69656.1	39	57	yes	yes	4	0.0014261	82.349	By MS/MS	By MS/MS	By matching	By MS/MS	By matching	By MS/MS	By MS/MS	By matching
DQECYNYAGGHVYPGEAFR	QDDSNGKKDQECYNYA	VYPGEAFRVPVSDHSL	K	D	Q	F	R	V	2	1	1	1	1	1	2	3	1	0	0	0	0	1	1	0	0	0	3	1	0	19	0	2231.93	ACI67534.1	ACI67534.1	39	57	yes	yes	3	0.00040848	87.388	By MS/MS	By MS/MS	By matching	By matching	By matching	By MS/MS	By matching	By matching
DQEEACQAVLDIMK	GKGVIVAKDQEEACQA	QAVLDIMKDKTFGSAG	K	D	Q	M	K	D	2	0	0	2	1	2	2	0	0	1	1	1	1	0	0	0	0	0	0	1	0	14	0	1648.74	ACN10564.1	ACN10564.1	163	176	yes	yes	2	6.088e-18	199.15	By matching	By matching	By matching	By matching	By MS/MS	By MS/MS	By matching	By MS/MS
DQEGQDVLLFIDNIFR	LTVAEYFRDQEGQDVL	LFIDNIFRFTQAGSEV	R	D	Q	F	R	F	0	1	1	3	0	2	1	1	0	2	2	0	0	2	0	0	0	0	0	1	0	16	0	1920.96	ACH85277.1	ACH85277.1	262	277	yes	yes	2;3	8.3934e-47	278.79	By MS/MS	By MS/MS	By MS/MS	By MS/MS	By MS/MS	By MS/MS	By MS/MS	By MS/MS
DQFPEVYVPTVFENYVADIEVDSK	CLLIVFSKDQFPEVYV	ADIEVDSKQVELALWD	K	D	Q	S	K	Q	1	0	1	3	0	1	3	0	0	1	0	1	0	2	2	1	1	0	2	5	0	24	0	2802.33	ACI69437.1;ACI66793.1;ACI33725.1;ADM16236.1;ACN10614.1;ACI68077.1;ACI66078.1;ACI34051.1;ACH70802.1	ACI69437.1	28	51	yes	no	3	0.0032846	66.467	By matching	By matching	By MS/MS	By matching	By matching	By matching	By matching	By matching
DQGLQLLHHPDR	KIAMLHGKDQGLQLLH	QLLHHPDRVTVEGLIH	K	D	Q	D	R	V	0	1	0	2	0	2	0	1	2	0	3	0	0	0	1	0	0	0	0	0	0	12	0	1427.73	NP_001140065.1;ACN12441.1;ACN12367.1;ACN10093.1;ACN10020.1;ACM09472.1	NP_001140065.1	13	24	yes	no	3	0.052192	46.063	By matching	By MS/MS	By matching	By matching	By matching	By matching	By matching	By matching
DQGLSIMVSGK	HLELSMAKDQGLSIMV	LSIMVSGKLDAVMKAR	K	D	Q	G	K	L	0	0	0	1	0	1	0	2	0	1	1	1	1	0	0	2	0	0	0	1	0	11	0	1133.58	NP_001167124.1;ACN10888.1	NP_001167124.1	120	130	yes	no	2	5.6809e-05	145.81	By MS/MS	By MS/MS	By matching	By matching	By MS/MS	By MS/MS	By matching	By matching
DQGSFEDFVEGLR	LQAIAKNKDQGSFEDF	EDFVEGLRVFDKEGNG	K	D	Q	L	R	V	0	1	0	2	0	1	2	2	0	0	1	0	0	2	0	1	0	0	0	1	0	13	0	1497.67	AGH92555.1;ACI69975.1;ACI67608.1;AGH92529.1;ACI70081.1;NP_001134962.1;ACI69653.1	AGH92555.1	82	94	no	no	2	2.7462e-20	226.88	By MS/MS	By MS/MS	By MS/MS	By MS/MS	By MS/MS	By MS/MS	By MS/MS	By MS/MS
DQIESILNKPGLK	IGVSNFNKDQIESILN	ILNKPGLKYKPANNQV	K	D	Q	L	K	Y	0	0	1	1	0	1	1	1	0	2	2	2	0	0	1	1	0	0	0	0	0	13	1	1453.81	ACN11078.1;ACI67446.1;ACI69471.1	ACN11078.1	165	177	yes	no	2;3	2.1163e-19	225.79	By MS/MS	By MS/MS	By MS/MS	By MS/MS	By MS/MS	By MS/MS	By MS/MS	By MS/MS
DQISEIDDAVK	PEQWNQLKDQISEIDD	SEIDDAVKAI______	K	D	Q	V	K	A	1	0	0	3	0	1	1	0	0	2	0	1	0	0	0	1	0	0	0	1	0	11	0	1231.59	NP_001134477.1;ACM09683.1;ACM09454.1;ACM08584.1;ACM08276.1;ACI67675.1;ACI67532.1;ACN12314.1;ACN09967.1	NP_001134477.1	120	130	yes	no	2	0.00022513	126.34	By MS/MS	By MS/MS	By MS/MS	By matching	By MS/MS	By matching	By matching	By matching
DQLLLGPTYGTPK	VFVSQDPKDQLLLGPT	GPTYGTPKVLARAGLT	K	D	Q	P	K	V	0	0	0	1	0	1	0	2	0	0	3	1	0	0	2	0	2	0	1	0	0	13	0	1401.75	ACN10637.1	ACN10637.1	349	361	yes	yes	2	2.6601e-07	158.31	By MS/MS	By MS/MS	By MS/MS	By MS/MS	By MS/MS	By MS/MS	By MS/MS	By MS/MS
DQPQSPGVFR	PLELVSGKDQPQSPGV	PQSPGVFRLIQDGDLW	K	D	Q	F	R	L	0	1	0	1	0	2	0	1	0	0	0	0	0	1	2	1	0	0	0	1	0	10	0	1129.55	ACI66590.1;ACI66434.1	ACI66590.1	142	151	yes	no	2	0.03077	62.633	By matching	By matching	By matching	By matching	By matching	By matching	By matching	By MS/MS
DQVANSAFVER	YYITGESKDQVANSAF	ANSAFVERVRKRGFEV	K	D	Q	E	R	V	2	1	1	1	0	1	1	0	0	0	0	0	0	1	0	1	0	0	0	2	0	11	0	1234.59	NP_001117004.1;AGT57169.1;AAD30275.1;ACH70738.1;AGT57166.1;AGT57170.1	NP_001117004.1	489	499	no	no	2	1.7133e-11	212.9	By MS/MS	By MS/MS	By MS/MS	By MS/MS	By MS/MS	By MS/MS	By MS/MS	By MS/MS
DRAEVLIK	WHGKPMPKDRAEVLIK	DRAEVLIKDLEAQIQN	K	D	R	I	K	D	1	1	0	1	0	0	1	0	0	1	1	1	0	0	0	0	0	0	0	1	0	8	1	942.55	NP_001134006.1;ACI34298.1	NP_001134006.1	268	275	yes	no	2	0.023272	96.034	By matching	By matching	By MS/MS	By matching	By matching	By MS/MS	By matching	By MS/MS
DRLEGILK	KKDAKMYRDRLEGILK	DRLEGILKQMDEVIRE	R	D	R	L	K	Q	0	1	0	1	0	0	1	1	0	1	2	1	0	0	0	0	0	0	0	0	0	8	1	942.55	NP_001133749.1;ACI33834.1	NP_001133749.1	344	351	yes	no	2	0.028834	90.601	By matching	By matching	By matching	By matching	By MS/MS	By matching	By matching	By matching
DRPFFPGLVSYMTSGPVVAMVWEGFNVVK	KEHYADLKDRPFFPGL	WEGFNVVKTGRVMLGE	K	D	R	V	K	T	1	1	1	1	0	0	1	3	0	0	1	1	2	3	3	2	1	1	1	6	0	29	1	3228.61	AGH92639.1;ADM15964.1;ACN12506.1;ACN10154.1;ACI69110.1;ACI67980.1;NP_001116998.1;AAC03020.1	AGH92639.1	57	85	yes	no	3	6.2142e-06	86.32	By matching	By MS/MS	By matching	By MS/MS	By MS/MS	By matching	By MS/MS	By MS/MS
DRVEAVNQAEGIVHDTESK	AEEDRRRKDRVEAVNQ	IVHDTESKMEEFKDQL	K	D	R	S	K	M	2	1	1	2	0	1	3	1	1	1	0	1	0	0	0	1	1	0	0	3	0	19	1	2096.01	ACN11027.1;ACN60239.1	ACN11027.1	576	594	no	no	3	7.746e-17	196.65	By MS/MS	By MS/MS	By MS/MS	By MS/MS	By MS/MS	By MS/MS	By MS/MS	By MS/MS
DSAGNIFATR	SFDVVHVKDSAGNIFA	AGNIFATRLGNIFIIG	K	D	S	T	R	L	2	1	1	1	0	0	0	1	0	1	0	0	0	1	0	1	1	0	0	0	0	10	0	1050.51	ACH85370.1;ACI69116.1;ACI67685.1;ACN12376.1;ACN10029.1;ACH85337.1;AGH92536.1;ACN12200.1;ACN09853.1;ACI69349.1	ACH85370.1	208	217	no	no	2	7.0307e-06	174.57	By MS/MS	By MS/MS	By MS/MS	By MS/MS	By MS/MS	By MS/MS	By MS/MS	By MS/MS
DSCTSLGSHLTILHSK	KMDWPSSRDSCTSLGS	HLTILHSKEQHDALEK	R	D	S	S	K	E	0	0	0	1	1	0	0	1	2	1	3	1	0	0	0	4	2	0	0	0	0	16	0	1754.86	NP_001117051.1;ACI66231.1;ACI33556.1;AAT77220.1;ACI67923.1	NP_001117051.1	143	158	no	no	2;3	3.5392e-09	172.09	By MS/MS	By matching	By MS/MS	By matching	By MS/MS	By MS/MS	By MS/MS	By MS/MS
DSDIIEEAIYYFK	GPAAKETKDSDIIEEA	EEAIYYFKANVFFKNY	K	D	S	F	K	A	1	0	0	2	0	0	2	0	0	3	0	1	0	1	0	1	0	0	2	0	0	13	0	1604.76	ACN12752.1;ACN12356.1;ACN10389.1;ACN10009.1;ACM09803.1;ACM08565.1	ACN12752.1	38	50	yes	no	2	2.1972e-05	136.7	By MS/MS	By MS/MS	By matching	By matching	By matching	By MS/MS	By MS/MS	By matching
DSELLNLR	WAEAGYLKDSELLNLR	DSELLNLRKVDSILEG	K	D	S	L	R	K	0	1	1	1	0	0	1	0	0	0	3	0	0	0	0	1	0	0	0	0	0	8	0	958.508	ACN11355.1	ACN11355.1	94	101	yes	yes	2	0.00082438	122.52	By MS/MS	By matching	By matching	By matching	By MS/MS	By matching	By matching	By matching
DSGVDIATGNR	QHRGLTYKDSGVDIAT	VDIATGNRLVDMIKPF	K	D	S	N	R	L	1	1	1	2	0	0	0	2	0	1	0	0	0	0	0	1	1	0	0	1	0	11	0	1103.52	ACN10564.1	ACN10564.1	439	449	yes	yes	2	0.00031202	120.86	By MS/MS	By MS/MS	By MS/MS	By MS/MS	By MS/MS	By MS/MS	By MS/MS	By MS/MS
DSHGVAQVR	SQIGVILRDSHGVAQV	SHGVAQVRFVTGNKIL	R	D	S	V	R	F	1	1	0	1	0	1	0	1	1	0	0	0	0	0	0	1	0	0	0	2	0	9	0	967.484	NP_001133064.1;ACN12407.1;ACN10060.1;ACH70620.1;ACN12219.1;ACN09872.1;ACN12245.1;ACN09898.1;ACI68872.1;ACI68760.1	NP_001133064.1	56	64	yes	no	2	0.011491	77.192	By matching	By MS/MS	By MS/MS	By matching	By MS/MS	By matching	By matching	By matching
DSIACVVLTFK	IFGPIWNRDSIACVVL	ACVVLTFKEPFGTQGR	R	D	S	F	K	E	1	0	0	1	1	0	0	0	0	1	1	1	0	1	0	1	1	0	0	2	0	11	0	1251.65	NP_001135196.1;ACI33164.1	NP_001135196.1	232	242	yes	no	2	2.2157e-05	151.98	By MS/MS	By matching	By matching	By MS/MS	By MS/MS	By matching	By MS/MS	By MS/MS
DSLECEIVSAK	GCHVYLSKDSLECEIV	ECEIVSAKSSEMNVLV	K	D	S	A	K	S	1	0	0	1	1	0	2	0	0	1	1	1	0	0	0	2	0	0	0	1	0	11	0	1249.59	NP_001133556.1;ACI33472.1	NP_001133556.1	415	425	yes	no	2	3.6115e-05	149.49	By MS/MS	By MS/MS	By MS/MS	By MS/MS	By MS/MS	By MS/MS	By MS/MS	By matching
DSLELPMTPEELLSETR	MEASTIIRDSLELPMT	EELLSETRKIQEKIFP	R	D	S	T	R	K	0	1	0	1	0	0	4	0	0	0	4	0	1	0	2	2	2	0	0	0	0	17	0	1958.95	NP_001134479.1;ACI67690.1;ACI68753.1	NP_001134479.1	65	81	yes	no	2	5.8741e-09	163.8	By MS/MS	By MS/MS	By MS/MS	By MS/MS	By MS/MS	By MS/MS	By MS/MS	By MS/MS
DSLHNEGDWTMDIR	SKKCSVIRDSLHNEGD	GDWTMDIRTKSQGGEP	R	D	S	I	R	T	0	1	1	3	0	0	1	1	1	1	1	0	1	0	0	1	1	1	0	0	0	14	0	1687.73	ACI66182.1;ACM08352.1	ACI66182.1	75	88	yes	no	3	0.025663	58.079	By matching	By MS/MS	By MS/MS	By matching	By MS/MS	By MS/MS	By MS/MS	By matching
DSNSLLGALSPLNAAAAAAAAAGR	MAAAFQGKDSNSLLGA	AAAAAAGRVALSGHSG	K	D	S	G	R	V	10	1	2	1	0	0	0	2	0	0	4	0	0	0	1	3	0	0	0	0	0	24	0	2152.12	NP_001133504.1;ACI33363.1	NP_001133504.1	293	316	yes	no	2	0.0035714	79.426	By matching	By matching	By matching	By matching	By matching	By matching	By matching	By MS/MS
DSNYHLLMSVQESLER	RLTFKYERDSNYHLLM	SVQESLERKFGKQGGP	R	D	S	E	R	K	0	1	1	1	0	1	2	0	1	0	3	0	1	0	0	3	0	0	1	1	0	16	0	1919.9	ACI33099.1;NP_001117025.1;CAD58715.1;CAD58716.1;ACN58706.1;ACN10920.1;NP_001117108.1;CAD58714.1;ACI32916.1;CAD89353.1	NP_001117108.1	442	457	no	no	2;3	3.7927e-34	249.54	By MS/MS	By MS/MS	By MS/MS	By MS/MS	By MS/MS	By MS/MS	By MS/MS	By MS/MS
DSQICELK	ICEKLKKKDSQICELK	DSQICELKYDKQVDLS	K	D	S	L	K	Y	0	0	0	1	1	1	1	0	0	1	1	1	0	0	0	1	0	0	0	0	0	8	0	991.464	ACI69956.1	ACI69956.1	112	119	yes	yes	2	0.00016724	153.24	By MS/MS	By MS/MS	By MS/MS	By MS/MS	By MS/MS	By MS/MS	By matching	By matching
DSQYDVVLLDPGLPVGVLVAHK	KALMQSLRDSQYDVVL	VGVLVAHKLGLPTVFN	R	D	S	H	K	L	1	0	0	3	0	1	0	2	1	0	4	1	0	0	2	1	0	0	1	5	0	22	0	2333.26	NP_001133343.1;ACI33061.1	NP_001133343.1	151	172	yes	no	3	2.0631e-05	100.02	By matching	By matching	By matching	By matching	By MS/MS	By matching	By MS/MS	By matching
DSSGHVGFIFK	QRTVTMHKDSSGHVGF	GHVGFIFKSGNITSLV	K	D	S	F	K	S	0	0	0	1	0	0	0	2	1	1	0	1	0	2	0	2	0	0	0	1	0	11	0	1192.59	ACN10699.1;ACI33018.1	ACN10699.1	207	217	yes	no	2	0.00075931	106.62	By MS/MS	By matching	By matching	By matching	By matching	By matching	By matching	By matching
DSTLIMQLLR	TLNEDSYKDSTLIMQL	TLIMQLLRDNLTLWTS	K	D	S	L	R	D	0	1	0	1	0	1	0	0	0	1	3	0	1	0	0	1	1	0	0	0	0	10	0	1188.65	NP_001133693.1;ACI33711.1;ACI34249.1;NP_001134815.1;ACN12493.1;ACN10142.1;ACI69013.1;NP_001133672.1;ADM15894.1;ACI67724.1;ACI33675.1;ACH70793.1;ACI68704.1;NP_001167129.1;ACN10900.1;NP_001133488.1;ACI33335.1;ACI33769.1;ACH70649.1;NP_001135087.1;ACN10949.1;ACI70157.1;ACI69428.1;ACI68864.1;ACI69139.1	ACI68704.1	213	222	no	no	2	5.0692e-14	222.28	By MS/MS	By MS/MS	By MS/MS	By MS/MS	By MS/MS	By MS/MS	By MS/MS	By MS/MS
DSTLSSLTGQLDYSGFEK	KAITSFERDSTLSSLT	LDYSGFEKADMVIEAV	R	D	S	E	K	A	0	0	0	2	0	1	1	2	0	0	3	1	0	1	0	4	2	0	1	0	0	18	0	1946.91	ACN58629.1	ACN58629.1	418	435	yes	yes	2	1.3833e-37	248.7	By matching	By matching	By matching	By matching	By matching	By matching	By matching	By MS/MS
DSVVAGFQWAVK	VQYLNEIKDSVVAGFQ	AGFQWAVKEGALCEEN	K	D	S	V	K	E	2	0	0	1	0	1	0	1	0	0	0	1	0	1	0	1	0	1	0	3	0	12	0	1305.67	ACN11358.1;ACN58670.1;NP_001133466.1;ACI33293.1;ACN10751.1;ACN11125.1;ACN58590.1	NP_001133466.1	677	688	no	no	2	2.1517e-07	172.13	By MS/MS	By MS/MS	By MS/MS	By MS/MS	By MS/MS	By MS/MS	By MS/MS	By matching
DSYDSYAAHE	DRSGGSYRDSYDSYAA	YDSYAAHE________	R	D	S	H	E	-	2	0	0	2	0	0	1	0	1	0	0	0	0	0	0	2	0	0	2	0	0	10	0	1156.43	ADM16300.1	ADM16300.1	112	121	yes	yes	2	0.0038674	86.882	By matching	By matching	By MS/MS	By matching	By matching	By matching	By matching	By matching
DSYDSYATHE	GRSGGSYRDSYDSYAT	YDSYATHE________	R	D	S	H	E	-	1	0	0	2	0	0	1	0	1	0	0	0	0	0	0	2	1	0	2	0	0	10	0	1186.44	ACH70922.1	ACH70922.1	194	203	yes	yes	2	4.6545e-05	161.27	By matching	By matching	By MS/MS	By matching	By MS/MS	By matching	By matching	By matching
DSYLILETLPTEYDSR	GDLVGVNKDSYLILET	LPTEYDSRVKAMEVDE	K	D	S	S	R	V	0	1	0	2	0	0	2	0	0	1	3	0	0	0	1	2	2	0	2	0	0	16	0	1913.93	NP_001134065.1;AGH92560.1;ACI66100.1	NP_001134065.1	144	159	yes	no	2	7.4122e-19	202.32	By MS/MS	By MS/MS	By MS/MS	By MS/MS	By MS/MS	By MS/MS	By MS/MS	By MS/MS
DSYQTIHFFGDK	YCLGLVEKDSYQTIHF	TIHFFGDKTKPGGNDH	K	D	S	D	K	T	0	0	0	2	0	1	0	1	1	1	0	1	0	2	0	1	1	0	1	0	0	12	0	1456.66	NP_001135150.1;ACH70642.1	NP_001135150.1	201	212	yes	no	2	0.00013615	113.95	By matching	By matching	By matching	By matching	By matching	By matching	By matching	By matching
DSYVGDEAQSK	VMVGMGQKDSYVGDEA	VGDEAQSKRGILTLKY	K	D	S	S	K	R	1	0	0	2	0	1	1	1	0	0	0	1	0	0	0	2	0	0	1	1	0	11	0	1197.52	O42161.1;NP_001116997.1;ACN11317.1;ACI33371.1;AAB65430.1;NP_001134991.1;ACI69763.1;NP_001133115.1;NP_001117011.1;ACH70896.1;ACH70895.1;ACH70894.1;ACH70714.1;AAG25672.1	O42161.1	51	61	no	no	2	3.7507e-16	223.77	By matching	By MS/MS	By MS/MS	By MS/MS	By MS/MS	By matching	By matching	By MS/MS
DTACQEGFR	WLLEKVGRDTACQEGF	TACQEGFRTFQQFLDN	R	D	T	F	R	T	1	1	0	1	1	1	1	1	0	0	0	0	0	1	0	0	1	0	0	0	0	9	0	1082.45	NP_001167350.1;ACN11445.1	NP_001167350.1	230	238	yes	no	2	1.9039e-14	240.13	By matching	By matching	By MS/MS	By matching	By matching	By matching	By matching	By matching
DTALSFLSQ	AAELVEERDTALSFLS	TALSFLSQ________	R	D	T	S	Q	-	1	0	0	1	0	1	0	0	0	0	2	0	0	1	0	2	1	0	0	0	0	9	0	980.481	ACN12543.1;ACN10189.1;ACN12783.1;ACN10417.1;ACI69505.1	ACN12783.1	325	333	no	no	1;2	0.00074773	134.25	By MS/MS	By matching	By matching	By matching	By MS/MS	By MS/MS	By MS/MS	By matching
DTALTQMESACLSIHEILK	PLLPDMNRDTALTQME	LSIHEILKVVSDSQTW	R	D	T	L	K	V	2	0	0	1	1	1	2	0	1	2	3	1	1	0	0	2	2	0	0	0	0	19	0	2159.06	NP_001139866.1;ACM09172.1;ACM08410.1	NP_001139866.1	125	143	no	no	3	0.027707	45.618	By matching	By matching	By matching	By MS/MS	By matching	By matching	By MS/MS	By matching
DTAPLILTELLMDENIR	EAERLDVKDTAPLILT	LLMDENIRDQIKKYKR	K	D	T	I	R	D	1	1	1	2	0	0	2	0	0	2	4	0	1	0	1	0	2	0	0	0	0	17	0	1956.02	ACI34032.1;ACN10882.1	ACI34032.1	265	281	yes	no	2	1.8547e-13	186.85	By MS/MS	By MS/MS	By MS/MS	By MS/MS	By MS/MS	By MS/MS	By MS/MS	By MS/MS
DTATAAINAQEAEANK	SLTIPEPKDTATAAIN	AQEAEANKAAVAYVEA	K	D	T	N	K	A	6	0	2	1	0	1	2	0	0	1	0	1	0	0	0	0	2	0	0	0	0	16	0	1616.76	ACN12181.1;ACN09834.1	ACN12181.1	84	99	yes	no	2	2.0522e-43	268.13	By MS/MS	By MS/MS	By MS/MS	By MS/MS	By MS/MS	By MS/MS	By MS/MS	By matching
DTATAAINTQEAEANK	SLTIPEPKDTATAAIN	TQEAEANKAAVAYVEA	K	D	T	N	K	A	5	0	2	1	0	1	2	0	0	1	0	1	0	0	0	0	3	0	0	0	0	16	0	1646.77	NP_001133159.1;ACI69093.1;ACH70827.1	NP_001133159.1	84	99	yes	no	2	1.0122e-55	307.07	By MS/MS	By MS/MS	By MS/MS	By MS/MS	By MS/MS	By MS/MS	By MS/MS	By MS/MS
DTAVMQLR	QLDFNSSKDTAVMQLR	DTAVMQLRSGSKFPVF	K	D	T	L	R	S	1	1	0	1	0	1	0	0	0	0	1	0	1	0	0	0	1	0	0	1	0	8	0	932.475	NP_001133825.1;ACI33965.1	NP_001133825.1	351	358	yes	no	2	0.0039931	90.709	By matching	By matching	By matching	By MS/MS	By matching	By MS/MS	By matching	By matching
DTAYLAELETLDNGKPYAVSYSVDVPMVVK	RLADAIERDTAYLAEL	VDVPMVVKCLRYYAGW	R	D	T	V	K	C	3	0	1	3	0	0	2	1	0	0	3	2	1	0	2	2	2	0	3	5	0	30	1	3286.63	ACI33614.1	ACI33614.1	116	145	yes	yes	3	4.9506e-05	70.112	By MS/MS	By MS/MS	By matching	By matching	By MS/MS	By MS/MS	By matching	By matching
DTDAAVGDNIGYITFVLFPR	REPPLELKDTDAAVGD	ITFVLFPRHTNANARD	K	D	T	P	R	H	2	1	1	3	0	0	0	2	0	2	1	0	0	2	1	0	2	0	1	2	0	20	0	2183.09	ACH70809.1	ACH70809.1	211	230	yes	yes	2;3	4.0529e-05	105.99	By MS/MS	By MS/MS	By MS/MS	By MS/MS	By MS/MS	By MS/MS	By MS/MS	By MS/MS
DTDGTHLLPK	TAGILKFRDTDGTHLL	DGTHLLPKIRDAAGQK	R	D	T	P	K	I	0	0	0	2	0	0	0	1	1	0	2	1	0	0	1	0	2	0	0	0	0	10	0	1095.56	ACN10812.1	ACN10812.1	244	253	yes	yes	2	0.00021475	142.98	By MS/MS	By MS/MS	By MS/MS	By MS/MS	By MS/MS	By MS/MS	By MS/MS	By MS/MS
DTEFYNYHIPEGTMVLPLLSSVLADPK	SVPHKVIRDTEFYNYH	SSVLADPKLFKNPDEF	R	D	T	P	K	L	1	0	1	2	0	0	2	1	1	1	4	1	1	1	3	2	2	0	2	2	0	27	0	3048.52	ACN11468.1;ACI33595.1	ACN11468.1	379	405	yes	no	3	1.1705e-09	113.42	By matching	By MS/MS	By MS/MS	By MS/MS	By MS/MS	By MS/MS	By MS/MS	By MS/MS
DTELSEEELCLLMGQFVIAAQQGNHQAQGWPNTAYGTTK	PQLQAKFRDTELSEEE	NTAYGTTKIGVTVLSR	R	D	T	T	K	I	4	0	2	1	1	5	4	4	1	1	4	1	1	1	1	1	4	1	1	1	0	39	0	4335.02	ACI67769.1;ACI34069.1;ACI69439.1;ADM16272.1;ACI67351.1	ACI67769.1	159	197	no	no	3	0.00013652	59.352	By MS/MS	By MS/MS	By matching	By matching	By MS/MS	By matching	By MS/MS	By MS/MS
DTFNHLTTWLEDAR	LVYDITRRDTFNHLTT	TTWLEDARQHSNSNMV	R	D	T	A	R	Q	1	1	1	2	0	0	1	0	1	0	2	0	0	1	0	0	3	1	0	0	0	14	0	1717.81	NP_001133505.1;ACN12789.1;ACN11420.1;ACN10423.1;ACI33367.1;ACH70764.1	NP_001133505.1	92	105	yes	no	2	0.0010312	90.476	By matching	By matching	By matching	By matching	By matching	By MS/MS	By MS/MS	By MS/MS
DTGANLAICQWGFDDEANHLLLQNELPAIR	LEMIKQIKDTGANLAI	QNELPAIRWVGGPEIE	K	D	T	I	R	W	4	1	3	3	1	2	2	2	1	2	5	0	0	1	1	0	1	1	0	0	0	30	0	3393.64	NP_001167310.1;ACN11333.1	NP_001167310.1	294	323	yes	no	3	7.5582e-24	164.83	By MS/MS	By MS/MS	By MS/MS	By MS/MS	By MS/MS	By MS/MS	By matching	By MS/MS
DTGKAPVEAEVAIHR	________________	EAEVAIHRIRITLTSR	K	D	T	H	R	I	3	1	0	1	0	0	2	1	1	1	0	1	0	0	1	0	1	0	0	2	0	15	1	1591.83	NP_001134315.1;ACN12392.1;ACN12233.1;ACN10045.1;ACN09886.1;ACI67034.1;ACH70883.1	NP_001134315.1	5	19	yes	no	3	4.1199e-06	146.84	By matching	By MS/MS	By MS/MS	By MS/MS	By MS/MS	By MS/MS	By matching	By MS/MS
DTHDDLSDLNAMQQESLNEWETQFTQK	CLEKEALKDTHDDLSD	WETQFTQKYDYVGKLL	K	D	T	Q	K	Y	1	0	2	4	0	4	3	0	1	0	3	1	1	1	0	2	3	1	0	0	0	27	0	3222.4	NP_001139831.1;ACM08229.1	NP_001139831.1	126	152	yes	no	3	9.941e-20	167.87	By MS/MS	By MS/MS	By matching	By matching	By MS/MS	By MS/MS	By matching	By matching
DTILHIDEK	SFDVVYSRDTILHIDE	TILHIDEKLALFKRFH	R	D	T	E	K	L	0	0	0	2	0	0	1	0	1	2	1	1	0	0	0	0	1	0	0	0	0	9	0	1082.56	NP_001167350.1;ACN11445.1	NP_001167350.1	360	368	yes	no	2	0.015839	71.501	By matching	By matching	By matching	By MS/MS	By matching	By matching	By MS/MS	By MS/MS
DTIPIPDGGAK	VIVTKNQRDTIPIPDG	PIPDGGAKSQLGSWMS	R	D	T	A	K	S	1	0	0	2	0	0	0	2	0	2	0	1	0	0	2	0	1	0	0	0	0	11	0	1082.56	ACI33922.1;NP_001117114.1;AAZ73233.2	ACI33922.1	108	118	yes	no	2	0.010236	77.744	By MS/MS	By MS/MS	By MS/MS	By matching	By MS/MS	By matching	By matching	By matching
DTIPIPGEGAK	VIVTKNQRDTIPIPGE	PIPGEGAKSQLGSWMS	R	D	T	A	K	S	1	0	0	1	0	0	1	2	0	2	0	1	0	0	2	0	1	0	0	0	0	11	0	1096.58	ACN11110.1	ACN11110.1	108	118	yes	yes	2	0.0021912	88.596	By MS/MS	By MS/MS	By MS/MS	By matching	By MS/MS	By MS/MS	By MS/MS	By MS/MS
DTIVPDIQK	PAGWKPGRDTIVPDIQ	TIVPDIQKSKEFFSKQ	R	D	T	Q	K	S	0	0	0	2	0	1	0	0	0	2	0	1	0	0	1	0	1	0	0	1	0	9	0	1027.56	NP_001134295.1;ACI66947.1	NP_001134295.1	181	189	yes	no	2	0.0088197	80.688	By MS/MS	By MS/MS	By MS/MS	By matching	By MS/MS	By MS/MS	By matching	By matching
DTLVNTVGNR	IVAPFWFKDTLVNTVG	LVNTVGNRAAELSLEL	K	D	T	N	R	A	0	1	2	1	0	0	0	1	0	0	1	0	0	0	0	0	2	0	0	2	0	10	0	1087.56	ACN11185.1	ACN11185.1	192	201	yes	yes	2	4.0523e-08	197.79	By MS/MS	By MS/MS	By MS/MS	By MS/MS	By MS/MS	By MS/MS	By MS/MS	By MS/MS
DTNGSQFFITTIQTPWLDGK	LSMANAGKDTNGSQFF	QTPWLDGKHVVFGKIL	K	D	T	G	K	H	0	0	1	2	0	2	0	2	0	2	1	1	0	2	1	1	4	1	0	0	0	20	0	2268.11	AGH92516.1;ACI69864.1;ACI67931.1;ACI69995.1;ACI68543.1;NP_001134342.1;ACI67125.1	AGH92516.1	146	165	yes	no	2	1.0633e-40	242.94	By MS/MS	By MS/MS	By MS/MS	By MS/MS	By MS/MS	By MS/MS	By MS/MS	By MS/MS
DTPDEPYAFQAR	PQSQPDQKDTPDEPYA	EPYAFQAREFLRKMLI	K	D	T	A	R	E	2	1	0	2	0	1	1	0	0	0	0	0	0	1	2	0	1	0	1	0	0	12	0	1408.63	ACN60284.1	ACN60284.1	9	20	yes	yes	2	1.0759e-06	155.47	By MS/MS	By MS/MS	By MS/MS	By MS/MS	By MS/MS	By MS/MS	By MS/MS	By MS/MS
DTPGFIVNR	GKTPVSCKDTPGFIVN	TPGFIVNRLLVPYMME	K	D	T	N	R	L	0	1	1	1	0	0	0	1	0	1	0	0	0	1	1	0	1	0	0	1	0	9	0	1017.52	ACI67321.1;ACI68972.1;ACI70100.1;ACI68654.1;ACI66352.1;ADM16091.1;ACI68190.1	ACI67321.1	208	216	yes	no	2	0.0089983	80.455	By MS/MS	By MS/MS	By MS/MS	By MS/MS	By matching	By matching	By MS/MS	By MS/MS
DTPLDIFSYLNEIGGR	HIKEGKSKDTPLDIFS	YLNEIGGRHGVGRIDI	K	D	T	G	R	H	0	1	1	2	0	0	1	2	0	2	2	0	0	1	1	1	1	0	1	0	0	16	0	1808.89	NP_001134536.1;ACI67919.1	NP_001134536.1	244	259	yes	no	2	7.287e-06	138.01	By matching	By matching	By matching	By matching	By matching	By matching	By matching	By matching
DTSVVVEMDNSR	RELQGQIKDTSVVVEM	VVEMDNSRNLDMDSIV	K	D	T	S	R	N	0	1	1	2	0	0	1	0	0	0	0	0	1	0	0	2	1	0	0	3	0	12	0	1350.61	NP_001133687.1;ACN11271.1;ACI33701.1	NP_001133687.1	275	286	yes	no	2	1.0184e-12	212.68	By MS/MS	By MS/MS	By MS/MS	By MS/MS	By MS/MS	By MS/MS	By MS/MS	By MS/MS
DTTASAVAVGLK	ITTDKTSKDTTASAVA	SAVAVGLKQGKVIIVV	K	D	T	L	K	Q	3	0	0	1	0	0	0	1	0	0	1	1	0	0	0	1	2	0	0	2	0	12	0	1131.61	ACN58629.1	ACN58629.1	515	526	yes	yes	2	3.9196e-09	187.31	By MS/MS	By MS/MS	By MS/MS	By MS/MS	By matching	By MS/MS	By MS/MS	By MS/MS
DTTGENIAESLVNEGLATVR	YGMVYLGRDTTGENIA	NEGLATVRREGIRGNN	R	D	T	V	R	R	2	1	2	1	0	0	3	2	0	1	2	0	0	0	0	1	3	0	0	2	0	20	0	2088.03	ACN60284.1	ACN60284.1	54	73	yes	yes	2;3	8.1168e-96	340.31	By MS/MS	By MS/MS	By MS/MS	By MS/MS	By MS/MS	By MS/MS	By MS/MS	By MS/MS
DTVVVVDNTFMSAYFQR	DVVHQHNRDTVVVVDN	FMSAYFQRPLALGADI	R	D	T	Q	R	P	1	1	1	2	0	1	0	0	0	0	0	0	1	2	0	1	2	0	1	4	0	17	0	1990.95	NP_001133465.1;ACN10804.1;ACI33287.1	NP_001133465.1	185	201	yes	no	2	1.5597e-48	265.43	By matching	By matching	By matching	By matching	By MS/MS	By matching	By matching	By matching
DVADLFQSAVCSSETLVEK	TPPEDCERDVADLFQS	SSETLVEKNDLKMCCE	R	D	V	E	K	N	2	0	0	2	1	1	2	0	0	0	2	1	0	1	0	3	1	0	0	3	0	19	0	2096.99	P21848.1;NP_001117137.1;CAA36643.1;Q03156.1;NP_001117164.1;CAA43187.1	Q03156.1	83	101	no	no	2;3	8.5118e-53	279.5	By MS/MS	By MS/MS	By MS/MS	By MS/MS	By MS/MS	By MS/MS	By MS/MS	By MS/MS
DVAGDASESALLK	NNVPILKRDVAGDASE	ASESALLKCIELCCGS	R	D	V	L	K	C	3	0	0	2	0	0	1	1	0	0	2	1	0	0	0	2	0	0	0	1	0	13	0	1274.64	ACN10460.1;AAV97939.1;AAV97938.1;AAV97941.1;AAV97940.1	ACN10460.1	451	463	no	no	2	0.00019145	113.25	By matching	By matching	By MS/MS	By matching	By matching	By matching	By MS/MS	By MS/MS
DVAPFSEDALK	AIEYGPFRDVAPFSED	PFSEDALKVHYENNTP	R	D	V	L	K	V	2	0	0	2	0	0	1	0	0	0	1	1	0	1	1	1	0	0	0	1	0	11	0	1190.58	ACN11098.1	ACN11098.1	200	210	no	no	2	0.047859	61.344	By MS/MS	By matching	By MS/MS	By matching	By matching	By MS/MS	By matching	By MS/MS
DVAVLLTQVSNLVYHR	HDTLADPKDVAVLLTQ	VSNLVYHRHIKHWEHL	K	D	V	H	R	H	1	1	1	1	0	1	0	0	1	0	3	0	0	0	0	1	1	0	1	4	0	16	0	1826.01	NP_001133331.1;ACI33043.1	NP_001133331.1	349	364	yes	no	2;3	8.6025e-09	166.3	By MS/MS	By MS/MS	By MS/MS	By matching	By MS/MS	By matching	By MS/MS	By MS/MS
DVCLYPR	LLNRHHIRDVCLYPRF	RDVCLYPRFIQRCRP_	R	D	V	P	R	F	0	1	0	1	1	0	0	0	0	0	1	0	0	0	1	0	0	0	1	1	0	7	0	921.438	NP_001133698.1;ACI33721.1	NP_001133698.1	546	552	yes	no	2	0.0049625	94.262	By MS/MS	By MS/MS	By matching	By MS/MS	By matching	By MS/MS	By matching	By matching
DVDEAYMNK	NDFVLIKKDVDEAYMN	VDEAYMNKVELEAKLE	K	D	V	N	K	V	1	0	1	2	0	0	1	0	0	0	0	1	1	0	0	0	0	0	1	1	0	9	0	1083.45	NP_001133687.1;ACN11271.1;ACI33701.1;CON__H-INV:HIT000292931;CON__P05787	NP_001133687.1	233	241	no	no	2	0.00019617	155.42	By MS/MS	By matching	By MS/MS	By matching	By MS/MS	By matching	By matching	By matching
DVDEAYMNKVELEAK	NDFVLIKKDVDEAYMN	NKVELEAKLESLTDEI	K	D	V	A	K	L	2	0	1	2	0	0	3	0	0	0	1	2	1	0	0	0	0	0	1	2	0	15	1	1752.82	NP_001133687.1;ACN11271.1;ACI33701.1	NP_001133687.1	233	247	yes	no	3	0.0058181	76.868	By matching	By matching	By MS/MS	By matching	By matching	By matching	By matching	By matching
DVDFELIK	TVADMNRKDVDFELIK	DVDFELIKMEGKVGGK	K	D	V	I	K	M	0	0	0	2	0	0	1	0	0	1	1	1	0	1	0	0	0	0	0	1	0	8	0	977.507	NP_001167310.1;ACN11333.1	NP_001167310.1	203	210	yes	no	2	0.034507	62.546	By matching	By matching	By matching	By matching	By MS/MS	By matching	By matching	By matching
DVDGFLVGGAALKPEFVDIINAK	CKELGGMKDVDGFLVG	FVDIINAKQ_______	K	D	V	A	K	Q	3	0	1	3	0	0	1	3	0	2	2	2	0	2	1	0	0	0	0	3	0	23	1	2387.27	NP_001133174.1;ACM09835.1;ACM09737.1;ACH70887.1;ACI70188.1	NP_001133174.1	224	246	yes	no	2;3;4	2.9933e-35	237.09	By MS/MS	By MS/MS	By MS/MS	By MS/MS	By MS/MS	By MS/MS	By MS/MS	By MS/MS
DVFISAAER	EKAVQLVKDVFISAAE	VFISAAERDVYTGDAL	K	D	V	E	R	D	2	1	0	1	0	0	1	0	0	1	0	0	0	1	0	1	0	0	0	1	0	9	0	1006.51	ACI67092.1;ACI68289.1	ACI68289.1	201	209	no	no	2	0.0030247	89.827	By MS/MS	By matching	By matching	By matching	By MS/MS	By matching	By matching	By matching
DVFMLQDHELYAAFSQCK	FKMFMAYKDVFMLQDH	YAAFSQCKEIGAIAQV	K	D	V	C	K	E	2	0	0	2	1	2	1	0	1	0	2	1	1	2	0	1	0	0	1	1	0	18	0	2200.99	NP_001167410.1;ACN11006.1	NP_001167410.1	162	179	yes	no	3	0.00025688	99.711	By MS/MS	By MS/MS	By MS/MS	By matching	By MS/MS	By MS/MS	By matching	By MS/MS
DVGVHWVILGHSER	EISPAMIKDVGVHWVI	VILGHSERRWVFGETD	K	D	V	E	R	R	0	1	0	1	0	0	1	2	2	1	1	0	0	0	0	1	0	1	0	3	0	14	0	1602.83	NP_001133174.1;ACM09835.1;ACM09737.1;ACH70887.1;ACI70188.1	NP_001133174.1	84	97	yes	no	2;3	2.8788e-08	164.93	By MS/MS	By MS/MS	By MS/MS	By MS/MS	By MS/MS	By MS/MS	By MS/MS	By MS/MS
DVGWAPSIGLPTSTIASCSQDGR	EAHSDWVRDVGWAPSI	ASCSQDGRVFIWTCDD	R	D	V	G	R	V	2	1	0	2	1	1	0	3	0	2	1	0	0	0	2	4	2	1	0	1	0	23	0	2374.12	NP_001134240.1;ACI66750.1	NP_001134240.1	216	238	yes	no	2	1.1917e-07	125.04	By matching	By matching	By matching	By matching	By matching	By matching	By MS/MS	By matching
DVIEEYFK	YGKESQAKDVIEEYFK	DVIEEYFKAKK_____	K	D	V	F	K	A	0	0	0	1	0	0	2	0	0	1	0	1	0	1	0	0	0	0	1	1	0	8	0	1041.5	ADM16249.1;ADM16007.1;ACN12369.1;ACN12195.1;ACN10022.1;ACN09848.1;ACI68255.1;ACI67162.1;ACI66971.1;ACH70842.1	ADM16249.1	122	129	yes	no	2	0.002073	104.2	By MS/MS	By MS/MS	By MS/MS	By MS/MS	By MS/MS	By MS/MS	By MS/MS	By MS/MS
DVLALLDNYLIANATQAESK	AELQDICKDVLALLDN	NATQAESKVFYLKMKG	K	D	V	S	K	V	4	0	2	2	0	1	1	0	0	1	4	1	0	0	0	1	1	0	1	1	0	20	0	2161.13	ACI68704.1	ACI68704.1	96	115	yes	yes	2;3	5.7645e-41	252.66	By MS/MS	By MS/MS	By MS/MS	By MS/MS	By MS/MS	By MS/MS	By MS/MS	By MS/MS
DVLEIGALWAILK	KQQLILARDVLEIGAL	GALWAILKKDIPSFER	R	D	V	L	K	K	2	0	0	1	0	0	1	1	0	2	3	1	0	0	0	0	0	1	0	1	0	13	0	1439.84	NP_001134503.1;ACN12748.1;ACN10386.1;ACI67782.1	NP_001134503.1	63	75	yes	no	2	1.795e-07	164.11	By MS/MS	By MS/MS	By matching	By MS/MS	By MS/MS	By MS/MS	By MS/MS	By MS/MS
DVLGMDHDEMAQAFEDWNK	CEAYHLMKDVLGMDHD	QAFEDWNKTELDSFLI	K	D	V	N	K	T	2	0	1	4	0	1	2	1	1	0	1	1	2	1	0	0	0	1	0	1	0	19	0	2249.94	ACN10812.1	ACN10812.1	207	225	yes	yes	2;3	2.4651e-41	261.06	By MS/MS	By MS/MS	By MS/MS	By MS/MS	By MS/MS	By MS/MS	By MS/MS	By MS/MS
DVLGMDHDEMAQAFEDWNKTELDSFLIEITAGILK	CEAYHLMKDVLGMDHD	EITAGILKFRDTDGTH	K	D	V	L	K	F	3	0	1	5	0	1	4	2	1	3	4	2	2	2	0	1	2	1	0	1	0	35	1	3993.9	ACN10812.1	ACN10812.1	207	241	yes	yes	3;4	7.1924e-10	99.907	By MS/MS	By MS/MS	By MS/MS	By MS/MS	By MS/MS	By MS/MS	By MS/MS	By MS/MS
DVLSVAFSADNR	RRFVGHTKDVLSVAFS	VAFSADNRQIVSGSRD	K	D	V	N	R	Q	2	1	1	2	0	0	0	0	0	0	1	0	0	1	0	2	0	0	0	2	0	12	0	1292.64	ACN11311.1;ACN11018.1;ACI68732.1;ACI67449.1;ACH70647.1;ACN12499.1;ACN10148.1	ACN11311.1	107	118	yes	no	2	4.0907e-24	242.97	By MS/MS	By MS/MS	By MS/MS	By MS/MS	By MS/MS	By MS/MS	By MS/MS	By MS/MS
DVMAFNSDGADSPLPFPIIADDK	ADHLAWSKDVMAFNSD	FPIIADDKRELSVQLG	K	D	V	D	K	R	3	0	1	5	0	0	0	1	0	2	1	1	1	2	3	2	0	0	0	1	0	23	0	2434.14	ACI67571.1	ACI67571.1	84	106	yes	yes	2;3	4.4924e-46	251.56	By MS/MS	By MS/MS	By MS/MS	By MS/MS	By MS/MS	By MS/MS	By MS/MS	By MS/MS
DVMAFNSDGADSPLPFPIIADDKR	ADHLAWSKDVMAFNSD	PIIADDKRELSVQLGM	K	D	V	K	R	E	3	1	1	5	0	0	0	1	0	2	1	1	1	2	3	2	0	0	0	1	0	24	1	2590.24	ACI67571.1	ACI67571.1	84	107	yes	yes	2;3	1.5733e-20	179.7	By MS/MS	By MS/MS	By MS/MS	By MS/MS	By MS/MS	By MS/MS	By MS/MS	By MS/MS
DVMEDAVENKLETK	SRWTPVIKDVMEDAVE	VENKLETKEWPHQSEC	K	D	V	T	K	E	1	0	1	2	0	0	3	0	0	0	1	2	1	0	0	0	1	0	0	2	0	14	1	1619.77	ACN58648.1	ACN58648.1	475	488	yes	yes	2	0.024263	101.38	By matching	By matching	By MS/MS	By MS/MS	By matching	By matching	By matching	By MS/MS
DVMQNHLLQMLSLVAMEK	FDDFGIIRDVMQNHLL	LSLVAMEKPASTSSDD	R	D	V	E	K	P	1	0	1	1	0	2	1	0	1	0	4	1	3	0	0	1	0	0	0	2	0	18	0	2099.06	NP_001135196.1;ACI33164.1	NP_001135196.1	262	279	yes	no	3	0.0050706	66.826	By MS/MS	By matching	By matching	By MS/MS	By MS/MS	By matching	By matching	By MS/MS
DVMQNHLLQMLSLVAMEKPASTSSDDVR	FDDFGIIRDVMQNHLL	STSSDDVRDEKVKVLK	R	D	V	V	R	D	2	1	1	3	0	2	1	0	1	0	4	1	3	0	1	4	1	0	0	3	0	28	1	3114.51	NP_001135196.1;ACI33164.1	NP_001135196.1	262	289	yes	no	3;4	9.7903e-14	132.88	By matching	By MS/MS	By matching	By MS/MS	By MS/MS	By MS/MS	By matching	By matching
DVNAAIATIK	YRGDVVPKDVNAAIAT	NAAIATIKTKRSIQFV	K	D	V	I	K	T	3	0	1	1	0	0	0	0	0	2	0	1	0	0	0	0	1	0	0	1	0	10	0	1014.57	ACN58628.1	ACN58628.1	308	317	yes	yes	2	0.0026377	90.793	By matching	By matching	By matching	By MS/MS	By MS/MS	By matching	By matching	By matching
DVNQQEFVR	________________	VNQQEFVRALSAFLKK	K	D	V	V	R	A	0	1	1	1	0	2	1	0	0	0	0	0	0	1	0	0	0	0	0	2	0	9	0	1133.55	ACH85282.1;NP_001134778.1;AGH92557.1;ACI68837.1;ACI68828.1;ACN12290.1;ACN09943.1	ACH85282.1	6	14	yes	no	2	5.9803e-09	204.34	By MS/MS	By MS/MS	By MS/MS	By MS/MS	By MS/MS	By MS/MS	By MS/MS	By matching
DVNSAIAAIK	YRGDVVPKDVNSAIAA	NSAIAAIKTKRSIQFV	K	D	V	I	K	T	3	0	1	1	0	0	0	0	0	2	0	1	0	0	0	1	0	0	0	1	0	10	0	1000.56	NP_001167032.1;ACI33964.1;ACH71025.1;ACN10869.1	NP_001167032.1	327	336	yes	no	2	0.0014396	104.07	By MS/MS	By matching	By matching	By matching	By MS/MS	By matching	By matching	By MS/MS
DVNVAIGNIK	YRGDVVPKDVNVAIGN	NVAIGNIKTKRSIQFV	K	D	V	I	K	T	1	0	2	1	0	0	0	1	0	2	0	1	0	0	0	0	0	0	0	2	0	10	0	1041.58	NP_001133158.1;ACN10896.1;ACH70822.1	NP_001133158.1	327	336	yes	no	2	0.00020984	116.55	By MS/MS	By MS/MS	By matching	By matching	By MS/MS	By matching	By matching	By MS/MS
DVPCDESTACLDGTTCCK	SPPFIRTGDVPCDEST	LDGTTCCKTQEGGWAC	G	D	V	C	K	T	1	0	0	3	4	0	1	1	0	0	1	1	0	0	1	1	3	0	0	1	0	18	0	2087.79	ACN10922.1	ACN10922.1	286	303	yes	yes	2	8.6162e-07	147.49	By matching	By matching	By MS/MS	By matching	By matching	By matching	By MS/MS	By matching
DVQTAFYEIAEELGGMTR	GDARNMARDVQTAFYE	EELGGMTRTQAIDYIK	R	D	V	T	R	T	2	1	0	1	0	1	3	2	0	1	1	0	1	1	0	0	2	0	1	1	0	18	0	2028.95	ACN10454.1	ACN10454.1	639	656	yes	yes	2;3	6.0594e-07	149.47	By matching	By matching	By matching	By matching	By matching	By matching	By matching	By MS/MS
DVSELTGHPEMLGGR	RDAGLAVRDVSELTGH	HPEMLGGRVKTLHPAV	R	D	V	G	R	V	0	1	0	1	0	0	2	3	1	0	2	0	1	0	1	1	1	0	0	1	0	15	0	1596.76	NP_001133622.1;ACI33591.1;ACN10681.1	NP_001133622.1	50	64	no	no	2;3	2.1787e-18	206.67	By MS/MS	By MS/MS	By MS/MS	By MS/MS	By MS/MS	By MS/MS	By MS/MS	By MS/MS
DVSIHDCGK	DGRDKPLKDVSIHDCG	VSIHDCGKIEVEKPFA	K	D	V	G	K	I	0	0	0	2	1	0	0	1	1	1	0	1	0	0	0	1	0	0	0	1	0	9	0	1029.45	AGH92516.1;ACI69864.1;ACI67931.1;ACI69995.1;ACI68543.1	AGH92516.1	196	204	yes	no	2	3.0106e-07	164.46	By MS/MS	By MS/MS	By MS/MS	By MS/MS	By MS/MS	By MS/MS	By MS/MS	By MS/MS
DVSSVDLSVSVLGQR	LLFPRVLRDVSSVDLS	SVSVLGQRISMPVCVG	R	D	V	Q	R	I	0	1	0	2	0	1	0	1	0	0	2	0	0	0	0	4	0	0	0	4	0	15	0	1559.82	ACN12757.1;ACN10394.1;NP_001135240.1;ACI33762.1	ACN12757.1	56	70	yes	no	2	1.1973e-05	134.88	By matching	By matching	By matching	By matching	By MS/MS	By matching	By matching	By matching
DVSVGDIVTVGECR	VHLSPAFRDVSVGDIV	IVTVGECRPLSKTVRF	R	D	V	C	R	P	0	1	0	2	1	0	1	2	0	1	0	0	0	0	0	1	1	0	0	4	0	14	0	1504.72	NP_001117010.1;ACN12270.1;ACN12201.1;ACN09923.1;ACN09854.1;ACI69474.1;ACI66733.1;AAG22824.1;ACH70675.1;ACI66431.1;NP_001134919.1;ACI69460.1	NP_001117010.1	122	135	yes	no	2	1.1129e-05	140.31	By matching	By matching	By matching	By matching	By matching	By matching	By MS/MS	By matching
DVSVGDIVTVGECRPLSK	VHLSPAFRDVSVGDIV	GECRPLSKTVRFNVLK	R	D	V	S	K	T	0	1	0	2	1	0	1	2	0	1	1	1	0	0	1	2	1	0	0	4	0	18	1	1929.98	NP_001117010.1;ACN12270.1;ACN12201.1;ACN09923.1;ACN09854.1;ACI69474.1;ACI66733.1;AAG22824.1;ACH70675.1;ACI66431.1;NP_001134919.1;ACI69460.1	NP_001117010.1	122	139	yes	no	2	4.1922e-13	190.18	By matching	By MS/MS	By MS/MS	By MS/MS	By matching	By MS/MS	By MS/MS	By MS/MS
DVTNMLFNHDR	PKQPELFKDVTNMLFN	NMLFNHDRFKVFADYE	K	D	V	D	R	F	0	1	2	2	0	0	0	0	1	0	1	0	1	1	0	0	1	0	0	1	0	11	0	1360.62	ACN60290.1	ACN60290.1	187	197	yes	yes	2	3.2288e-16	226.33	By MS/MS	By MS/MS	By MS/MS	By MS/MS	By MS/MS	By MS/MS	By MS/MS	By MS/MS
DVTSTVDSLPLITGSIISK	DKVMYALRDVTSTVDS	ITGSIISKKGAESLNA	R	D	V	S	K	K	0	0	0	2	0	0	0	1	0	3	2	1	0	0	1	4	3	0	0	2	0	19	0	1945.06	NP_001133751.1;ACI33838.1	NP_001133751.1	178	196	yes	no	2;3	8.9057e-53	279.19	By MS/MS	By MS/MS	By MS/MS	By MS/MS	By MS/MS	By MS/MS	By MS/MS	By MS/MS
DVVELTDDNFDR	GGGGGSKKDVVELTDD	LTDDNFDRLVLNSDEV	K	D	V	D	R	L	0	1	1	4	0	0	1	0	0	0	1	0	0	1	0	0	1	0	0	2	0	12	0	1436.64	ACN10934.1;ACI33422.1	ACN10934.1	163	174	yes	no	2	4.9959e-07	166.62	By matching	By matching	By MS/MS	By MS/MS	By MS/MS	By MS/MS	By matching	By matching
DVVFEFPEFQL	VYKKLTGKDVVFEFPE	FEFPEFQL________	K	D	V	Q	L	-	0	0	0	1	0	1	2	0	0	0	1	0	0	3	1	0	0	0	0	2	0	11	0	1368.66	ACI67293.1;ACI66314.1;ACI34164.1;ACH70774.1;ACI66988.1;ACI66768.1	ACI67293.1	184	194	yes	no	2	0.0014402	97.163	By MS/MS	By MS/MS	By matching	By matching	By matching	By MS/MS	By MS/MS	By MS/MS
DVVFNPEEDDFEHQLDLR	GCELKSGKDVVFNPEE	FEHQLDLRMLCVDLST	K	D	V	L	R	M	0	1	1	4	0	1	3	0	1	0	2	0	0	2	1	0	0	0	0	2	0	18	0	2216	ACN60173.1;NP_001133620.1;ACI33587.1	ACN60173.1	26	43	yes	no	2;3	0.00021544	105.01	By MS/MS	By MS/MS	By MS/MS	By MS/MS	By MS/MS	By MS/MS	By MS/MS	By MS/MS
DVYTGDALR	VFISAAERDVYTGDAL	VYTGDALRICIVTKEG	R	D	V	L	R	I	1	1	0	2	0	0	0	1	0	0	1	0	0	0	0	0	1	0	1	1	0	9	0	1008.49	ACI67092.1;ACI68289.1	ACI68289.1	210	218	no	no	2	0.0099964	79.148	By MS/MS	By MS/MS	By matching	By MS/MS	By MS/MS	By MS/MS	By MS/MS	By matching
DVYWLQSLTR	LDPSISWKDVYWLQSL	YWLQSLTRLPIIIKGI	K	D	V	T	R	L	0	1	0	1	0	1	0	0	0	0	2	0	0	0	0	1	1	1	1	1	0	10	0	1279.66	NP_001134549.1;ACI67966.1	NP_001134549.1	214	223	yes	no	2	0.00020166	143.97	By MS/MS	By MS/MS	By MS/MS	By MS/MS	By MS/MS	By MS/MS	By MS/MS	By MS/MS
DWFLQTANDQSTVAK	ITNAESARDWFLQTAN	NDQSTVAKHFVALSTN	R	D	W	A	K	H	2	0	1	2	0	2	0	0	0	0	1	1	0	1	0	1	2	1	0	1	0	15	0	1722.82	ACN10743.1	ACN10743.1	226	240	yes	yes	2	1.0689e-54	305.98	By MS/MS	By MS/MS	By MS/MS	By MS/MS	By MS/MS	By MS/MS	By MS/MS	By MS/MS
DWLPELVER	AILVGEARDWLPELVE	WLPELVERSKALRVNA	R	D	W	E	R	S	0	1	0	1	0	0	2	0	0	0	2	0	0	0	1	0	0	1	0	1	0	9	0	1155.59	NP_001136188.1;ACI34215.1	NP_001136188.1	321	329	yes	no	2	0.001043	123.86	By MS/MS	By MS/MS	By MS/MS	By MS/MS	By MS/MS	By MS/MS	By MS/MS	By MS/MS
DWWFGTLDGEFMSMGVYAGGNSYGIPEDLIYSFPVHIK	KAICDHMRDWWFGTLD	YSFPVHIKNKSWNIHD	R	D	W	I	K	N	1	0	1	3	0	0	2	6	1	3	2	1	2	3	2	3	1	2	3	2	0	38	0	4297.98	ACN12543.1;ACN10189.1;ACN12783.1;ACN10417.1;ACI69505.1	ACN12783.1	256	293	no	no	3;4	5.0813e-15	121.24	By MS/MS	By MS/MS	By MS/MS	By MS/MS	By MS/MS	By MS/MS	By MS/MS	By MS/MS
DYATSPLHR	HEDQGLTKDYATSPLH	YATSPLHRFKKPGSKN	K	D	Y	H	R	F	1	1	0	1	0	0	0	0	1	0	1	0	0	0	1	1	1	0	1	0	0	9	0	1058.51	NP_001133760.1;ACN10493.1;ACI33851.1	NP_001133760.1	472	480	yes	no	2	0.004783	92.838	By matching	By MS/MS	By matching	By MS/MS	By matching	By MS/MS	By MS/MS	By MS/MS
DYAVTANSR	TSKIVADKDYAVTANS	YAVTANSRIVVVTAGV	K	D	Y	S	R	I	2	1	1	1	0	0	0	0	0	0	0	0	0	0	0	1	1	0	1	1	0	9	0	995.467	NP_001133969.1;ACI34235.1;ACN11051.1	ACN11051.1	83	91	no	no	2	0.018567	67.93	By matching	By matching	By matching	By MS/MS	By matching	By matching	By MS/MS	By matching
DYFEQFGK	DTEDSHLRDYFEQFGK	DYFEQFGKIEVIDIMT	R	D	Y	G	K	I	0	0	0	1	0	1	1	1	0	0	0	1	0	2	0	0	0	0	1	0	0	8	0	1032.46	ACN12767.1;ACN10402.1;NP_001134235.1;ADM16122.1;ACI66723.1	ACN12767.1	122	129	yes	no	2	1.5275e-06	195.06	By matching	By MS/MS	By MS/MS	By MS/MS	By matching	By MS/MS	By MS/MS	By MS/MS
DYFGAHTYELLSNPGK	ANLLQAQRDYFGAHTY	ELLSNPGKYIHTNWTG	R	D	Y	G	K	Y	1	0	1	1	0	0	1	2	1	0	2	1	0	1	1	1	1	0	2	0	0	16	0	1810.85	ACN10812.1;ACI70192.1;ACI66086.1	ACN10812.1	448	463	yes	no	2;3	5.1537e-44	281.65	By MS/MS	By MS/MS	By MS/MS	By MS/MS	By MS/MS	By MS/MS	By MS/MS	By MS/MS
DYGILLEGPGIALR	DLNKQVSRDYGILLEG	EGPGIALRGLFIIDPN	R	D	Y	L	R	G	1	1	0	1	0	0	1	3	0	2	3	0	0	0	1	0	0	0	1	0	0	14	0	1485.82	ADM15936.1;ACI69604.1	ADM15936.1	165	178	yes	no	2	7.9101e-09	173.06	By MS/MS	By MS/MS	By MS/MS	By MS/MS	By MS/MS	By MS/MS	By MS/MS	By MS/MS
DYGVFLEDAGHALR	DLTHQISKDYGVFLED	EDAGHALRGLFIIDDK	K	D	Y	L	R	G	2	1	0	2	0	0	1	2	1	0	2	0	0	1	0	0	0	0	1	1	0	14	0	1561.75	ACI69656.1	ACI69656.1	178	191	yes	yes	2;3	1.4268e-53	292.39	By MS/MS	By MS/MS	By MS/MS	By MS/MS	By MS/MS	By MS/MS	By MS/MS	By matching
DYGVFLEDAGHTLR	DLTHQISKDYGVFLED	EDAGHTLRGLFIIDDK	K	D	Y	L	R	G	1	1	0	2	0	0	1	2	1	0	2	0	0	1	0	0	1	0	1	1	0	14	0	1591.76	ACI67534.1	ACI67534.1	178	191	yes	yes	2;3	4.2811e-33	247.73	By MS/MS	By MS/MS	By MS/MS	By MS/MS	By MS/MS	By MS/MS	By MS/MS	By MS/MS
DYGVLLEGPGIALR	DLNKQVSRDYGVLLEG	EGPGIALRGLFIIDPN	R	D	Y	L	R	G	1	1	0	1	0	0	1	3	0	1	3	0	0	0	1	0	0	0	1	1	0	14	0	1471.8	ACI69558.1;ACI66477.1;ACH85347.1;ADM15885.1;ACI67209.1;ACI68510.1	ACI69558.1	164	177	yes	no	2	1.5076e-13	197.36	By MS/MS	By MS/MS	By MS/MS	By MS/MS	By MS/MS	By MS/MS	By MS/MS	By MS/MS
DYHIEEGEELFYQLK	VGGPNSRKDYHIEEGE	EELFYQLKGDMCLKLV	K	D	Y	L	K	G	0	0	0	1	0	1	4	1	1	1	2	1	0	1	0	0	0	0	2	0	0	15	0	1911.89	ADM16040.1;ACI69087.1;NP_001134951.1;ADM15971.1;ACI69619.1	ADM16040.1	48	62	yes	no	3	8.5459e-06	134.99	By matching	By matching	By matching	By matching	By matching	By MS/MS	By MS/MS	By MS/MS
DYLADPTAFAVAAPVAVAETAAAPAAAK	FPLADKVKDYLADPTA	AAAPAAAKEEAKEESE	K	D	Y	A	K	E	13	0	0	2	0	0	1	0	0	0	1	1	0	1	3	0	2	0	1	3	0	28	0	2642.36	ACN12682.1;ACN10322.1;ACI69835.1;ACH70801.1	ACN12682.1	267	294	yes	no	2;3	1.0455e-07	104.6	By MS/MS	By MS/MS	By MS/MS	By MS/MS	By MS/MS	By MS/MS	By MS/MS	By MS/MS
DYLHLIMEATADGR	SSSRWQRRDYLHLIME	MEATADGRVLEYDTET	R	D	Y	G	R	V	2	1	0	2	0	0	1	1	1	1	2	0	1	0	0	0	1	0	1	0	0	14	0	1603.77	NP_001133727.1;B5X3B2.1;ACI33793.1	NP_001133727.1	225	238	yes	no	2	7.5275e-06	144.8	By MS/MS	By MS/MS	By MS/MS	By matching	By matching	By matching	By matching	By matching
DYLHYIR	QRTIVIRRDYLHYIRK	RDYLHYIRKYNRFEKR	R	D	Y	I	R	K	0	1	0	1	0	0	0	0	1	1	1	0	0	0	0	0	0	0	2	0	0	7	0	978.492	NP_001117010.1;ACN12270.1;ACN12201.1;ACN09923.1;ACN09854.1;ACI69474.1;ACI66733.1;AAG22824.1;ACH70675.1;ACI66431.1;ACI68815.1;ACI66616.1	NP_001117010.1	94	100	yes	no	2	0.0044043	97.602	By MS/MS	By MS/MS	By MS/MS	By MS/MS	By MS/MS	By MS/MS	By MS/MS	By matching
DYLLCDYNR	ARDKVVGKDYLLCDYN	YLLCDYNRDGDSYRSP	K	D	Y	N	R	D	0	1	1	2	1	0	0	0	0	0	2	0	0	0	0	0	0	0	2	0	0	9	0	1230.53	ACN10552.1;ACI33944.1;ACI68515.1;ACH70650.1;ACI70143.1;ACI68400.1	ACN10552.1	58	66	yes	no	2	0.00052558	142.43	By MS/MS	By MS/MS	By MS/MS	By MS/MS	By MS/MS	By MS/MS	By MS/MS	By matching
DYLTGDNSDIIPTDTVK	ELTLKSRKDYLTGDNS	IIPTDTVKNTVHALAK	K	D	Y	V	K	N	0	0	1	4	0	0	0	1	0	2	1	1	0	0	1	1	3	0	1	1	0	17	0	1865.89	AAZ92542.1	AAZ92542.1	44	60	yes	yes	2	1.2177e-37	258.13	By MS/MS	By MS/MS	By MS/MS	By MS/MS	By MS/MS	By MS/MS	By MS/MS	By MS/MS
DYPNTPTPSPEK	GSTIFGNRDYPNTPTP	TPTPSPEKKSKVPTEE	R	D	Y	E	K	K	0	0	1	1	0	0	1	0	0	0	0	1	0	0	4	1	2	0	1	0	0	12	0	1344.62	ACI69195.1;NP_001135276.1;ACI34146.1	ACI69195.1	250	261	yes	no	2	0.00093109	96.23	By matching	By matching	By matching	By matching	By matching	By matching	By matching	By matching
DYPVVSIEDPFDQDDWAAWSK	DLYKSFVKDYPVVSIE	DDWAAWSKFTAETSIQ	K	D	Y	S	K	F	2	0	0	5	0	1	1	0	0	1	0	1	0	1	2	2	0	2	1	2	0	21	0	2482.1	NP_001133366.1;ACI33096.1;CBL79146.1	NP_001133366.1	286	306	yes	no	2;3	4.1278e-53	274.82	By MS/MS	By MS/MS	By MS/MS	By MS/MS	By MS/MS	By MS/MS	By MS/MS	By MS/MS
DYQELMNTK	EDLARLLRDYQELMNT	YQELMNTKLALDLEIA	R	D	Y	T	K	L	0	0	1	1	0	1	1	0	0	0	1	1	1	0	0	0	1	0	1	0	0	9	0	1140.51	CON__P04264	CON__P04264	464	472	no	no	2	0.001988	103.08	By MS/MS	By matching	By matching	By matching	By matching	By matching	By matching	By matching
DYQELMNVK	EDLARLLRDYQELMNV	YQELMNVKLALDVEIA	R	D	Y	V	K	L	0	0	1	1	0	1	1	0	0	0	1	1	1	0	0	0	0	0	1	1	0	9	0	1138.53	CON__P35908	CON__P35908	468	476	no	no	2	0.0036339	87.476	By matching	By MS/MS	By matching	By matching	By MS/MS	By MS/MS	By matching	By MS/MS
DYSDLYVTSACK	TSCCFGGRDYSDLYVT	LYVTSACKGMDEADMA	R	D	Y	C	K	G	1	0	0	2	1	0	0	0	0	0	1	1	0	0	0	2	1	0	2	1	0	12	0	1420.62	NP_001134866.1;ACN12717.1;ACN10357.1;ACI69215.1	NP_001134866.1	253	264	yes	no	2	6.818e-10	196.27	By matching	By matching	By matching	By matching	By matching	By matching	By MS/MS	By MS/MS
DYTGDAVTPDNFLAVLK	DVYEGVPKDYTGDAVT	DNFLAVLKGDSASTKG	K	D	Y	L	K	G	2	0	1	3	0	0	0	1	0	0	2	1	0	1	1	0	2	0	1	2	0	17	0	1837.91	NP_001158867.1;ACN10644.1	NP_001158867.1	103	119	yes	no	2	3.2305e-13	178.47	By MS/MS	By MS/MS	By MS/MS	By MS/MS	By MS/MS	By MS/MS	By MS/MS	By MS/MS
DYVAPTANMNQK	ERKVRIWKDYVAPTAN	PTANMNQKDRQFVAKV	K	D	Y	Q	K	D	2	0	2	1	0	1	0	0	0	0	0	1	1	0	1	0	1	0	1	1	0	12	0	1350.62	ACN60284.1	ACN60284.1	266	277	yes	yes	2	0.00062439	101.72	By matching	By matching	By MS/MS	By MS/MS	By matching	By MS/MS	By MS/MS	By MS/MS
DYYFALAHTVR	DRNVATPRDYYFALAH	FALAHTVRDHLVGRWI	R	D	Y	V	R	D	2	1	0	1	0	0	0	0	1	0	1	0	0	1	0	0	1	0	2	1	0	11	0	1354.67	NP_001167051.1;ACN10690.1	NP_001167051.1	51	61	yes	no	2	8.4081e-07	174.57	By MS/MS	By MS/MS	By MS/MS	By MS/MS	By MS/MS	By MS/MS	By MS/MS	By MS/MS
EAAALGSHGNSAVEVDKETVGK	REKDFKTKEAAALGSH	VDKETVGKMGSIQTSY	K	E	A	G	K	M	4	0	1	1	0	0	3	3	1	0	1	2	0	0	0	2	1	0	0	3	0	22	1	2168.07	AGH92624.1;ADM16312.1;ADM16148.1;ADM16070.1;ACM09636.1;ACM09126.1;ACI69045.1;ACI68877.1;ACI68745.1;ACI68730.1;ACI68363.1;ACI66173.1;ADM16210.1;ACI70051.1	AGH92624.1	59	80	yes	no	3	4.3229e-05	93.215	By matching	By matching	By matching	By matching	By matching	By MS/MS	By matching	By matching
EAAENSLVAYK	FATGNDRKEAAENSLV	ENSLVAYKAASDIAMI	K	E	A	Y	K	A	3	0	1	0	0	0	2	0	0	0	1	1	0	0	0	1	0	0	1	1	0	11	0	1193.59	ACI34249.1;ACI33769.1;ACH70649.1	ACI34249.1	143	153	no	no	2	0.00026828	123.62	By MS/MS	By MS/MS	By MS/MS	By MS/MS	By MS/MS	By MS/MS	By MS/MS	By MS/MS
EAALIDMMCDGVEDLR	DAYGKDGKEAALIDMM	CDGVEDLRLKYAKMIY	K	E	A	L	R	L	2	1	0	3	1	0	2	1	0	1	2	0	2	0	0	0	0	0	0	1	0	16	0	1836.81	ACI69603.1;ACI68362.1;ACN12309.1;ACN09962.1;ACI70112.1;ACI69773.1	ACN12309.1	86	101	no	no	2;3	9.8752e-82	344.38	By MS/MS	By MS/MS	By MS/MS	By MS/MS	By MS/MS	By MS/MS	By MS/MS	By MS/MS
EAALIDMMDEAIQDLLNK	GLYGKDQREAALIDMM	AIQDLLNKYIKLMFEK	R	E	A	N	K	Y	3	0	1	3	0	1	2	0	0	2	3	1	2	0	0	0	0	0	0	0	0	18	0	2031.99	ADM16035.1;ACI69006.1;ACI68380.1;ACM09568.1	ADM16035.1	85	102	yes	no	2;3	2.7836e-90	348.33	By MS/MS	By MS/MS	By MS/MS	By matching	By matching	By matching	By matching	By MS/MS
EAAPAEEEMDECEAALASEPK	EKKKKEEKEAAPAEEE	AALASEPKTKDPFAHL	K	E	A	P	K	T	6	0	0	1	1	0	7	0	0	0	1	1	1	0	2	1	0	0	0	0	0	21	0	2275.95	ACM08681.1;ACH85278.1;NP_001135112.1;ACM09182.1;ACI33692.1;NP_001133235.1;ACH85371.1	ACM08681.1	263	283	yes	no	2	2.8221e-23	214.3	By MS/MS	By matching	By MS/MS	By matching	By MS/MS	By MS/MS	By matching	By matching
EADAIAVDGGEVYTAGK	CIKKIMRKEADAIAVD	GEVYTAGKCGLVPVMV	K	E	A	G	K	C	4	0	0	2	0	0	2	3	0	1	0	1	0	0	0	0	1	0	1	2	0	17	0	1664.79	ACI33444.1;P80426.1;NP_001117127.1;AAA18838.1;P80429.1	ACI33444.1	387	403	yes	no	2	8.0698e-20	211.9	By MS/MS	By MS/MS	By MS/MS	By MS/MS	By MS/MS	By MS/MS	By MS/MS	By MS/MS
EADGTESPEPFAAEAK	VKCPTFKREADGTESP	EPFAAEAKFFTESRLL	R	E	A	A	K	F	4	0	0	1	0	0	4	1	0	0	0	1	0	1	2	1	1	0	0	0	0	16	0	1647.73	ACN60284.1	ACN60284.1	172	187	yes	yes	2	8.141e-13	178.03	By matching	By matching	By MS/MS	By matching	By matching	By matching	By matching	By matching
EADIDGDGQVNYEEFVQMMTAK	EEVDEMIREADIDGDG	FVQMMTAK________	R	E	A	A	K	-	2	0	1	3	0	2	3	2	0	1	0	1	2	1	0	0	1	0	1	2	0	22	0	2489.07	NP_001133186.1;NP_001133185.1;AGH92603.1;AGH92538.1;ADM16085.1;ADM16072.1;ACN12735.1;ACN12704.1;ACN12698.1;ACN12518.1;ACN11206.1;ACN10373.1;ACN10344.1;ACN10338.1;ACN10165.1;ACM09550.1;ACM09448.1;ACM09085.1;ACM08633.1;ACM08610.1;ACM08237.1;ACI69721.1;ACI68583.1;ACI68402.1;ACI66692.1;ACI66075.1;ACI33806.1;ACI33505.1;ACH70912.1;ACH70911.1;ACH70910.1;ACM09117.1	NP_001133186.1	128	149	yes	no	2;3	6.096e-46	252.41	By MS/MS	By MS/MS	By MS/MS	By MS/MS	By MS/MS	By MS/MS	By MS/MS	By MS/MS
EADITNFVSFITK	IDKLLSNREADITNFV	NFVSFITKDSIQRSLR	R	E	A	T	K	D	1	0	1	1	0	0	1	0	0	2	0	1	0	2	0	1	2	0	0	1	0	13	0	1483.76	ACN11185.1	ACN11185.1	272	284	yes	yes	2	1.0729e-14	202.25	By MS/MS	By MS/MS	By MS/MS	By MS/MS	By MS/MS	By MS/MS	By MS/MS	By MS/MS
EADLINLR	WAEAGFVKEADLINLR	EADLINLRKIDSDLEG	K	E	A	L	R	K	1	1	1	1	0	0	1	0	0	1	2	0	0	0	0	0	0	0	0	0	0	8	0	942.513	NP_001134006.1;ACI34298.1	NP_001134006.1	94	101	yes	no	2	0.0024258	101.72	By MS/MS	By matching	By matching	By matching	By MS/MS	By MS/MS	By matching	By matching
EAEAAIFQQQLFEELR	TMMHSICREAEAAIFQ	QQLFEELRRLTPLSND	R	E	A	L	R	R	3	1	0	0	0	3	4	0	0	1	2	0	0	2	0	0	0	0	0	0	0	16	0	1920.96	ACN11437.1	ACN11437.1	380	395	yes	yes	2;3	1.4376e-43	273.54	By MS/MS	By MS/MS	By MS/MS	By MS/MS	By MS/MS	By MS/MS	By MS/MS	By MS/MS
EAEAESIDK	GIRAKRAKEAEAESID	AEAESIDKKK______	K	E	A	D	K	K	2	0	0	1	0	0	3	0	0	1	0	1	0	0	0	1	0	0	0	0	0	9	0	990.451	NP_001134763.1;ACN12432.1;ACN10085.1;ACI68750.1;ACH70813.1	NP_001134763.1	201	209	yes	no	2	0.06684	50.034	By matching	By matching	By MS/MS	By matching	By matching	By matching	By matching	By matching
EAEEFGNETWGATK	FLIGDDIKEAEEFGNE	NETWGATKDPEKKMKD	K	E	A	T	K	D	2	0	1	0	0	0	4	2	0	0	0	1	0	1	0	0	2	1	0	0	0	14	0	1567.68	ACN10698.1;ACI32936.1	ACN10698.1	339	352	yes	no	2	3.676e-33	250.05	By MS/MS	By MS/MS	By MS/MS	By MS/MS	By MS/MS	By MS/MS	By MS/MS	By MS/MS
EAEQALLQCCDMEDHAECVK	QVILRFAKEAEQALLQ	EDHAECVKTALAGSDI	K	E	A	V	K	T	3	0	0	2	3	2	4	0	1	0	2	1	1	0	0	0	0	0	0	1	0	20	0	2434.99	P21848.1;NP_001117137.1;CAA36643.1;Q03156.1;NP_001117164.1;CAA43187.1	Q03156.1	372	391	no	no	2;3	4.7354e-31	233.65	By MS/MS	By MS/MS	By MS/MS	By MS/MS	By MS/MS	By MS/MS	By MS/MS	By MS/MS
EAESCDCLQGFQLTHSLGGGTGSGMGTLLISK	SVLDVVRKEAESCDCL	MGTLLISKIREEYPDR	K	E	A	S	K	I	1	0	0	1	2	2	2	7	1	1	5	1	1	1	0	4	3	0	0	0	0	32	0	3310.53	ACN12631.1;ACN11362.1;ACN10275.1;NP_001133265.1;ACI32926.1;ABQ59661.1;ABO13873.1;ACN12531.1;ACN10433.1;ACN10177.1;ACM09816.1;ACM08771.1	ACN12531.1	123	154	no	no	3	2.0173e-13	129.82	By MS/MS	By MS/MS	By MS/MS	By MS/MS	By MS/MS	By MS/MS	By MS/MS	By MS/MS
EAETLVTSFFPQK	DFCTRLTKEAETLVTS	VTSFFPQKIAEMEMLL	K	E	A	Q	K	I	1	0	0	0	0	1	2	0	0	0	1	1	0	2	1	1	2	0	0	1	0	13	0	1495.76	AHG98246.1;ACM09558.1;ACM09013.1;AGH92619.1;ACM09791.1;ACM09398.1;ACM09008.1;ACM08964.1	AHG98246.1	24	36	no	no	2	1.5851e-05	127.17	By MS/MS	By MS/MS	By MS/MS	By MS/MS	By MS/MS	By MS/MS	By MS/MS	By MS/MS
EAFADSVFSWIEQYAPGFK	RAWTDQDREAFADSVF	EQYAPGFKSSIVGKDV	R	E	A	F	K	S	3	0	0	1	0	1	2	1	0	1	0	1	0	3	1	2	0	1	1	1	0	19	0	2191.03	NP_001135210.1;ACI33325.1	NP_001135210.1	473	491	yes	no	2	6.3818e-06	112.55	By matching	By matching	By matching	By matching	By matching	By MS/MS	By MS/MS	By matching
EAFDEAIGHLDNLNEDSYK	EEACKLAKEAFDEAIG	NLNEDSYKDSTLIMQL	K	E	A	Y	K	D	2	0	2	3	0	0	3	1	1	1	2	1	0	1	0	1	0	0	1	0	0	19	0	2178.97	NP_001133693.1;ACI33711.1	NP_001133693.1	198	216	yes	no	2;3	3.1413e-66	300.87	By MS/MS	By MS/MS	By MS/MS	By MS/MS	By matching	By MS/MS	By MS/MS	By matching
EAFDRDAELQNLLLDTFFSNAVQDCQDSWR	SVFLGKIKEAFDRDAE	QDCQDSWRRTVSIGVQ	K	E	A	W	R	R	3	2	2	5	1	3	2	0	0	0	4	0	0	3	0	2	1	1	0	1	0	30	1	3602.64	ACN10812.1	ACN10812.1	378	407	yes	yes	3	0.047445	30.595	By matching	By matching	By matching	By matching	By matching	By matching	By matching	By MS/MS
EAFFCGGLTLGQK	DVIVGKDREAFFCGGL	GGLTLGQKKFSVIRDS	R	E	A	Q	K	K	1	0	0	0	1	1	1	3	0	0	2	1	0	2	0	0	1	0	0	0	0	13	0	1426.69	ACM08604.1;ACI34313.1;ACN10854.1	ACM08604.1	56	68	no	no	2	1.4464e-07	166.45	By MS/MS	By MS/MS	By matching	By MS/MS	By MS/MS	By MS/MS	By MS/MS	By MS/MS
EAFLLFDR	EDQIMEFKEAFLLFDR	EAFLLFDRTGDGKISY	K	E	A	D	R	T	1	1	0	1	0	0	1	0	0	0	2	0	0	2	0	0	0	0	0	0	0	8	0	1009.52	AGH92555.1;ACI69975.1;ACI67608.1;AGH92529.1;ACI70081.1;NP_001134962.1;ACI69653.1	AGH92555.1	14	21	no	no	2	0.0019448	105.1	By MS/MS	By MS/MS	By MS/MS	By MS/MS	By MS/MS	By MS/MS	By MS/MS	By matching
EAFNMIDQNR	QSQIQEFKEAFNMIDQ	FNMIDQNRDGFVDKED	K	E	A	N	R	D	1	1	2	1	0	1	1	0	0	1	0	0	1	1	0	0	0	0	0	0	0	10	0	1236.56	ADM15912.1;ACI69826.1;ACI69090.1;ACI66978.1;ACI33189.1;ADM15886.1;ACI68070.1;ACH70954.1;ACI67885.1;ACI66712.1;ACI66702.1;ACH70953.1;ACI69179.1;ACI66544.1	ADM15886.1	36	45	no	no	2	4.8166e-05	160.72	By MS/MS	By MS/MS	By MS/MS	By MS/MS	By MS/MS	By MS/MS	By MS/MS	By MS/MS
EAFSLFDK	EEQIAEFKEAFSLFDK	EAFSLFDKDGDGTITT	K	E	A	D	K	D	1	0	0	1	0	0	1	0	0	0	1	1	0	2	0	1	0	0	0	0	0	8	0	955.465	NP_001133186.1;NP_001133185.1;AGH92603.1;AGH92538.1;ADM16085.1;ADM16072.1;ACN12735.1;ACN12704.1;ACN12698.1;ACN12518.1;ACN11206.1;ACN10373.1;ACN10344.1;ACN10338.1;ACN10165.1;ACM09550.1;ACM09448.1;ACM09085.1;ACM08633.1;ACM08610.1;ACM08237.1;ACI69721.1;ACI68583.1;ACI68402.1;ACI66692.1;ACI66075.1;ACI33806.1;ACI33505.1;ACH70912.1;ACH70911.1;ACH70910.1;ADM16205.1;ACI68592.1;ACM09117.1;ACI66085.1	NP_001133186.1	15	22	yes	no	2	0.0091643	82.75	By MS/MS	By matching	By matching	By matching	By MS/MS	By matching	By matching	By matching
EAFSLFDKDGDGTITTK	EEQIAEFKEAFSLFDK	GDGTITTKELGTVMRS	K	E	A	T	K	E	1	0	0	3	0	0	1	2	0	1	1	2	0	2	0	1	3	0	0	0	0	17	1	1843.88	NP_001133186.1;NP_001133185.1;AGH92603.1;AGH92538.1;ADM16085.1;ADM16072.1;ACN12735.1;ACN12704.1;ACN12698.1;ACN12518.1;ACN11206.1;ACN10373.1;ACN10344.1;ACN10338.1;ACN10165.1;ACM09550.1;ACM09448.1;ACM09085.1;ACM08633.1;ACM08610.1;ACM08237.1;ACI69721.1;ACI68583.1;ACI68402.1;ACI66692.1;ACI66075.1;ACI33806.1;ACI33505.1;ACH70912.1;ACH70911.1;ACH70910.1;ADM16205.1;ACI68592.1;ACM09117.1;ACI66085.1	NP_001133186.1	15	31	yes	no	2;3	6.8895e-48	273.44	By MS/MS	By MS/MS	By MS/MS	By MS/MS	By MS/MS	By MS/MS	By MS/MS	By MS/MS
EAGCGYDSVVK	VNMGEILKEAGCGYDS	CGYDSVVKTTVLLADM	K	E	A	V	K	T	1	0	0	1	1	0	1	2	0	0	0	1	0	0	0	1	0	0	1	2	0	11	0	1183.52	ACM08612.1;ACM09640.1	ACM08612.1	68	78	no	no	2	0.0012306	100.69	By MS/MS	By MS/MS	By MS/MS	By matching	By MS/MS	By MS/MS	By MS/MS	By MS/MS
EAGDVCFADVQR	QDLKDHMREAGDVCFA	VCFADVQRDGEGVVEF	R	E	A	Q	R	D	2	1	0	2	1	1	1	1	0	0	0	0	0	1	0	0	0	0	0	2	0	12	0	1365.6	NP_001133886.1;ACN11334.1;ACI34079.1	NP_001133886.1	134	145	yes	no	2	7.1347e-07	162.49	By matching	By matching	By MS/MS	By matching	By matching	By matching	By matching	By matching
EAGLTGPGVESTR	DVGWRIRKEAGLTGPG	GPGVESTRTRQGRRYS	K	E	A	T	R	T	1	1	0	0	0	0	2	3	0	0	1	0	0	0	1	1	2	0	0	1	0	13	0	1272.63	NP_001133776.1;ACI33880.1	NP_001133776.1	532	544	yes	no	2	0.00015658	117.27	By matching	By MS/MS	By MS/MS	By MS/MS	By matching	By MS/MS	By MS/MS	By MS/MS
EAGLWNLFLPAVSGLSQLDYAHIAEETGR	EDLKVKAREAGLWNLF	HIAEETGRCLYAPDIF	R	E	A	G	R	C	4	1	1	1	0	1	3	3	1	1	5	0	0	1	1	2	1	1	1	1	0	29	0	3156.59	NP_001133320.1;ACI33024.1	NP_001133320.1	420	448	yes	no	3	1.147e-07	93.179	By MS/MS	By MS/MS	By MS/MS	By MS/MS	By MS/MS	By MS/MS	By MS/MS	By MS/MS
EAGMPGGMGGMGGGMGGGMF	TELPKDEKEAGMPGGM	GGMGGGMF________	K	E	A	M	F	-	1	0	0	0	0	0	1	11	0	0	0	0	5	1	1	0	0	0	0	0	0	20	0	1744.65	ACI33148.1	ACI33148.1	555	574	yes	yes	2	1.6881e-05	109.14	By matching	By matching	By matching	By MS/MS	By MS/MS	By matching	By MS/MS	By matching
EAGTTEEVVYAQTQAIADNVK	IGEKLEEREAGTTEEV	QAIADNVKDWSKVVLA	R	E	A	V	K	D	4	0	1	1	0	2	3	1	0	1	0	1	0	0	0	0	3	0	1	3	0	21	0	2236.09	ACN12560.1;ACN10206.1;ACI68030.1;ACI68071.1;ACI68763.1	ACN12560.1	135	155	yes	no	2;3	6.4269e-53	268.49	By MS/MS	By MS/MS	By MS/MS	By MS/MS	By MS/MS	By MS/MS	By MS/MS	By MS/MS
EAGVFESVRPTGK	TKEFNNMREAGVFESV	ESVRPTGK________	R	E	A	G	K	-	1	1	0	0	0	0	2	2	0	0	0	1	0	1	1	1	1	0	0	2	0	13	1	1375.71	ACI66997.1;ACI66043.1	ACI66997.1	64	76	yes	no	2	1.0049e-09	179.59	By matching	By MS/MS	By MS/MS	By MS/MS	By MS/MS	By MS/MS	By MS/MS	By MS/MS
EAGVPDGLFNVVQGGAETGTLLCNHPGVAK	VILAEIYKEAGVPDGL	CNHPGVAKVSFTGSVP	K	E	A	A	K	V	3	0	2	1	1	1	2	6	1	0	3	1	0	1	2	0	2	0	0	4	0	30	0	3006.49	NP_001133574.1;ACN10881.1;ACI33507.1	NP_001133574.1	208	237	yes	no	3	2.7685e-05	75.43	By MS/MS	By MS/MS	By MS/MS	By MS/MS	By MS/MS	By MS/MS	By MS/MS	By MS/MS
EAIDGTYIDK	GLGFKTPREAIDGTYI	IDGTYIDKKCPFTGNV	R	E	A	D	K	K	1	0	0	2	0	0	1	1	0	2	0	1	0	0	0	0	1	0	1	0	0	10	0	1123.54	NP_001117010.1;ACN12270.1;ACN12201.1;ACN09923.1;ACN09854.1;ACI69474.1;ACI66733.1;AAG22824.1;ACH70675.1;ACI68815.1;ACI66616.1	NP_001117010.1	52	61	yes	no	2	0.0028777	88.134	By MS/MS	By MS/MS	By matching	By MS/MS	By MS/MS	By MS/MS	By MS/MS	By MS/MS
EAIDGTYIDKK	GLGFKTPREAIDGTYI	DGTYIDKKCPFTGNVS	R	E	A	K	K	C	1	0	0	2	0	0	1	1	0	2	0	2	0	0	0	0	1	0	1	0	0	11	1	1251.63	NP_001117010.1;ACN12270.1;ACN12201.1;ACN09923.1;ACN09854.1;ACI69474.1;ACI66733.1;AAG22824.1;ACH70675.1;ACI68815.1;ACI66616.1	NP_001117010.1	52	62	yes	no	2	8.1766e-06	182.92	By matching	By MS/MS	By MS/MS	By MS/MS	By matching	By MS/MS	By matching	By matching
EAIDNTNRPNPGGHER	SRKGRSKKEAIDNTNR	PNPGGHERKLIKKLQN	K	E	A	E	R	K	1	2	3	1	0	0	2	2	1	1	0	0	0	0	2	0	1	0	0	0	0	16	1	1775.83	ACI68909.1;ACI68160.1;ACI68567.1	ACI68909.1	45	60	yes	no	2;3	0.00017252	115.12	By matching	By matching	By matching	By MS/MS	By MS/MS	By MS/MS	By matching	By MS/MS
EAIVGAGTDEACLIEILSSR	RFDASQLKEAIVGAGT	LIEILSSRSNAEIREI	K	E	A	S	R	S	3	1	0	1	1	0	3	2	0	3	2	0	0	0	0	2	1	0	0	1	0	20	0	2103.05	ACN11191.1	ACN11191.1	308	327	yes	yes	2	2.8301e-16	190.37	By MS/MS	By MS/MS	By MS/MS	By MS/MS	By MS/MS	By MS/MS	By MS/MS	By MS/MS
EALAQSVLAELPGQVVSYFSIHK	RQFQNAPREALAQSVL	VSYFSIHKLKPPHDPE	R	E	A	H	K	L	3	0	0	0	0	2	2	1	1	1	3	1	0	1	1	3	0	0	1	3	0	23	0	2485.32	ACN60210.1	ACN60210.1	240	262	yes	yes	3	0.00031826	76.301	By matching	By MS/MS	By matching	By matching	By MS/MS	By MS/MS	By matching	By matching
EALDWLIR	ELERQGRKEALDWLIR	EALDWLIRETQPIA__	K	E	A	I	R	E	1	1	0	1	0	0	1	0	0	1	2	0	0	0	0	0	0	1	0	0	0	8	0	1014.55	NP_001135239.1;ACI33755.1	NP_001135239.1	613	620	yes	no	2	0.0021387	103.74	By MS/MS	By MS/MS	By MS/MS	By matching	By matching	By matching	By MS/MS	By matching
EALGVCVGIGAWNYPFQIACWK	GSFAYTRREALGVCVG	PFQIACWKSAPALACG	R	E	A	W	K	S	3	0	1	0	2	1	1	3	0	2	1	1	0	1	1	0	0	2	1	2	0	22	0	2538.22	NP_001133574.1;ACN10881.1;ACI33507.1	NP_001133574.1	155	176	yes	no	2;3	3.9978e-05	90.385	By matching	By matching	By matching	By matching	By matching	By matching	By matching	By MS/MS
EALKDTHDDLSDLNAMQQESLNEWETQFTQK	LATFCLEKEALKDTHD	WETQFTQKYDYVGKLL	K	E	A	Q	K	Y	2	0	2	4	0	4	4	0	1	0	4	2	1	1	0	2	3	1	0	0	0	31	1	3663.66	NP_001139831.1;ACM08229.1	NP_001139831.1	122	152	yes	no	3;4	2.0907e-31	181.02	By MS/MS	By MS/MS	By MS/MS	By MS/MS	By MS/MS	By MS/MS	By MS/MS	By MS/MS
EALTYDGALLGDR	FDDLESLKEALTYDGA	DGALLGDRSLRVDIAE	K	E	A	D	R	S	2	1	0	2	0	0	1	2	0	0	3	0	0	0	0	0	1	0	1	0	0	13	0	1392.69	NP_001133347.1;ACN10439.1;ACI33070.1	NP_001133347.1	97	109	yes	no	2	1.42e-07	166.62	By MS/MS	By MS/MS	By MS/MS	By MS/MS	By MS/MS	By MS/MS	By MS/MS	By MS/MS
EAPPMEKPEVVK	KRLRKAKKEAPPMEKP	MEKPEVVKTHLRDMVI	K	E	A	V	K	T	1	0	0	0	0	0	3	0	0	0	0	2	1	0	3	0	0	0	0	2	0	12	1	1352.7	NP_001134215.1;NP_001117003.1;ACI66641.1;ACH70998.1;AAD16877.1;ACN12355.1;ACN10008.1;ACN12250.1;ACN09903.1	NP_001134215.1	66	77	yes	no	2	3.7374e-06	166.24	By MS/MS	By MS/MS	By MS/MS	By MS/MS	By MS/MS	By MS/MS	By MS/MS	By MS/MS
EAPREPEQLR	________________	PREPEQLRKLFIGGLS	K	E	A	L	R	K	1	2	0	0	0	1	3	0	0	0	1	0	0	0	2	0	0	0	0	0	0	10	1	1223.63	ACN12767.1;ACN10402.1;NP_001134235.1;ADM16122.1;ACI66723.1	ACN12767.1	4	13	yes	no	2	0.0023433	134.57	By MS/MS	By MS/MS	By MS/MS	By MS/MS	By MS/MS	By matching	By matching	By matching
EAPWQTGSEK	SSKGFVVREAPWQTGS	PWQTGSEKAPDMSSSE	R	E	A	E	K	A	1	0	0	0	0	1	2	1	0	0	0	1	0	0	1	1	1	1	0	0	0	10	0	1131.52	NP_001167124.1;ACN10888.1	NP_001167124.1	1242	1251	yes	no	2	0.0028777	88.134	By MS/MS	By MS/MS	By matching	By MS/MS	By matching	By MS/MS	By MS/MS	By MS/MS
EAQDQFAAQSQNR	AKQWGVSREAQDQFAA	FAAQSQNRTEAAQKAG	R	E	A	N	R	T	3	1	1	1	0	4	1	0	0	0	0	0	0	1	0	1	0	0	0	0	0	13	0	1491.67	NP_001133421.1;ACI33207.1	NP_001133421.1	174	186	yes	no	2	8.5206e-60	316.65	By MS/MS	By MS/MS	By MS/MS	By MS/MS	By MS/MS	By MS/MS	By MS/MS	By MS/MS
EAQKELEELIK	VGTEEAVREAQKELEE	KELEELIKSLDNVVED	R	E	A	I	K	S	1	0	0	0	0	1	4	0	0	1	2	2	0	0	0	0	0	0	0	0	0	11	1	1328.72	NP_001167124.1;ACN10888.1	NP_001167124.1	782	792	yes	no	2	7.2404e-05	154.15	By matching	By MS/MS	By MS/MS	By MS/MS	By matching	By MS/MS	By matching	By matching
EASDNTNRPNPGGHER	SRKGRSKKEASDNTNR	PNPGGHERKLVEKLQN	K	E	A	E	R	K	1	2	3	1	0	0	2	2	1	0	0	0	0	0	2	1	1	0	0	0	0	16	1	1749.78	ACM08463.1	ACM08463.1	55	70	yes	yes	2;3	0.0036477	102.63	By matching	By matching	By MS/MS	By MS/MS	By MS/MS	By MS/MS	By matching	By MS/MS
EASLGAGFSDK	VKTSNVAREASLGAGF	LGAGFSDKIPSHTVTM	R	E	A	D	K	I	2	0	0	1	0	0	1	2	0	0	1	1	0	1	0	2	0	0	0	0	0	11	0	1080.51	ACN10637.1	ACN10637.1	118	128	yes	yes	2	0.010512	77.387	By MS/MS	By MS/MS	By MS/MS	By MS/MS	By matching	By MS/MS	By MS/MS	By MS/MS
EATFTVDGGQR	GALAYGVKEATFTVDG	FTVDGGQRAIIFNRIG	K	E	A	Q	R	A	1	1	0	1	0	1	1	2	0	0	0	0	0	1	0	0	2	0	0	1	0	11	0	1179.55	ACN11082.1;NP_001134876.1;ACI69259.1;ACN12654.1;ACN10295.1	ACN11082.1	28	38	yes	no	2	2.67e-06	170.52	By MS/MS	By MS/MS	By MS/MS	By MS/MS	By MS/MS	By MS/MS	By MS/MS	By MS/MS
EATNPLVAQEEETSK	DFISYLKREATNPLVA	AQEEETSKKNIQIEL_	R	E	A	S	K	K	2	0	1	0	0	1	4	0	0	0	1	1	0	0	1	1	2	0	0	1	0	15	0	1644.78	ACN10701.1;ACI33158.1;ACH85350.1;NP_001161991.1;ACS28414.1	NP_001161991.1	472	486	no	no	2	6.0194e-43	276.34	By MS/MS	By MS/MS	By MS/MS	By MS/MS	By MS/MS	By MS/MS	By MS/MS	By matching
EATNPLVAQEEK	DFISYLKREATNPLVA	PLVAQEEKSKNIQIEL	R	E	A	E	K	S	2	0	1	0	0	1	3	0	0	0	1	1	0	0	1	0	1	0	0	1	0	12	0	1327.66	ACI34304.1	ACI34304.1	472	483	yes	yes	2	9.4999e-19	241.35	By MS/MS	By MS/MS	By MS/MS	By MS/MS	By MS/MS	By MS/MS	By MS/MS	By MS/MS
EATSQEELKPLFEK	HADLMQHKEATSQEEL	ELKPLFEKAKASH___	K	E	A	E	K	A	1	0	0	0	0	1	4	0	0	0	2	2	0	1	1	1	1	0	0	0	0	14	1	1647.84	NP_001133157.1;ACH70821.1	NP_001133157.1	382	395	yes	no	2	2.7924e-11	177.93	By matching	By matching	By matching	By matching	By matching	By matching	By matching	By MS/MS
EAVAMESFAK	LALRTPGKEAVAMESF	VAMESFAKALRMLPTI	K	E	A	A	K	A	3	0	0	0	0	0	2	0	0	0	0	1	1	1	0	1	0	0	0	1	0	10	0	1081.51	NP_001133605.1;ACI33559.1	NP_001133605.1	432	441	yes	no	2	0.042382	58.63	By MS/MS	By matching	By matching	By matching	By matching	By matching	By matching	By matching
EAVAQLVIK	DRELPGLREAVAQLVI	AVAQLVIKEHDVETPH	R	E	A	I	K	E	2	0	0	0	0	1	1	0	0	1	1	1	0	0	0	0	0	0	0	2	0	9	0	969.586	ACI34120.1	ACI34120.1	23	31	yes	yes	2	0.00023643	153.08	By MS/MS	By MS/MS	By MS/MS	By MS/MS	By MS/MS	By MS/MS	By MS/MS	By MS/MS
EAVELPLTHFELYK	DIQKQEVREAVELPLT	LTHFELYKQIGIDPPR	R	E	A	Y	K	Q	1	0	0	0	0	0	3	0	1	0	3	1	0	1	1	0	1	0	1	1	0	14	0	1687.88	NP_001140138.1;ACM09405.1	NP_001140138.1	179	192	yes	no	3	0.070185	35.523	By matching	By matching	By matching	By MS/MS	By matching	By matching	By MS/MS	By matching
EAVETITTDPLYYR	GETIKNIREAVETITT	TTDPLYYRPVAIALDT	R	E	A	Y	R	P	1	1	0	1	0	0	2	0	0	1	1	0	0	0	1	0	3	0	2	1	0	14	0	1669.82	ACN11437.1	ACN11437.1	88	101	yes	yes	2	0.012026	66.215	By matching	By matching	By matching	By matching	By matching	By matching	By MS/MS	By matching
EAVETITTDPLYYRPVAIALDTK	GETIKNIREAVETITT	VAIALDTKGPEIRTGL	R	E	A	T	K	G	3	1	0	2	0	0	2	0	0	2	2	1	0	0	2	0	4	0	2	2	0	23	1	2578.35	ACN11437.1	ACN11437.1	88	110	yes	yes	2;3	2.6381e-19	180.04	By MS/MS	By MS/MS	By MS/MS	By MS/MS	By MS/MS	By MS/MS	By MS/MS	By MS/MS
EAVIQAGEVAAEIK	RKNLDVMKEAVIQAGE	GEVAAEIKIKLAKKEK	K	E	A	I	K	I	4	0	0	0	0	1	3	1	0	2	0	1	0	0	0	0	0	0	0	2	0	14	0	1426.77	NP_001134028.1;ACN10991.1;ACI34338.1	NP_001134028.1	424	437	yes	no	2	1.5809e-08	169.98	By matching	By matching	By matching	By matching	By MS/MS	By matching	By matching	By matching
EAVLIDPVLETVDR	LLADTESREAVLIDPV	PVLETVDRDLKLVEEL	R	E	A	D	R	D	1	1	0	2	0	0	2	0	0	1	2	0	0	0	1	0	1	0	0	3	0	14	0	1567.85	ADM16190.1;ACI68458.1	ADM16190.1	84	97	yes	no	2	0.00011533	124.51	By matching	By MS/MS	By MS/MS	By MS/MS	By matching	By MS/MS	By matching	By MS/MS
EAVLLVFANK	MLQEDELREAVLLVFA	VLLVFANKQDLPNAMA	R	E	A	N	K	Q	2	0	1	0	0	0	1	0	0	0	2	1	0	1	0	0	0	0	0	2	0	10	0	1102.64	ACN11168.1;ACM09105.1;ACM08502.1;ACI33863.1;ACI33187.1;ACI69928.1;ACN12636.1;ACN10278.1;ACI68662.1;ACI33823.1	ACN12636.1	118	127	no	no	2	0.01684	77.533	By matching	By matching	By matching	By matching	By matching	By matching	By matching	By matching
EAYPGDVFYLHSR	LLRRPPGREAYPGDVF	DVFYLHSRLLERAAKM	R	E	A	S	R	L	1	1	0	1	0	0	1	1	1	0	1	0	0	1	1	1	0	0	2	1	0	13	0	1552.73	ACN10935.1;ACI33076.1;NP_001133132.1;ACH70752.1	ACN10935.1	335	347	no	no	2;3	7.2779e-11	188.48	By MS/MS	By MS/MS	By MS/MS	By MS/MS	By MS/MS	By MS/MS	By MS/MS	By MS/MS
ECADLWPR	AITGPVAKECADLWPR	ECADLWPRIASNAGSI	K	E	C	P	R	I	1	1	0	1	1	0	1	0	0	0	1	0	0	0	1	0	0	1	0	0	0	8	0	1045.47	ACN12393.1;ACN10046.1;NP_001134137.1;ACI66338.1	ACN12393.1	124	131	yes	no	2	0.022063	68.383	By MS/MS	By matching	By matching	By MS/MS	By matching	By matching	By MS/MS	By MS/MS
ECISMHVGQAGVQMGNACWELYCLEHGIQPDGQMPSDK	________________	DGQMPSDKTRGGGDDS	R	E	C	D	K	T	2	0	1	2	3	4	3	5	2	2	2	1	3	0	2	2	0	1	1	2	0	38	0	4331.86	NP_001167032.1;ACI33964.1;ACH71025.1;ACN10869.1	NP_001167032.1	3	40	yes	no	4	0.0035057	42.733	By matching	By matching	By matching	By MS/MS	By matching	By matching	By matching	By matching
ECISVHVGQAGVQMGNTCWELYCLEHGIQPDGTMPNNK	________________	DGTMPNNKAVGSTDDS	R	E	C	N	K	A	1	0	3	1	3	3	3	5	2	2	2	1	2	0	2	1	2	1	1	3	0	38	0	4328.92	NP_001133158.1;ACN10896.1;ACH70822.1	NP_001133158.1	3	40	yes	no	4	0.00033852	53.522	By matching	By matching	By matching	By matching	By matching	By matching	By matching	By matching
ECLPLIIFLR	STGPHKLRECLPLIIF	LPLIIFLRNRLKYALT	R	E	C	L	R	N	0	1	0	0	1	0	1	0	0	2	3	0	0	1	1	0	0	0	0	0	0	10	0	1272.73	ACH85370.1;ACI69116.1;ACI67685.1;ACH85337.1;AGH92536.1;ACN12200.1;ACN09853.1;ACI69349.1;ACI69831.1	ACH85370.1	36	45	no	no	2	3.2791e-11	160.59	By MS/MS	By MS/MS	By MS/MS	By MS/MS	By MS/MS	By MS/MS	By MS/MS	By MS/MS
ECPADECGAGVFMASHFDR	GKIHRLRRECPADECG	FMASHFDRHYCGKCCL	R	E	C	D	R	H	3	1	0	2	2	0	2	2	1	0	0	0	1	2	1	1	0	0	0	1	0	19	0	2154.86	ACM08345.1	ACM08345.1	120	138	yes	yes	3	0.00024593	91.592	By MS/MS	By MS/MS	By MS/MS	By MS/MS	By MS/MS	By MS/MS	By MS/MS	By MS/MS
ECVTYLESQTNK	ARVVAAVRECVTYLES	YLESQTNKLMFPCPYS	R	E	C	N	K	L	0	0	1	0	1	1	2	0	0	0	1	1	0	0	0	1	2	0	1	1	0	12	0	1470.67	NP_001134867.1;ACI69216.1	NP_001134867.1	230	241	yes	no	2	6.9875e-33	273.24	By MS/MS	By MS/MS	By MS/MS	By MS/MS	By MS/MS	By MS/MS	By MS/MS	By MS/MS
EDAELAVEHGVQGIIVSNHGGR	IIKGILTKEDAELAVE	IVSNHGGRQLDGGPAT	K	E	D	G	R	Q	2	1	1	1	0	1	3	4	2	2	1	0	0	0	0	1	0	0	0	3	0	22	0	2286.14	NP_001134549.1;ACI67966.1	NP_001134549.1	235	256	yes	no	3	1.1603e-46	261.06	By matching	By matching	By matching	By matching	By matching	By matching	By MS/MS	By MS/MS
EDAGKPEALAK	ELKRAVAREDAGKPEA	GKPEALAKVKKIFIGG	R	E	D	A	K	V	3	0	0	1	0	0	2	1	0	0	1	2	0	0	1	0	0	0	0	0	0	11	1	1127.58	ACI69665.1;ACI67644.1;ACI67551.1;ACN10703.1;ACI33973.1;CAG14940.1	ACI69665.1	87	97	no	no	2	7.499e-08	196.44	By MS/MS	By MS/MS	By MS/MS	By MS/MS	By MS/MS	By MS/MS	By matching	By matching
EDAGRPEALAK	ELKRAVAREDAGRPEA	GRPEALAKVKKIFIGG	R	E	D	A	K	V	3	1	0	1	0	0	2	1	0	0	1	1	0	0	1	0	0	0	0	0	0	11	1	1155.59	ACI32918.1;ACI33959.1	ACI32918.1	85	95	yes	no	2	0.00077248	136.81	By MS/MS	By matching	By MS/MS	By matching	By MS/MS	By MS/MS	By matching	By matching
EDAMQEGLK	TSDEVKRREDAMQEGL	DAMQEGLKQAVAVPLS	R	E	D	L	K	Q	1	0	0	1	0	1	2	1	0	0	1	1	1	0	0	0	0	0	0	0	0	9	0	1019.46	NP_001158793.1;ACN10483.1	NP_001158793.1	437	445	yes	no	2	0.00031268	150.27	By MS/MS	By MS/MS	By MS/MS	By matching	By matching	By matching	By matching	By MS/MS
EDEGIAYR	STDYGVLKEDEGIAYR	EDEGIAYRGLFIIDDK	K	E	D	Y	R	G	1	1	0	1	0	0	2	1	0	1	0	0	0	0	0	0	0	0	1	0	0	8	0	951.43	ACI67145.1;ACI68683.1;NP_001134858.1;ACI69176.1;ACI67901.1	ACI67145.1	121	128	yes	no	2	0.00071593	125.81	By matching	By matching	By MS/MS	By matching	By matching	By matching	By matching	By matching
EDFHEVFSGHGQIK	GNLDSVSREDFHEVFS	FSGHGQIKWIDFTRGA	R	E	D	I	K	W	0	0	0	1	0	1	2	2	2	1	0	1	0	2	0	1	0	0	0	1	0	14	0	1628.76	NP_001167237.1;ACN11166.1	NP_001167237.1	244	257	yes	no	3	0.013946	63.602	By matching	By matching	By matching	By matching	By MS/MS	By MS/MS	By matching	By MS/MS
EDFHPMEIPADATLLGQVILGSSSGPGQGLLVNTWYGER	CKKERLKKEDFHPMEI	VNTWYGERATPTGGKD	K	E	D	E	R	A	2	1	1	2	0	2	3	6	1	2	5	0	1	1	3	3	2	1	1	2	0	39	0	4154.04	ACN12226.1;ACN10848.1;ACN09879.1;ACI67050.1;ACI66363.1;ACI68689.1	ACN12226.1	98	136	yes	no	3;4;5	1.8624e-21	133.23	By MS/MS	By MS/MS	By MS/MS	By MS/MS	By MS/MS	By MS/MS	By MS/MS	By MS/MS
EDFMSFDYILCMDESNLSDLK	HVARQVTKEDFMSFDY	ESNLSDLKKKANSVKN	K	E	D	L	K	K	0	0	1	4	1	0	2	0	0	1	3	1	2	2	0	3	0	0	1	0	0	21	0	2571.09	ACI68303.1;ACI67726.1;ACI66835.1;ACI68618.1	ACI68303.1	81	101	yes	no	2	5.5429e-13	175.56	By MS/MS	By MS/MS	By matching	By MS/MS	By MS/MS	By MS/MS	By MS/MS	By matching
EDGGGWWYNR	DPRKQCSKEDGGGWWY	GGGWWYNRCHAANPNG	K	E	D	N	R	C	0	1	1	1	0	0	1	3	0	0	0	0	0	0	0	0	0	2	1	0	0	10	0	1238.51	CON__P02676	CON__P02676	431	440	yes	yes	2	0.00071389	117.53	By matching	By matching	By matching	By MS/MS	By matching	By matching	By matching	By MS/MS
EDGVTPFFVFFK	AIGLLDYREDGVTPFF	TPFFVFFKDGIEIEKY	R	E	D	F	K	D	0	0	0	1	0	0	1	1	0	0	0	1	0	4	1	0	1	0	0	2	0	12	0	1431.71	AGH92632.1;ADM16179.1;ACM08327.1;ACI68686.1;ACI68306.1;ACI67791.1	AGH92632.1	152	163	yes	no	2	6.405e-07	163.9	By MS/MS	By MS/MS	By MS/MS	By MS/MS	By MS/MS	By MS/MS	By MS/MS	By MS/MS
EDIFYCGK	IADGTVKREDIFYCGK	EDIFYCGKLWNTFHPP	R	E	D	G	K	L	0	0	0	1	1	0	1	1	0	1	0	1	0	1	0	0	0	0	1	0	0	8	0	1030.44	NP_001139958.1;ACM08888.1	NP_001139958.1	80	87	yes	no	2	0.0075956	84.498	By matching	By matching	By MS/MS	By MS/MS	By matching	By matching	By MS/MS	By MS/MS
EDIPVFDLLLLGMGPDGHTCSLFPDHPLLEETQK	KLKEAFPKEDIPVFDL	PLLEETQKIVAPISDS	K	E	D	Q	K	I	0	0	0	4	1	1	3	3	2	1	7	1	1	2	4	1	2	0	0	1	0	34	0	3832.87	NP_001140068.1;ACM09477.1	NP_001140068.1	129	162	yes	no	4	0.064842	18.405	By matching	By matching	By matching	By matching	By matching	By matching	By MS/MS	By matching
EDKYEEEIK	SEDKYSQKEDKYEEEI	DKYEEEIKILSDKLKE	K	E	D	I	K	I	0	0	0	1	0	0	4	0	0	1	0	2	0	0	0	0	0	0	1	0	0	9	1	1181.55	ACN10639.1;NP_001133629.1;ACN10541.1;ACI33603.1;ACI34179.1;NP_001117128.1;AGH92584.1;AGH92520.1;AAB36559.1;NP_001136186.1;ACN10871.1;ACI34151.1;CON__Q3SX28;ACI33276.1;ACM08443.1	ACN10639.1	180	188	no	no	2	0.0029147	106.88	By matching	By matching	By MS/MS	By matching	By matching	By matching	By matching	By matching
EDLRVPDSDLGK	MGDNGDVREDLRVPDS	VPDSDLGKEIEQKFAA	R	E	D	G	K	E	0	1	0	3	0	0	1	1	0	0	2	1	0	0	1	1	0	0	0	1	0	12	1	1342.67	NP_001265971.1;ACI34012.1;ACH70927.1;ACM08851.1;ACM08204.1	ACM08851.1	111	122	no	no	2	0.00023837	137.4	By MS/MS	By MS/MS	By MS/MS	By MS/MS	By MS/MS	By MS/MS	By MS/MS	By MS/MS
EDLVFIFWAPDGAPLK	YETKETKKEDLVFIFW	APDGAPLKSKMIYASS	K	E	D	L	K	S	2	0	0	2	0	0	1	1	0	1	2	1	0	2	2	0	0	1	0	1	0	16	0	1816.94	ADM16311.1;ACI68395.1;ACM09748.1;AGH92581.1;ACN12515.1;ACN10162.1;ACM08369.1	ADM16311.1	98	113	no	no	2	5.306e-05	128.06	By matching	By matching	By matching	By MS/MS	By MS/MS	By MS/MS	By matching	By matching
EDLVFIFWAPEGAPLK	YETKETKKEDLVFIFW	APEGAPLKSKMIYASS	K	E	D	L	K	S	2	0	0	1	0	0	2	1	0	1	2	1	0	2	2	0	0	1	0	1	0	16	0	1830.96	ACI68104.1;ACN12581.1;ACN10226.1;ACI67300.1;NP_001133173.1;ACH70885.1	ACI68104.1	98	113	yes	no	2	9.0335e-06	134.14	By MS/MS	By MS/MS	By matching	By MS/MS	By MS/MS	By MS/MS	By MS/MS	By MS/MS
EDLYLKPIQR	PNFTPGKKEDLYLKPI	LYLKPIQRTILMMGRY	K	E	D	Q	R	T	0	1	0	1	0	1	1	0	0	1	2	1	0	0	1	0	0	0	1	0	0	10	1	1273.7	ACN11358.1;ACN58670.1;NP_001133466.1;ACI33293.1	NP_001133466.1	440	449	no	no	2	0.00091944	149.57	By MS/MS	By MS/MS	By MS/MS	By MS/MS	By MS/MS	By MS/MS	By MS/MS	By MS/MS
EDPHIVPGISDK	PKEYAGTKEDPHIVPG	IVPGISDKRLVGCLCE	K	E	D	D	K	R	0	0	0	2	0	0	1	1	1	2	0	1	0	0	2	1	0	0	0	1	0	12	0	1305.66	ACI68884.1;ACH70877.1	ACI68884.1	73	84	yes	no	2	0.0013382	98.902	By matching	By matching	By matching	By matching	By matching	By matching	By MS/MS	By MS/MS
EDQTEYVEEK	TKVILHMKEDQTEYVE	QTEYVEEKRVKEVVKK	K	E	D	E	K	R	0	0	0	1	0	1	4	0	0	0	0	1	0	0	0	0	1	0	1	1	0	10	0	1268.54	NP_001117004.1;AGT57169.1;AAD30275.1;ACH70738.1;AGT57170.1	NP_001117004.1	186	195	no	no	2	0.00012292	149.94	By matching	By matching	By MS/MS	By matching	By matching	By matching	By matching	By matching
EDSNRPGAHLTVK	EPKRAVSREDSNRPGA	PGAHLTVKKIFVGGIK	R	E	D	V	K	K	1	1	1	1	0	0	1	1	1	0	1	1	0	0	1	1	1	0	0	1	0	13	1	1422.72	NP_001134615.1;ACI68197.1	NP_001134615.1	92	104	yes	no	2;3	0.00029589	130.56	By matching	By matching	By matching	By matching	By matching	By MS/MS	By matching	By MS/MS
EDSSRPGAHVTVK	EPKRAVSREDSSRPGA	PGAHVTVKKIFVGGIK	R	E	D	V	K	K	1	1	0	1	0	0	1	1	1	0	0	1	0	0	1	2	1	0	0	2	0	13	1	1381.69	ACN12767.1;ACN10402.1;NP_001134235.1;ADM16122.1;ACI66723.1	ACN12767.1	92	104	yes	no	2;3	7.5704e-07	169.09	By MS/MS	By MS/MS	By MS/MS	By MS/MS	By MS/MS	By MS/MS	By MS/MS	By MS/MS
EDVFVHQTAIK	FINRNDTKEDVFVHQT	FVHQTAIKKNNPRKFL	K	E	D	I	K	K	1	0	0	1	0	1	1	0	1	1	0	1	0	1	0	0	1	0	0	2	0	11	0	1285.67	NP_001133543.1;ACI33443.1;ACI70159.1;ACI68559.1;ADM15905.1;ACI69292.1;ADM16105.1;ACN12509.1;ACN11264.1;ACN10157.1;ACM09812.1;ACI67036.1;ACH71032.1;NP_001133216.1;ACH71033.1	NP_001133543.1	53	63	no	no	2	1.2079e-11	215.04	By MS/MS	By MS/MS	By matching	By matching	By MS/MS	By MS/MS	By matching	By matching
EDVLSLLLPVMVDSK	LAYAGSNREDVLSLLL	LPVMVDSKSSMEVAGV	R	E	D	S	K	S	0	0	0	2	0	0	1	0	0	0	4	1	1	0	1	2	0	0	0	3	0	15	0	1656.9	NP_001158789.1;ACN10471.1	NP_001158789.1	485	499	yes	no	2	2.8722e-08	159.18	By MS/MS	By MS/MS	By MS/MS	By MS/MS	By MS/MS	By MS/MS	By MS/MS	By MS/MS
EEDLTSLIDDVLR	GEDSQPMKEEDLTSLI	SLIDDVLRDNDKNNDG	K	E	E	L	R	D	0	1	0	3	0	0	2	0	0	1	3	0	0	0	0	1	1	0	0	1	0	13	0	1516.76	NP_001134099.1;ACI66224.1	NP_001134099.1	120	132	yes	no	2	0.00080617	97.273	By MS/MS	By matching	By matching	By matching	By matching	By MS/MS	By MS/MS	By matching
EEDMGAGDQGLMFGYATDETEECMPLTIVLAHK	QGVHVDRKEEDMGAGD	LTIVLAHKLNSKMAEL	K	E	E	H	K	L	3	0	0	3	1	1	5	4	1	1	3	1	3	1	1	0	3	0	1	1	0	33	0	3657.6	ACI68808.1	ACI68808.1	120	152	yes	yes	3;4	3.5965e-32	187.54	By MS/MS	By MS/MS	By MS/MS	By MS/MS	By MS/MS	By MS/MS	By MS/MS	By MS/MS
EEGCTHLLVTTACGSLR	QANIWALREEGCTHLL	TTACGSLREEIQPGDI	R	E	E	L	R	E	1	1	0	0	2	0	2	2	1	0	3	0	0	0	0	1	3	0	0	1	0	17	0	1902.89	NP_001133619.1;ACI33586.1;ACI66112.1	NP_001133619.1	94	110	yes	no	3	0.0019274	83.54	By matching	By matching	By matching	By MS/MS	By matching	By MS/MS	By MS/MS	By MS/MS
EEGTPYVGVLYAGLMLTK	QKTVDGMKEEGTPYVG	YAGLMLTKQGPKVLEF	K	E	E	T	K	Q	1	0	0	0	0	0	2	3	0	0	3	1	1	0	1	0	2	0	2	2	0	18	0	1940	ACN10564.1	ACN10564.1	264	281	yes	yes	2	0.00024571	103.88	By matching	By matching	By matching	By matching	By matching	By matching	By matching	By matching
EEIFGPVMQILK	QDGMTIAREEIFGPVM	GPVMQILKFKTLEEVV	R	E	E	L	K	F	0	0	0	0	0	1	2	1	0	2	1	1	1	1	1	0	0	0	0	1	0	12	0	1402.75	ACI33614.1	ACI33614.1	416	427	yes	yes	2	3.8908e-24	244.01	By MS/MS	By MS/MS	By MS/MS	By MS/MS	By MS/MS	By MS/MS	By MS/MS	By MS/MS
EEIFGPVMSVMPFDTEEEVLK	TDDMTCVKEEIFGPVM	DTEEEVLKRANNTTFG	K	E	E	L	K	R	0	0	0	1	0	0	5	1	0	1	1	1	2	2	2	1	1	0	0	3	0	21	0	2425.14	NP_001133574.1;ACN10881.1;ACI33507.1	NP_001133574.1	400	420	yes	no	2;3	1.2282e-08	142.88	By MS/MS	By MS/MS	By MS/MS	By MS/MS	By MS/MS	By MS/MS	By MS/MS	By MS/MS
EEIFGPVMSVMPFDTEEEVLKR	TDDMTCVKEEIFGPVM	TEEEVLKRANNTTFGL	K	E	E	K	R	A	0	1	0	1	0	0	5	1	0	1	1	1	2	2	2	1	1	0	0	3	0	22	1	2581.24	NP_001133574.1;ACN10881.1;ACI33507.1	NP_001133574.1	400	421	yes	no	3	0.0039895	60.764	By matching	By matching	By MS/MS	By MS/MS	By matching	By matching	By matching	By MS/MS
EEIQPGDIVIIDQFIDR	TTACGSLREEIQPGDI	IIDQFIDRTTKRAQTL	R	E	E	D	R	T	0	1	0	3	0	2	2	1	0	5	0	0	0	1	1	0	0	0	0	1	0	17	0	1999.03	NP_001133619.1;ACI33586.1;ACI66112.1	NP_001133619.1	111	127	yes	no	2	2.0752e-27	221.47	By MS/MS	By MS/MS	By MS/MS	By MS/MS	By MS/MS	By MS/MS	By MS/MS	By MS/MS
EEISNNHDLIATYR	LIGHLFGKEEISNNHD	HDLIATYRHHIMNDMN	K	E	E	Y	R	H	1	1	2	1	0	0	2	0	1	2	1	0	0	0	0	1	1	0	1	0	0	14	0	1673.8	ACI33423.1;ACI34120.1	ACI34120.1	193	206	no	no	2;3	6.0448e-26	238.88	By MS/MS	By MS/MS	By MS/MS	By MS/MS	By MS/MS	By MS/MS	By MS/MS	By MS/MS
EEIVPVAAAYDR	ELARKFSREEIVPVAA	PVAAAYDRSGEYPFPI	R	E	E	D	R	S	3	1	0	1	0	0	2	0	0	1	0	0	0	0	1	0	0	0	1	2	0	12	0	1331.67	NP_001133108.1;ACN10798.1;ACH70703.1;ADM15927.1;ACI70165.1;ACI66736.1	NP_001133108.1	59	70	yes	no	2	0.00010833	119.39	By MS/MS	By MS/MS	By MS/MS	By MS/MS	By MS/MS	By MS/MS	By MS/MS	By MS/MS
EEIVYLPCIYR	LDAMKGPREEIVYLPC	VYLPCIYRNTGIQKPD	R	E	E	Y	R	N	0	1	0	0	1	0	2	0	0	2	1	0	0	0	1	0	0	0	2	1	0	11	0	1453.73	NP_001133645.1;ACI33628.1	NP_001133645.1	24	34	yes	no	2	0.00012424	133.81	By MS/MS	By MS/MS	By MS/MS	By MS/MS	By MS/MS	By MS/MS	By MS/MS	By MS/MS
EELEDVIKDI	KTFHMYSKEELEDVIK	LEDVIKDI________	K	E	E	D	I	-	0	0	0	2	0	0	3	0	0	2	1	1	0	0	0	0	0	0	0	1	0	10	1	1201.61	NP_001134432.1;ADM16120.1;ACI67478.1	NP_001134432.1	232	241	yes	no	2	0.0012732	139.86	By matching	By MS/MS	By MS/MS	By matching	By MS/MS	By MS/MS	By MS/MS	By matching
EELGDEWLSPHLFR	LVWLTLMKEELGDEWL	WLSPHLFRLGASSLLA	K	E	E	F	R	L	0	1	0	1	0	0	3	1	1	0	3	0	0	1	1	1	0	1	0	0	0	14	0	1726.83	NP_001133307.1;ACI33005.1	NP_001133307.1	274	287	yes	no	2;3	0.00061957	101.53	By MS/MS	By MS/MS	By matching	By MS/MS	By MS/MS	By MS/MS	By MS/MS	By matching
EELHEYR	LQETNAVREELHEYRK	REELHEYRKAGGGTIV	R	E	E	Y	R	K	0	1	0	0	0	0	3	0	1	0	1	0	0	0	0	0	0	0	1	0	0	7	0	974.446	NP_001135294.1;B5X4Y9.1;ACI34370.1	NP_001135294.1	82	88	yes	no	2	0.0079154	86.472	By matching	By matching	By MS/MS	By matching	By matching	By matching	By matching	By matching
EELSNVLAAMR	HIRAKRKREELSNVLA	SNVLAAMRKAAAKKD_	R	E	E	M	R	K	2	1	1	0	0	0	2	0	0	0	2	0	1	0	0	1	0	0	0	1	0	11	0	1231.62	ACI69644.1;ACI68742.1;ACN12346.1;ACN09999.1;ACI66199.1;ACI68713.1	ACI69644.1	88	98	no	no	2	3.1132e-11	206.97	By MS/MS	By MS/MS	By MS/MS	By MS/MS	By MS/MS	By MS/MS	By MS/MS	By MS/MS
EELYQNLSK	DAKPYVTKEELYQNLS	ELYQNLSKEQADYCIS	K	E	E	S	K	E	0	0	1	0	0	1	2	0	0	0	2	1	0	0	0	1	0	0	1	0	0	9	0	1122.56	ACN58737.1	ACN58737.1	503	511	yes	yes	2	0.019897	66.19	By MS/MS	By matching	By matching	By matching	By MS/MS	By MS/MS	By matching	By matching
EENLDMHQMLDQTLMELNNM	EEKLAHAKEENLDMHQ	TLMELNNM________	K	E	E	N	M	-	0	0	3	2	0	2	3	0	1	0	4	0	4	0	0	0	1	0	0	0	0	20	0	2448.04	ACI34179.1	ACI34179.1	265	284	no	no	2	0.00014407	99.011	By matching	By MS/MS	By matching	By matching	By matching	By matching	By matching	By matching
EENLDMHQTLDQTLLELNNL	EEKLATAKEENLDMHQ	TLLELNNL________	K	E	E	N	L	-	0	0	3	2	0	2	3	0	1	0	6	0	1	0	0	0	2	0	0	0	0	20	0	2382.14	ACI33276.1	ACI33276.1	265	284	yes	yes	2;3	6.5015e-31	230.48	By MS/MS	By MS/MS	By MS/MS	By MS/MS	By MS/MS	By MS/MS	By MS/MS	By MS/MS
EENLGMHQVLDQTLQELNSL	EEKLAGAKEENLGMHQ	TLQELNSL________	K	E	E	S	L	-	0	0	2	1	0	3	3	1	1	0	5	0	1	0	0	1	1	0	0	1	0	20	0	2310.12	NP_001133629.1;ACN10541.1;ACI33603.1	NP_001133629.1	229	248	yes	no	2	0.0030883	70.944	By matching	By MS/MS	By matching	By matching	By matching	By matching	By matching	By matching
EENVNIHATLDK	EDALANAKEENVNIHA	NIHATLDKTLEDLNSF	K	E	E	D	K	T	1	0	2	1	0	0	2	0	1	1	1	1	0	0	0	0	1	0	0	1	0	12	0	1381.68	ACN10639.1	ACN10639.1	227	238	yes	yes	2;3	6.078e-06	151.55	By MS/MS	By matching	By matching	By matching	By MS/MS	By matching	By matching	By matching
EEPFFPLPEGYTFIQNVPLENR	IEFNFGQKEEPFFPLP	QNVPLENRIRGTVGPA	K	E	E	N	R	I	0	1	2	0	0	1	4	1	0	1	2	0	0	3	4	0	1	0	1	1	0	22	0	2635.3	NP_001167405.1;ACN10908.1	NP_001167405.1	469	490	yes	no	3	0.00089412	65.887	By matching	By matching	By matching	By matching	By matching	By MS/MS	By matching	By MS/MS
EEPVTPQGSLPDLQGFMFLR	CFQVNGTKEEPVTPQG	LQGFMFLRMEYYGGVL	K	E	E	L	R	M	0	1	0	1	0	2	2	2	0	0	3	0	1	2	3	1	1	0	0	1	0	20	0	2260.12	ACI34170.1;ACH85279.1	ACI34170.1	108	127	yes	no	2	1.8802e-06	123.55	By matching	By matching	By matching	By matching	By matching	By matching	By matching	By matching
EEQVIALGPQVAEGENVFGVCHIFASFNDTFVHVTDLSGK	PRKGKEKKEEQVIALG	HVTDLSGKETICRVTG	K	E	E	G	K	E	3	0	2	2	1	2	4	4	2	2	2	1	0	4	1	2	2	0	0	6	0	40	0	4360.11	NP_001134254.1;NP_001133208.1;ACN12165.1;ACN09818.1;ACI66811.1;ACH70996.1;ACH70995.1;ACN12313.1;ACN09966.1	NP_001134254.1	11	50	yes	no	4	0.023187	32.888	By MS/MS	By MS/MS	By matching	By MS/MS	By matching	By MS/MS	By MS/MS	By MS/MS
EESLTKVETLYDFLEGR				E	E	G	R		0	1	0	1	0	0	4	1	0	0	3	1	0	1	0	1	2	0	1	1	0	17	1	2028.01		REV__NP_001133717.1			yes	no	4	0.078171	39.629	By matching	By matching	By matching	By matching	By matching	By matching	By MS/MS	By matching
EESYKPIVDYIDTQFENYLQEELK	GFGDQINKEESYKPIV	NYLQEELKIKRSLFNY	K	E	E	L	K	I	0	0	1	2	0	2	5	0	0	2	2	2	0	1	1	1	1	0	3	1	0	24	1	2992.42	NP_001167234.1;ACN11154.1	NP_001167234.1	112	135	yes	no	3	0.010388	44.878	By matching	By MS/MS	By matching	By matching	By matching	By matching	By matching	By matching
EEVDFYLGK	KVEGVYTREEVDFYLG	EVDFYLGKRCAYVYKA	R	E	E	G	K	R	0	0	0	1	0	0	2	1	0	0	1	1	0	1	0	0	0	0	1	1	0	9	0	1098.52	AGH92531.1;ACN12629.1;ACN12385.1;ACN12298.1;ACN10273.1;ACN10038.1;ACN09951.1	AGH92531.1	37	45	yes	no	2	0.0017974	105.52	By MS/MS	By MS/MS	By matching	By MS/MS	By MS/MS	By MS/MS	By MS/MS	By MS/MS
EEVDQAIQSAHAAYLK	CDMFPCGKEEVDQAIQ	SAHAAYLKWSKMAGME	K	E	E	L	K	W	4	0	0	1	0	2	2	0	1	1	1	1	0	0	0	1	0	0	1	1	0	16	0	1771.87	NP_001133574.1;ACN10881.1;ACI33507.1	NP_001133574.1	59	74	yes	no	2;3	2.3355e-43	265.64	By MS/MS	By MS/MS	By MS/MS	By MS/MS	By MS/MS	By MS/MS	By MS/MS	By MS/MS
EEVHNVLWNTAVVVSNSGSVLGK	VISPILEREEVHNVLW	NSGSVLGKTRKNHIPR	R	E	E	G	K	T	1	0	3	0	0	0	2	2	1	0	2	1	0	0	0	3	1	1	0	6	0	23	0	2437.26	NP_001140121.1;ACM08325.1	NP_001140121.1	170	192	yes	no	2;3	4.0926e-36	237.18	By MS/MS	By MS/MS	By MS/MS	By MS/MS	By MS/MS	By MS/MS	By MS/MS	By MS/MS
EFADSLGIPFLETSAK	VVDYTTAKEFADSLGI	PFLETSAKSATNVEQA	K	E	F	A	K	S	2	0	0	1	0	0	2	1	0	1	2	1	0	2	1	2	1	0	0	0	0	16	0	1723.87	ACN11413.1;ACN11075.1	ACN11413.1	138	153	yes	no	2	0.00011951	121.82	By matching	By matching	By MS/MS	By matching	By MS/MS	By MS/MS	By MS/MS	By MS/MS
EFGATELVNPK	PDKFDKGKEFGATELV	ATELVNPKDHSKPIQE	K	E	F	P	K	D	1	0	1	0	0	0	2	1	0	0	1	1	0	1	1	0	1	0	0	1	0	11	0	1203.61	ACN62250.1;ACN12592.1;ACN10237.1;NP_001134493.1;ACI67747.1	ACN62250.1	236	246	yes	no	2	5.1743e-05	146.71	By MS/MS	By MS/MS	By MS/MS	By MS/MS	By MS/MS	By MS/MS	By MS/MS	By MS/MS
EFGWSLNYGAIALMWR	MLLRQAAKEFGWSLNY	GAIALMWRGGCIIRSV	K	E	F	W	R	G	2	1	1	0	0	0	1	2	0	1	2	0	1	1	0	1	0	2	1	0	0	16	0	1912.93	ACN10812.1	ACN10812.1	348	363	yes	yes	2	6.306e-09	168.93	By MS/MS	By MS/MS	By matching	By matching	By MS/MS	By matching	By matching	By matching
EFHLNESGDPSSK	FENKILSKEFHLNESG	ESGDPSSKSTEIKWKA	K	E	F	S	K	S	0	0	1	1	0	0	2	1	1	0	1	1	0	1	1	3	0	0	0	0	0	13	0	1445.64	ACH70631.1;NP_001139879.1;ACM08456.1	ACH70631.1	141	153	yes	no	2	2.5151e-20	228.17	By MS/MS	By MS/MS	By MS/MS	By MS/MS	By MS/MS	By MS/MS	By MS/MS	By MS/MS
EFITCLQNHPEHM	CFHGHPVKEFITCLQN	LQNHPEHM________	K	E	F	H	M	-	0	0	1	0	1	1	2	0	2	1	1	0	1	1	1	0	1	0	0	0	0	13	0	1654.72	NP_001117111.1;ACH70721.1;AAK07737.1	NP_001117111.1	338	350	yes	no	2;3	3.0797e-11	194.06	By matching	By MS/MS	By MS/MS	By matching	By MS/MS	By MS/MS	By MS/MS	By MS/MS
EFLDIWDVNMLR	PRGPPPLREFLDIWDV	IWDVNMLRKPDEVNKR	R	E	F	L	R	K	0	1	1	2	0	0	1	0	0	1	2	0	1	1	0	0	0	1	0	1	0	12	0	1549.76	NP_001167116.1;ACN10868.1	NP_001167116.1	52	63	yes	no	2	6.9391e-09	178.95	By matching	By matching	By matching	By matching	By MS/MS	By matching	By matching	By matching
EFLLIFR	LDNKLSFREFLLIFRK	REFLLIFRKSAAGELA	R	E	F	F	R	K	0	1	0	0	0	0	1	0	0	1	2	0	0	2	0	0	0	0	0	0	0	7	0	936.543	NP_001167374.1;ACN11503.1;NP_001139926.1;ACM08726.1	NP_001167374.1	148	154	yes	no	2	0.02027	76.035	By matching	By matching	By matching	By matching	By matching	By matching	By matching	By matching
EFLLPSIMGDK	FGSTELKKEFLLPSIM	LPSIMGDKVACLGVSE	K	E	F	D	K	V	0	0	0	1	0	0	1	1	0	1	2	1	1	1	1	1	0	0	0	0	0	11	0	1248.64	NP_001135191.1;ACI33082.1	NP_001135191.1	154	164	yes	no	2	0.010588	77.288	By MS/MS	By MS/MS	By MS/MS	By matching	By MS/MS	By MS/MS	By matching	By matching
EFNAEVHR	PGYDAESKEFNAEVHR	EFNAEVHRKHIMGVNV	K	E	F	H	R	K	1	1	1	0	0	0	2	0	1	0	0	0	0	1	0	0	0	0	0	1	0	8	0	1000.47	ACI67410.1;ACH70844.1;ACN12677.1;ACN10317.1;ACI66198.1	ACI67410.1	189	196	yes	no	2	0.00053805	131.22	By MS/MS	By MS/MS	By MS/MS	By MS/MS	By MS/MS	By MS/MS	By MS/MS	By MS/MS
EFNHINLELSLLGK	GPRGVLRREFNHINLE	LELSLLGKTHKKLRVD	R	E	F	G	K	T	0	0	2	0	0	0	2	1	1	1	4	1	0	1	0	1	0	0	0	0	0	14	0	1625.88	NP_001133089.1;ADM16080.1;ADM15976.1;ACN12697.1;ACN12283.1;ACN10337.1;ACN09936.1;ACI69823.1;ACI69224.1;ACI68432.1;ACI66278.1;ACH70676.1	NP_001133089.1	37	50	yes	no	2;3	1.6359e-25	233.28	By MS/MS	By MS/MS	By matching	By MS/MS	By matching	By MS/MS	By MS/MS	By MS/MS
EFPEASFDVVYSR	EVADATKREFPEASFD	SFDVVYSRDTILHIDE	R	E	F	S	R	D	1	1	0	1	0	0	2	0	0	0	0	0	0	2	1	2	0	0	1	2	0	13	0	1544.71	NP_001167350.1;ACN11445.1	NP_001167350.1	347	359	yes	no	2	1.7787e-07	164.22	By MS/MS	By MS/MS	By MS/MS	By MS/MS	By MS/MS	By MS/MS	By MS/MS	By MS/MS
EFSNLAFLTVK	QQVGGFVKEFSNLAFL	NLAFLTVKGSGHMVPT	K	E	F	V	K	G	1	0	1	0	0	0	1	0	0	0	2	1	0	2	0	1	1	0	0	1	0	11	0	1267.68	NP_001133654.1;ACI33646.1	NP_001133654.1	434	444	yes	no	2	0.0001855	128.85	By MS/MS	By MS/MS	By MS/MS	By MS/MS	By MS/MS	By MS/MS	By MS/MS	By MS/MS
EFSSEDIDHFILINNAASLGDVSR	ESVVRAAKEFSSEDID	ASLGDVSRYAQSFTNM	K	E	F	S	R	Y	2	1	2	3	0	0	2	1	1	3	2	0	0	2	0	4	0	0	0	1	0	24	0	2648.27	NP_001133746.1;ACI33827.1	NP_001133746.1	100	123	yes	no	2;3	6.0238e-21	190.79	By MS/MS	By MS/MS	By MS/MS	By MS/MS	By MS/MS	By MS/MS	By MS/MS	By MS/MS
EFSTCPLNSNDDVNK	AKIHIMPREFSTCPLN	NSNDDVNKWLKHFEVS	R	E	F	N	K	W	0	0	3	2	1	0	1	0	0	0	1	1	0	1	1	2	1	0	0	1	0	15	0	1738.75	NP_001134380.1;ACI67275.1;ACI67203.1;ACN12588.1;ACN10233.1	NP_001134380.1	226	240	no	no	2	6.4e-26	235.71	By MS/MS	By MS/MS	By MS/MS	By MS/MS	By MS/MS	By MS/MS	By MS/MS	By MS/MS
EFSVYMTK	EQVERLTKEFSVYMTK	EFSVYMTKDGRISMAG	K	E	F	T	K	D	0	0	0	0	0	0	1	0	0	0	0	1	1	1	0	1	1	0	1	1	0	8	0	1003.47	ACI34022.1;ACN58622.1;ACI33481.1;ACI33023.1	ACI34022.1	395	402	no	no	2	0.042177	59.931	By MS/MS	By matching	By matching	By matching	By matching	By matching	By matching	By matching
EFTEAVEMK	LTHLTFGKEFTEAVEM	FTEAVEMKQVAQQEAE	K	E	F	M	K	Q	1	0	0	0	0	0	3	0	0	0	0	1	1	1	0	0	1	0	0	1	0	9	0	1082.5	NP_001133602.1;ACI33553.1	NP_001133602.1	177	185	yes	no	2	0.0013352	113.71	By MS/MS	By MS/MS	By MS/MS	By MS/MS	By MS/MS	By MS/MS	By MS/MS	By matching
EFTSQNLGK	NNYCQNVKEFTSQNLG	FTSQNLGKLFMAEALQ	K	E	F	G	K	L	0	0	1	0	0	1	1	1	0	0	1	1	0	1	0	1	1	0	0	0	0	9	0	1022.5	B5RI54.1;ACH85295.1;ACM09059.1	B5RI54.1	324	332	yes	no	2	0.019307	66.962	By MS/MS	By MS/MS	By matching	By matching	By matching	By MS/MS	By matching	By matching
EFVAEPMGEK	SSTSQKHKEFVAEPMG	VAEPMGEKLVNALAGI	K	E	F	E	K	L	1	0	0	0	0	0	3	1	0	0	0	1	1	1	1	0	0	0	0	1	0	10	0	1135.52	AGH92524.1;ACM08201.1;ACI69661.1;ACI66267.1;ACI69910.1	AGH92524.1	10	19	yes	no	2	0.038221	60.064	By matching	By matching	By matching	By matching	By MS/MS	By matching	By matching	By matching
EFVDLLNLKPGMK	TGGPSTTKEFVDLLNL	LNLKPGMKVLDVGCGI	K	E	F	M	K	V	0	0	1	1	0	0	1	1	0	0	3	2	1	1	1	0	0	0	0	1	0	13	1	1502.82	NP_001167350.1;ACN11445.1	NP_001167350.1	276	288	yes	no	2;3	2.3164e-19	224.25	By MS/MS	By MS/MS	By MS/MS	By MS/MS	By MS/MS	By MS/MS	By MS/MS	By MS/MS
EGAAHAFAQYNMDQFTLAK	LNNDNLLREGAAHAFA	MDQFTLAKLEGYDDQV	R	E	G	A	K	L	5	0	1	1	0	2	1	1	1	0	1	1	1	2	0	0	1	0	1	0	0	19	0	2111.97	ACN10447.1	ACN10447.1	48	66	yes	yes	3	0.015153	56.424	By matching	By MS/MS	By matching	By matching	By MS/MS	By MS/MS	By matching	By matching
EGALCEENMR	AGFQWAVKEGALCEEN	ALCEENMRAVRFDVHD	K	E	G	M	R	A	1	1	1	0	1	0	3	1	0	0	1	0	1	0	0	0	0	0	0	0	0	10	0	1207.5	ACN11358.1;ACN58670.1;NP_001133466.1;ACI33293.1	NP_001133466.1	689	698	no	no	2	2.1296e-06	178.46	By matching	By matching	By MS/MS	By matching	By matching	By matching	By matching	By matching
EGASYVTFPQVASQLPSILAPSL	GEALLVQKEGASYVTF	PSILAPSL________	K	E	G	S	L	-	3	0	0	0	0	2	1	1	0	1	3	0	0	1	3	4	1	0	1	2	0	23	0	2374.24	NP_001135022.1;ACN12694.1;ACN10334.1;ACI69905.1	NP_001135022.1	248	270	yes	no	2	3.7829e-05	90.758	By MS/MS	By matching	By matching	By MS/MS	By MS/MS	By MS/MS	By MS/MS	By MS/MS
EGDVLTLLESER	RNVKGPVREGDVLTLL	LTLLESEREARRLR__	R	E	G	E	R	E	0	1	0	1	0	0	3	1	0	0	3	0	0	0	0	1	1	0	0	1	0	12	0	1359.69	ACN12320.1;ACN09973.1;ACI69457.1;ACI67673.1;ACN12301.1;ACN09954.1	ACN12320.1	52	63	yes	no	2	5.9797e-13	215.77	By MS/MS	By MS/MS	By MS/MS	By MS/MS	By MS/MS	By MS/MS	By MS/MS	By MS/MS
EGEMFLLPAR	KHKDVLIREGEMFLLP	EMFLLPARIPHSPQRL	R	E	G	A	R	I	1	1	0	0	0	0	2	1	0	0	2	0	1	1	1	0	0	0	0	0	0	10	0	1161.59	ADM16040.1;ACI69087.1;NP_001134951.1;ADM15971.1;ACI69619.1	ADM16040.1	82	91	yes	no	2	0.00018486	145.25	By MS/MS	By MS/MS	By MS/MS	By MS/MS	By MS/MS	By MS/MS	By MS/MS	By MS/MS
EGFITFIFNK	ANLTLKFKEGFITFIF	FITFIFNKNTTQNAVY	K	E	G	N	K	N	0	0	1	0	0	0	1	1	0	2	0	1	0	3	0	0	1	0	0	0	0	10	0	1214.63	NP_001158857.1;ACN10619.1	NP_001158857.1	214	223	yes	no	2	0.00066134	119.68	By MS/MS	By MS/MS	By matching	By matching	By MS/MS	By MS/MS	By MS/MS	By matching
EGFNQLLAAGFTDSFR	AGFTAEEREGFNQLLA	AGFTDSFRELYPEQAN	R	E	G	F	R	E	2	1	1	1	0	1	1	2	0	0	2	0	0	3	0	1	1	0	0	0	0	16	0	1771.85	NP_001135227.1;ACI33574.1;ACI33549.1;ACH70702.1	NP_001135227.1	233	248	yes	no	2	6.5229e-09	168.68	By MS/MS	By MS/MS	By MS/MS	By MS/MS	By MS/MS	By MS/MS	By MS/MS	By MS/MS
EGGGGGGGMDDIFSHIFGGGLFGFMGGQGR	RYGEQGLREGGGGGGG	GFMGGQGRSRNGGRRR	R	E	G	G	R	S	0	1	0	2	0	1	1	14	1	2	1	0	2	4	0	1	0	0	0	0	0	30	0	2873.26	ACN11426.1;ACM09839.1	ACN11426.1	76	105	yes	no	3	2.8489e-06	86.825	By MS/MS	By MS/MS	By matching	By MS/MS	By MS/MS	By MS/MS	By MS/MS	By MS/MS
EGGLGEAVLSAVGEEPGIMVTR	ITVEDHYREGGLGEAV	EPGIMVTRLAVNRIPR	R	E	G	T	R	L	2	1	0	0	0	0	4	5	0	1	2	0	1	0	1	1	1	0	0	3	0	22	0	2170.09	NP_001134006.1;ACI34298.1	NP_001134006.1	569	590	yes	no	2;3	1.2871e-35	231.39	By MS/MS	By MS/MS	By MS/MS	By MS/MS	By MS/MS	By MS/MS	By MS/MS	By MS/MS
EGGLGEAVLSAVGEEPGIVVTR	ITVEDHYREGGLGEAV	EPGIVVTRLAVNRIPR	R	E	G	T	R	L	2	1	0	0	0	0	4	5	0	1	2	0	0	0	1	1	1	0	0	4	0	22	0	2138.12	ACN60279.1	ACN60279.1	90	111	yes	yes	2;3	2.7466e-36	239.87	By MS/MS	By MS/MS	By MS/MS	By MS/MS	By MS/MS	By MS/MS	By MS/MS	By MS/MS
EGGLLTLSGAQAALTGTPGMLGYGMAK	HLATRHLREGGLLTLS	MLGYGMAKAAVHQLCQ	R	E	G	A	K	A	4	0	0	0	0	1	1	7	0	0	5	1	2	0	1	1	3	0	1	0	0	27	0	2564.3	NP_001134859.1;ACI69178.1	NP_001134859.1	124	150	yes	no	2;3	2.4358e-26	189.62	By MS/MS	By MS/MS	By MS/MS	By MS/MS	By MS/MS	By MS/MS	By MS/MS	By MS/MS
EGGVIINVSSMAAFLHSPYQPVYTATK	HMSKEYGKEGGVIINV	QPVYTATKHGVIGFSR	K	E	G	T	K	H	3	0	1	0	0	1	1	2	1	2	1	1	1	1	2	3	2	0	2	3	0	27	0	2879.45	ACM09410.1;ACM08802.1	ACM09410.1	129	155	yes	no	3	0.00075784	62.765	By matching	By MS/MS	By matching	By matching	By MS/MS	By matching	By matching	By MS/MS
EGGVQLLLTIVDTPGFGDAVDNSNCWQPVIDHIDSK	EQSKVLVKEGGVQLLL	VIDHIDSKFEDYLNSE	K	E	G	S	K	F	1	0	2	5	1	2	1	4	1	3	3	1	0	1	2	2	2	1	0	4	0	36	0	3908.89	NP_001133603.1;ACN11402.1;ACI33554.1	NP_001133603.1	99	134	yes	no	3	2.7023e-10	103.85	By matching	By matching	By matching	By MS/MS	By matching	By matching	By MS/MS	By matching
EGGVYELASFQMR	SKVDRPPKEGGVYELA	ELASFQMRPGGPAVWG	K	E	G	M	R	P	1	1	0	0	0	1	2	2	0	0	1	0	1	1	0	1	0	0	1	1	0	13	0	1485.69	NP_001134867.1;ACI69216.1	NP_001134867.1	147	159	yes	no	2	0.011926	93.766	By matching	By matching	By matching	By matching	By matching	By matching	By matching	By MS/MS
EGHPVTLLPAITLLSEGR	VLMREHEREGHPVTLL	ITLLSEGRFLTPEELD	R	E	G	G	R	F	1	1	0	0	0	0	2	2	1	1	4	0	0	0	2	1	2	0	0	1	0	18	0	1902.06	ACI33352.1;NP_001133374.1;ACI33108.1	ACI33352.1	306	323	yes	no	3	0.024378	52.862	By MS/MS	By MS/MS	By matching	By matching	By matching	By MS/MS	By matching	By MS/MS
EGIDPAPYYWYTDQR	ELLEGYKREGIDPAPY	YYWYTDQRKYGTCPHG	R	E	G	Q	R	K	1	1	0	2	0	1	1	1	0	1	0	0	0	0	2	0	1	1	3	0	0	15	0	1872.83	NP_001133698.1;ACI33721.1	NP_001133698.1	503	517	yes	no	2	6.2728e-19	216.27	By MS/MS	By MS/MS	By MS/MS	By MS/MS	By MS/MS	By MS/MS	By MS/MS	By MS/MS
EGIPALDNYLDK	TRKRKGLKEGIPALDN	ALDNYLDKL_______	K	E	G	D	K	L	1	0	1	2	0	0	1	1	0	1	2	1	0	0	1	0	0	0	1	0	0	12	0	1346.67	ACN11358.1;ACN58670.1;NP_001133466.1;ACI33293.1;ACN10751.1;ACN11125.1;ACN58590.1	NP_001133466.1	846	857	no	no	2	3.1533e-05	138.24	By MS/MS	By MS/MS	By MS/MS	By MS/MS	By MS/MS	By MS/MS	By MS/MS	By MS/MS
EGIPALDNYLDKL	TRKRKGLKEGIPALDN	LDNYLDKL________	K	E	G	K	L	-	1	0	1	2	0	0	1	1	0	1	3	1	0	0	1	0	0	0	1	0	0	13	1	1459.76	ACN11358.1;ACN58670.1;NP_001133466.1;ACI33293.1;ACN10751.1;ACN11125.1;ACN58590.1	NP_001133466.1	846	858	no	no	2	2.9879e-18	223.36	By MS/MS	By MS/MS	By MS/MS	By MS/MS	By MS/MS	By MS/MS	By MS/MS	By MS/MS
EGIYITEHICQTGLLSAVDMVEVNPK	VVGGLTYREGIYITEH	DMVEVNPKRGRTEDEI	R	E	G	P	K	R	1	0	1	1	1	1	3	2	1	3	2	1	1	0	1	1	2	0	1	3	0	26	0	2915.44	NP_001134788.1;ACI68882.1	NP_001134788.1	272	297	yes	no	3	0.05043	27.203	By matching	By MS/MS	By matching	By MS/MS	By matching	By matching	By MS/MS	By MS/MS
EGLANAAAVDK	IPPPAYVKEGLANAAA	ANAAAVDKLNQYTRGF	K	E	G	D	K	L	4	0	1	1	0	0	1	1	0	0	1	1	0	0	0	0	0	0	0	1	0	11	0	1057.54	NP_001133932.1;ACI34161.1	NP_001133932.1	79	89	yes	no	2	0.050022	60.157	By matching	By matching	By MS/MS	By matching	By matching	By matching	By matching	By matching
EGLELPEDEEEK	KTLVSVTKEGLELPED	LPEDEEEKKKMDEDKT	K	E	G	E	K	K	0	0	0	1	0	0	6	1	0	0	2	1	0	0	1	0	0	0	0	0	0	12	0	1415.63	NP_001117004.1;AGT57169.1;AAD30275.1;ACH70738.1;AGT57170.1	NP_001117004.1	536	547	no	no	2	0.00078199	98.898	By MS/MS	By matching	By MS/MS	By matching	By MS/MS	By matching	By matching	By matching
EGLLLWCQR	SVEETSAKEGLLLWCQ	GLLLWCQRKTAPYKNV	K	E	G	Q	R	K	0	1	0	0	1	1	1	1	0	0	3	0	0	0	0	0	0	1	0	0	0	9	0	1173.6	NP_001167055.1;ACN10704.1	NP_001167055.1	152	160	yes	no	2	0.00019934	155.07	By MS/MS	By MS/MS	By MS/MS	By MS/MS	By matching	By MS/MS	By MS/MS	By MS/MS
EGLQNIEAR	EPTNQQLKEGLQNIEA	GLQNIEARLAEKKMMN	K	E	G	A	R	L	1	1	1	0	0	1	2	1	0	1	1	0	0	0	0	0	0	0	0	0	0	9	0	1028.53	ACI32973.1;ACH70720.1	ACI32973.1	110	118	yes	no	2	0.027741	63.426	By matching	By matching	By matching	By matching	By MS/MS	By MS/MS	By MS/MS	By matching
EGLWMWSDGSR	VGGFDAVKEGLWMWSD	WMWSDGSRFDYTNWNT	K	E	G	S	R	F	0	1	0	1	0	0	1	2	0	0	1	0	1	0	0	2	0	2	0	0	0	11	0	1322.57	ACI69483.1	ACI69483.1	125	135	yes	yes	2	6.9299e-08	186.74	By matching	By MS/MS	By matching	By MS/MS	By MS/MS	By MS/MS	By matching	By MS/MS
EGMVMVDVR	DVGLSLVKEGMVMVDV	GMVMVDVRKEKHLQKM	K	E	G	V	R	K	0	1	0	1	0	0	1	1	0	0	0	0	2	0	0	0	0	0	0	3	0	9	0	1034.49	ACN60284.1	ACN60284.1	800	808	yes	yes	2	0.00084761	130.66	By matching	By matching	By matching	By MS/MS	By matching	By matching	By matching	By matching
EGNDLYHEMIESGVINLK	AGVGERTREGNDLYHE	ESGVINLKDDTSKVAL	R	E	G	L	K	D	0	0	2	1	0	0	3	2	1	2	2	1	1	0	0	1	0	0	1	1	0	18	0	2059.99	ACH85277.1	ACH85277.1	209	226	yes	yes	2;3	2.184e-75	314.11	By MS/MS	By MS/MS	By MS/MS	By MS/MS	By MS/MS	By MS/MS	By MS/MS	By MS/MS
EGNIFVTTTGCEDILLGK	TTMEEACKEGNIFVTT	CEDILLGKHFEHMKDD	K	E	G	G	K	H	0	0	1	1	1	0	2	3	0	2	2	1	0	1	0	0	3	0	0	1	0	18	0	1965.97	NP_001135793.1;NP_001133847.1;ACN10496.1;ACI34009.1;ACH70814.1	NP_001135793.1	269	286	yes	no	2	2.3857e-75	312.63	By MS/MS	By MS/MS	By MS/MS	By MS/MS	By MS/MS	By MS/MS	By MS/MS	By MS/MS
EGPFKPDHYR	AKYLGLPREGPFKPDH	PFKPDHYRY_______	R	E	G	Y	R	Y	0	1	0	1	0	0	1	1	1	0	0	1	0	1	2	0	0	0	1	0	0	10	1	1244.59	NP_001135793.1;NP_001133847.1;ACN10496.1;ACI34009.1;ACH70814.1	NP_001135793.1	423	432	yes	no	2	9.3546e-05	172.56	By MS/MS	By MS/MS	By MS/MS	By MS/MS	By MS/MS	By MS/MS	By matching	By matching
EGSQLKPQIQSTQMAIER	IATSITIKEGSQLKPQ	STQMAIERLLV_____	K	E	G	E	R	L	1	1	0	0	0	4	2	1	0	2	1	1	1	0	1	2	1	0	0	0	0	18	1	2043.04	ACI69124.1;ACI66501.1;ACI67639.1	ACI67639.1	108	125	no	no	2;3	4.2889e-09	173.34	By MS/MS	By MS/MS	By MS/MS	By MS/MS	By MS/MS	By MS/MS	By MS/MS	By MS/MS
EGTLLFVDISGQK	EGPVWEEKEGTLLFVD	FVDISGQKIHRWNSTT	K	E	G	Q	K	I	0	0	0	1	0	1	1	2	0	1	2	1	0	1	0	1	1	0	0	1	0	13	0	1405.75	NP_001134866.1;ACN12717.1;ACN10357.1;ACI69215.1	NP_001134866.1	25	37	yes	no	2	7.9168e-07	153.75	By MS/MS	By MS/MS	By MS/MS	By MS/MS	By matching	By MS/MS	By MS/MS	By MS/MS
EGTVTVTNDGATILK	KILIGGGREGTVTVTN	NDGATILKAIGVDNPA	R	E	G	L	K	A	1	0	1	1	0	0	1	2	0	1	1	1	0	0	0	0	4	0	0	2	0	15	0	1517.79	NP_001133605.1;ACI33559.1	NP_001133605.1	58	72	yes	no	2	1.9445e-08	164.66	By MS/MS	By MS/MS	By MS/MS	By MS/MS	By MS/MS	By MS/MS	By MS/MS	By MS/MS
EGVECEVVNLR	EATAVLAKEGVECEVV	ECEVVNLRTIRPLDVD	K	E	G	L	R	T	0	1	1	0	1	0	3	1	0	0	1	0	0	0	0	0	0	0	0	3	0	11	0	1302.62	ACI34116.1	ACI34116.1	290	300	yes	yes	2	3.4677e-08	192.44	By MS/MS	By matching	By MS/MS	By MS/MS	By MS/MS	By MS/MS	By MS/MS	By MS/MS
EGVHGGQLNK	ALVLVMGKEGVHGGQL	VHGGQLNKKAYTMADY	K	E	G	N	K	K	0	0	1	0	0	1	1	3	1	0	1	1	0	0	0	0	0	0	0	1	0	10	0	1037.53	ACM08604.1;ACI34313.1;ACN10854.1;ACI66182.1;ACI69044.2	ACM08604.1	116	125	no	no	2	0.0031164	87.806	By matching	By matching	By matching	By matching	By MS/MS	By matching	By matching	By matching
EGVLCEENMR	AGFQWAVKEGVLCEEN	VLCEENMRAVRFDIHD	K	E	G	M	R	A	0	1	1	0	1	0	3	1	0	0	1	0	1	0	0	0	0	0	0	1	0	10	0	1235.53	ACN10751.1;ACN11125.1;ACN58590.1	ACN10751.1	689	698	yes	no	2	2.0628e-05	169.99	By MS/MS	By MS/MS	By MS/MS	By MS/MS	By MS/MS	By MS/MS	By matching	By matching
EGVMYTINHK	LDALLLFREGVMYTIN	VMYTINHKNRTCKKER	R	E	G	H	K	N	0	0	1	0	0	0	1	1	1	1	0	1	1	0	0	0	1	0	1	1	0	10	0	1190.58	ACN12226.1;ACN10848.1;ACN09879.1;ACI67050.1;ACI66363.1;ACI68689.1;ACI68886.1;ACM09231.1	ACN12226.1	77	86	yes	no	2	3.0849e-14	230.06	By MS/MS	By MS/MS	By MS/MS	By MS/MS	By MS/MS	By matching	By MS/MS	By MS/MS
EGVMYTINHR	VDALLLFREGVMYTIN	VMYTINHRNKTCKKER	R	E	G	H	R	N	0	1	1	0	0	0	1	1	1	1	0	0	1	0	0	0	1	0	1	1	0	10	0	1218.58	ACN12507.1;ACN10155.1;ACM09309.1;ACM09141.1;ACM08537.1;ACI33774.1;ACM08944.1	ACN12507.1	77	86	yes	no	2	0.00039961	130.41	By matching	By MS/MS	By MS/MS	By matching	By MS/MS	By matching	By MS/MS	By MS/MS
EGVVECAYVR	VLDAMNGKEGVVECAY	VVECAYVRSEETECKY	K	E	G	V	R	S	1	1	0	0	1	0	2	1	0	0	0	0	0	0	0	0	0	0	1	3	0	10	0	1180.55	NP_001133198.1;ACI68017.1;ACH70949.1	NP_001133198.1	270	279	yes	no	2	0.00043637	128.91	By matching	By MS/MS	By matching	By MS/MS	By matching	By MS/MS	By matching	By matching
EGYSGVAMLCK	YWAGSDEKEGYSGVAM	SGVAMLCKTEPLKVTY	K	E	G	C	K	T	1	0	0	0	1	0	1	2	0	0	1	1	1	0	0	1	0	0	1	1	0	11	0	1213.55	NP_001135227.1;ACI33574.1;ACI33549.1;ACH70702.1	NP_001135227.1	121	131	yes	no	2	0.029128	62.633	By MS/MS	By matching	By MS/MS	By matching	By MS/MS	By matching	By matching	By MS/MS
EHALLAFTLGVK	ISKNGQTREHALLAFT	LAFTLGVKQLIVGVNK	R	E	H	V	K	Q	2	0	0	0	0	0	1	1	1	0	3	1	0	1	0	0	1	0	0	1	0	12	0	1297.74	NP_001117101.1;ACN12790.1;ACN10846.1;ACN10424.1;ACH70682.1;AAG38613.1	NP_001117101.1	135	146	yes	no	2	2.481e-07	171.49	By matching	By MS/MS	By matching	By MS/MS	By MS/MS	By MS/MS	By MS/MS	By MS/MS
EHALLAYTLGVK	ISKNGQTREHALLAYT	LAYTLGVKQLIVGVNK	R	E	H	V	K	Q	2	0	0	0	0	0	1	1	1	0	3	1	0	0	0	0	1	0	1	1	0	12	0	1313.73	NP_001167438.1;ACN11490.1;ACN11081.1;NP_001135381.1;ACH70684.1;ACN10642.1;ACN12744.1;ACN10382.1	ACN11081.1	135	146	no	no	2	2.2668e-12	203.51	By MS/MS	By MS/MS	By MS/MS	By MS/MS	By MS/MS	By MS/MS	By MS/MS	By MS/MS
EHDVETPHGR	AVAQLVIKEHDVETPH	DVETPHGRIHCTMKGV	K	E	H	G	R	I	0	1	0	1	0	0	2	1	2	0	0	0	0	0	1	0	1	0	0	1	0	10	0	1175.53	ACI33423.1;ACI34120.1	ACI34120.1	32	41	no	no	2	0.00024768	140.49	By matching	By MS/MS	By MS/MS	By matching	By MS/MS	By matching	By matching	By matching
EHDYPEWEGGVNK	GSHHGTLKEHDYPEWE	EWEGGVNKMYHGVRDH	K	E	H	N	K	M	0	0	1	1	0	0	3	2	1	0	0	1	0	0	1	0	0	1	1	1	0	13	0	1558.67	NP_001133683.1;ACI33694.1	NP_001133683.1	214	226	yes	no	2	2.4094e-05	134.99	By MS/MS	By matching	By matching	By matching	By matching	By matching	By matching	By matching
EHDYYTPTGEFR	TDTGKHIKEHDYYTPT	YTPTGEFRVDREGSPV	K	E	H	F	R	V	0	1	0	1	0	0	2	1	1	0	0	0	0	1	1	0	2	0	2	0	0	12	0	1513.65	NP_001135197.1;ACI33169.1;ACN10714.1	NP_001135197.1	614	625	yes	no	2	0.0007818	98.902	By matching	By matching	By matching	By matching	By matching	By matching	By matching	By matching
EHIIEALR	VRTKASNKEHIIEALR	EHIIEALRRAKFKFPG	K	E	H	L	R	R	1	1	0	0	0	0	2	0	1	2	1	0	0	0	0	0	0	0	0	0	0	8	0	979.545	NP_001134152.1;ACN12558.1;ACN12248.1;ACN10204.1;ACN09901.1;ACI67802.1;ACI67691.1;ACI67024.1;ACI66403.1;ACN12377.1;ACN10030.1;ACI67100.1;ACI68991.1	NP_001134152.1	146	153	yes	no	2	9.2511e-06	179.21	By MS/MS	By MS/MS	By MS/MS	By MS/MS	By MS/MS	By MS/MS	By MS/MS	By MS/MS
EHIMEHLEGVIDKPESDMSPQELQLHYFK	DKNMVHDREHIMEHLE	ELQLHYFKMHDYDGNN	R	E	H	F	K	M	0	0	0	2	0	2	5	1	3	2	3	2	2	1	2	2	0	0	1	1	0	29	1	3478.65	NP_001134099.1;ACI66224.1	NP_001134099.1	56	84	yes	no	3;4;5	1.1662e-07	94.838	By matching	By MS/MS	By matching	By MS/MS	By matching	By MS/MS	By MS/MS	By MS/MS
EHLPPASNDVLIVMCGPPPMIQHACLPNLSTLGYK	FVNANMMKEHLPPASN	NLSTLGYKTENTFTY_	K	E	H	Y	K	T	2	0	2	1	2	1	1	2	2	2	5	1	2	0	6	2	1	0	1	2	0	35	0	3868.91	ACM08211.1	ACM08211.1	263	297	yes	yes	4	0.00082281	44.721	By matching	By matching	By matching	By MS/MS	By matching	By matching	By matching	By matching
EHLVYQAK	________________	EHLVYQAKLAEQAERY	R	E	H	A	K	L	1	0	0	0	0	1	1	0	1	0	1	1	0	0	0	0	0	0	1	1	0	8	0	986.519	ACI34249.1	ACI34249.1	5	12	yes	yes	2	0.00047826	125.31	By MS/MS	By MS/MS	By MS/MS	By MS/MS	By MS/MS	By matching	By MS/MS	By MS/MS
EHPWEVMPDLYFYR	RMRGTISREHPWEVMP	MPDLYFYRDPEEIEKE	R	E	H	Y	R	D	0	1	0	1	0	0	2	0	1	0	1	0	1	1	2	0	0	1	2	1	0	14	0	1880.86	NP_001134397.1;B5DGB6.1;ACI70158.1;ACI68951.1;ACI67366.1;ACH70790.1;ADM15997.1;ACN12502.1;ACN10151.1;ACI68848.1	NP_001134397.1	192	205	yes	no	2;3	1.5349e-05	135.04	By MS/MS	By MS/MS	By matching	By MS/MS	By MS/MS	By MS/MS	By MS/MS	By MS/MS
EHPWEVMPDLYFYRDPEEIEK	RMRGTISREHPWEVMP	RDPEEIEKEEQAAAEK	R	E	H	E	K	E	0	1	0	2	0	0	5	0	1	1	1	1	1	1	3	0	0	1	2	1	0	21	1	2721.24	NP_001134397.1;B5DGB6.1;ACI70158.1;ACI68951.1;ACI67366.1;ACH70790.1;ADM15997.1;ACN12502.1;ACN10151.1;ACI68848.1	NP_001134397.1	192	212	yes	no	3	0.022641	44.468	By matching	By matching	By matching	By matching	By matching	By MS/MS	By matching	By matching
EHPWEVMPDLYFYRDPEEIEKEEQAAAEK	RMRGTISREHPWEVMP	EEQAAAEKAVGKEEFQ	R	E	H	E	K	A	3	1	0	2	0	1	8	0	1	1	1	2	1	1	3	0	0	1	2	1	0	29	2	3577.63	NP_001134397.1;B5DGB6.1;ACI70158.1;ACI68951.1;ACI67366.1;ACH70790.1;ADM15997.1;ACN12502.1;ACN10151.1;ACI68848.1	NP_001134397.1	192	220	yes	no	3;4	3.9244e-10	111.56	By matching	By MS/MS	By MS/MS	By MS/MS	By MS/MS	By MS/MS	By MS/MS	By MS/MS
EHSANILPFLIGELGLTEDR	TDTAEKNKEHSANILP	ELGLTEDRIVIRFYAL	K	E	H	D	R	I	1	1	1	1	0	0	3	2	1	2	4	0	0	1	1	1	1	0	0	0	0	20	0	2223.15	ADM15890.1;ACM09324.1;ACM08272.1;ACI68855.1;ACI68832.1;ACM08253.1	ADM15890.1	76	95	yes	no	2;3	1.258e-08	146.88	By MS/MS	By MS/MS	By MS/MS	By MS/MS	By MS/MS	By MS/MS	By MS/MS	By MS/MS
EHSVGLVVVGPEVPLAAGMVDDLQAAGVPCFGPSAK	SILAQFCKEHSVGLVV	PCFGPSAKAAQLEANK	K	E	H	A	K	A	5	0	0	2	1	1	2	5	1	0	3	1	1	1	4	2	0	0	0	7	0	36	0	3572.8	ACN10564.1	ACN10564.1	64	99	yes	yes	3	2.0073e-07	84.741	By matching	By MS/MS	By matching	By MS/MS	By MS/MS	By MS/MS	By MS/MS	By matching
EIADMTEFLGMAVISQWQK	APNKDVQKEIADMTEF	AVISQWQKDKMREALK	K	E	I	Q	K	D	2	0	0	1	0	2	2	1	0	2	1	1	2	1	0	1	1	1	0	1	0	19	0	2196.06	NP_001133550.1;ACI33457.1	NP_001133550.1	794	812	yes	no	2;3	6.4349e-16	186.94	By MS/MS	By MS/MS	By MS/MS	By MS/MS	By MS/MS	By MS/MS	By MS/MS	By MS/MS
EIAEAYLGK	SMVLVKMKEIAEAYLG	IAEAYLGKTITNAVVT	K	E	I	G	K	T	2	0	0	0	0	0	2	1	0	1	1	1	0	0	0	0	0	0	1	0	0	9	0	992.518	ACI33977.1;NP_001133079.1;ACN10487.1;ACH70651.1;ACN11074.1	NP_001133079.1	129	137	no	no	2	0.013575	74.464	By MS/MS	By MS/MS	By matching	By matching	By MS/MS	By MS/MS	By matching	By matching
EIALWFKPEEMVEYK	DSLDSANKEIALWFKP	PEEMVEYKSCQNGFLY	K	E	I	Y	K	S	1	0	0	0	0	0	4	0	0	1	1	2	1	1	1	0	0	1	1	1	0	15	1	1910.95	NP_001134716.1;AGH92528.1;ADM16016.1;ACN12689.1;ACN10329.1;ACI68568.1	NP_001134716.1	129	143	yes	no	2;3	2.4377e-19	219.95	By MS/MS	By MS/MS	By MS/MS	By MS/MS	By MS/MS	By MS/MS	By MS/MS	By MS/MS
EIDEVIGSR	HIQASVQKEIDEVIGS	IDEVIGSRVPTVDDRV	K	E	I	S	R	V	0	1	0	1	0	0	2	1	0	2	0	0	0	0	0	1	0	0	0	1	0	9	0	1016.51	ACN11468.1;ACI33595.1	ACN11468.1	333	341	yes	no	2	0.0040881	86.882	By matching	By matching	By matching	By matching	By matching	By matching	By matching	By MS/MS
EIESLVISDPDFQSEDLNFLSR	IEKTKRRREIESLVIS	EDLNFLSRSERYDAAV	R	E	I	S	R	S	0	1	1	3	0	1	3	0	0	2	3	0	0	2	1	4	0	0	0	1	0	22	0	2552.23	NP_001167318.1;ACN11348.1	NP_001167318.1	35	56	yes	no	2;3	7.0138e-46	250.64	By MS/MS	By MS/MS	By MS/MS	By MS/MS	By MS/MS	By MS/MS	By MS/MS	By MS/MS
EIFEQPESVVNTMR	NYSSFMQKEIFEQPES	ESVVNTMRGRVNFDDN	K	E	I	M	R	G	0	1	1	0	0	1	3	0	0	1	0	0	1	1	1	1	1	0	0	2	0	14	0	1677.8	NP_001133738.1;ACI33812.1	NP_001133738.1	331	344	yes	no	2	3.411e-13	196.37	By matching	By MS/MS	By matching	By matching	By matching	By matching	By matching	By matching
EIFLSQPILLELEAPLK	RGLCLKSREIFLSQPI	LELEAPLKICGDVHGQ	R	E	I	L	K	I	1	0	0	0	0	1	3	0	0	2	5	1	0	1	2	1	0	0	0	0	0	17	0	1952.12	NP_001135184.1;ACI32941.1;ACN58678.1;NP_001133092.1;ACH70679.1;NP_001135160.1;ACN12554.1;ACN10200.1;ACI69393.1;ACH70762.1	NP_001135184.1	44	60	no	no	2	6.2335e-28	235.95	By MS/MS	By MS/MS	By MS/MS	By MS/MS	By MS/MS	By MS/MS	By MS/MS	By MS/MS
EIFPAATDSR	AMNMTLEKEIFPAATD	FPAATDSRFIRAVGLP	K	E	I	S	R	F	2	1	0	1	0	0	1	0	0	1	0	0	0	1	1	1	1	0	0	0	0	10	0	1105.54	NP_001133433.1;ACN11392.1;ACI33224.1	NP_001133433.1	352	361	yes	no	2	0.029492	63.073	By matching	By matching	By matching	By matching	By matching	By matching	By MS/MS	By matching
EIFQSIAAK	KEAWPHIKEIFQSIAA	IFQSIAAKVGTGEPCC	K	E	I	A	K	V	2	0	0	0	0	1	1	0	0	2	0	1	0	1	0	1	0	0	0	0	0	9	0	1005.55	ACN10812.1	ACN10812.1	155	163	yes	yes	2	0.00039041	147.4	By MS/MS	By MS/MS	By MS/MS	By MS/MS	By MS/MS	By MS/MS	By MS/MS	By MS/MS
EIGLWFKPEEMVEYK	DSLDSAKKEIGLWFKP	PEEMVEYKSCQHEFLY	K	E	I	Y	K	S	0	0	0	0	0	0	4	1	0	1	1	2	1	1	1	0	0	1	1	1	0	15	1	1896.93	NP_001133149.1;ACH70800.1	NP_001133149.1	129	143	yes	no	2;3	1.2069e-32	252.12	By MS/MS	By MS/MS	By matching	By MS/MS	By matching	By MS/MS	By MS/MS	By MS/MS
EIHAISCSSK	DRQAELGREIHAISCS	HAISCSSKPLGSWTAQ	R	E	I	S	K	P	1	0	0	0	1	0	1	0	1	2	0	1	0	0	0	3	0	0	0	0	0	10	0	1130.54	NP_001158825.1;ACN10554.1	NP_001158825.1	391	400	yes	no	2	0.012474	76.282	By matching	By matching	By matching	By MS/MS	By matching	By matching	By matching	By matching
EIIDGVLER	RGHYTVGKEIIDGVLE	IIDGVLERIRKMTDQC	K	E	I	E	R	I	0	1	0	1	0	0	2	1	0	2	1	0	0	0	0	0	0	0	0	1	0	9	0	1042.57	ACI32906.1	ACI32906.1	114	122	yes	yes	2	0.055068	54.066	By matching	By matching	By matching	By matching	By matching	By matching	By matching	By matching
EIIDLVLDR	RGHYTIGKEIIDLVLD	IIDLVLDRIRKLADQC	K	E	I	D	R	I	0	1	0	2	0	0	1	0	0	2	2	0	0	0	0	0	0	0	0	1	0	9	0	1084.61	ACN58628.1;ACH71026.1;NP_001134939.1;ACI69569.1	ACN58628.1	94	102	no	no	2	4.5018e-09	208.25	By MS/MS	By MS/MS	By MS/MS	By MS/MS	By MS/MS	By MS/MS	By MS/MS	By MS/MS
EIIDQVLDR	RGHYTIGKEIIDQVLD	IIDQVLDRIRKLADQC	K	E	I	D	R	I	0	1	0	2	0	1	1	0	0	2	1	0	0	0	0	0	0	0	0	1	0	9	0	1099.59	NP_001133158.1;ACN10896.1;ACH70822.1	NP_001133158.1	113	121	yes	no	2	3.454e-05	173.24	By MS/MS	By MS/MS	By MS/MS	By MS/MS	By MS/MS	By MS/MS	By MS/MS	By MS/MS
EIKDILIQYDR	YVDESSKKEIKDILIQ	DILIQYDRTLLVADPR	K	E	I	D	R	T	0	1	0	2	0	1	1	0	0	3	1	1	0	0	0	0	0	0	1	0	0	11	1	1404.76	NP_001134097.1;ACN12420.1;ACN11417.1;ACN10073.1;ACM08397.1;ACH70747.1;ACM09220.1;ACM08724.1;ACI66218.1	NP_001134097.1	107	117	yes	no	2;3	0.00081578	134.56	By matching	By MS/MS	By MS/MS	By MS/MS	By MS/MS	By matching	By MS/MS	By MS/MS
EILGTAQSVGCTIDGRPPHDVIDDINSGK	RELSGTIKEILGTAQS	IDDINSGKVECPSE__	K	E	I	G	K	V	1	1	1	4	1	1	1	4	1	4	1	1	0	0	2	2	2	0	0	2	0	29	1	3063.49	ACI68370.1;ACH70859.1;ACM08535.1;ACN12217.1;ACN09870.1	ACI68370.1	131	159	yes	no	3	5.0718e-11	128.33	By MS/MS	By MS/MS	By MS/MS	By MS/MS	By MS/MS	By MS/MS	By MS/MS	By MS/MS
EILIDFSDWMK	ADQGQEWKEILIDFSD	IDFSDWMKGDLKASCV	K	E	I	M	K	G	0	0	0	2	0	0	1	0	0	2	1	1	1	1	0	1	0	1	0	0	0	11	0	1395.67	ACN12309.1;ACN09962.1;ACI70112.1;ACI69773.1	ACN12309.1	31	41	yes	no	2	1.9639e-31	265.36	By MS/MS	By MS/MS	By MS/MS	By MS/MS	By MS/MS	By MS/MS	By MS/MS	By MS/MS
EILQEEEDLAEIVQLVGK	VPLRTKAKEILQEEED	EIVQLVGKASLAETDK	K	E	I	G	K	A	1	0	0	1	0	2	5	1	0	2	3	1	0	0	0	0	0	0	0	2	0	18	0	2054.08	ACN10840.1;ACI33042.1;ACN58654.1	ACN10840.1	481	498	yes	no	2;3	4.3366e-09	155.79	By MS/MS	By MS/MS	By matching	By MS/MS	By MS/MS	By MS/MS	By matching	By matching
EILTGDVGTTIADPYLHFVK	HIVLEAGKEILTGDVG	DPYLHFVKMLPADDCR	K	E	I	V	K	M	1	0	0	2	0	0	1	2	1	2	2	1	0	1	1	0	3	0	1	2	0	20	0	2188.14	ACI68104.1;ACI67300.1;ADM16311.1;ACI68395.1;ACM09748.1	ACI68104.1	55	74	no	no	2;3	1.1169e-30	222.09	By MS/MS	By MS/MS	By MS/MS	By MS/MS	By MS/MS	By MS/MS	By MS/MS	By MS/MS
EIMAELTGR	LTRGGTIREIMAELTG	IMAELTGRRGGIAKGK	R	E	I	G	R	R	1	1	0	0	0	0	2	1	0	1	1	0	1	0	0	0	1	0	0	0	0	9	0	1018.51	ACN11106.1;ACI34296.1	ACI34296.1	136	144	no	no	2	0.0040881	86.882	By MS/MS	By MS/MS	By MS/MS	By matching	By matching	By MS/MS	By MS/MS	By MS/MS
EIMPVFLEEVVK	GTRVYVQREIMPVFLE	VFLEEVVKRTKAISIG	R	E	I	V	K	R	0	0	0	0	0	0	3	0	0	1	1	1	1	1	1	0	0	0	0	3	0	12	0	1431.77	NP_001133574.1;ACN10881.1;ACI33507.1	NP_001133574.1	309	320	yes	no	2	5.8862e-07	164.9	By MS/MS	By MS/MS	By MS/MS	By MS/MS	By MS/MS	By MS/MS	By MS/MS	By MS/MS
EIQGFFSFPVDNLR	ITMDLHQKEIQGFFSF	SFPVDNLRASPFLLQY	K	E	I	L	R	A	0	1	1	1	0	1	1	1	0	1	1	0	0	3	1	1	0	0	0	1	0	14	0	1667.83	NP_001135368.1;ACI69627.1	NP_001135368.1	139	152	yes	no	2	0.010648	93.478	By matching	By MS/MS	By MS/MS	By matching	By matching	By matching	By MS/MS	By matching
EIQYDLEDR	RSVDKKGREIQYDLED	IQYDLEDRVNFAVFPS	R	E	I	D	R	V	0	1	0	2	0	1	2	0	0	1	1	0	0	0	0	0	0	0	1	0	0	9	0	1179.54	ACI34054.1	ACI34054.1	305	313	yes	yes	2	0.00078498	132.88	By matching	By matching	By MS/MS	By matching	By MS/MS	By matching	By matching	By matching
EIRPVCR	MFSATLSKEIRPVCRK	KEIRPVCRKFMQDPME	K	E	I	C	R	K	0	2	0	0	1	0	1	0	0	1	0	0	0	0	1	0	0	0	0	1	0	7	1	928.491	ACN58701.1;NP_001134851.1;NP_001133080.1;ACN12648.1;ACN10290.1;ACM09195.1;ACI69146.1;ACH70654.1;NP_001133398.1;ACI33160.1	ACN58701.1	228	234	yes	no	2	0.0034223	138.37	By matching	By MS/MS	By MS/MS	By MS/MS	By matching	By matching	By matching	By matching
EISDDLDDLNFFNQK	DEDDGRRKEISDDLDD	DLNFFNQKKKKKKKPK	K	E	I	Q	K	K	0	0	2	4	0	1	1	0	0	1	2	1	0	2	0	1	0	0	0	0	0	15	0	1811.82	ACN11272.1;ACM09484.1;ACM09048.1	ACN11272.1	67	81	yes	no	2	2.1787e-18	206.67	By matching	By matching	By matching	By matching	By matching	By MS/MS	By matching	By matching
EISFDTMQQELQLEEDQVEAFVIDAVR	MGMAVEFKEISFDTMQ	AFVIDAVRTKMVYCKI	K	E	I	V	R	T	2	1	0	3	0	4	5	0	0	2	2	0	1	2	0	1	1	0	0	3	0	27	0	3181.51	NP_001133172.1;ACN12766.1;ACN10401.1;ACI70144.1;ACI68356.1;ACH70876.1	NP_001133172.1	291	317	yes	no	3	8.1038e-14	141.36	By MS/MS	By MS/MS	By MS/MS	By MS/MS	By matching	By matching	By MS/MS	By MS/MS
EISLLLKPR	GFGRTIAKEISLLLKP	ISLLLKPRSVLVLAAR	K	E	I	P	R	S	0	1	0	0	0	0	1	0	0	1	3	1	0	0	1	1	0	0	0	0	0	9	1	1067.67	NP_001133746.1;ACI33827.1	NP_001133746.1	38	46	yes	no	2	6.9723e-06	195.57	By MS/MS	By MS/MS	By MS/MS	By MS/MS	By MS/MS	By MS/MS	By MS/MS	By MS/MS
EITSLAPSTMK	GIADRMQKEITSLAPS	SLAPSTMKIKIIAPPE	K	E	I	M	K	I	1	0	0	0	0	0	1	0	0	1	1	1	1	0	1	2	2	0	0	0	0	11	0	1176.61	O42161.1;NP_001116997.1;ACN11317.1;ACI33371.1;AAB65430.1;ACI67042.1	O42161.1	316	326	yes	no	2	5.858e-06	163.46	By MS/MS	By MS/MS	By MS/MS	By MS/MS	By MS/MS	By MS/MS	By MS/MS	By MS/MS
EIVHLQAGQCGNQIGAK	________________	CGNQIGAKFWEVISDE	R	E	I	A	K	F	2	0	1	0	1	3	1	3	1	2	1	1	0	0	0	0	0	0	0	1	0	17	0	1821.92	ACN12631.1;ACN11362.1;ACN10275.1;NP_001134313.1;ACI67022.1;ACN12531.1;ACN10433.1;ACN10177.1;ACM09816.1;ACM08771.1;ACM09827.1;ACM08927.1;ACM08213.1	ACN12531.1	3	19	no	no	2;3	2.7394e-89	335.25	By matching	By MS/MS	By MS/MS	By MS/MS	By MS/MS	By MS/MS	By matching	By MS/MS
EIVVDFADWMK	ADQGLEWKEIVVDFAD	VDFADWMKGDLKATCV	K	E	I	M	K	G	1	0	0	2	0	0	1	0	0	1	0	1	1	1	0	0	0	1	0	2	0	11	0	1351.65	ACI69603.1;ACI68362.1	ACI69603.1	31	41	yes	no	2	4.0537e-23	252.14	By MS/MS	By MS/MS	By MS/MS	By MS/MS	By MS/MS	By MS/MS	By MS/MS	By MS/MS
EKAPSIIFIDELDAIGTK	RDAFALAKEKAPSIIF	ELDAIGTKRFDSEKAG	K	E	K	T	K	R	2	0	0	2	0	0	2	1	0	4	1	2	0	1	1	1	1	0	0	0	0	18	1	1959.06	NP_001134065.1;AGH92560.1;ACI66100.1	NP_001134065.1	265	282	yes	no	3	0.0045123	73.735	By matching	By matching	By matching	By MS/MS	By matching	By matching	By matching	By matching
EKDGLWAVLAWMSILAHR	GTGSDHIREKDGLWAV	WMSILAHRKQSVEEIM	R	E	K	H	R	K	3	1	0	1	0	0	1	1	1	1	3	1	1	0	0	1	0	2	0	1	0	18	1	2095.1	NP_001133130.1;ACH70746.1	NP_001133130.1	387	404	yes	no	4	0.043198	43.592	By matching	By matching	By matching	By matching	By matching	By matching	By matching	By matching
EKDQKHVDWVK	NRVLKDYKEKDQKHVD	QKHVDWVKAYLSIWTE	K	E	K	V	K	A	0	0	0	2	0	1	1	0	1	0	0	3	0	0	0	0	0	1	0	2	0	11	2	1410.73	NP_001133556.1;ACI33472.1	NP_001133556.1	169	179	yes	no	2	0.074829	62.466	By matching	By matching	By matching	By matching	By matching	By matching	By MS/MS	By matching
EKEIAEAIK	LQRFLLEREKEIAEAI	KEIAEAIKKDLNKSEA	R	E	K	I	K	K	2	0	0	0	0	0	3	0	0	2	0	2	0	0	0	0	0	0	0	0	0	9	1	1029.57	ACN10482.1	ACN10482.1	41	49	yes	yes	2	0.029407	86.882	By matching	By matching	By matching	By matching	By matching	By matching	By matching	By matching
EKEPWTEFAESAEEGYTTR	MPFAFCTREKEPWTEF	AEEGYTTRFCQELAKK	R	E	K	T	R	F	2	1	0	0	0	0	6	1	0	0	0	1	0	1	1	1	3	1	1	0	0	19	1	2259	NP_001140121.1;ACM08325.1	NP_001140121.1	131	149	yes	no	3	1.1161e-08	150.9	By MS/MS	By MS/MS	By MS/MS	By MS/MS	By MS/MS	By matching	By MS/MS	By matching
EKIEAELQDICK	QQMAREYREKIEAELQ	AELQDICKDVLALLDN	R	E	K	C	K	D	1	0	0	1	1	1	3	0	0	2	1	2	0	0	0	0	0	0	0	0	0	12	1	1474.73	ACI68704.1	ACI68704.1	84	95	yes	yes	2	7.8939e-12	212.1	By matching	By matching	By matching	By matching	By matching	By matching	By matching	By MS/MS
EKIETELQDICNDVLGLLDK	QAMAKEYREKIETELQ	DVLGLLDKYLIANATA	R	E	K	D	K	Y	0	0	1	3	1	1	3	1	0	2	4	2	0	0	0	0	1	0	0	1	0	20	1	2344.18	NP_001133672.1;ADM15894.1;ACI67724.1;ACI33675.1;ACH70793.1	NP_001133672.1	84	103	yes	no	3	2.6438e-06	118.66	By MS/MS	By MS/MS	By matching	By MS/MS	By MS/MS	By MS/MS	By MS/MS	By MS/MS
EKVAPLSEDFK	FKAVGEVREKVAPLSE	APLSEDFKGQMGPAAE	R	E	K	F	K	G	1	0	0	1	0	0	2	0	0	0	1	2	0	1	1	1	0	0	0	1	0	11	1	1261.66	ACI69572.1;P27007.1;NP_001117135.1;CAA36482.1	ACI69572.1	205	215	yes	no	2	0.015762	88.596	By matching	By matching	By MS/MS	By matching	By matching	By matching	By matching	By matching
ELAEDGYSGVEVR	ELNEFLTRELAEDGYS	GYSGVEVRVTPTRTEI	R	E	L	V	R	V	1	1	0	1	0	0	3	2	0	0	1	0	0	0	0	1	0	0	1	2	0	13	0	1422.66	ACN10438.1;ACI67277.1;ACH71009.1;ACI70043.1;ACH71008.1;ACI67536.1;ACN12239.1;ACN09892.1;ACI67079.1;ACN12447.1;ACN10099.1;ACI67795.1	ACN10438.1	28	40	no	no	2	1.7208e-27	246.63	By MS/MS	By MS/MS	By MS/MS	By MS/MS	By MS/MS	By MS/MS	By MS/MS	By MS/MS
ELAEQLGLSTGDPTK	DTLGPMQKELAEQLGL	LSTGDPTKTAGDEPEP	K	E	L	T	K	T	1	0	0	1	0	1	2	2	0	0	3	1	0	0	1	1	2	0	0	0	0	15	0	1557.79	NP_001134416.1;ACI69727.1;ACI67424.1	NP_001134416.1	155	169	yes	no	2	6.039e-09	172.57	By matching	By matching	By matching	By MS/MS	By matching	By matching	By matching	By MS/MS
ELAFQISK	VLVMCHTRELAFQISK	ELAFQISKEYERFSKY	R	E	L	S	K	E	1	0	0	0	0	1	1	0	0	1	1	1	0	1	0	1	0	0	0	0	0	8	0	934.512	ACN58701.1;NP_001134851.1;NP_001133080.1;ACN12648.1;ACN10290.1;ACM09195.1;ACI69146.1;ACH70654.1;NP_001133398.1;ACI33160.1	ACN58701.1	118	125	yes	no	2	0.017983	72.928	By matching	By matching	By matching	By matching	By MS/MS	By matching	By matching	By matching
ELANITEMEVSIPSK	IRILAIQKELANITEM	MEVSIPSKLHNSLIGS	K	E	L	S	K	L	1	0	1	0	0	0	3	0	0	2	1	1	1	0	1	2	1	0	0	1	0	15	0	1659.84	NP_001167124.1;ACN10888.1	NP_001167124.1	646	660	yes	no	2	2.7333e-09	174.52	By MS/MS	By MS/MS	By MS/MS	By MS/MS	By MS/MS	By MS/MS	By MS/MS	By matching
ELAPAVSVLQLFCSSPK	HMPNCTARELAPAVSV	QLFCSSPKAALRYAAV	R	E	L	P	K	A	2	0	0	0	1	1	1	0	0	0	3	1	0	1	2	3	0	0	0	2	0	17	0	1844.97	NP_001133706.1;ACI33742.1	NP_001133706.1	284	300	yes	no	2	9.6969e-14	192.24	By matching	By matching	By MS/MS	By MS/MS	By MS/MS	By MS/MS	By MS/MS	By MS/MS
ELAPSDENWFYTR	IVKLAKHKELAPSDEN	DENWFYTRAASTVRHL	K	E	L	T	R	A	1	1	1	1	0	0	2	0	0	0	1	0	0	1	1	1	1	1	1	0	0	13	0	1626.73	ACH85282.1;NP_001134778.1;AGH92557.1;ACI68837.1;ACI68828.1;ACN12290.1;ACN09943.1	ACH85282.1	42	54	yes	no	2	5.8581e-11	190.37	By MS/MS	By MS/MS	By MS/MS	By MS/MS	By MS/MS	By MS/MS	By MS/MS	By MS/MS
ELAQQVQQVAAEYGR	CLVLAPTRELAQQVQQ	QVAAEYGRASRLKSVC	R	E	L	G	R	A	3	1	0	0	0	4	2	1	0	0	1	0	0	0	0	0	0	0	1	2	0	15	0	1688.85	ACN11269.1;ACN60288.1	ACN11269.1	178	192	yes	no	2	2.2368e-12	178.47	By matching	By matching	By matching	By matching	By matching	By MS/MS	By matching	By matching
ELDLPGAFILGAGAVSSK	YNMNTVSKELDLPGAF	GAGAVSSKNVGMNAEM	K	E	L	S	K	N	3	0	0	1	0	0	1	3	0	1	3	1	0	1	1	2	0	0	0	1	0	18	0	1743.94	ACI67203.1;ACN12588.1;ACN10233.1	ACI67203.1	90	107	yes	no	2;3	7.7364e-20	202.35	By matching	By matching	By matching	By matching	By matching	By MS/MS	By matching	By matching
ELDYFAMALEK	AAGFLMKKELDYFAMA	YFAMALEKPARPFLAI	K	E	L	E	K	P	2	0	0	1	0	0	2	0	0	0	2	1	1	1	0	0	0	0	1	0	0	11	0	1328.63	NP_001133266.1;ACI32927.1;ACH70652.1	ACH70652.1	193	203	no	no	2	8.3734e-08	184.36	By MS/MS	By MS/MS	By MS/MS	By MS/MS	By MS/MS	By MS/MS	By MS/MS	By MS/MS
ELDYFAMALEKPAR	AAGFLMKKELDYFAMA	MALEKPARPFLAILGG	K	E	L	A	R	P	3	1	0	1	0	0	2	0	0	0	2	1	1	1	1	0	0	0	1	0	0	14	1	1652.82	NP_001133266.1;ACI32927.1;ACH70652.1	ACH70652.1	193	206	no	no	3	0.01619	64.121	By MS/MS	By matching	By matching	By matching	By matching	By matching	By MS/MS	By matching
ELDYFAMALEKPARPFLAILGGAK	AAGFLMKKELDYFAMA	LAILGGAKVKDKIQLI	K	E	L	A	K	V	5	1	0	1	0	0	2	2	0	1	4	2	1	2	2	0	0	0	1	0	0	24	2	2620.41	NP_001133266.1;ACI32927.1;ACH70652.1	ACH70652.1	193	216	no	no	3;4	0.00056038	69.361	By matching	By MS/MS	By matching	By MS/MS	By matching	By matching	By matching	By MS/MS
ELEAAIDMANK	KKLELDLKELEAAIDM	AAIDMANKNRDEALKQ	K	E	L	N	K	N	3	0	1	1	0	0	2	0	0	1	1	1	1	0	0	0	0	0	0	0	0	11	0	1203.58	ACN60211.1	ACN60211.1	179	189	yes	yes	2	3.6822e-11	204.56	By MS/MS	By MS/MS	By MS/MS	By MS/MS	By MS/MS	By MS/MS	By MS/MS	By matching
ELEDATESADAMNR	ANRRKLQRELEDATES	ESADAMNREVSTLKSK	R	E	L	N	R	E	3	1	1	2	0	0	3	0	0	0	1	0	1	0	0	1	1	0	0	0	0	14	0	1550.65	ACN60211.1	ACN60211.1	457	470	yes	yes	2	0.00027578	112.02	By matching	By matching	By matching	By matching	By matching	By matching	By matching	By matching
ELEEVEGSLQDVCLDLLHATAFQGTPLGHSVLGPSQNAR	QQRSVVLKELEEVEGS	LGPSQNARTLSRQDLV	K	E	L	A	R	T	3	1	1	2	1	3	4	4	2	0	7	0	0	1	2	3	2	0	0	3	0	39	0	4187.06	ACN58644.1	ACN58644.1	167	205	yes	yes	4	0.060935	17.077	By matching	By matching	By matching	By matching	By matching	By matching	By matching	By matching
ELEEVVQPIVSK	EDFQAKKKELEEVVQP	VVQPIVSKLYGSAGGP	K	E	L	S	K	L	0	0	0	0	0	1	3	0	0	1	1	1	0	0	1	1	0	0	0	3	0	12	0	1368.75	NP_001135114.1;ACI33778.1	NP_001135114.1	620	631	yes	no	2	1.4281e-12	209.67	By MS/MS	By MS/MS	By MS/MS	By MS/MS	By MS/MS	By MS/MS	By MS/MS	By MS/MS
ELEFLSMVNVGLTSLAK	EGLTDDFKELEFLSMV	VGLTSLAKLPSLPKLR	K	E	L	A	K	L	1	0	1	0	0	0	2	1	0	0	4	1	1	1	0	2	1	0	0	2	0	17	0	1849.99	ACM09612.1;ACM08988.1;ACM09323.1;ACM08598.1;ACN11163.1	ACM09612.1	43	59	no	no	2	6.7838e-28	235.4	By MS/MS	By MS/MS	By matching	By MS/MS	By MS/MS	By MS/MS	By MS/MS	By MS/MS
ELEFYLR	DGYILEGKELEFYLRK	KELEFYLRKIKAKKGK	K	E	L	L	R	K	0	1	0	0	0	0	2	0	0	0	2	0	0	1	0	0	0	0	1	0	0	7	0	968.497	NP_001134368.1;ADM16261.1;ACI67241.1;ACH70881.1	NP_001134368.1	194	200	yes	no	2	0.001663	118.69	By MS/MS	By MS/MS	By matching	By MS/MS	By MS/MS	By MS/MS	By matching	By MS/MS
ELELFPGYCYGWFNTALMVEGK	GFRQLTKRELELFPGY	TALMVEGKGYLPWLMD	R	E	L	G	K	G	1	0	1	0	1	0	3	3	0	0	3	1	1	2	1	0	1	1	2	1	0	22	0	2623.21	NP_001158753.1;ACN12587.1;ACN10232.1	NP_001158753.1	121	142	yes	no	2	0.00028267	83.359	By matching	By matching	By matching	By matching	By matching	By matching	By matching	By matching
ELELPGAFILGAGAVSSK	YNMNTVSKELELPGAF	GAGAVSSKNVGMNAEM	K	E	L	S	K	N	3	0	0	0	0	0	2	3	0	1	3	1	0	1	1	2	0	0	0	1	0	18	0	1757.96	NP_001134380.1;ACI67275.1	NP_001134380.1	90	107	yes	no	2;3	5.2143e-28	230.45	By MS/MS	By MS/MS	By MS/MS	By MS/MS	By MS/MS	By MS/MS	By MS/MS	By MS/MS
ELETVCQDVLNLLDQFLIK	AYRETIEKELETVCQD	LLDQFLIKSCGEDQLE	K	E	L	I	K	S	0	0	1	2	1	2	2	0	0	1	5	1	0	1	0	0	1	0	0	2	0	19	0	2289.19	NP_001133693.1;ACI33711.1	NP_001133693.1	92	110	yes	no	2;3	0.0052885	66.893	By matching	By matching	By matching	By matching	By matching	By matching	By MS/MS	By MS/MS
ELEVLMMSNK	KFLVHNIKELEVLMMS	EVLMMSNKTHAAEIAH	K	E	L	N	K	T	0	0	1	0	0	0	2	0	0	0	2	1	2	0	0	1	0	0	0	1	0	10	0	1192.58	ACN12793.1;ACN12424.1;ACN12228.1;ACN10849.1;ACN10427.1;ACN10077.1;ACN09881.1;ACI69805.1;ACI69435.1;ACI67494.1;ACH70771.1;ACI69037.1;ACI69854.1	ACN12793.1	84	93	yes	no	2	1.7608e-06	181.87	By MS/MS	By MS/MS	By MS/MS	By MS/MS	By MS/MS	By MS/MS	By MS/MS	By MS/MS
ELEVQHPAAK	NDAATILRELEVQHPA	EVQHPAAKMVVMASHM	R	E	L	A	K	M	2	0	0	0	0	1	2	0	1	0	1	1	0	0	1	0	0	0	0	1	0	10	0	1120.59	NP_001133979.1;ACI34253.1	NP_001133979.1	75	84	yes	no	2	0.05698	53.597	By matching	By matching	By matching	By MS/MS	By matching	By matching	By matching	By matching
ELFCNVVSK	RNGAVIDKELFCNVVS	LFCNVVSKGALSVEAL	K	E	L	S	K	G	0	0	1	0	1	0	1	0	0	0	1	1	0	1	0	1	0	0	0	2	0	9	0	1094.54	NP_001133622.1;ACI33591.1;ACN10681.1	NP_001133622.1	398	406	no	no	2	0.0023817	98.048	By MS/MS	By matching	By matching	By matching	By matching	By matching	By matching	By matching
ELFDEAHQGILASQEMVK	RVQVEIGKELFDEAHQ	LASQEMVKNMDSSKMQ	K	E	L	V	K	N	2	0	0	1	0	2	3	1	1	1	2	1	1	1	0	1	0	0	0	1	0	18	0	2043.99	ACI66391.1	ACI66391.1	205	222	yes	yes	2;3	1.2806e-104	355.43	By MS/MS	By MS/MS	By MS/MS	By MS/MS	By MS/MS	By MS/MS	By MS/MS	By MS/MS
ELFGLYGQTTGK	AVSEEKLRELFGLYGQ	LYGQTTGKGNIPMKEL	R	E	L	G	K	G	0	0	0	0	0	1	1	3	0	0	2	1	0	1	0	0	2	0	1	0	0	12	0	1312.67	NP_001135261.1;ACI33991.1;ADM16086.1;ACN10741.1;ACI68321.1;ACI32991.1	NP_001135261.1	149	160	yes	no	2	1.0989e-17	232.78	By MS/MS	By MS/MS	By MS/MS	By MS/MS	By MS/MS	By MS/MS	By MS/MS	By MS/MS
ELGADFPLTVK	ADRLVMAKELGADFPL	ADFPLTVKRGDGPEEL	K	E	L	V	K	R	1	0	0	1	0	0	1	1	0	0	2	1	0	1	1	0	1	0	0	1	0	11	0	1188.64	NP_001134990.1;ACI69762.1	NP_001134990.1	211	221	yes	no	2	0.00030518	121.29	By MS/MS	By MS/MS	By MS/MS	By MS/MS	By MS/MS	By MS/MS	By MS/MS	By MS/MS
ELGDWVTNLR	DEQVKSIKELGDWVTN	GDWVTNLRRMGAPQNG	K	E	L	L	R	R	0	1	1	1	0	0	1	1	0	0	2	0	0	0	0	0	1	1	0	1	0	10	0	1201.61	P49946.1;NP_001117129.1;ACN12764.1;ACI67950.1;ACI33630.1;ACH70935.1;ACH70934.1;AAB34575.1;NP_001133194.1;ACN12571.1;ACN12264.1;ACN10744.1;ACN10216.1;ACN09917.1;ACI68239.1;ACH70933.1	P49946.1	144	153	yes	no	2	0.00011416	150.61	By MS/MS	By MS/MS	By MS/MS	By MS/MS	By MS/MS	By MS/MS	By MS/MS	By matching
ELGEALFDEAHK	AWRDRVKKELGEALFD	ALFDEAHKTIMDVASL	K	E	L	H	K	T	2	0	0	1	0	0	3	1	1	0	2	1	0	1	0	0	0	0	0	0	0	12	0	1357.65	ACI66470.1;ACI69297.1;ACI67154.1;ACI33850.1;ACI67282.1;ACI67968.1;ACI69814.1	ACI66470.1	203	214	yes	no	2	3.1324e-33	280.38	By MS/MS	By MS/MS	By MS/MS	By MS/MS	By MS/MS	By MS/MS	By MS/MS	By MS/MS
ELGEYGLDNYTEVK	YKYSGNGRELGEYGLD	LDNYTEVKTVTIKVPQ	R	E	L	V	K	T	0	0	1	1	0	0	3	2	0	0	2	1	0	0	0	0	1	0	2	1	0	14	0	1628.76	ACI33614.1	ACI33614.1	494	507	yes	yes	2	2.1925e-25	230.26	By MS/MS	By MS/MS	By MS/MS	By MS/MS	By MS/MS	By MS/MS	By MS/MS	By MS/MS
ELGGMKDVDGFLVGGAALKPEFVDIINAK	SVTGGTCKELGGMKDV	FVDIINAKQ_______	K	E	L	A	K	Q	3	0	1	3	0	0	2	5	0	2	3	3	1	2	1	0	0	0	0	3	0	29	2	3002.58	NP_001133174.1;ACM09835.1;ACM09737.1;ACH70887.1;ACI70188.1	NP_001133174.1	218	246	yes	no	4	0.061112	40.626	By matching	By matching	By matching	By MS/MS	By matching	By matching	By matching	By matching
ELGITALHIK	QDVAQRCKELGITALH	GITALHIKLRATGGNR	K	E	L	I	K	L	1	0	0	0	0	0	1	1	1	2	2	1	0	0	0	0	1	0	0	0	0	10	0	1093.65	NP_001134254.1;NP_001133208.1;ACN12165.1;ACN09818.1;ACI66811.1;ACH70996.1;ACH70995.1;ACN12313.1;ACN09966.1	NP_001134254.1	87	96	yes	no	2	0.00019274	144.65	By MS/MS	By MS/MS	By MS/MS	By MS/MS	By MS/MS	By MS/MS	By MS/MS	By MS/MS
ELGLNPDKVNVSGGAISLGHPIGMSGCR	AQSIAVVKELGLNPDK	PIGMSGCRVLVTLLHA	K	E	L	C	R	V	1	1	2	1	1	0	1	6	1	2	3	1	1	0	2	3	0	0	0	2	0	28	1	2834.42	NP_001133421.1;ACI33207.1	NP_001133421.1	332	359	yes	no	3;4	7.3848e-08	105.82	By matching	By matching	By matching	By MS/MS	By matching	By matching	By matching	By MS/MS
ELGLSFNQK	LETKYKVKELGLSFNQ	LGLSFNQKWNTDNTLT	K	E	L	Q	K	W	0	0	1	0	0	1	1	1	0	0	2	1	0	1	0	1	0	0	0	0	0	9	0	1034.54	ACI33557.1;ACI32932.1	ACI33557.1	105	113	no	no	2	0.00070796	135.71	By MS/MS	By MS/MS	By MS/MS	By MS/MS	By MS/MS	By MS/MS	By MS/MS	By MS/MS
ELGSQNDVDGFLVGGASLKPEFVDIINAR	SVTGANCKELGSQNDV	FVDIINARA_______	K	E	L	A	R	A	2	1	2	3	0	1	2	4	0	2	3	1	0	2	1	2	0	0	0	3	0	29	1	3059.56	ACN12560.1;ACN10206.1;ACI68030.1;ACI68071.1	ACN12560.1	219	247	yes	no	3	1.3786e-15	153.1	By MS/MS	By MS/MS	By MS/MS	By matching	By MS/MS	By matching	By matching	By MS/MS
ELIEIISGAAAL	TRQAVITKELIEIISG	IISGAAAL________	K	E	L	A	L	-	3	0	0	0	0	0	2	1	0	3	2	0	0	0	0	1	0	0	0	0	0	12	0	1198.68	NP_001133150.1;ACI68114.1;ACI67381.1;ACH70803.1;ACI67573.1	NP_001133150.1	282	293	yes	no	2	0.045357	55.806	By matching	By matching	By MS/MS	By matching	By matching	By matching	By matching	By matching
ELILTSNNIQELGDLDPLASVK	EQALPSMRELILTSNN	LDPLASVKTLTLLSLL	R	E	L	V	K	T	1	0	2	2	0	1	2	1	0	2	5	1	0	0	1	2	1	0	0	1	0	22	0	2381.27	CAA06161.1;ACI34186.1;CAA06159.1;NP_001117176.1;CAA06160.1;ACM08787.1	CAA06161.1	92	113	yes	no	2	0.00077129	72.864	By matching	By matching	By matching	By matching	By matching	By MS/MS	By matching	By matching
ELINLDPFLMLDEFK	VRRSIGRKELINLDPF	FLMLDEFKVKKPSGFP	K	E	L	F	K	V	0	0	1	2	0	0	2	0	0	1	4	1	1	2	1	0	0	0	0	0	0	15	0	1835.94	NP_001135048.1;ACI70008.1	NP_001135048.1	31	45	yes	no	2	7.032e-13	191.96	By MS/MS	By MS/MS	By MS/MS	By MS/MS	By matching	By MS/MS	By MS/MS	By MS/MS
ELISNASDALDK	SNKEIFLRELISNASD	NASDALDKIRYESLTD	R	E	L	D	K	I	2	0	1	2	0	0	1	0	0	1	2	1	0	0	0	2	0	0	0	0	0	12	0	1274.64	NP_001117004.1;AGT57169.1;AAD30275.1;ACH70738.1;CAJ90902.1;ADM16069.1;ACI70148.1;ACI68177.1;AGT57170.1;NP_001139945.1;ACM09821.1;ACM08820.1;ACM09718.1	NP_001117004.1	41	52	no	no	2	1.0989e-17	232.78	By MS/MS	By MS/MS	By MS/MS	By MS/MS	By MS/MS	By MS/MS	By MS/MS	By MS/MS
ELKPALDLLEPIEQK	VETNDPEKELKPALDL	LLEPIEQKFVSISDQY	K	E	L	Q	K	F	1	0	0	1	0	1	3	0	0	1	4	2	0	0	2	0	0	0	0	0	0	15	1	1734.98	NP_001133110.1;ACH70706.1	NP_001133110.1	365	379	yes	no	2;3	0.00047636	103.83	By MS/MS	By MS/MS	By matching	By MS/MS	By matching	By MS/MS	By MS/MS	By MS/MS
ELLELASR	QGVQEASKELLELASR	ELLELASRMENERTKD	K	E	L	S	R	M	1	1	0	0	0	0	2	0	0	0	3	0	0	0	0	1	0	0	0	0	0	8	0	929.518	NP_001167124.1;ACN10888.1	NP_001167124.1	493	500	yes	no	2	0.00041257	138.06	By MS/MS	By MS/MS	By MS/MS	By MS/MS	By MS/MS	By MS/MS	By MS/MS	By matching
ELLGELDGIDVLLQQLSVFK	LQNNDSTRELLGELDG	LQQLSVFKRHNPATAE	R	E	L	F	K	R	0	0	0	2	0	2	2	2	0	1	6	1	0	1	0	1	0	0	0	2	0	20	0	2228.23	NP_001134039.1;ACI34361.1	NP_001134039.1	276	295	yes	no	2	0.0022069	76.329	By matching	By matching	By matching	By matching	By matching	By matching	By matching	By matching
ELLGETMR	ITSHLKVRELLGETMR	ELLGETMRRVVETVTG	R	E	L	M	R	R	0	1	0	0	0	0	2	1	0	0	2	0	1	0	0	0	1	0	0	0	0	8	0	947.475	NP_001158867.1;ACN10644.1	NP_001158867.1	344	351	yes	no	2	0.015953	75.189	By matching	By matching	By matching	By matching	By matching	By MS/MS	By matching	By matching
ELLGQGLLMR	IQSSGRAKELLGQGLL	LGQGLLMRNMQERNAE	K	E	L	M	R	N	0	1	0	0	0	1	1	2	0	0	4	0	1	0	0	0	0	0	0	0	0	10	0	1128.63	ACN10706.1	ACN10706.1	646	655	yes	yes	2	0.0018235	99.815	By MS/MS	By matching	By matching	By matching	By matching	By matching	By matching	By matching
ELLKPNASVALHK	RILSTIDRELLKPNAS	NASVALHKHSNALVDV	R	E	L	H	K	H	2	0	1	0	0	0	1	0	1	0	3	2	0	0	1	1	0	0	0	1	0	13	1	1418.82	NP_001140138.1;ACM09405.1	NP_001140138.1	122	134	yes	no	3	0.0045294	81.676	By matching	By matching	By MS/MS	By matching	By matching	By MS/MS	By MS/MS	By matching
ELLLQPVIISR	EVEVRSSKELLLQPVI	LQPVIISRNDKEKVLI	K	E	L	S	R	N	0	1	0	0	0	1	1	0	0	2	3	0	0	0	1	1	0	0	0	1	0	11	0	1279.79	ACI68682.1;ACI69675.1;ACI69161.1;ACI68966.1;ACI67613.1;ACN12480.1;ACN10129.1	ACI68682.1	45	55	yes	no	2	0.0002287	126.12	By MS/MS	By matching	By matching	By matching	By MS/MS	By matching	By matching	By MS/MS
ELLLQPVVISR	EVEVRSSKELLLQPVV	LQPVVISRNDKEKVLI	K	E	L	S	R	N	0	1	0	0	0	1	1	0	0	1	3	0	0	0	1	1	0	0	0	2	0	11	0	1265.77	ACI66838.1;ACI70002.1;ACI69941.1	ACI66838.1	45	55	yes	no	2	9.936e-05	138.24	By MS/MS	By matching	By matching	By matching	By matching	By MS/MS	By MS/MS	By MS/MS
ELLTLDEKDPK	AKIRKAARELLTLDEK	TLDEKDPKRLFEGNAL	R	E	L	P	K	R	0	0	0	2	0	0	2	0	0	0	3	2	0	0	1	0	1	0	0	0	0	11	1	1299.69	ACN12166.1;ACN09819.1;ACI68056.1;ACI67297.1;ACH85276.1;ACI69386.1;ACI68776.1	ACN12166.1	59	69	yes	no	2	0.0025856	117.86	By matching	By MS/MS	By MS/MS	By MS/MS	By MS/MS	By MS/MS	By MS/MS	By matching
ELLTSFGPLK	YLNDDQVKELLTSFGP	LTSFGPLKAFNLVKDS	K	E	L	L	K	A	0	0	0	0	0	0	1	1	0	0	3	1	0	1	1	1	1	0	0	0	0	10	0	1103.62	NP_001167275.1;ACN11253.1	NP_001167275.1	279	288	yes	no	2	0.019843	67.207	By matching	By matching	By matching	By matching	By matching	By matching	By matching	By matching
ELLTTMGDR	VIQEEYLRELLTTMGD	LLTTMGDRFTDEEVDE	R	E	L	D	R	F	0	1	0	1	0	0	1	1	0	0	2	0	1	0	0	0	2	0	0	0	0	9	0	1034.51	ADM15912.1;ACI69826.1;ACI69090.1;ACI66978.1;ACI33189.1;ADM15886.1;ACI68070.1;ACH70954.1;ACI67885.1;ACI66712.1;ACI66702.1;ACH70953.1;ACI69179.1;ACI66544.1	ADM15886.1	125	133	no	no	2	0.0038004	87.258	By MS/MS	By MS/MS	By matching	By matching	By MS/MS	By matching	By matching	By matching
ELLVPLTSSMYVPGTLNDVEHVLVDVGTGYYVEK	LNKSNAGKELLVPLTS	GTGYYVEKNVNDTKEF	K	E	L	E	K	N	0	0	1	2	0	0	3	3	1	0	5	1	1	0	2	2	3	0	3	7	0	34	0	3735.9	NP_001134282.1;ADM16270.1;ACI66909.1;ACM08735.1	NP_001134282.1	59	92	yes	no	3	0.040279	25.08	By matching	By MS/MS	By matching	By MS/MS	By matching	By matching	By matching	By matching
ELMQTELASFLK	TLSKKELKELMQTELA	TELASFLKSQKDPAAI	K	E	L	L	K	S	1	0	0	0	0	1	2	0	0	0	3	1	1	1	0	1	1	0	0	0	0	12	0	1408.73	ACI67765.1;ADM15946.1;ACI66095.1;CAJ90906.1;ACI67529.1;ACI67640.1;ACI66495.1	ACI67765.1	36	47	yes	no	2	1.9166e-17	225.79	By MS/MS	By MS/MS	By MS/MS	By MS/MS	By MS/MS	By MS/MS	By MS/MS	By MS/MS
ELNNVVPTEPVLFLK	RNYADHAKELNNVVPT	TEPVLFLKTPSAYLTE	K	E	L	L	K	T	0	0	2	0	0	0	2	0	0	0	3	1	0	1	2	0	1	0	0	3	0	15	0	1710.96	NP_001134417.1;ACI69832.1;ACI67430.1	NP_001134417.1	29	43	yes	no	2	0.00095781	93.243	By MS/MS	By MS/MS	By matching	By MS/MS	By MS/MS	By MS/MS	By matching	By MS/MS
ELPALPDLDCSLWLAGFCDER	SLVSMLSKELPALPDL	LAGFCDERLVPFDDGE	K	E	L	E	R	L	2	1	0	3	2	0	2	1	0	0	5	0	0	1	2	1	0	1	0	0	0	21	0	2476.14	NP_001140068.1;ACM09477.1	NP_001140068.1	53	73	yes	no	2	1.0068e-06	123.19	By matching	By matching	By matching	By MS/MS	By MS/MS	By matching	By MS/MS	By MS/MS
ELPEPLVPYGFFTDIVETIK	GALKLFFRELPEPLVP	TDIVETIKMSDYLDKV	R	E	L	I	K	M	0	0	0	1	0	0	3	1	0	2	2	1	0	2	3	0	2	0	1	2	0	20	0	2306.21	ACN10539.1	ACN10539.1	777	796	yes	yes	3	0.066141	28.355	By matching	By MS/MS	By matching	By matching	By matching	By matching	By MS/MS	By matching
ELQALYALQALMVHMEQPANLLR	RYLSDEKKELQALYAL	EQPANLLRMFFDTLYD	K	E	L	L	R	M	4	1	1	0	0	3	2	0	1	0	6	0	2	0	1	0	0	0	1	1	0	23	0	2651.39	ACN60312.1	ACN60312.1	16	38	yes	yes	3	5.179e-06	106.57	By matching	By MS/MS	By matching	By MS/MS	By matching	By MS/MS	By MS/MS	By matching
ELQENLASSDAGR	ARSDEKLRELQENLAS	LASSDAGRAGLVTRCV	R	E	L	G	R	A	2	1	1	1	0	1	2	1	0	0	2	0	0	0	0	2	0	0	0	0	0	13	0	1388.65	NP_001133746.1;ACI33827.1	NP_001133746.1	61	73	yes	no	2	1.1744e-27	252.2	By MS/MS	By MS/MS	By MS/MS	By MS/MS	By MS/MS	By MS/MS	By MS/MS	By MS/MS
ELQQFADVAK	SYHQNCSKELQQFADV	QQFADVAKAYQSRYGD	K	E	L	A	K	A	2	0	0	1	0	2	1	0	0	0	1	1	0	1	0	0	0	0	0	1	0	10	0	1147.59	NP_001135029.1;ADM15898.1;ACI69945.1;ACI68039.1;ACI68765.1;ADM16059.1;ACI66068.1	NP_001135029.1	128	137	yes	no	2	0.065118	50.791	By MS/MS	By matching	By matching	By matching	By matching	By matching	By matching	By matching
ELSDIAQR	SLSPEQKKELSDIAQR	ELSDIAQRIVAPGKGI	K	E	L	Q	R	I	1	1	0	1	0	1	1	0	0	1	1	0	0	0	0	1	0	0	0	0	0	8	0	930.477	NP_001117099.1;ACI70174.1;ACI68048.1;AAD11573.1;ACN12448.1;ACN10100.1	NP_001117099.1	15	22	yes	no	2	6.7336e-06	184.38	By MS/MS	By MS/MS	By MS/MS	By MS/MS	By MS/MS	By MS/MS	By MS/MS	By MS/MS
ELSEESLESMEEVVMDSAK	AQLIGNRKELSEESLE	EVVMDSAKAQSILEAS	K	E	L	A	K	A	1	0	0	1	0	0	6	0	0	0	2	1	2	0	0	4	0	0	0	2	0	19	0	2140.94	NP_001134028.1;ACN10991.1;ACI34338.1	NP_001134028.1	223	241	yes	no	2	9.8288e-23	214.34	By MS/MS	By matching	By matching	By matching	By matching	By MS/MS	By matching	By matching
ELSNVEALQNLK	NLSGNKIKELSNVEAL	VEALQNLKNLKSLDLF	K	E	L	L	K	N	1	0	2	0	0	1	2	0	0	0	3	1	0	0	0	1	0	0	0	1	0	12	0	1356.72	ACM09612.1;ACM08988.1	ACM09612.1	102	113	yes	no	2	0.012227	72.289	By matching	By MS/MS	By MS/MS	By matching	By MS/MS	By MS/MS	By MS/MS	By matching
ELSTVKPLK	NLSGNKIKELSTVKPL	LSTVKPLKNLKNLKSL	K	E	L	L	K	N	0	0	0	0	0	0	1	0	0	0	2	2	0	0	1	1	1	0	0	1	0	9	1	1013.61	ACM08598.1;ACN11163.1	ACM08598.1	102	110	yes	no	2	0.016323	94.309	By matching	By matching	By matching	By matching	By matching	By matching	By MS/MS	By matching
ELSVQLGMLDPDELDK	PIIADDKRELSVQLGM	LDPDELDKDGIPLTAR	R	E	L	D	K	D	0	0	0	3	0	1	2	1	0	0	4	1	1	0	1	1	0	0	0	1	0	16	0	1800.88	ACI67571.1	ACI67571.1	108	123	yes	yes	2	1.4979e-06	149.19	By MS/MS	By matching	By matching	By matching	By matching	By MS/MS	By matching	By matching
ELSVQLGMLDPDELDKDGIPLTAR	PIIADDKRELSVQLGM	DGIPLTARCVFVIGPD	R	E	L	A	R	C	1	1	0	4	0	1	2	2	0	1	5	1	1	0	2	1	1	0	0	1	0	24	1	2624.34	ACI67571.1	ACI67571.1	108	131	yes	yes	2;3	6.8463e-28	219.64	By MS/MS	By MS/MS	By MS/MS	By MS/MS	By MS/MS	By MS/MS	By MS/MS	By MS/MS
ELVIEIIR	________________	ELVIEIIRDKDQGDFR	R	E	L	I	R	D	0	1	0	0	0	0	2	0	0	3	1	0	0	0	0	0	0	0	0	1	0	8	0	983.602	ACH85319.1	ACH85319.1	7	14	yes	yes	2	0.023581	66.692	By matching	By matching	By matching	By matching	By matching	By matching	By matching	By matching
ELVLDNCR	NRTPSDVRELVLDNCR	ELVLDNCRSNEGKIEG	R	E	L	C	R	S	0	1	1	1	1	0	1	0	0	0	2	0	0	0	0	0	0	0	0	1	0	8	0	1017.49	ACM08449.1;ACN11434.1;ACN12741.1;ACN10379.1;NP_001134633.1;ACI68281.1	ACM08449.1	21	28	yes	no	2	0.0040413	90.37	By MS/MS	By matching	By MS/MS	By MS/MS	By matching	By MS/MS	By MS/MS	By matching
ELVSDTSQHVK	THILSCVKELVSDTSQ	SDTSQHVKSALASVIM	K	E	L	V	K	S	0	0	0	1	0	1	1	0	1	0	1	1	0	0	0	2	1	0	0	2	0	11	0	1241.63	ACN58704.1	ACN58704.1	330	340	yes	yes	2	0.043978	63.473	By matching	By matching	By matching	By matching	By matching	By matching	By matching	By matching
ELVVEIIR	PYKVQQARELVVEIIR	ELVVEIIRDKDQGDFR	R	E	L	I	R	D	0	1	0	0	0	0	2	0	0	2	1	0	0	0	0	0	0	0	0	2	0	8	0	969.586	NP_001133499.1;ACI33355.1	NP_001133499.1	230	237	yes	no	2	0.01124	80.438	By MS/MS	By matching	By matching	By matching	By MS/MS	By matching	By matching	By matching
ELWTVLNGWKQHFMSIDRDQSGTVDPQEMHQAVTSMGYR	TMGFNEFKELWTVLNG	AVTSMGYRLSPQAMNC	K	E	L	Y	R	L	1	2	1	3	0	4	2	3	2	1	2	1	3	1	1	3	3	2	1	3	0	39	2	4577.13	NP_001139994.1;ACN12794.1;ACN10428.1;ACM09815.1;ACM09706.1;ACM09094.1;ACM08665.1;ACM08259.1	NP_001139994.1	105	143	yes	no	4	0.075117	15.412	By matching	By matching	By matching	By matching	By matching	By matching	By matching	By matching
ELYLFDVLR	EESVRLMKELYLFDVL	LYLFDVLRADRTTAAH	K	E	L	L	R	A	0	1	0	1	0	0	1	0	0	0	3	0	0	1	0	0	0	0	1	1	0	9	0	1166.63	NP_001133642.1;ACN11379.1;ACI33625.1	NP_001133642.1	397	405	yes	no	2	3.551e-06	188.66	By MS/MS	By MS/MS	By matching	By MS/MS	By MS/MS	By MS/MS	By MS/MS	By MS/MS
ELYNWLEMDFHPLK	QYIVPEVKELYNWLEM	EMDFHPLKLSGRVAKV	K	E	L	L	K	L	0	0	1	1	0	0	2	0	1	0	3	1	1	1	1	0	0	1	1	0	0	14	0	1833.88	NP_001167090.1;ACN10789.1	NP_001167090.1	389	402	yes	no	3	0.027603	57.164	By matching	By matching	By matching	By matching	By matching	By matching	By MS/MS	By matching
[truncated: 5,148 more rows]
[truncated: 39 more columns]

## Sheet: Proteins
Protein IDs	Majority protein IDs	Peptide counts (all)	Peptide counts (razor+unique)	Peptide counts (unique)	Fasta headers	Number of proteins	Peptides	Razor + unique peptides	Unique peptides	Peptides FO_1	Peptides FO_2	Peptides FO_3	Peptides FO_4	Peptides FOPO_1	Peptides FOPO_2	Peptides FOPO_3	Peptides FOPO_4	Peptides TOFX_1	Peptides TOFX_2	Peptides TOFX_3	Peptides TOFX_4	Razor + unique peptides FO_1	Razor + unique peptides FO_2	Razor + unique peptides FO_3	Razor + unique peptides FO_4	Razor + unique peptides FOPO_1	Razor + unique peptides FOPO_2	Razor + unique peptides FOPO_3	Razor + unique peptides FOPO_4	Razor + unique peptides TOFX_1	Razor + unique peptides TOFX_2	Razor + unique peptides TOFX_3	Razor + unique peptides TOFX_4	Unique peptides FO_1	Unique peptides FO_2	Unique peptides FO_3	Unique peptides FO_4	Unique peptides FOPO_1	Unique peptides FOPO_2	Unique peptides FOPO_3	Unique peptides FOPO_4	Unique peptides TOFX_1	Unique peptides TOFX_2	Unique peptides TOFX_3	Unique peptides TOFX_4	Sequence coverage [%]	Unique + razor sequence coverage [%]	Unique sequence coverage [%]	Mol. weight [kDa]
[truncated: 1,162 more rows]
[truncated: 77 more columns]
