# Supplementary material for: Preliminary Validation of a High Docosahexaenoic Acid (DHA) and -Linolenic Acid (ALA) Dietary Oil Blend: Tissue Fatty Acid Composition and Liver Proteome Response in Atlantic Salmon (Salmo salar) Smolts
Source: PLoS One. 2016 Aug 24;11(8):e0161513. doi: 10.1371/journal.pone.0161513 (PMC4996530; doi:10.1371/journal.pone.0161513)
Supplement: S2 File — (XLSX) [file pone.0161513.s003.xlsx]

## Sheet: Perseus(transformed data)
FO_1	FO_2	FO_3	FO_4	FOPO_1	FOPO_2	FOPO_3	FOPO_4	TOFX_1	TOFX_2	TOFX_3	TOFX_4	Q-value	Intensity	Unique peptides	Razor + unique peptides	MS/MS Count	Protein IDs	Protein name
25.4184	25.2855	25.3324	25.7763	25.3534	25.6821	25.6261	25.3245	25.2376	25.7754	25.9016	25.4383	0	880910000	43	43	385	NP_001167124.1;ACN10888.1	Vigilin
25.2075	25.0191	25.0589	25.5662	25.08	25.4048	25.4444	25.0998	24.9373	25.4557	25.6903	25.2506	0	744080000	37	37	346	ACN60284.1	Staphylococcal nuclease domain-containing protein 1
26.3905	26.3904	26.683	26.6364	26.431	26.1378	26.3316	26.6543	26.3177	26.2457	26.343	26.3684	0	1628200000	32	32	410	ACI33444.1;P80426.1;NP_001117127.1;AAA18838.1;P80429.1;AAN17024.1;AAN17019.1;ACC55231.1;ABH07963.1;ABC86976.1;AAC42221.1;AAN17022.1;AAN17017.1;AAN17026.1;ACC55232.1;AAN17021.1;AAN17023.1;AAN17018.1	Serotransferrin-1 precursor
27.8953	28.3458	28.3116	28.0028	28.1336	27.8097	27.9426	28.3147	27.9226	28.0304	27.7054	28.054	0	5238700000	31	37	734	NP_001134006.1;ACI34298.1	transketolase-like protein 2
27.4164	27.1948	27.2477	27.8942	27.4119	27.8595	27.6728	27.3193	27.3446	27.8141	28.1921	27.5683	0	3712200000	29	32	524	NP_001135114.1;ACI33778.1	78 kDa glucose-regulated protein precursor
24.5494	24.7411	24.7799	24.9393	24.8172	24.8367	24.6422	25.3313	25.092	24.6037	24.7179	24.6311	0	543860000	28	28	259	NP_001133702.1;ACI33729.1	Iron-responsive element-binding protein 1
27.9121	27.8732	28.0738	27.1801	27.2999	27.5009	27.6422	27.4415	27.2901	27.2291	27.2338	27.6749	0	3594100000	27	27	573	NP_001158793.1;ACN10483.1	formimidoyltransferase-cyclodeaminase
28.2687	28.0792	27.5106	27.7533	28.0282	28.0245	28.2226	28.0547	28.1392	27.3907	27.7162	28.1076	0	4745400000	26	26	683	NP_001133898.1;ACI34103.1	4-hydroxyphenylpyruvate dioxygenase
26.97	27.0586	26.8812	26.4897	26.6557	26.9938	26.8917	26.9549	26.7967	26.3349	26.6866	26.971	0	2168100000	26	26	475	ACN11437.1;ACN58696.1;NP_001135175.1;ACH70966.1;ACH70965.1;NP_001133961.1;ACN10472.1;ACI34219.1	Pyruvate kinase muscle isozyme
26.6721	26.5343	26.3935	26.4967	26.2346	26.3155	26.0838	26.4677	26.5499	26.2851	26.4205	26.6409	0	1663400000	26	26	432	NP_001167350.1;ACN11445.1	phosphoethanolamine N-methyltransferase 3
28.1691	28.0477	28.052	28.1217	27.932	28.1337	28.198	28.1182	28.196	28.0772	28.071	28.1842	0	5255400000	25	25	673	ACH85277.1;ACI70171.1;ACI67812.1;ACI70196.1;ACI68817.1	ATP synthase H+ transporting mitochondrial F1 complex beta
26.1809	26.1511	26.2549	26.0709	25.8651	25.958	26.0919	26.1104	25.755	25.6636	25.5867	25.7388	0	1194300000	25	25	351	ACI33614.1	Aldehyde dehydrogenase, mitochondrial precursor
26.3603	26.8375	26.6113	26.3356	26.1605	26.0643	26.1486	26.6294	26.4025	25.8868	25.8625	26.0774	0	1530900000	25	25	413	ACN10812.1;ACI70192.1;ACI66086.1;ACI70150.1;ACI68129.1	6-phosphogluconate dehydrogenase, decarboxylating
26.6915	26.9734	27.1426	26.4127	26.8534	26.5514	26.4884	26.6252	26.5183	26.4189	26.1301	26.4865	0	1867900000	24	29	352	NP_001133687.1;ACN11271.1;ACI33701.1;CON__H-INV:HIT000292931	Keratin, type II cytoskeletal 8
28.6192	28.6861	28.8137	28.5516	28.5134	28.6447	28.524	28.6229	28.3692	28.5316	28.5138	28.5857	0	7327700000	22	22	527	NP_001117099.1;ACI70174.1;ACI68048.1;AAD11573.1;ACN12448.1;ACN10100.1	fructose-bisphosphate aldolase B
28.2089	28.142	28.1588	28.0087	28.2717	28.3336	28.3008	28.1022	27.9063	28.0383	28.2286	28.0193	0	5389100000	22	22	484	NP_001135793.1;NP_001133847.1;ACN10496.1;ACI34009.1;ACH70814.1	adenosylhomocysteinase
24.9986	25.664	24.825	25.8317	25.0936	25.1984	24.6246	25.4479	24.7825	24.2604	24.617	24.434	0	626600000	22	22	170	NP_001135196.1;ACI33164.1	Glucose-6-phosphate 1-dehydrogenase
23.24	23.1302	22.9516	23.4449	23.1471	23.4047	23.3985	23.1978	23.1465	23.1556	23.5315	23.215	0	180260000	22	22	138	NP_001133706.1;ACI33742.1	Coatomer subunit gamma-2
22.867	22.9155	22.2216	23.0078	22.8873	23.0166	22.726	22.8019	22.5205	23.1085	23.3261	22.8746	0	141300000	21	21	113	NP_001133550.1;ACI33457.1	Alanyl-tRNA synthetase, cytoplasmic
25.9333	25.9417	25.8769	25.5643	25.8	25.7456	25.7736	25.8533	25.4246	25.5938	25.5997	25.8534	0	1033500000	21	21	301	NP_001133645.1;ACI33628.1	Selenium-binding protein 1
22.9667	23.2196	23.2959	23.4183	23.2381	23.1321	23.4968	23.8854	23.6337	23.807	23.5742	23.7724	0	215070000	21	21	132	NP_001133776.1;ACI33880.1	Peroxisomal bifunctional enzyme
27.4828	27.3062	27.2157	27.303	27.288	27.5101	27.484	27.4205	27.3453	27.1501	27.7382	27.3994	0	3196900000	20	20	433	NP_001133465.1;ACN10804.1;ACI33287.1	Cystathionine gamma-lyase
25.3639	25.5529	25.6812	25.1215	25.2605	24.9818	25.2599	25.3761	25.1804	24.9891	24.8466	25.3322	0	731700000	20	20	223	NP_001133574.1;ACN10881.1;ACI33507.1	Aldehyde dehydrogenase family 9 member A1-A
24.7207	24.8173	25.1041	25.1075	24.6464	24.9646	24.8099	25.2207	24.9415	25.184	25.0777	24.9925	0	604260000	20	20	252	ACI34054.1	Serine hydroxymethyltransferase, mitochondrial precursor
22.7663	22.8888	23.2643	23.4118	22.8374	23.2088	23.3708	23.4832	23.2217	23.6916	23.3902	23.5173	0	187500000	20	20	123	ACN58629.1	Trifunctional enzyme subunit alpha, mitochondrial precursor
24.6358	24.5707	24.2592	24.2117	24.2403	24.2466	24.5447	24.6353	24.1131	24.1895	24.5499	24.7164	0	424810000	19	19	185	NP_001133130.1;ACH70746.1	phosphoglucomutase-1
23.7564	23.9323	23.7597	23.5005	23.5724	23.6156	23.551	23.8425	23.6571	23.674	23.5406	23.5774	0	245270000	19	19	113	NP_001133556.1;ACI33472.1	Adenylyl cyclase-associated protein 1
24.6959	24.2541	23.5692	24.2174	23.7378	24.5091	24.2576	24.3948	24.2713	23.9305	24.6164	23.9372	0	362000000	19	19	154	NP_001133698.1;ACI33721.1	syncoilin
25.3531	25.284	25.1062	24.5785	24.9909	24.7767	24.6632	24.9694	25.0676	24.8012	24.614	25.0075	0	579380000	17	17	231	NP_001133758.1;ACI33847.1;ACH70772.1	UTP--glucose-1-phosphate uridylyltransferase
25.8617	25.5988	25.5489	26.0404	25.7048	26.0415	26.0493	25.6801	25.7917	25.801	26.1265	25.7736	0	1099400000	17	17	197	NP_001134397.1;B5DGB6.1;ACI70158.1;ACI68951.1;ACI67366.1;ACH70790.1;ADM15997.1;ACN12502.1;ACN10151.1;ACI68848.1;ACN10574.1	40S ribosomal protein SA
26.0483	25.895	26.0385	26.4394	26.0667	26.3788	26.1969	26.0446	25.8291	26.3232	26.4849	26.0706	0	1376200000	17	17	243	NP_001135255.1;ACM08761.1;ACI33937.1;ACH70798.1;ACM09838.1;ACI66204.1	60S ribosomal protein L4-A
25.1596	25.6337	25.9206	24.8272	25.2959	25.0824	25.2541	25.6331	25.3286	24.879	24.8211	25.0941	0	745900000	17	17	209	NP_001135164.1;ACH70824.1;NP_001158773.1;ACN12792.1;ACN10426.1	adenosine kinase a
24.9174	24.7129	24.5334	24.9759	24.8252	25.0819	24.8946	24.8349	24.7185	24.8887	25.0396	24.8167	0	556900000	17	17	172	ACM08681.1;ACH85278.1;NP_001135112.1;ACM09182.1;ACI33692.1;ACN12474.1;ACN10123.1;NP_001133235.1;ACH85371.1	Elongation factor 1-gamma
24.5987	24.6574	24.6307	24.411	24.3191	24.2713	24.5292	24.6129	24.8894	24.5124	24.3945	24.9021	0	450310000	17	17	192	NP_001139958.1;ACM08888.1	3-oxo-5-beta-steroid 4-dehydrogenase
23.3453	23.2276	22.8994	23.2334	23.1891	23.284	23.0913	23.2399	23.2954	23.0183	23.2084	23.1156	0	171690000	17	17	144	NP_001158789.1;ACN10471.1	26S proteasome non-ATPase regulatory subunit 2
24.6474	24.4089	24.694	24.005	24.1933	24.8739	24.429	24.8407	24.2948	24.2109	24.5818	24.0534	0	427190000	16	16	187	NP_001117111.1;ACH70721.1;AAK07737.1	glycerol-3-phosphate dehydrogenase
24.1179	24.1208	23.8517	23.971	24.0445	24.1246	24.0496	24.1	24.2962	24.005	24.2281	24.0139	0	322070000	16	16	142	ACN58701.1;NP_001134851.1;NP_001133080.1;ACN12648.1;ACN10290.1;ACM09195.1;ACI69146.1;ACH70654.1;NP_001133398.1;ACI33160.1	ATP-dependent RNA helicase DDX39
26.7068	27.304	27.9507	26.3154	26.9679	26.3834	26.7512	27.3651	26.9312	26.2895	25.7859	26.1345	0	2235000000	16	16	961	NP_001133157.1;ACH70821.1	betaine--homocysteine S-methyltransferase 1
26.6568	26.6802	26.8135	26.3006	26.6529	26.4392	26.3907	26.6621	26.5497	26.4253	26.3042	26.5988	0	1774300000	16	16	279	NP_001133193.1;B5DGQ7.1;ACH70932.1;ACH70931.1;NP_001135172.1;ACH70930.1	beta-enolase
26.6274	26.6202	26.7928	26.6903	26.6016	26.7827	26.654	26.8335	26.87	26.5502	26.7322	26.4688	0	1954200000	16	16	195	NP_001133255.1;ACI32910.1	aldehyde dehydrogenase family 7 member A1 homolog
24.7589	24.7966	25.192	24.6341	24.6414	24.7634	25.0406	25.5519	25.3456	24.7598	24.515	24.8565	0	590300000	16	16	132	NP_001133370.1;ACI33102.1	Alanine aminotransferase 2-like
25.453	25.3905	25.7868	25.7752	25.6456	25.733	25.7923	25.3499	25.3118	25.8342	25.813	25.6275	0	940820000	16	16	222	ACN10701.1;ACI33158.1;ACH85350.1	disulfide-isomerase A3 precursor
23.0049	23.0325	22.9949	23.0027	23.0397	22.8503	22.8553	22.9468	22.9412	22.7089	23.0661	23.1337	0	148550000	16	16	77	ACI33321.1;ACN58683.1	WD repeat-containing protein 1
23.0178	23.2461	22.931	23.198	23.2857	23.1756	22.7954	23.1557	22.9428	22.9126	23.1781	23.0205	0	159550000	16	16	132	NP_001133605.1;ACI33559.1	T-complex protein 1 subunit beta
26.1004	26.1511	25.8122	26.0833	25.6486	25.8234	26.393	26.5419	26.0971	25.6	25.7586	25.9312	0	1260600000	16	16	242	ACI70129.1;ACI33737.1	Serine--pyruvate aminotransferase, mitochondrial precursor
23.4778	23.6157	23.4832	22.4919	22.6564	22.813	23.1805	22.8953	22.7949	22.4678	22.496	22.7115	0	149710000	16	16	89	NP_001135239.1;ACI33755.1	Xaa-Pro aminopeptidase 1
23.0268	22.9505	22.7421	22.8972	22.8051	23.0979	22.9284	22.9947	23.1468	22.723	22.9208	22.9212	0	145230000	16	16	106	NP_001133876.1;ACI34066.1	dipeptidyl peptidase 3
25.2134	25.3551	25.5734	24.5937	24.8327	24.9466	25.2352	25.4183	25.0697	24.6481	24.8127	25.1551	0	660160000	16	16	237	NP_001140121.1;ACM08325.1	Beta-ureidopropionase
25.5492	25.0701	25.2362	25.8146	25.2594	25.7928	25.7313	25.4966	25.4232	25.2342	25.7387	25.4092	0	863840000	15	15	179	ACN11311.1;ACN11018.1;ACI68732.1;ACI67449.1;ACH70647.1;ACN12499.1;ACN10148.1	Guanine nucleotide-binding protein subunit beta-2-like 1
24.6482	24.5306	24.8272	24.5744	24.6022	24.6515	24.7374	24.7195	24.7622	24.7413	24.5847	24.7237	0	483470000	15	15	168	ACH85298.1;ACI67395.1;ACI66876.1;ACI69862.1	electron-transfer-flavoprotein alpha polypeptide
26.2324	25.7694	25.5704	26.3174	26.0108	26.5469	26.3881	25.6966	26.0187	26.2286	26.7666	26.1672	0	1360600000	15	20	334	ACN10698.1;ACI32936.1	Calreticulin precursor
22.6313	22.7061	22.5228	22.7127	22.6139	22.5516	22.6005	22.7933	22.4708	22.158	22.6645	22.5734	0	114870000	15	15	81	NP_001133979.1;ACI34253.1	T-complex protein 1 subunit theta
24.4591	24.6577	24.7266	24.1948	24.6188	24.3865	24.5882	24.8044	24.3637	24.3582	24.021	24.5845	0	434920000	15	15	148	NP_001135294.1;B5X4Y9.1;ACI34370.1	phosphotriesterase-related protein
27.9755	27.9939	27.8039	27.4818	27.6793	27.7045	27.7561	27.6866	27.6957	27.4894	27.8189	27.9644	0	4117300000	15	15	363	ACI66470.1;ACI69297.1;ACI67154.1;ACI33850.1;ACI67282.1;ACI67968.1;ACI69814.1	Glutathione S-transferase theta-1
23.0189	22.7921	23.057	22.8997	22.7119	23.0351	22.9984	22.9641	22.9174	22.9561	23.0871	23.1846	0	153060000	15	15	108	ACN10564.1	Trifunctional purine biosynthetic protein adenosine-3
22.1786	22.1553	22.1758	22.4109	22.2035	22.4401	22.5084	22.406	22.124	22.383	22.5317	22.3101	0	95394000	15	15	74	NP_001167090.1;ACN10789.1	eukaryotic translation initiation factor 3, subunit A
23.35	23.5557	23.0509	23.166	22.8925	23.1435	22.9966	23.1001	23.6407	23.521	22.4015	23.0947	0	172120000	14	14	109	ACH70691.1	cytochrome P450
25.2406	24.8814	25.1658	25.497	24.9153	25.4654	25.4109	25.0878	25.0069	25.4228	25.5317	25.1297	0	710840000	14	14	165	NP_001134789.1;B5DGL6.1;ADM16028.1;ACN12266.1;ACN09919.1;ACI69899.1;ACI68885.1;ACI67043.1;ACI66415.1;ACH70890.1	40S ribosomal protein S3a
25.409	25.8021	25.1249	25.6657	25.1642	25.559	25.3151	25.5867	24.7873	25.4937	25.4683	25.4755	0	842000000	14	14	208	NP_001133421.1;ACI33207.1	Acetyl-CoA acetyltransferase, cytosolic
24.7038	24.6941	24.5186	24.4166	24.6761	24.7659	24.7999	24.5611	24.7004	24.5664	24.6802	24.7352	0	481040000	14	14	156	ADM16040.1;ACI69087.1;NP_001134951.1;ADM15971.1;ACI69619.1	3-hydroxyanthranilate 3,4-dioxygenase
27.69	27.5756	27.8667	27.4682	27.6751	27.3	27.4054	27.6086	27.7303	27.4576	27.1951	27.3945	0	3492300000	14	17	291	ACI69572.1;P27007.1;NP_001117135.1;CAA36482.1	Apolipoprotein A-I-1 precursor
25.1344	25.1297	25.2317	24.679	24.9111	24.9945	24.9875	24.9618	24.9012	25.1374	24.8719	24.8389	0	600660000	14	14	182	NP_001134990.1;ACI69762.1	Sorbitol dehydrogenase
24.6839	25.3431	25.0586	25.1912	24.7727	24.6731	24.7575	25.6483	25.2183	24.5577	24.009	24.4467	0	592930000	14	14	186	NP_001139898.1;ACM09807.1;ACM08564.1	Transaldolase
23.8566	23.9829	24.409	24.0439	24.0994	23.719	24.3625	24.3242	23.7929	24.0786	23.5925	24.3531	0	325600000	14	14	174	NP_001158767.1;ACN12736.1;ACN10374.1	S-adenosylmethionine synthetase isoform type-1
22.3377	22.0651	21.9686	22.3173	22.3018	22.475	22.2515	22.1961	21.9881	22.305	22.3972	22.1823	0	90306000	14	14	60	ACN10706.1;ACM09283.1	Eukaryotic translation initiation factor 3 subunit C
24.6038	24.5407	24.3233	24.504	24.6084	24.6243	24.2596	24.3762	24.2411	24.322	24.6924	24.3746	0	418970000	14	14	176	ACN10743.1;ACI70163.1;ACI69921.1	Glucose-6-phosphate isomerase
23.4105	23.7229	24.0048	23.4847	23.2624	23.3067	23.2269	23.5582	23.161	23.728	23.5144	23.4596	0	213620000	14	14	82	ACN60211.1	Myosin-9
27.303	26.9764	26.7766	27.6449	27.0305	27.4105	27.3166	26.803	26.8255	27.408	27.6287	27.2944	0	2839400000	14	20	454	ACN60216.1	disulfide-isomerase precursor
25.2195	25.5609	25.6979	25.2104	25.3531	25.6809	25.7722	26.1842	26.3978	25.6532	25.5066	25.8693	0	1000700000	13	13	178	AAZ92542.1	urate oxidase, partial
27.646	27.7884	27.6158	27.6351	27.3308	27.404	27.5441	27.7559	27.3428	27.4591	27.3695	27.5767	0	3585700000	13	15	278	NP_001133174.1;ACM09835.1;ACM09737.1;ACH70887.1;ACI70188.1	triosephosphate isomerase B
23.4191	23.376	23.4613	23.4558	23.6037	23.7472	23.4215	23.3693	23.5575	23.7243	23.8678	23.4495	0	219130000	13	13	116	NP_001133674.1;ACI33681.1	rRNA 2-O-methyltransferase fibrillarin
24.8869	24.6327	24.6675	24.3634	24.8045	24.46	24.6582	24.6254	24.388	24.6633	24.553	24.7059	0	464560000	13	13	130	ACM08922.1;ACI33732.1	Core histone macro-H2A.2
25.6783	25.8795	26.053	25.403	25.95	25.9346	26.1535	26.0116	25.6666	26.0227	25.8183	26.3973	0	1170500000	13	13	274	NP_001133751.1;ACI33838.1;ACI66148.1	Thymidine phosphorylase
22.3497	22.3852	22.3382	22.4794	22.2362	22.4644	22.4314	21.9713	21.5916	22.8902	22.6368	22.3212	0	102470000	13	13	33	NP_001133825.1;ACI33965.1;ACN58606.1	Coatomer subunit alpha
24.8796	24.8626	25.2126	24.5492	24.6756	24.5822	24.9268	24.9721	24.8927	24.5165	24.1957	24.6717	0	519500000	13	18	185	NP_001136188.1;ACI34215.1	Methylmalonate-semialdehyde dehydrogenase
22.3944	22.6076	21.9064	22.6027	22.2619	22.4787	22.3213	22.4818	22.2198	22.1416	22.4269	22.4414	0	99443000	13	13	63	NP_001135286.1;ACI34254.1	Ubiquitin carboxyl-terminal hydrolase 5
22.7757	22.7272	22.9362	22.9402	22.5631	22.7944	22.9633	22.8806	22.6888	22.5882	22.7392	22.864	0	132600000	13	13	69	ACI67339.1	2-amino-3-ketobutyrate coenzyme A ligase, mitochondrial precursor
23.3049	23.6977	23.6685	23.4081	23.2794	22.8505	23.3452	23.5951	23.4717	23.6454	22.599	23.3257	0	194860000	13	13	74	NP_001134944.1;ADM16117.1;ACI69600.1;ACI67658.1;ADM16204.1;ACI67152.1;ACM09222.1;ACI69202.1;ACI66990.1;ADM15991.1;ACI67535.1	glutathione S-transferase omega 1
25.3893	25.4103	25.2091	25.1665	25.3728	25.2738	25.1484	25.0877	25.2809	25.1787	25.2111	25.1616	0	731090000	13	15	178	ACI68704.1;NP_001167129.1;ACN10900.1;NP_001133488.1;ACI33335.1	14-3-3 protein beta/alpha-1
23.8373	23.7783	22.9161	23.2265	23.3433	22.9711	23.2587	23.7038	23.4477	23.0867	23.045	23.7693	0	203080000	13	13	104	NP_001134940.1;ACI69582.1	Sulfotransferase family cytosolic 2B member 1
23.3727	23.1185	22.7595	23.8369	23.1346	23.5182	23.5567	23.2842	22.4091	23.564	23.6731	23.5449	0	199300000	13	13	94	ACM08211.1	NADH-cytochrome b5 reductase 2
24.9205	25.1749	25.3545	25.2375	25.2206	25.2484	25.1404	25.4088	25.1696	25.1281	25.1903	25.0342	0	700800000	13	13	151	ACN12767.1;ACN10402.1;NP_001134235.1;ADM16122.1;ACI66723.1	Heterogeneous nuclear ribonucleoprotein A1
23.8779	23.7126	23.8455	24.0781	23.6816	24.0559	24.0446	24.0835	23.7339	24.2057	24.0994	24.0336	0	301180000	13	13	160	ACN10637.1;ACM08881.1	Trifunctional enzyme subunit beta, mitochondrial precursor
22.3177	22.3626	22.1581	22.3856	22.3414	22.1754	22.1169	22.4704	22.1919	22.1865	22.3963	22.235	0	91857000	13	13	68	ACN10899.1;ACI70197.1;ACI68658.1	T-complex protein 1 subunit alpha
23.3262	23.3581	23.5498	22.9486	23.1172	22.8883	23.2191	23.2684	22.8805	23.1695	22.4245	23.226	0	169280000	13	13	81	ACN11355.1	Transketolase
29.3038	29.3304	29.4135	29.1383	29.2984	29.0411	29.1979	29.3727	29.3395	29.3113	29.0497	29.4154	0	11858000000	12	14	1454	ACN12650.1;ACN10292.1;ACI69872.1;ACH70941.1;ACH70940.1;ACH70938.1;ACH70937.1;NP_001117033.1;CAJ76703.1;ACH70936.1;ACH70939.1	Glyceraldehyde-3-phosphate dehydrogenase
23.0342	22.6413	23.0235	22.6537	23.1737	22.7725	23.0831	22.9225	22.8298	23.0319	22.9468	23.0535	0	143260000	12	12	88	ACI32953.1	Long-chain specific acyl-CoA dehydrogenase, mitochondrial precursor
22.2273	22.2137	22.3894	22.1664	21.7439	22.096	22.1345	22.2321	22.5379	21.8661	21.9352	22.1783	0	84793000	12	12	52	NP_001133368.1;ACI33100.1;ACN10833.1	Thimet oligopeptidase
24.1028	24.228	23.9687	24.0574	24.0721	24.2339	24.1335	24.1812	24.2011	23.9551	24.0615	24.1413	0	337080000	12	17	162	NP_001135205.1;ACI33257.1	Rab GDP dissociation inhibitor beta
23.1028	23.5183	23.8982	23.066	23.2674	23.1517	23.414	23.7401	23.5052	23.1749	22.9376	23.1532	0	198010000	12	12	102	ACI33568.1	Alanine--glyoxylate aminotransferase 2, mitochondrial precursor
19.4812	20.9469	20.2236	20.4261	22.3858	21.7514	22.0595	22.9405	22.9368	22.7291	20.5541	22.4759	0	73756000	12	12	43	ACN11468.1;ACI33595.1;ACN12519.1;ACN10166.1	Cytochrome P450 2M1
23.0167	22.9864	22.505	22.9156	22.8386	22.9908	22.9612	22.7749	22.7458	22.6727	23.0319	22.8445	0	139510000	12	12	81	NP_001133821.1;ACI33956.1	Coatomer subunit beta
24.3226	24.4407	24.472	24.3344	24.1125	24.2434	24.2855	24.5853	24.4005	24.0599	24.2122	24.3072	0	384640000	12	12	152	ACI33980.1	Glutaryl-CoA dehydrogenase, mitochondrial precursor
22.4848	22.6412	22.1006	22.5129	22.4242	22.4457	22.2965	22.4305	22.3707	22.1894	22.4877	22.252	0	101020000	12	12	64	NP_001134065.1;AGH92560.1;ACI66100.1	26S protease regulatory subunit 6A
23.4836	23.6562	23.3155	23.3316	23.6609	23.4083	23.3818	23.4221	23.3842	23.3832	23.5247	23.5702	0	204830000	12	13	87	ACN11191.1	Annexin A11
22.2936	22.4789	22.1379	22.557	22.5873	22.3173	22.0154	22.5406	22.245	22.2099	22.4619	22.28	0	96834000	12	12	65	NP_001167310.1;ACN11333.1	T-complex protein 1 subunit epsilon
24.1082	24.1063	24.0683	23.7821	23.9186	23.9762	24.1524	24.1325	24.0528	23.7201	23.7838	24.1414	0	305360000	11	11	111	ADM16037.1;ACM08819.1;ACI69487.1;ACH70616.1;ACI67166.1;ACI68367.1	Hypoxanthine-guanine phosphoribosyltransferase
25.1688	25.1532	25.372	25.5646	25.2321	25.1904	25.1546	25.3111	25.1361	25.1986	25.4235	25.0455	0	726630000	11	23	287	NP_001133079.1;ACN10487.1;ACH70651.1;ACN11074.1	heat shock cognate 71 kDa protein
25.0181	24.8119	24.845	25.338	24.8407	25.2463	25.1798	24.9221	24.7158	25.2464	25.3699	24.9631	0	634310000	11	11	166	NP_001133384.1;ACN12489.1;ACN12254.1;ACN10138.1;ACN09907.1;ACI70182.1;ACI66248.1;ACI66121.1;ACI33131.1;ACH70782.1	40S ribosomal protein S2
24.5537	24.3003	24.2204	24.3974	24.1632	24.4044	24.5984	24.5683	24.4634	24.2051	24.2639	24.3639	0	396930000	11	11	163	NP_001133163.1;AGH92539.1;ACI67853.1;ACH70848.1;ADM16197.1;ADM16180.1;ACN12404.1;ACN10057.1;ACM08938.1;ACI69301.1;ACI66802.2;ACI66540.1;ACI69329.1	ATP synthase subunit b, mitochondrial
25.1013	24.7773	24.956	25.27	24.9605	25.2862	25.1849	24.9559	25.0092	25.1522	25.4919	24.9916	0	674010000	11	11	136	NP_001134368.1;ADM16261.1;ACI67241.1;ACH70881.1	40S ribosomal protein S8
24.8651	24.6134	24.7921	25.1155	24.9492	25.075	25.0876	24.817	24.6022	25.2024	25.1662	24.896	0	588020000	11	11	133	ACH85352.1;NP_001134228.1;AGH92587.1;ACN12693.1;ACN12680.1;ACN10333.1;ACN10320.1;ACI66701.1;ACH70989.1;ACI68996.1	ribosomal protein L7a
23.307	23.1065	23.0713	23.0929	23.0915	23.34	23.2373	23.2684	23.2024	22.8751	23.2832	23.37	0	174330000	11	11	93	NP_001133222.1;ACI66369.1;ACH85262.1	aldo-keto reductase family 7 member A5-like
27.1525	27.2321	27.0628	27.147	27.345	27.006	26.9811	27.29	27.1172	27.1098	27.1294	27.4688	0	2752000000	11	20	511	NP_001133366.1;ACI33096.1;CBL79146.1	Alpha-enolase
25.5491	25.259	25.694	25.59	25.6651	25.5088	25.5535	25.5571	25.6656	25.5813	25.5925	25.3131	0	878190000	11	22	276	ACI33148.1	60 kDa heat shock protein, mitochondrial precursor
22.0891	22.3033	22.3721	21.9188	22.3381	22.1504	21.8363	22.1705	22.2958	22.1208	22.2098	21.9553	0	84622000	11	12	79	NP_001133432.1;ACI33223.1;ACI34242.1	Junction plakoglobin
22.8139	22.6265	22.1392	22.547	22.4273	22.6719	22.4656	22.7117	22.475	21.878	22.4729	22.4448	0	106630000	11	11	53	NP_001133482.1;ACI33323.1;ACN58702.1	T-complex protein 1 subunit delta
22.2809	22.3065	22.3628	22.4734	22.6313	22.3753	22.6033	22.4331	23.3317	22.9308	22.7497	22.9211	0	114790000	11	11	82	NP_001133683.1;ACI33694.1;ACI66884.1	Phytanoyl-CoA dioxygenase, peroxisomal
27.5369	27.4167	27.6218	27.4605	27.3076	27.4119	27.7144	27.7942	27.6784	27.5091	27.5382	27.4645	0	3598700000	11	35	629	ACI33922.1;NP_001117114.1;AAZ73233.2	Phosphoenolpyruvate carboxykinase, mitochondrial precursor
23.8709	23.9257	23.8995	23.8967	23.7993	23.8385	23.5713	23.6664	23.3687	23.7903	23.6623	23.8851	0	259600000	11	12	107	ACI33977.1;NP_001135156.1;ACH70704.1;NP_001140123.1;ACM08448.1;CAG14941.1	Heat shock cognate 70 kDa protein
25.0228	25.3995	25.6151	25.0682	24.774	24.7901	25.1995	25.5919	25.3116	24.6926	24.0859	24.6643	0	647170000	11	11	183	ACI34202.1;ACN58716.1	Methylmalonate-semialdehyde dehydrogenase
25.5812	25.9453	25.5512	25.6799	25.4328	25.3479	25.4793	25.4386	25.5501	25.0677	25.3565	25.4963	0	866420000	11	11	176	ACI66269.1;ACI69846.1	Glyceraldehyde-3-phosphate dehydrogenase
23.1265	23.1847	22.8367	23.0705	23.3753	23.1917	22.9296	23.0378	23.3645	22.5868	22.5785	23.219	0	159890000	11	11	129	NP_001134326.1;ACI67074.1	dehydrogenase/reductase SDR family member 1
25.935	25.8733	25.6085	25.747	25.6187	25.7356	25.8579	25.9427	25.5519	25.5786	25.6563	25.9922	0	1054100000	11	11	195	ACI67571.1	Peroxiredoxin-6
23.0472	23.6739	23.9851	23.4775	23.7804	23.5925	24.053	24.4107	23.8728	24.8938	24.1695	24.6534	0	319920000	11	15	114	ACI67927.1	Retinol dehydrogenase 3
23.3287	23.6574	23.6956	23.2482	23.332	23.2447	23.598	23.2946	23.3399	23.3508	23.4126	23.5331	0	239490000	11	11	116	ACN12560.1;ACN10206.1;ACI68030.1;ACI68071.1;ACI68763.1	Triosephosphate isomerase
23.3605	22.9535	23.132	23.4811	22.936	23.397	23.527	23.3196	23.2194	23.4145	23.4147	23.2943	0	188830000	11	11	113	ACN11082.1;NP_001134876.1;ACI69259.1;ACN12654.1;ACN10295.1	Prohibitin-2
22.7998	22.9503	22.427	22.6953	22.9334	22.7995	22.541	22.7135	22.7282	22.697	22.8833	22.6751	0	126580000	11	11	92	NP_001140138.1;ACM09405.1	26S protease regulatory subunit 6B
22.2365	22.3876	22.0864	21.73	22.6631	22.0771	22.1453	22.5828	22.0656	22.1171	22.0924	22.4991	0	89279000	11	11	60	ACN10783.1;NP_001135115.1;ACI33824.1	Flotillin-1
26.6425	26.6099	26.7141	25.7991	26.1398	26.1676	26.5651	26.5086	26.3108	25.8767	26.0582	26.5216	0	1571300000	11	13	202	ACN60290.1	Glycogen phosphorylase, muscle form
22.7025	22.7515	22.6667	22.369	22.7694	22.4723	22.6197	22.6221	22.924	22.3657	22.134	22.7211	0	113790000	10	10	63	NP_001135227.1;ACI33574.1;ACI33549.1;ACH70702.1	DNA-(apurinic or apyrimidinic site) lyase
23.56	23.5057	23.5266	23.534	23.298	23.5776	23.4509	23.5575	23.4051	23.7122	23.735	23.6845	0	223850000	10	10	101	NP_001133108.1;ACN10798.1;ACH70703.1;ADM15927.1;ACI70165.1;ACI66736.1	medium-chain specific acyl-CoA dehydrogenase, mitochondrial
22.2024	22.3163	22.147	22.0299	22.1104	22.1002	22.0601	22.2147	21.9565	22.2391	22.2138	21.9897	0	83157000	10	10	53	NP_001133113.1;ACI67013.1;ACH70710.1	26S protease regulatory subunit 7
23.5041	23.5022	23.4256	23.3299	23.6263	23.4959	23.4731	23.5219	23.541	23.3221	23.4524	23.4778	0	208820000	10	11	116	NP_001133672.1;ADM15894.1;ACI67724.1;ACI33675.1;ACH70793.1	14-3-3 protein beta/alpha-2
24.8328	24.6449	24.7246	25.0789	24.8642	25.0728	25.0059	24.6877	24.4376	25.0999	25.2488	24.8619	0	580520000	10	10	73	NP_001134763.1;ACN12432.1;ACN10085.1;ACI68750.1;ACH70813.1;ACN12660.1;ACN10300.1	60S ribosomal protein L13
22.9359	22.6036	21.8172	22.3253	22.4584	22.9453	22.7563	22.6433	22.8294	22.2732	22.9637	22.6004	0	117210000	10	10	81	ACI33142.1;ACI33302.1	Annexin A13
22.355	22.2846	22.2347	22.5674	22.1758	22.5226	22.2861	22.4662	22.3125	22.5368	22.8327	22.3876	0	101880000	10	10	83	ACI33218.1	Mitochondrial inner membrane protein
22.567	22.3859	21.8072	22.6743	22.1149	21.9571	22.1895	22.0933	22.6191	21.9637	22.216	21.9359	0	88554000	10	10	53	ACI33259.1	Ornithine aminotransferase, mitochondrial precursor
22.7172	22.6168	22.831	22.2414	22.7957	22.6089	22.7546	22.6682	23.1089	22.3995	22.2677	22.5858	0	124860000	10	10	77	NP_001135106.1;ACI33266.1	Beta-hexosaminidase beta chain precursor
22.3255	22.3683	22.1591	22.0224	22.1847	22.1986	22.0784	22.0206	21.8876	21.9001	22.1313	22.1145	0	83220000	10	10	56	NP_001133469.1;ACI33296.1;ACN10604.1	Annexin A11
24.0314	23.7199	23.5615	24.0278	23.7799	24.0022	23.7161	23.7025	24.0347	24.0028	24.112	23.8475	0	279380000	10	10	132	NP_001133602.1;ACI33553.1	prohibitin
22.2478	22.4843	22.3229	22.9745	23.0555	22.8121	22.9496	23.1947	23.5182	22.9906	22.8355	23.1204	0	143850000	10	10	89	ACN12757.1;ACN10394.1;NP_001135240.1;ACI33762.1	Hydroxyacid oxidase 1
24.4191	23.9028	23.4948	24.126	24.7126	24.4701	24.0747	23.8081	24.2603	23.6436	23.9725	24.7879	0	338290000	10	10	103	NP_001133769.1;ACN10477.1;ACI33869.1	carbonic anhydrase
22.8371	22.8378	22.6578	22.8932	22.8085	22.9299	22.8142	22.7958	22.8986	22.6495	22.6901	22.7534	0	132790000	10	10	67	ACN10552.1;ACI33944.1;ACI68515.1;ACH70650.1;ACI70143.1;ACI68400.1	F-actin-capping protein subunit beta
24.3726	24.5114	24.0904	24.2271	24.2214	24.3531	24.2492	24.3487	24.1893	24.4882	24.1861	24.4097	0	379460000	10	12	148	ACI66684.1;ACI67097.1;ACI68982.1;ACI67039.1;ACI69907.1	Inorganic pyrophosphatase
26.3265	26.1645	25.9983	26.4777	25.7315	25.4172	25.9179	25.7648	26.2128	25.4064	26.0984	25.6239	0	1177300000	10	13	138	ACI67145.1;ACI68683.1;NP_001134858.1;ACI69176.1;ACI67901.1	Peroxiredoxin
24.0931	23.8597	23.7507	24.3043	23.7358	24.2016	23.9717	23.801	23.7353	24.0794	24.4676	23.9015	0	306970000	10	10	62	ACN12166.1;ACN09819.1;ACI68056.1;ACI67297.1;ACH85276.1;ACI69386.1;ACI68776.1	40S ribosomal protein S9
23.7026	23.8033	23.5001	23.873	23.8311	23.6199	23.7311	23.5988	23.3842	23.5539	24.3828	23.8349	0	239300000	10	10	75	ACI67363.1	Aldose reductase
24.0482	24.2104	24.2085	23.4725	23.7921	23.9151	23.9563	24.001	23.9571	23.5782	23.7171	24.1914	0	295580000	10	10	159	ACI67838.1	Catechol-O-methyltransferase domain-containing protein 1
25.7499	25.8053	26.0193	26.4502	25.964	26.166	25.9619	25.7399	25.3537	25.846	26.2951	25.8863	0	1192400000	10	10	165	AGH92516.1;ACI69864.1;ACI67931.1;ACI69995.1;ACI68543.1;NP_001134342.1;ACI67125.1	peptidylprolyl isomerase B
25.7459	26.1055	26.5143	25.5663	25.9228	25.3567	25.8164	26.4147	26.2304	25.2125	25.3166	25.9075	0	1131800000	10	10	154	NP_001134612.1;ACI68193.1	Apolipoprotein A-I precursor
23.3045	23.2135	23.3538	23.3973	23.4704	23.3645	23.4004	23.4013	23.5019	23.4454	23.5548	23.3244	0	198240000	10	10	108	Q9YGC0.1;NP_001117103.1;CAA10040.1;CAA10039.1;ACM08489.1;CAA10191.1;NP_001135061.1;AHG98254.1;AHG98253.1;AGH92561.1;ACN11237.1;ACM09390.1;ACI70046.1;ABH07957.1	RAN_SALSA RecName: Full=GTP-binding nuclear protein Ran;AltName: Full=GTPase Ran;AltName: Full=Ras-related nuclear protein;>gi
22.8463	22.8679	22.4087	22.3265	22.455	22.5968	22.5175	22.5446	22.8992	22.053	22.3046	22.6084	0	110500000	10	10	71	NP_001167055.1;ACN10704.1;CAD59068.1;ACH85265.1	alpha-actinin-1
23.1872	22.8091	22.9895	23.3162	23.2252	23.0092	23.1082	22.7068	23.2475	23.2607	23.1534	22.8827	0	161990000	10	10	91	ACN10751.1;ACN11125.1;ACN58590.1	Elongation factor 2
24.0863	24.1915	24.1896	24.1799	23.8361	24.0283	24.2748	24.2671	23.9774	23.8962	24.0195	24.0243	0	326510000	10	10	115	ACN11110.1;NP_001133921.1;ACN10791.1;ACI34142.1;ACN58684.1	Phosphoenolpyruvate carboxykinase, cytosolic
27.6959	27.9192	28.1466	27.7389	28.0856	27.7845	27.973	27.9951	28.3701	28.2992	28.0346	28.2961	0	4934900000	10	22	586	ACN11170.1	Catalase
23.3333	23.096	23.1786	23.3163	23.048	23.2845	23.229	23.3445	23.3875	23.3251	23.1686	23.3625	0	181630000	10	10	64	ACN11185.1	3,2-trans-enoyl-CoA isomerase, mitochondrial precursor
20.5111	20.0065	20.2195	20.9593	20.43	21.1712	20.649	20.4193	21.0635	21.0865	21.329	20.5288	0	32021000	10	10	26	NP_001167302.1;ACN11321.1	Delta-1-pyrroline-5-carboxylate synthetase
23.5752	23.582	24.2243	23.8796	23.572	23.7742	23.9882	23.9753	23.7213	23.9702	23.6882	23.7756	0	267640000	10	10	119	ACN58607.1	Succinyl-CoA ligase subunit alpha, mitochondrial precursor
28.9404	28.9337	28.8468	28.7675	28.941	28.7861	28.8099	28.7591	28.9646	28.7826	28.8325	28.8304	0	8702800000	9	17	535	O42161.1;NP_001116997.1;ACN11317.1;ACI33371.1;AAB65430.1;ACI67042.1;NP_001134991.1;ACI69763.1	ACTB_SALSA RecName: Full=Actin, cytoplasmic 1;AltName: Full=Beta-actin;Contains: RecName: Full=Actin, cytoplasmic 1, N-terminally processed;>gi
24.3418	24.2015	24.5835	24.6118	24.0976	24.6882	24.3975	24.2745	24.0686	24.6359	24.7862	24.29	0	409570000	9	9	65	ACX35606.1;ACX35593.1;ACN12267.1;ACN12175.1;ACN09920.1;ACN09828.1;ACI69981.1;ACI69333.1;ACI67484.1;ACI66957.1;ACH70615.1;ABQ59673.1;ACI70010.1	ribosomal protein S18
21.7624	21.9444	21.7018	22.2476	22.2072	21.9255	22.1438	22.1045	22.0847	22.2092	22.1864	22.2564	0	79404000	9	9	55	NP_001133088.1;ACH70672.1;ACI32957.1	succinate dehydrogenase [ubiquinone] flavoprotein subunit, mitochondrial
22.9472	22.968	22.6489	23.1241	23.1516	23.1474	23.1342	23.4411	23.2314	22.625	22.4495	22.8686	0	153680000	9	9	58	NP_001134995.1;ACI70175.1;ACI69772.1;ACI68926.1;ACH70789.1	guanidinoacetate N-methyltransferase
23.6271	23.9519	24.0303	23.7686	24.1859	23.5074	23.4579	23.7899	24.1341	23.7591	23.7538	24.024	0	268410000	9	9	100	ACM09605.1;NP_001135084.1;ADM16201.1;ACN12308.1;ACN09961.1;ACI70136.1;ACI69398.1;ACI68833.1;ACI68816.1;ACH70836.1;ACI66512.1	Phosphatidylethanolamine-binding protein 1
23.5699	23.3112	23.4904	24.0967	23.7126	23.8284	23.7402	23.5367	23.7691	23.8799	23.8528	23.6182	0	249720000	9	10	84	ACI67410.1;ACH70844.1;ACN12677.1;ACN10317.1;ACI66198.1;ACI69521.1	60S ribosomal protein L5
22.585	22.5259	21.9621	22.3033	22.2744	22.3589	22.3935	22.3891	22.3765	22.3307	22.4958	22.2864	0	97101000	9	9	46	NP_001133203.1;ACH70971.1;ACH70972.1	proteasome (prosome, macropain) 26S subunit, non-ATPase, 13
22.6677	22.698	22.1273	21.8645	22.1658	22.0743	22.248	22.5359	22.2705	21.622	21.8765	22.2503	0	90997000	9	9	57	NP_001133307.1;ACI33005.1	deoxyribose-phosphate aldolase
23.8219	23.6195	24.1936	23.7738	23.7361	23.8521	23.8928	23.7888	23.9134	24.0375	23.7738	23.8275	0	274390000	9	9	116	ACI33118.1	Dihydrodipicolinate synthase-like, mitochondrial precursor
25.5103	25.5998	25.8797	24.6468	25.0584	24.7827	25.2223	25.1112	24.8201	24.637	24.3104	24.9272	0	656040000	9	9	94	NP_001135211.1;ACI33336.1	Aspartate aminotransferase, cytoplasmic
23.5211	23.4234	23.5594	23.1114	23.0546	23.7023	23.5368	23.6727	23.4879	22.8549	22.7145	23.2942	0	199280000	9	9	83	ACI33365.1	Cathepsin D precursor
22.047	22.1337	21.5643	22.4218	21.8311	22.6055	22.0253	21.9023	21.6762	22.387	22.7933	21.7706	0	85461000	9	9	53	NP_001133642.1;ACN11379.1;ACI33625.1	asparagine synthetase
23.2142	23.0924	23.1581	22.669	22.8371	23.0269	22.8769	22.7189	23.2286	23.1477	23.0422	22.7263	0	154280000	9	9	56	NP_001133693.1;ACI33711.1	14-3-3 protein eta
23.8338	23.9334	23.7843	23.4908	23.8761	23.619	23.6261	23.7725	23.667	23.5581	23.45	23.7366	0	244410000	9	9	79	NP_001133746.1;ACI33827.1	Sepiapterin reductase
22.7166	23.2818	22.9796	22.8546	21.9193	22.1973	22.4775	22.8623	22.369	22.8145	21.9412	22.6544	0	118770000	9	9	66	NP_001135118.1;ACN11404.1;ACI33951.1	Estradiol 17-beta-dehydrogenase 12-B
26.6312	26.5779	26.6599	26.5302	26.1984	26.4456	26.8806	26.8711	26.7024	26.0672	26.1008	26.4328	0	1790400000	9	19	466	ACI34022.1	Aspartate aminotransferase, mitochondrial precursor
21.9769	22.1499	22.0592	22.2726	22.2059	22.146	22.5657	22.5353	22.7584	22.4859	22.5941	22.7806	0	100470000	9	9	53	ACI68983.1;ACI34093.1	Glutathione S-transferase theta-1
26.3684	26.4799	26.4726	26.2223	26.0624	26.1006	26.2184	26.5764	26.1711	25.6718	25.6589	25.9368	0	1408500000	9	16	246	ACI34120.1	NDRG1
21.8485	21.531	21.4112	21.7478	21.8302	21.9765	21.7392	21.5704	21.75	21.8984	22.3106	21.7191	0	64741000	9	9	53	NP_001134028.1;ACN10991.1;ACI34338.1	Nucleolar protein 5A
24.6322	24.5515	24.9639	24.0601	24.2894	24.0423	24.6848	24.882	24.5812	24.2667	24.1993	24.6596	0	432860000	9	9	123	ACI66391.1	Glutathione S-transferase theta-1
22.3932	22.4252	22.1349	21.9465	22.2098	22.6609	22.8168	22.5711	22.1857	22.1501	22.834	22.4688	0	103160000	9	9	42	ACI66590.1;ACI66434.1	Arylamine N-acetyltransferase, pineal gland isozyme NAT-10
24.8494	24.8064	24.4956	25.2118	25.1478	25.2792	25.0568	24.9138	24.8239	25.1217	25.4047	25.0688	0	631060000	9	11	376	NP_001135078.1;ACN12548.1;ACN10194.1;ACI70187.1;ACI70123.1;ACI67106.1;ACI66814.1;ACI70155.1;ACI68315.1;ACH70870.1;ACH85333.1;ACI67167.1	60S ribosomal protein L3
22.9777	23.3251	22.8486	22.8397	22.8775	22.9107	23.3617	23.4329	23.5993	22.9527	22.7611	23.1354	0	165520000	9	9	84	ACN11078.1;ACI67446.1;ACI69471.1;ACI70091.1	Aldose reductase
22.0037	22.1889	22.0786	22.2611	22.4432	22.0681	22.4038	22.3729	22.7362	22.2807	22.2282	22.6675	0	90190000	9	9	55	NP_001134549.1;ACI67966.1	Hydroxyacid oxidase 2
22.8176	22.5563	21.9649	22.6085	22.5573	22.4901	22.7177	22.3552	22.9506	22.2609	22.3277	22.6005	0	110980000	9	9	60	NP_001134917.1;ACI69458.1	Epoxide hydrolase 1
23.3385	23.1039	21.577	23.7391	25.3149	22.983	24.4508	24.2661	25.3979	25.2264	24.3592	24.6099	0	357380000	9	9	84	ACN12538.1;ACN10184.1;NP_001134508.1;ACI67810.1	Annexin A5
23.184	23.1751	22.6917	23.0201	22.901	23.3525	23.1382	23.2084	23.1869	22.9945	23.343	23.2877	0	169360000	9	9	99	ACN62250.1;ACN12592.1;ACN10237.1;NP_001134493.1;ACI67747.1;ACN12774.1;ACN10409.1	alcohol dehydrogenase class 3
22.4734	22.2457	22.6738	22.2002	22.2886	22.1834	22.9219	22.7474	22.3937	21.6278	21.6632	22.4277	0	99983000	9	9	43	NP_001167410.1;ACN11006.1	dihydropyrimidinase
21.6916	21.7195	21.1373	21.8436	21.5259	21.4557	21.8509	21.9861	21.9554	21.8049	22.1148	21.8398	0	64352000	9	9	38	ACN60294.1	Lysyl-tRNA synthetase
24.5974	24.5112	24.5021	24.9306	24.6515	24.9747	24.9325	24.3834	24.7308	24.8472	25.1822	24.6219	0	510230000	9	10	139	ACN60341.1	Calreticulin precursor
23.1993	22.8714	23.4074	23.6341	23.2463	23.6108	23.3844	23.0754	23.0536	23.7124	23.5683	23.2314	0	189920000	8	8	70	NP_001117010.1;ACN12270.1;ACN12201.1;ACN09923.1;ACN09854.1;ACI69474.1;ACI66733.1;AAG22824.1;ACH70675.1;ACI66431.1;ACI68815.1;ACI66616.1;NP_001134919.1;ACI69460.1	40S ribosomal protein S11
22.461	22.6434	22.3556	22.1302	22.3029	22.6897	22.4611	22.3553	22.3514	22.1376	22.3316	22.3147	0	99650000	8	8	83	NP_001133393.1;ACI33146.1;AAY28972.1;ACN11423.1;AAY28975.1	Caspase-3
26.2186	26.0501	25.6037	25.9946	25.8253	25.8273	25.8401	25.9076	25.4823	25.7302	25.8818	26.0897	0	1135200000	8	25	287	ACH70652.1;ACI70178.1;ACI68112.1	phosphoglycerate kinase 1
23.971	23.6372	23.5776	24.3586	23.6929	24.1799	24.1375	23.9953	23.926	24.155	24.3701	24.0742	0	313590000	8	8	120	NP_001133089.1;ADM16080.1;ADM15976.1;ACN12697.1;ACN12283.1;ACN10337.1;ACN09936.1;ACI69823.1;ACI69224.1;ACI68432.1;ACI66278.1;ACH70676.1	60S ribosomal protein L9
21.8535	21.6689	21.6503	21.9022	21.7862	21.3557	21.6889	21.7752	21.4179	21.8189	21.846	21.6005	0	60891000	8	8	31	ACI32973.1;ACH70720.1	Stress-induced-phosphoprotein 1
22.0917	21.8346	21.7048	22.0586	22.3731	21.8937	22.0801	22.4113	22.6288	22.1986	22.2039	22.1054	0	83806000	8	8	47	NP_001135162.1;ACH70777.1	glutathione S-transferase kappa 1-like
24.7247	24.5757	24.8425	25.2609	24.5633	25.0741	25.1746	24.811	24.8404	25.0379	25.1452	24.8033	0	574240000	8	8	110	ADM16249.1;ADM16007.1;ACN12369.1;ACN12195.1;ACN10022.1;ACN09848.1;ACI68255.1;ACI67162.1;ACI66971.1;ACH70842.1;ACN11199.1	40S ribosomal protein S12
21.5595	21.5149	22.2479	22.0707	21.82	21.9289	21.6781	21.7773	21.7155	22.0276	21.5638	21.743	0	66456000	8	8	44	NP_001133170.1;ACN12594.1;ACN12243.1;ACN10239.1;ACN09896.1;ACM09096.1;ACM08578.1;ACH70874.1;ACN12487.1;ACN12197.1;ACN10136.1;ACN09850.1;ACM09464.1;ACI67914.1	high-mobility group box 2
25.6474	25.0275	24.7968	24.8303	25.3779	25.0076	25.1206	25.1004	25.1384	24.4536	24.9765	25.1005	0	640690000	8	8	113	NP_001133186.1;NP_001133185.1;AGH92603.1;AGH92538.1;ADM16085.1;ADM16072.1;ACN12735.1;ACN12704.1;ACN12698.1;ACN12518.1;ACN11206.1;ACN10373.1;ACN10344.1;ACN10338.1;ACN10165.1;ACM09550.1;ACM09448.1;ACM09085.1;ACM08633.1;ACM08610.1;ACM08237.1;ACI69721.1;ACI68583.1;ACI68402.1;ACI66692.1;ACI66075.1;ACI33806.1;ACI33505.1;ACH70912.1;ACH70911.1;ACH70910.1;ADM16205.1;ACI68592.1;ACM09117.1;ACI66085.1	calmodulin 2 (phosphorylase kinase, delta)-3
22.7939	23.0244	22.8238	22.7449	22.8511	22.7631	22.885	23.0256	22.7002	22.6989	22.7418	22.8721	0	137660000	8	8	73	AHG98248.1;ACI68156.1;ACH70970.1;AHG98250.1;AHG98247.1;ACM09389.1;ACH70969.1;ACM08637.1;AHG98249.1;ACM08636.1;ACI69314.1;ACI67628.1;ACI68854.1;ADM15990.1;ACI69434.1	proteasome subunit alpha type-7 A-2, partial
23.9889	23.8486	23.3836	24.0603	24.1939	24.0807	23.8965	23.5316	24.0882	23.7737	23.946	23.7718	0	278430000	8	8	79	NP_001134566.1;ACN12398.1;ACN10051.1;ACI68025.1;ACI67516.1;ACI66145.1;ACH70978.1;ACH70977.1	60S ribosomal protein L15
24.2108	24.1531	24.17	24.7827	24.3931	24.6116	24.4723	24.2865	24.2102	24.7743	24.7006	24.3144	0	410910000	8	8	75	ACI70186.1;ACI68574.1;ACN12701.1;ACN12214.1;ACN10341.1;ACN09867.1;ACI69963.1;ACH70991.1;ACH70990.1;ACI67398.1;ACH70633.1;NP_001134948.1;ACI69609.1	60S ribosomal protein L8
24.1056	23.8435	23.9897	24.5651	23.9874	24.4824	24.3657	24.1231	23.9251	24.5237	24.5037	24.1272	0	360120000	8	8	109	ADM15920.1;ACN12179.1;ACN09832.1;ACI70016.1;ACI68342.1;ACI32985.1;ACH71011.1;ACH71010.1;ACI68452.1	40S ribosomal protein S5
21.4099	21.5144	20.981	21.6162	21.3723	21.4089	21.309	21.5806	21.2568	21.6224	21.5654	21.5765	0	52194000	8	8	34	ACH85269.1;ACN10996.1;ACI68908.1;ACN12452.1;ACN10104.1;ADM16230.1;ACI66263.1;ACI69519.1;ACI68459.1	proteasome (prosome, macropain) 26S subunit, ATPase 1a
24.094	24.0025	23.8648	24.3382	23.7947	24.4472	24.4116	24.1943	23.9886	24.3698	24.5997	24.2605	0	353900000	8	8	78	ACH85282.1;NP_001134778.1;AGH92557.1;ACI68837.1;ACI68828.1;ACN12290.1;ACN09943.1	ribosomal protein S19
22.5663	22.6758	22.9854	22.6417	22.6264	22.5078	22.7667	23.0512	22.9757	22.69	22.5027	22.3838	0	124480000	8	8	61	ACI33099.1;NP_001117025.1;CAD58715.1;CAD58716.1;ACN58706.1;ACN10920.1	Glutamate dehydrogenase 1, mitochondrial precursor
22.5916	22.663	22.1393	22.4123	22.7198	22.6198	22.4775	22.3893	22.7719	22.3348	22.6988	22.6714	0	109780000	8	8	77	NP_001133619.1;ACI33586.1;ACI66112.1	S-methyl-5-thioadenosine phosphorylase
21.309	21.2967	21.5257	21.9983	21.6412	21.679	21.636	21.5257	21.5676	22.082	22.1361	21.6603	0	61413000	8	8	36	ACI33707.1;ACI33496.1;ACI66548.1;ACI33032.1	Plasminogen activator inhibitor 1 RNA-binding protein
24.2687	24.1814	24.1135	23.8759	23.8501	23.7588	23.8071	23.6344	23.6126	23.5525	23.0575	24.0611	0	315680000	8	8	72	NP_001133727.1;B5X3B2.1;ACI33793.1	adipocyte plasma membrane-associated protein
21.7673	21.8027	22.145	22.322	22.473	21.8845	21.9326	21.9099	22.2376	22.8247	22.5792	22.5938	0	88492000	8	8	60	ACI33861.1;ACM08870.1;ABC94912.1	Cytochrome P450 3A27
23.2838	23.2953	23.2489	23.0055	23.0039	23.0321	23.0061	23.0923	22.9568	22.755	22.9212	23.0601	0	159940000	8	8	83	NP_001133946.1;ACI34192.1	Hsc70-interacting protein
25.8039	25.5133	25.4619	26.0892	25.7892	26.1673	26.0742	25.7533	25.8466	25.8968	26.3897	25.7548	0	1139000000	8	15	199	ACI34364.1;ACN60302.1	disulfide-isomerase A6 precursor
23.0414	23.783	23.0429	23.6048	23.3003	23.8521	23.9671	23.9363	23.6677	23.6046	23.0963	23.3022	0	227920000	8	8	75	NP_001134103.1;ADM16151.1;ACN12443.1;ACN10830.1;ACN10095.1;ACI66228.1	L-xylulose reductase
24.426	24.3402	24.4502	24.881	24.6503	24.7344	24.6681	24.3832	24.0863	24.5728	24.9208	24.4678	0	450760000	8	8	84	NP_001134152.1;ACN12558.1;ACN12248.1;ACN10204.1;ACN09901.1;ACI67802.1;ACI67691.1;ACI67024.1;ACI66403.1;ACN12377.1;ACN10030.1;ACI67100.1;ACI68991.1	60S ribosomal protein L10
28.8698	28.4998	28.2843	28.6617	29.5756	28.8989	28.0999	28.0595	29.0201	28.6395	28.4868	29.4648	0	8102700000	8	9	788	ACN12530.1;ACN12436.1;ACN12341.1;ACN10613.1;ACN10089.1;ACN09994.1;ACI70156.1;ACI70141.1;ACI69601.1;ACI68785.1;ACI67225.1;ACI66666.1;CAA65946.1;CAA65944.1;ACI68793.1	Hemoglobin subunit alpha-4
23.0535	23.2782	23.1592	23.0969	23.0211	22.9941	23.0242	23.1028	23.048	23.0716	23.0193	22.9954	0	162380000	8	8	77	NP_001134432.1;ADM16120.1;ACI67478.1	Proteasome subunit alpha type-5
23.0193	22.8027	23.0758	22.9272	23.1305	22.9608	23.1301	23.1663	23.399	23.1272	22.8728	23.0409	0	157010000	8	8	96	NP_001134438.1;ACI67513.1	Dehydrogenase/reductase SDR family member 4
24.4316	24.3132	24.3407	24.4742	24.0179	24.5546	24.7996	24.9185	24.6622	24.3928	23.9749	24.3412	0	429070000	8	9	109	ACI68808.1	S-adenosylmethionine synthetase isoform type-2
22.6354	22.6767	22.4665	22.4144	22.5673	22.5733	22.7622	22.6933	22.5598	22.1639	22.6151	22.3847	0	112420000	8	8	46	ACI69245.1;NP_001134497.1;ACI67756.1	hydroxypyruvate isomerase
22.9059	22.8104	22.4472	22.5555	22.9344	22.6411	22.453	22.7649	22.8159	22.3525	22.4292	22.9146	0	123660000	8	8	80	NP_001134988.1;ACN11202.1;ACI69757.1;NP_001133837.1;ACI33995.1	Ribose-phosphate pyrophosphokinase 2
23.4898	22.832	20.7739	22.5459	22.6999	23.3381	22.5536	22.6128	21.987	22.7824	23.4762	23.2511	0	137750000	8	8	67	NP_001135022.1;ACN12694.1;ACN10334.1;ACI69905.1	hydroxyprostaglandin dehydrogenase 15-(NAD)
23.2581	22.972	23.1588	23.7067	23.325	23.716	23.7067	23.0628	23.1994	23.5094	24.1706	23.1723	0	207400000	8	8	98	ACI69956.1	ARMET precursor
24.5527	24.5653	24.5188	24.2474	24.4082	24.6806	24.8833	24.6205	24.5999	24.4142	24.7572	24.7523	0	459190000	8	8	124	NP_001140026.1;ACM09621.1;ACM09301.1;ACM08306.1;ACM08550.1	Pterin-4-alpha-carbinolamine dehydratase
22.6853	22.4956	22.3791	22.407	22.4893	22.8431	22.4014	22.5799	22.9669	22.737	22.0898	23.1005	0	117040000	8	8	69	ACN12579.1;ACN10224.1;ACM08818.1;NP_001134359.1;ACI67207.1	Phenazine biosynthesis-like domain-containing protein 2
22.855	22.861	22.7764	22.5383	22.6359	22.7402	22.6525	22.6427	22.8273	22.7214	22.7389	22.7458	0	125390000	8	8	69	NP_001140074.1;ACM09512.1	ubiquitin carboxyl-terminal hydrolase isozyme L3
21.9878	21.8448	21.4128	21.6914	21.0457	21.8466	21.7789	21.83	22.1779	21.3918	22.1458	21.6396	0	64850000	8	8	46	NP_001158825.1;ACN10554.1	peroxisomal acyl-coenzyme A oxidase 3
21.9431	22.1252	21.2481	22.0874	21.7543	21.893	21.7848	21.8162	22.0296	22.1817	21.9651	22.2203	0	72742000	8	8	46	NP_001158877.1;ACN10660.1	Beta-centractin
20.7598	21.2283	21.0746	21.1467	21.2565	21.3617	21.2169	21.0521	21.0987	21.4363	21.5065	21.0237	0	43723000	8	8	21	NP_001167405.1;ACN10908.1	Heterogeneous nuclear ribonucleoprotein U-like protein 1
28.682	28.6115	28.3441	28.0607	28.2629	28.213	28.3936	28.3147	28.1349	28.1028	28.1105	28.6393	0	6202700000	8	19	654	ACN11051.1	L-lactate dehydrogenase B chain
22.1639	22.1314	22.3056	22.0221	22.1008	21.9783	21.9384	22.2481	22.2346	22.1608	22.0741	21.9163	0	81685000	8	8	63	NP_001167315.1;ACN11343.1	myelin expression factor 2
23.913	23.6936	24.0026	23.9254	23.908	23.6764	23.7492	23.9763	24.0396	23.6792	23.8396	23.3935	0	267320000	8	8	178	ACN11370.1;ACN60194.1;AAL29931.1	60 kDa heat shock protein, mitochondrial precursor
21.9677	21.8714	21.3052	21.6136	21.8535	21.9532	21.8316	21.9975	21.9305	21.2654	21.8129	21.6682	0	67071000	8	8	37	ACN58663.1	26S proteasome non-ATPase regulatory subunit 11
22.9567	22.8884	22.4328	22.9016	22.8413	22.9004	22.9672	22.8585	23.0037	22.5573	22.9423	22.7649	0	136420000	8	14	130	ACN58704.1	Serine/threonine-protein phosphatase 2A 65 kDa regulatory subunit A beta isoform
21.4281	21.6936	21.0349	21.3484	21.5306	21.9344	21.826	21.4359	21.2588	21.758	21.7946	21.248	0	55666000	8	8	39	ACN60223.1	Gelsolin precursor
23.3964	23.4013	23.5086	23.9839	23.6423	23.7242	23.5897	23.2883	23.1762	24.2483	23.9572	23.3861	0	239800000	7	7	74	NP_001134215.1;NP_001117003.1;ACI66641.1;ACH70998.1;AAD16877.1;ACN12355.1;ACN10008.1;ACN12250.1;ACN09903.1	40S ribosomal protein S15
23.1609	23.0624	23.4854	23.1355	23.0516	23.3002	23.0312	23.3126	23.5271	23.4446	23.2186	23.3185	0	182280000	7	7	93	ACH70612.1;ACI33582.1;ACN10759.1	malate dehydrogenase 1
22.729	22.4581	22.6978	22.7371	22.3375	22.7658	22.9625	23.0201	22.8546	22.526	22.5391	22.6397	0	133000000	7	7	74	NP_001133128.1;ACI32915.1;ACH70740.1	enoyl-CoA hydratase, mitochondrial precursor
24.4624	24.0042	24.0669	24.4061	24.0104	24.4561	24.3875	24.1023	24.1817	24.2337	24.5995	24.2767	0	367500000	7	7	92	NP_001134097.1;ACN12420.1;ACN11417.1;ACN10073.1;ACM08397.1;ACH70747.1;ACM09220.1;ACM08724.1;ACI66218.1	40S ribosomal protein S16
24.7192	24.6904	24.2776	25.064	24.6923	25.1256	24.9494	24.6078	24.5285	24.7062	25.2494	24.8335	0	533750000	7	7	95	ACI67293.1;ACI66314.1;ACI34164.1;ACH70774.1;ACI66988.1;ACI66768.1;ACN12304.1;ACN09957.1	40S ribosomal protein S7
22.3787	22.3495	21.921	22.2719	22.3786	22.5578	22.3378	22.1568	22.8356	22.8483	22.3982	22.5369	0	103630000	7	7	91	NP_001133150.1;ACI68114.1;ACI67381.1;ACH70803.1;ACI67573.1	ATP synthase subunit gamma, mitochondrial
24.1258	24.0147	24.1362	24.662	24.0681	24.4095	24.3815	24.063	23.9354	24.651	24.6353	24.3645	0	373000000	7	7	85	AGH92638.1;ACN12423.1;ACN12315.1;ACN10570.1;ACN10076.1;ACN09968.1;ACI68814.1;ACI67044.1;ACI33750.1;ACH70851.1;ACN10694.1	ribosomal protein L17
23.5996	23.3872	23.4169	23.8908	23.4296	23.7894	23.8448	23.5236	23.5506	24.032	24.2097	23.706	0	268990000	7	7	79	NP_001134254.1;NP_001133208.1;ACN12165.1;ACN09818.1;ACI66811.1;ACH70996.1;ACH70995.1;ACN12313.1;ACN09966.1	40S ribosomal protein S14
24.2265	24.0339	24.2007	24.5225	24.2314	24.4998	24.3788	24.1178	23.8231	24.6305	24.6771	24.2881	0	381670000	7	7	81	ACH85306.1;NP_001134773.1;ACN12269.1;ACN09922.1;ACI68827.1;ACN12673.1;ACN10313.1	ribosomal protein L23a
21.4361	21.6361	21.7324	21.2964	21.582	21.6622	21.6705	21.8275	22.1145	21.7491	21.694	21.661	0	54602000	7	7	30	NP_001135191.1;ACI33082.1	isovaleryl-CoA dehydrogenase, mitochondrial
21.6604	21.3853	21.3235	21.8482	21.4682	21.7254	21.782	21.448	21.2179	21.8631	22.0516	21.603	0	59235000	7	7	34	NP_001133435.1;ACI33227.1	protein disulfide-isomerase A5 precursor
23.0101	22.9382	23.246	23.0624	22.9171	23.0457	23.2554	23.1695	23.0095	23.0905	22.9587	23.1818	0	161580000	7	11	97	ACI33289.1	Dihydrolipoyl dehydrogenase, mitochondrial precursor
22.0971	22.1007	22.126	21.9719	22.004	22.0479	21.9852	22.0663	21.7581	22.1416	22.1842	22.0501	0	89403000	7	7	51	NP_001133499.1;ACI33355.1	Far upstream element-binding protein 3
21.0623	21.3276	21.1629	21.059	20.488	20.8859	21.1685	20.941	20.7115	20.8259	20.7857	21.067	0	38060000	7	7	24	NP_001135218.1;ACI33405.1	Vacuolar ATP synthase subunit B, brain isoform
22.6843	22.3736	22.3029	23.1041	22.9827	23.0983	22.8971	22.4573	22.6468	23.1502	23.6127	22.7907	0	138310000	7	7	60	ACN10934.1;ACI33422.1	disulfide-isomerase A6 precursor
22.3766	22.3186	22.4031	21.8273	22.5299	21.8524	22.3808	22.4239	22.7054	22.3997	21.7531	22.5996	0	94557000	7	7	61	NP_001133559.1;ACI33477.1	tripeptidyl-peptidase 1 precursor
21.7912	21.7656	22.139	22.0108	21.6984	21.737	21.9232	22.0781	21.8322	21.7091	21.6611	21.8916	0	69903000	7	7	33	ACI33481.1;ACI33023.1	Aspartate aminotransferase, mitochondrial precursor
20.702	20.1042	20.3657	20.49	20.0215	20.3179	20.6833	20.3428	20.3513	20.1894	20.2926	20.2504	0	24340000	7	7	11	ACN12775.1;ACN10410.1;ACI33487.1	NADH dehydrogenase flavoprotein 1, mitochondrial precursor
22.2021	22.9266	22.0641	22.9436	23.0538	22.2634	22.2253	22.3934	22.5397	22.8927	22.2518	22.4386	0	107970000	7	7	37	ACN12738.1;ACN10827.1;ACN10376.1;ACM09819.1;ACM08390.1;ACI33883.1	Glyceraldehyde-3-phosphate dehydrogenase
22.1397	22.0108	22.3077	22.0214	22.2957	22.1105	22.2106	22.1198	22.5275	22.1948	22.1234	22.2093	0	84794000	7	7	63	ACI34116.1	Pyruvate dehydrogenase E1 component subunit beta, mitochondrial precursor
24.5293	24.7101	23.8116	24.4543	24.8925	24.6048	24.3996	24.5312	24.7459	24.7935	24.6521	24.854	0	464650000	7	7	70	NP_001133919.1;ACI34140.1;ACI66619.1	lambda-crystallin homolog precursor
22.732	22.8224	21.7195	23.5281	22.3436	23.4707	23.4947	23.2929	22.4428	23.0955	23.4251	23.4297	0	169650000	7	7	68	NP_001134099.1;ACI66224.1	multiple coagulation factor deficiency 2 precursor
26.1457	25.6289	23.5127	25.5461	25.7328	25.14	24.7238	25.9106	25.4079	25.8168	26.0379	26.3783	0	961290000	7	7	182	ACI69906.1;ACI66303.1;ACI69211.1;NP_001117050.1;AAR91708.1	Fatty acid-binding protein, heart
24.8736	25.2349	24.3562	24.5908	25.3139	24.8147	24.7441	25.2632	26.1559	25.4527	24.7263	25.4293	0	669180000	7	7	209	ACN12226.1;ACN10848.1;ACN09879.1;ACI67050.1;ACI66363.1;ACI68689.1;ACI68886.1;ACM09231.1	Ependymin precursor
24.6268	24.1301	24.1567	24.8319	24.1806	24.5933	24.6849	24.7012	24.4527	24.6217	24.5292	24.2619	0	430950000	7	12	136	ADM15907.1;ACI67091.1;ACN12449.1;ACN10101.1;ACI69327.1;ACI67623.1;ACH71014.1;ACN11489.1;ADM15966.1;ACI68775.1	ADP/ATP translocase 2
22.098	22.2244	22.1551	21.7068	22.081	21.9501	22.1644	22.2928	22.0873	21.5833	21.7205	22.1998	0	88290000	7	7	38	ACN10456.1;ACI67269.1;NP_001134747.1;ADM16187.1;ACI68690.1;ACM09703.1;ACM09289.1	Probable thiopurine S-methyltransferase
23.695	23.4294	23.3907	23.8371	23.3551	23.794	23.7023	23.3262	23.4423	23.4761	23.6116	23.6738	0	225100000	7	10	104	ACI67534.1	Peroxiredoxin-4
23.5591	23.1766	23.1359	24.005	23.7127	23.7339	23.6586	23.431	23.6209	23.3985	24.0603	23.463	0	229630000	7	7	72	AGH92632.1;ADM16179.1;ACM08327.1;ACI68686.1;ACI68306.1;ACI67791.1;ACI69381.1;ADM15989.1;ACI67204.1;ACN12639.1;ACN10281.1	translationally-controlled tumor like protein
24.2671	24.1789	23.8783	24.2496	23.9501	24.3961	24.3373	24.3395	24.0867	23.9641	24.4817	24.2261	0	355500000	7	7	128	NP_001134624.1;ACI68253.1	histamine N-methyltransferase
25.1077	25.4801	25.2823	24.8919	24.9859	25.15	25.2008	25.2277	24.9266	24.746	24.813	25.3527	0	675090000	7	7	123	ACI69603.1;ACI68362.1;AAB20709.1;ABD14400.1	Glutathione S-transferase P
20.0433	20.5387	20.3388	20.1064	19.8197	20.5788	20.7516	19.8267	20.0599	21.1122	23.839	20.5102	0	45016000	7	7	8	ACI68507.1;ACI69590.1;ACN12611.1;ACN10994.1;ACN10255.1;ACI69810.1;ACI69326.1;ACI67916.1;ACI67052.1;ACI66408.1	Leukocyte cell-derived chemotaxin 2 precursor
22.6885	22.5491	22.827	22.4041	22.6543	22.6591	22.2915	22.3697	22.6946	22.148	22.638	22.4135	0	107810000	7	8	75	NP_001134815.1;ACN12493.1;ACN10142.1;ACI69013.1	14-3-3 protein zeta
27.9342	28.1369	28.0111	28.1025	27.7487	27.631	27.8412	28.1037	27.9898	27.5206	27.3031	27.955	0	4495900000	7	14	329	ACN12309.1;ACN09962.1;ACI70112.1;ACI69773.1;ADM16185.1;ACI68586.1;AH003813.1;;AAB20708.1	Glutathione S-transferase P
24.0367	24.0179	23.694	23.8134	23.8576	23.8469	23.8241	23.8242	23.8281	23.5695	23.4392	23.9155	0	268430000	7	7	85	NP_001139831.1;ACM08229.1	Membrane-associated progesterone receptor component 1
20.3319	20.9708	19.389	20.3889	21.3429	20.9807	21.1947	21.0702	22.1929	20.8374	20.7137	21.5111	0	39393000	7	7	40	NP_001158753.1;ACN12587.1;ACN10232.1	D-amino-acid oxidase
23.0768	23.1331	22.9495	22.7908	23.1517	23.1422	22.9698	23.0591	23.1383	22.9797	23.4385	23.1288	0	159330000	7	7	87	ACN12602.1;ACN10247.1;NP_001133762.1;ACI33856.1	Alpha-enolase
22.0369	21.984	22.2794	22.1438	22.3531	21.768	21.6001	22.4737	22.1347	21.9756	21.9735	22.044	0	79743000	7	10	43	NP_001167391.1;ACN10700.1;NP_001133181.1;B5DGM7.1;ACH70904.1;ACH70901.1;ACH85353.1;ACH70903.1	fructose-bisphosphate aldolase A
21.3169	21.3911	21.1009	21.144	21.0541	21.2402	21.134	21.2902	21.2379	20.7364	21.2799	21.2031	0	42783000	7	7	22	ACN10737.1;ACN58635.1	Vacuolar protein sorting-associated protein 35
22.5862	22.3225	22.3669	22.3833	22.325	22.4102	22.4567	22.4424	22.3685	22.4183	22.1347	22.3561	0	98854000	7	7	66	ACN11364.1;ACI66206.1	Actin-related protein 3
20.2755	20.4025	20.2705	20.2216	20.8179	20.3479	20.2285	20.2482	19.9642	20.7666	20.2223	20.2409	0	24350000	7	7	16	ACN58737.1	Spectrin alpha chain, brain
21.438	21.3839	21.1079	21.7255	22.1212	21.218	21.3011	21.9031	21.517	21.1518	21.3286	21.3351	0	53029000	7	7	23	CAA57449.1	apolipoprotein B
23.6123	23.1822	23.257	23.4664	23.6231	23.6586	23.6577	23.3773	23.2909	23.7881	23.6105	23.2909	0	212400000	6	6	52	O57561.1;NP_001116999.1;ADM15926.1;ACI69714.1;ACI66940.1;ACI66513.1;ACI66120.1;ACH70788.1;AAC03021.1;ACN12709.1;ACN10349.1;ACN12415.1;ACN10068.1	RL18A_SALSA RecName: Full=60S ribosomal protein L18a;>gi
22.3808	22.3708	22.0511	21.8151	22.2186	22.0991	22.2986	22.1945	22.1757	22.013	21.8842	22.3781	0	85914000	6	6	40	ACI69371.1;ACH70628.1;NP_001116995.1;BAB84671.1	DJ-1
21.3489	20.5989	21.0473	21.1017	20.9149	21.4161	21.719	21.3337	21.9512	22.0291	22.4645	21.4394	0	54299000	6	6	32	ACN10838.1;ACH70630.1	Cathepsin D precursor
23.2855	23.1621	23.2687	23.0371	23.7244	23.4293	22.9189	22.5971	23.7073	23.6377	23.3488	23.2102	0	181030000	6	6	96	ACH70631.1;NP_001139879.1;ACM08456.1	SET translocation (myeloid leukemia-associated) B
22.0781	22.3582	22.5068	22.791	22.1986	22.6016	22.1952	22.4882	22.148	22.2875	22.7846	22.4876	0	102380000	6	6	38	NP_001134430.1;B5DG42.1;ACI67470.1;ACH70716.1	eukaryotic initiation factor 4A-III
25.493	25.2744	25.2181	25.2313	25.2826	25.208	25.4468	25.4229	25.2502	25.3825	25.3736	25.3616	0	768320000	6	9	114	NP_001133149.1;ACH70800.1	non-metastatic cells 1 protein
26.241	26.1372	25.9336	26.1775	26.0999	26.1171	26.205	26.2295	26.1615	25.8146	25.9747	26.0891	0	1315600000	6	18	319	NP_001133158.1;ACN10896.1;ACH70822.1	tubulin alpha-4A chain
21.7649	22.0448	21.8261	21.8873	21.81	22.0098	22.0547	22.1579	21.9574	21.72	21.7398	21.8277	0	72250000	6	6	26	NP_001134515.1;ACI68613.1;ACI67926.1;ACI67836.1;ACI67729.1;ACH70835.1;ACM08481.1;ACI67215.1	Proteasome subunit alpha type-4
21.4749	21.1851	20.1451	21.2213	21.396	21.8078	21.3212	21.0676	22.1752	21.2346	21.3513	21.3355	0	48070000	6	6	34	NP_001133172.1;ACN12766.1;ACN10401.1;ACI70144.1;ACI68356.1;ACH70876.1;ACI67947.1	eukaryotic translation initiation factor 3 subunit M
22.1154	22.206	22.1269	22.5307	22.1844	22.3148	22.5866	22.0737	22.3245	22.6516	22.3908	22.5618	0	96952000	6	6	43	ACI70071.1;ACH70889.1;ACI68911.1;ACI67147.1;ACI67860.1;ACI66312.1	FK506-binding protein 2 precursor
23.4833	23.2027	23.2728	23.9127	22.9957	23.6775	23.6687	23.4002	23.146	23.9524	24.1001	23.5374	0	226640000	6	6	79	ACI69507.1;ACN12584.1;ACN12199.1;ACN10229.1;ACN09852.1;ACI67025.1;ACH70975.1;ACI69173.1;NP_001133205.1;ACN12174.1;ACN09827.1;ACH70976.1;ACM08331.1	60S ribosomal protein L10a
23.6483	23.2526	23.5002	23.7403	23.7549	23.8372	23.6378	23.1997	23.621	23.8028	23.8385	23.3836	0	229270000	6	6	51	NP_001133209.1;ACN12360.1;ACN10013.1;ACI69871.1;ACI69612.1;ACH71000.1;ACH70999.1;ACN12368.1;ACN10021.1;ACI69986.1	ribosomal protein S23-1
23.1815	22.8803	23.3056	23.8219	23.15	23.3438	23.3307	23.1381	23.159	24.02	23.7541	23.2775	0	205640000	6	6	46	ACN12337.1;ACN09990.1;ACI69455.1;ACI66523.1;ACH71013.1;ACH71012.1;ACI32935.1	40S ribosomal protein S6
21.6216	21.4441	21.798	21.4834	21.7353	21.0257	21.4427	21.277	21.6985	21.5724	21.5527	21.4916	0	53875000	6	6	34	NP_001239278.1;ACI34003.1;ACH71029.1;ACI34280.1	voltage-dependent anion-selective channel protein 2
21.91	22.003	21.5899	21.9457	21.7874	21.9669	21.7337	22.081	21.8426	21.8463	22.0137	21.8083	0	70740000	6	6	58	ACH85257.1;NP_001134354.1;ACI67191.1	proteasome (prosome, macropain) 26S subunit, ATPase, 6
21.7533	21.9278	21.9266	21.8029	21.9839	21.7633	21.884	21.8928	21.9422	21.744	21.982	21.5925	0	68119000	6	6	40	ACH85299.1;AGH92509.1;ACM09015.1;ACM08758.1;ACM08263.1;ADM16042.1;ACI67172.1	proteasome (prosome, macropain) subunit beta type 5
21.6021	21.4192	22.0759	21.3555	21.3874	21.7022	21.3402	21.3294	21.5618	21.4346	21.8518	21.3321	0	55264000	6	6	14	ACH85319.1	far upstream element (FUSE) binding protein 3
26.7213	26.6925	26.9544	26.7285	26.4612	26.5585	26.8994	26.9663	26.7057	26.6016	26.4242	26.6216	0	2005200000	6	24	408	NP_001117108.1;CAD58714.1;ACI32916.1	glutamate dehydrogenase
22.3563	22.3203	22.3262	22.4614	22.6051	22.4188	22.3178	22.3752	22.5103	22.4077	22.6985	22.1084	0	96712000	6	6	62	ACI32918.1;ACI33959.1	Heterogeneous nuclear ribonucleoprotein A0
20.8258	20.357	20.3762	20.9197	20.1899	21.1644	20.5014	20.7028	20.182	20.8919	21.1992	20.8716	0	31541000	6	6	19	NP_001133289.1;ACI32979.1	Phenylalanyl-tRNA synthetase beta chain
21.4793	21.2638	21.2288	21.3536	21.737	21.5827	21.3936	21.3351	21.5982	21.4818	21.6438	21.5663	0	52085000	6	6	48	NP_001133340.1;ACI33054.1	splicing factor, proline- and glutamine-rich
22.5476	22.4961	22.4524	22.3629	22.4286	22.5143	22.6924	22.4854	22.6149	22.4949	22.4447	22.4556	0	107230000	6	6	53	NP_001133347.1;ACN10439.1;ACI33070.1	Eukaryotic translation initiation factor 4H
21.6687	21.5852	21.8705	21.7677	21.7714	21.6361	21.8075	21.8093	22.1209	21.4446	21.5279	21.6042	0	62252000	6	6	37	ACI33113.1;NP_001167080.1;ACN10756.1;ACI67354.1;ADM15901.1;ACI67072.1	Serine/threonine-protein phosphatase 2A catalytic subunit beta isoform
22.2488	21.8772	22.2854	22.2511	21.9666	22.1592	22.3999	22.0982	22.2649	22.2214	22.1753	22.0144	0	84738000	6	6	49	ACI34263.1;NP_001133381.1;ACI33123.1;ACH85345.1	PolyrC-binding protein 2
24.3356	24.2646	24.4287	24.2661	23.7511	24.2191	24.3511	24.9357	24.1296	24.0637	23.8942	24.0868	0	377860000	6	6	75	ACN10793.1;ACI33161.1	S-adenosylmethionine synthetase isoform type-2
21.8444	21.7572	21.7061	21.9898	21.7526	21.7365	21.4926	21.6856	21.9715	21.5399	22.1016	21.6015	0	63463000	6	6	39	ACN10990.1;ACI33460.1;ACI67845.1;ACI66798.1;ADM15939.1;ACI67584.1	Galectin-9
21.4776	21.4623	21.9344	21.5135	21.2724	21.4376	21.7737	21.792	21.3545	21.1061	21.6633	21.4312	0	55328000	6	6	38	ACI33497.1	Isovaleryl-CoA dehydrogenase, mitochondrial precursor
23.2475	23.0984	23.3518	23.1061	23.0117	22.9458	23.0279	23.0887	23.3344	23.1917	22.8691	23.2068	0	165260000	6	9	73	ACI33557.1;NP_001133093.1;ACH70681.1	Voltage-dependent anion-selective channel protein 2
20.1249	20.2982	20.7564	20.5296	20.7293	20.2427	20.2232	20.7305	20.076	21.046	20.4887	20.6925	0	26702000	6	6	27	ACI69437.1;ACI66793.1;ACI33725.1;ADM16236.1;ACN10614.1;ACI68077.1;ACI66078.1;ACI34051.1;ACH70802.1;ACI68631.1;ACI33360.1;ACI67900.1;ACI69279.1;ACI67301.1;NP_001134434.1;ACI67495.1	Transforming protein RhoA precursor
20.8434	20.9637	20.5189	21.3389	20.6087	20.6866	20.4181	20.5998	20.6718	20.5564	21.3737	20.5075	0	33306000	6	6	15	NP_001133738.1;ACI33812.1	glucosamine--fructose-6-phosphate aminotransferase [isomerizing] 1
20.8251	20.7772	20.901	20.5394	20.7439	20.9564	20.8505	21.1183	20.6684	20.5985	20.6646	20.5584	0	33038000	6	6	17	ACI34035.1	Methylcrotonoyl-CoA carboxylase subunit alpha, mitochondrial precursor
21.8586	21.8372	21.4447	21.5245	21.7828	21.6173	21.5584	21.4278	21.6041	21.5218	21.8131	21.5171	0	58218000	6	6	34	NP_001133912.1;ACI34130.1	septin-2
20.5099	20.1899	20.8566	20.4859	20.7545	20.6371	20.7278	20.3752	20.7234	20.9763	20.6883	20.6532	0	28431000	6	6	24	ACI34143.1	Electron transfer flavoprotein-ubiquinone oxidoreductase, mitochondrial precursor
22.0683	21.9566	21.9264	22.315	21.9714	22.1533	21.9831	21.257	21.9521	22.142	22.4115	21.7711	0	74702000	6	7	41	B5X4E0.1;ACI34171.1	CALUB_SALSA RecName: Full=Calumenin-B;Flags: Precursor;>gi
21.676	21.5009	22.9463	21.0882	21.7513	21.286	21.5802	20.6066	21.7255	21.7264	NaN	NaN	0	57133000	6	6	11	ACI34208.1	RNA-binding protein 4B
22.4254	22.7135	21.9021	22.4053	22.3597	22.4971	22.2475	22.3987	22.3102	22.153	22.3626	22.3308	0	97718000	6	6	55	ACI69555.1;ACI69536.1;ACI68541.1;ACI67206.1;ACI66503.1;ACI66157.1;ACM08560.1;ACI67720.1;ACI67245.1;ADM16029.1;ACI67578.1;ADM16199.1;ACM08632.1;ACI69785.1;ACI66537.1	Proteasome subunit alpha type-2
22.209	22.2922	22.3786	21.6974	21.5992	21.9576	22.1805	22.178	21.61	21.4425	21.7723	21.9362	0	76629000	6	6	48	ACI66176.1;AGH92554.1	Peroxiredoxin-5, mitochondrial precursor
23.6545	23.2365	23.272	23.9587	23.2317	23.8102	23.8975	23.5393	23.5857	23.6034	24.025	23.573	0	237600000	6	6	58	AGH92594.1;ADM16118.1;ACN12172.1;ACN09825.1;ACI66235.1;ACI68880.1	ribosomal protein L30
25.2366	25.4127	25.3349	25.5505	25.5229	25.2981	25.3178	25.5541	25.5718	25.1708	24.8824	25.215	0	785320000	6	6	162	ADM16163.1;ADM16142.1;ACM09416.1;ACM09169.1;ACM09056.1;ACM08641.1;ACM08478.1;ACI68074.1;ACI66497.1;ACM08490.1;ACM08562.1;ACM09596.1;ACM09260.1;ACM09552.1;ACM08788.1;ACM08958.1;ACM08955.1;ACM08373.1;ACM08445.1;ACI69156.2;ADM16262.1;ADM15916.1;ACM09755.1;ACM09408.1;ACM09205.1;ACM09191.1;ACM09155.1;ACI69512.1	Thioredoxin
20.9608	21.2131	21.1937	21.0714	20.8106	20.9742	21.2185	21.4151	20.8454	20.7909	21.0754	21.0294	0	40270000	6	6	21	NP_001134320.1;ACI67047.1	Quinone oxidoreductase
22.1765	22.1688	22.1485	22.4466	22.2778	22.4893	22.5585	22.5745	22.9551	22.299	22.2592	22.4522	0	100410000	6	6	79	ACI67321.1;ACI68972.1;ACI70100.1;ACI68654.1;ACI66352.1;ADM16091.1;ACI68190.1	Hydroxyacyl-coenzyme A dehydrogenase, mitochondrial precursor
21.2062	20.9704	20.6879	21.2971	20.9167	21.2363	20.9492	20.9251	20.9291	20.8048	21.3705	21.0676	0	39594000	6	6	26	NP_001134479.1;ACI67690.1;ACI68753.1	Haloacid dehalogenase-like hydrolase domain-containing protein 1A
25.1676	24.8388	25.7177	24.122	24.7891	24.8478	24.8429	24.9267	25.1791	24.6068	24.7171	24.7828	0	571690000	6	7	86	NP_001134489.1;ACN12713.1;ACN10353.1;ACI67728.1	Ribonuclease UK114
21.5897	21.5415	21.8971	21.5433	21.7624	21.7659	21.7375	21.7741	21.8955	21.8946	21.4362	21.5371	0	61894000	6	6	41	NP_001134615.1;ACI68197.1	Heterogeneous nuclear ribonucleoprotein A3 homolog 2
21.8505	21.7972	21.8933	21.7467	21.9849	21.7074	22.0158	21.9075	21.8901	21.5687	21.8337	21.6885	0	67167000	6	6	54	NP_001135087.1;ACN10949.1;ACI70157.1;ACI69428.1;ACI68864.1;ACI69139.1	14-3-3 protein beta/alpha
23.9435	23.8295	23.5847	23.6665	23.6642	23.6652	23.839	23.7952	23.6759	23.5516	23.866	23.665	0	252550000	6	6	103	NP_001134859.1;ACI69178.1;ACI67281.1;ACI70133.1;ACM09052.1	Dihydropteridine reductase
21.8694	21.6574	22.147	21.7603	21.5666	21.8792	22.0393	21.9947	21.7285	21.7627	21.5589	21.7556	0	68926000	6	6	43	NP_001134867.1;ACI69216.1	NipSnap homolog 3A
22.8774	22.8735	23.3749	23.6152	23.1474	23.4037	23.2754	22.9891	23.5146	23.4604	23.4242	23.1967	0	179010000	6	6	55	ACI69875.1;ACI69565.1	canopy-1 precursor
20.9708	21.4941	20.6898	20.9599	20.8567	21.1448	21.1073	21.4155	20.9852	21.1978	20.9313	21.1571	0	41214000	6	6	38	ACI70132.1;ACI69997.1;ACI69849.1	methyltransferase Mb3374
24.4906	24.2458	23.821	24.3108	24.2014	24.4365	24.3937	24.0938	24.131	24.2117	24.6143	24.2201	0	367850000	6	10	91	ACM09177.1;ACM08963.1;ACM08363.1;ACM09443.1;ACN11093.1	Elongation factor 1-delta
22.4805	22.1772	22.3319	22.3328	22.3683	22.6429	22.4191	22.1737	22.5154	22.4926	22.682	22.4682	0	99489000	6	7	57	ACM08449.1;ACN11434.1;ACN12741.1;ACN10379.1;NP_001134633.1;ACI68281.1	Acidic leucine-rich nuclear phosphoprotein 32 family member B
22.0642	22.2133	21.6404	21.7732	21.9251	21.7227	22.0763	22.4152	22.0608	21.742	22.2058	22.2483	0	78670000	6	6	56	ACM09410.1;ACM08802.1	15-hydroxyprostaglandin dehydrogenase
21.093	21.1874	20.956	20.7474	21.2015	21.0419	21.0224	21.0052	21.0249	21.1663	21.0584	21.1354	0	39905000	6	6	32	NP_001140068.1;ACM09477.1	6-phosphogluconolactonase
25.7273	24.7543	24.5324	24.615	25.6048	25.8351	24.5485	24.7461	25.716	24.7776	23.5616	25.5213	0	637980000	6	6	142	ACN12759.1;ACN12255.1;ACN10396.1;ACN09908.1	Hemoglobin subunit alpha-4
19.0977	19.4714	19.7047	19.9089	19.6983	19.1274	19.4194	20.7587	19.8092	21.0871	20.5236	20.8348	0	20690000	6	6	23	ACN10482.1	Fatty aldehyde dehydrogenase
20.2643	20.2552	20.1417	20.9687	20.1155	20.9581	20.3494	20.2773	19.8812	20.9957	21.3639	20.4236	0	28482000	6	6	19	NP_001158815.1;ACN10526.1	Leucyl-tRNA synthetase, cytoplasmic
22.0674	21.961	21.5526	22.109	21.703	22.0196	21.9164	22.0174	21.688	22.0756	22.3014	21.909	0	74423000	6	6	42	NP_001158828.1;ACN10563.1	obg-like ATPase 1
25.0872	24.9715	23.936	24.3903	24.1898	24.5979	24.7894	24.8521	24.6611	24.254	24.4859	24.7896	0	476050000	6	8	89	NP_001167051.1;ACN10690.1;ACN60257.1	glycogen phosphorylase, brain form
21.7348	21.6167	21.4011	21.3054	21.3322	21.4622	21.3767	21.4031	21.3706	21.5798	21.5864	21.3796	0	51974000	6	6	42	ACN10691.1;ACN10624.1;ACN10558.1;ACN58685.1	Actin-related protein 2-A
NaN	20.4834	20.4585	20.3543	NaN	NaN	NaN	20.3815	NaN	20.2312	20.2971	NaN	0	24836000	6	6	8	NP_001167117.1;ACN10870.1	Pyridoxal phosphate phosphatase
21.2652	21.3324	21.0344	21.4852	21.07	21.5259	21.4712	21.3608	20.9755	21.5008	21.6542	21.4009	0	49328000	6	6	29	NP_001167139.1;ACN10919.1	Eukaryotic translation initiation factor 2 subunit 3
21.42	21.3827	21.3217	21.1624	21.475	21.5161	21.3484	21.4961	21.5154	21.3317	21.3713	21.1825	0	49012000	6	6	25	NP_001167408.1;ACN10947.1	Selenide, water dikinase 1
20.5778	20.7756	20.7453	20.5564	20.7007	21.1822	20.7707	21.2075	20.8712	20.8685	20.8829	21.0406	0	34827000	6	6	47	ACN11180.1	3-hydroxyisobutyryl-CoA hydrolase, mitochondrial precursor
19.9054	20.4998	20.1713	20.5072	20.3781	20.5622	20.109	20.3572	20.2847	20.8538	20.776	20.5681	0	25574000	6	6	36	ACN11426.1;ACM09839.1	DnaJ homolog subfamily A member 2
21.4407	21.6287	21.728	21.129	21.3079	20.8142	21.7295	21.7709	21.8079	20.2264	20.5471	21.5396	0	50144000	6	6	29	NP_001167374.1;ACN11503.1;NP_001139926.1;ACM08726.1	EF-hand domain-containing protein D2
22.7187	22.6213	22.28	22.3041	22.3824	22.6327	22.5135	22.6507	22.787	22.3831	22.4811	22.5281	0	110480000	6	6	46	ACN58661.1;NP_001134756.2;ACM08254.1;ACI68727.2	Ubiquitin-conjugating enzyme E2 L3
21.3964	20.4355	20.3904	21.0563	22.2286	21.5213	20.6574	21.1036	21.7532	20.4861	20.8311	21.808	0	44260000	6	6	23	ACN58675.1	Band 3 anion exchange protein
26.7637	26.8234	27.1811	26.9387	26.8112	26.5037	26.8529	27.1598	26.8288	26.5391	25.8287	26.5438	0	2067300000	6	32	419	Q03156.1;NP_001117164.1;CAA43187.1	ALBU2_SALSA RecName: Full=Serum albumin 2;Flags: Precursor;>gi
20.8907	20.5703	20.333	20.687	20.8962	20.6911	21.0548	20.6072	20.9015	21.0173	21.4177	20.763	0	33290000	6	6	36	NP_001117104.1;CAB64714.1	antithrombin protein precursor
20.968	20.9625	21.4759	21.0336	20.8352	21.0598	21.0259	21.1614	20.972	21.2408	20.7784	20.8823	0	39855000	5	5	31	3MGW;4G9S;ACI67904.1;CAM35431.1;ACN12555.1;ACN12198.1;ACN10201.1;ACN09851.1;ACI69429.1;ACI67766.1;ACI67565.1;ACI69359.1;ACI68650.1;ACI68608.1;ACI69019.1;CAJ90904.1	A Chain A, Thermodynamics And Structure Of A Salmon Cold-active Goose-type Lysozyme;>gi
26.8249	27.1072	26.6118	26.5808	26.6421	26.7801	26.6584	26.5092	26.4102	26.4453	26.6447	26.5866	0	1943200000	5	5	119	NP_001117059.1;ACM09773.1;ACM09728.1;ACM09588.1;ACM09311.1;ACM09095.1;ACM08982.1;ACM08805.1;ACM08671.1;ACM08642.1;ACM08615.1;ACM08531.1;ACM08480.1;ACH70820.1;AAW59361.1;ACM08289.1;ACM08323.1	superoxide dismutase
24.0037	23.7485	23.5814	24.3924	23.4413	24.1844	24.2747	23.9548	23.5904	24.3299	24.5877	23.9643	0	318120000	5	5	55	NP_001133064.1;ACN12407.1;ACN10060.1;ACH70620.1;ACN12219.1;ACN09872.1;ACN12245.1;ACN09898.1;ACI68872.1;ACI68760.1	40S ribosomal protein S13
21.1128	21.081	20.9278	21.1788	21.1766	21.4432	21.5214	21.5441	21.6449	21.3382	21.7055	21.4519	0	55061000	5	5	26	NP_001135150.1;ACH70642.1	phosphomannomutase 2
26.1934	26.0279	26.1899	25.9904	25.7546	25.9882	25.9365	25.8676	26.1277	25.8308	25.849	25.9955	0	1225100000	5	5	51	ACI66158.1;ACH70673.1;ACI68270.1;ACI68499.1	Lactoylglutathione lyase
20.5978	20.5897	21.2051	20.4549	20.6841	20.5768	20.573	20.7344	20.4559	20.8755	20.7548	20.3042	0	30001000	5	5	18	ACI33768.1;ACH70753.1;ACM09808.1;ACM09822.1;ACM09524.1	RNA-binding protein 4B
23.6436	23.7665	24.091	24.2046	24.0085	24.083	24.0771	24.2109	23.9371	24.3098	24.1516	23.974	0	316170000	5	5	60	NP_001133144.1;ACH70787.1;ACM09663.1;ACM09432.1	heat shock protein 10
20.7664	20.8067	20.367	20.6532	20.4323	20.7508	20.357	20.5997	20.3539	20.2459	20.6825	20.6743	0	29255000	5	5	27	ACH70809.1;ACI66810.1	actin related protein 2/3 complex subunit 2
23.5339	23.1899	23.1343	23.5617	23.3362	23.6934	23.5352	23.0654	23.1242	23.5592	23.7216	23.286	0	203760000	5	5	46	ACI69812.1;ACI67887.1;ACI67159.1;ACI66094.1;ACH70846.1;ACN12403.1;ACN10056.1;ACI68053.1;ACI68412.1;ACI70128.1	40S ribosomal protein S10
23.2107	23.1316	23.458	23.7154	23.435	23.5511	23.6604	23.2255	22.9281	23.7981	23.6665	23.1305	0	208590000	5	5	47	NP_001133164.1;ACN12523.1;ACN10170.1;ACH70849.1;ACN12395.1;ACN10048.1	60S ribosomal protein L34
24.4967	24.2525	24.4706	24.6267	24.3832	24.669	24.5204	24.1837	24.2318	24.7344	24.8992	24.4659	0	433110000	5	5	77	AGH92503.1;ACN12526.1;ACN12284.1;ACN10173.1;ACN09937.1;ACI67712.1;ACI66620.1;ACH70866.1;AGH92514.1;ACN12364.1;ACN10017.1;ACI69780.1;ACI68693.1;ACI66416.1;ACI69593.1;ACI68348.1	ribosomal protein S25
23.5978	23.538	23.008	24.2058	23.2984	23.8112	23.6785	23.7083	23.1547	23.9674	24.241	23.9502	0	258090000	5	5	73	NP_001133168.1;ACN12372.1;ACN10025.1;ACM08571.1;ACI68145.1;ACI66868.1;ACH70867.1;ACN12380.1;ACN10033.1	60S ribosomal protein L38
23.3109	23.302	23.1902	22.9049	22.9394	23.1004	23.1491	23.1725	22.9236	22.6887	22.942	23.032	0	175300000	5	5	38	NP_001133197.1;NP_001133196.1;ACN12610.1;ACN10254.1;ACH70947.1;ACH70946.1;ACI66333.1;ACI67479.1	isocitrate dehydrogenase 2-2 (NADP+), mitochondrial
23.6239	23.4578	23.4594	24.1857	23.3975	24.0367	23.8501	23.6694	23.5866	23.8259	24.2375	23.9095	0	270380000	5	5	49	AGH92600.1;AGH92535.1;ACN12342.1;ACN09995.1;ACI69491.1;ACI66749.1;ACH70980.1;ACH70979.1;ACI66691.1	ribosomal protein L21-2
23.0418	22.797	23.043	23.242	23.0803	23.3247	23.1099	22.8129	23.0828	23.3101	23.4015	22.9743	0	162280000	5	5	33	NP_001232770.1;NP_001134094.1;AGH92510.1;ACI66840.1;ACI66213.1;ACH70982.1;ACH70981.1;ACI68165.1;ACI68272.1	ribosomal protein L26
20.174	20.8519	19.7516	20.5432	20.7993	20.5402	20.3135	20.5949	20.5025	21.4938	20.1799	21.2438	0	29768000	5	5	26	NP_001133221.1;ACH71048.1;NP_001135178.1;ACH71049.1;ACM09681.1;ACM08747.1;NP_001134618.1;ACI68218.1	26S proteasome non-ATPase regulatory subunit 7 like 1
20.3571	20.2908	20.1747	20.3788	20.5285	20.8195	20.0517	20.0371	20.1538	20.4952	20.3422	19.8597	0	23207000	5	5	15	B5RI54.1;ACH85295.1;ACM09059.1	EIF3H_SALSA RecName: Full=Eukaryotic translation initiation factor 3 subunit H;Short=eIF3h;AltName: Full=Eukaryotic translation initiation factor 3 subunit 3;AltName: Full=eIF-3-gamma;AltName: Full=eIF3 p40 subunit;>gi
22.7451	22.6552	22.7166	22.7956	22.8893	22.7254	22.6205	22.5414	23.108	22.6192	23.0205	22.5359	0	125120000	5	5	48	AGH92567.1;ACN12668.1;ACN12258.1;ACN10308.1;ACN09911.1;ACI69288.1;ACI69238.1;ACI68299.1;ACI67733.1;ACI66230.1;ACI66189.1;ACI66022.1;ACH85307.1;ACI66216.1;ACI68845.1;ACI68638.1;ACI66250.1;ACI68919.1;ACI69820.1;ACI69346.1;ACI67588.1;ACN11122.1;ACI66074.1;ACM08317.1	nascent polypeptide-associated complex subunit alpha
23.5174	23.2747	23.3749	23.9133	23.4782	23.6172	23.5093	23.4376	23.2557	23.8976	24.002	23.564	0	229420000	5	5	47	ACN12399.1;ACN10052.1;ACH85327.1;AGH92637.1;ACN12408.1;ACN10061.1;ACI69075.1;ACI69857.1;ACI70040.1	60S ribosomal protein L11
24.2762	24.359	24.3621	24.758	24.5958	24.6443	24.6074	24.3637	24.0534	24.8103	24.9086	24.4906	0	440400000	5	5	77	ACH85360.1;ACN12347.1;ACN10000.1;ACI68700.1;CAC36993.1;P24558.1;NP_001117136.1;CAA36483.1	ribosomal protein L18
21.3846	20.871	20.3502	20.6679	20.2169	20.4676	21.0576	21.3018	21.5262	19.7662	20.6282	20.712	0	34558000	5	5	20	NP_001133244.1;ACI32891.1	EH domain-containing protein 4
20.1561	20.3673	20.2054	20.2007	20.7165	20.222	20.5492	20.6034	21.2103	21.0527	21.0858	21.4694	0	31414000	5	5	24	NP_001133343.1;ACI33061.1	UDP-glucuronosyltransferase 2A2
21.6606	21.4885	21.0912	21.1566	21.8142	21.8053	21.5967	21.5235	21.8718	21.8917	21.5671	21.3636	0	56134000	5	5	60	ACY30366.1;ACI33864.1;ACI33126.1	pyroxidal kinase
19.4718	19.6082	19.4337	19.6477	19.7776	19.5529	19.8143	19.9321	19.8986	21.1588	20.2657	21.2374	0	20622000	5	5	22	NP_001135197.1;ACI33169.1;ACN10714.1	Dolichyl-diphosphooligosaccharide--protein glycosyltransferase subunit STT3A
20.7213	20.6721	20.4613	20.7352	20.8726	20.6972	20.7723	20.705	20.7846	21.2136	20.7	20.5005	0	31815000	5	5	15	ACI33221.1	Drebrin-like protein
20.9051	20.9879	21.1531	20.7273	21.0219	20.7215	20.6379	20.9474	20.5316	20.9052	20.704	20.9708	0	34251000	5	5	14	ACI69228.1;ACI33240.1	NADH-cytochrome b5 reductase 3
20.8378	20.7701	21.0551	20.9031	20.8431	20.6118	20.8425	21.5541	21.0337	21.7308	20.9687	21.2323	0	40358000	5	5	54	ACI33292.1	Histone H1-beta, late embryonic
NaN	19.9596	20.2252	19.9326	19.9893	19.9984	20.553	19.9901	NaN	19.9099	19.9021	19.9649	0	19453000	5	5	6	NP_001133504.1;ACI33363.1;ACN10491.1	polypyrimidine tract-binding protein 2
20.8539	20.5682	20.6846	20.602	20.8274	20.9367	20.8938	20.9599	20.6315	20.9645	20.9089	20.7312	0	32849000	5	5	22	NP_001133521.1;ACI33401.1;ACM09471.1	dyskerin
21.7303	21.2645	21.0407	20.338	21.5795	22.3552	21.2481	21.3777	22.3909	20.406	20.3486	20.811	0	49377000	5	5	33	ACI33423.1	NDRG1
20.96	21.5249	21.6018	20.4646	20.5356	21.0105	21.1562	20.6952	20.8283	20.6677	20.6353	20.8042	0	37124000	5	5	21	NP_001133534.1;ACI33424.1	lumican precursor
21.7505	21.493	21.8008	21.8263	21.6434	21.8276	21.6942	21.5849	21.1923	22.2226	22.1422	21.6486	0	63905000	5	7	38	NP_001133543.1;ACI33443.1;ACI70159.1;ACI68559.1;ADM15905.1;ACI69292.1	Y-box-binding protein 2-A
21.8524	21.626	21.3219	21.5329	21.8067	21.7621	21.9255	21.7033	22.0627	21.6918	21.6264	21.6281	0	61513000	5	6	45	ACI33476.1	Rho GDP-dissociation inhibitor 1
21.7068	21.4082	21.4112	21.393	21.3195	21.5263	21.5724	21.3677	21.5302	21.6144	21.2987	21.2249	0	51299000	5	5	30	NP_001133567.1;ACI33492.1	Sialic acid synthase
21.2634	20.8676	20.7179	21.0449	20.8154	20.9778	21.2097	20.6899	21.0713	21.492	21.2351	20.8542	0	40123000	5	5	23	NP_001133576.1;ACI33509.1	Coatomer subunit delta
20.7136	20.7787	20.6967	20.7248	20.7702	20.8693	20.7209	20.7454	20.6473	20.7541	20.7476	20.7425	0	31631000	5	5	7	NP_001133677.1;ACI33685.1	Probable aminopeptidase NPEPL1
20.5902	20.9411	20.6911	20.7975	20.5569	20.8132	20.9431	20.9192	20.7457	20.2632	20.7377	20.4613	0	31940000	5	5	26	NP_001135241.1;ACI33767.1;ACI68286.1	26S proteasome non-ATPase regulatory subunit 12
21.7952	21.5	21.7184	21.5076	21.291	21.6424	21.7834	22.0255	21.3267	21.6175	21.8672	21.7126	0	62208000	5	5	27	ACI33919.1;ACM09501.1	3-hydroxyisobutyrate dehydrogenase, mitochondrial precursor
22.8553	22.6533	22.2305	22.8314	22.6233	23.024	22.897	22.7808	22.5779	22.4794	23.0562	23.0832	0	131080000	5	5	62	NP_001135261.1;ACI33991.1;ADM16086.1;ACN10741.1;ACI68321.1;ACI32991.1	GTP-binding protein SAR1a
21.0152	21.2119	19.9753	22.1182	21.7124	21.3992	21.0271	20.901	20.2065	21.8234	22.247	21.5373	0	50667000	5	5	27	NP_001133850.1;ACI34015.1	Farnesyl pyrophosphate synthetase
20.3704	20.4466	20.4589	20.8116	20.072	20.7078	20.6567	20.6228	20.2936	20.6247	21.0372	20.5826	0	29602000	5	5	17	NP_001134011.1;ACI34306.1;ACI33786.1	Aspartyl-tRNA synthetase, cytoplasmic
22.0759	22.138	21.8321	21.7156	22.1249	21.7682	21.9302	21.3102	22.6648	22.2761	21.4154	21.7575	0	70220000	5	5	33	ACN12229.1;ACN09882.1;ACI68511.1;ACI66108.1	Profilin-2
21.009	20.7476	21.4967	21.0731	21.3166	21.1909	21.0697	21.051	21.5627	21.1911	21.2545	20.9937	0	41663000	5	5	27	ACM09840.1;ACM08473.1;ACI68838.1;NP_001134084.1;ACI66180.1	Chromobox protein homolog 3
23.2111	22.894	23.3932	23.3939	22.6999	23.0803	23.3896	23.2545	23.0798	22.8583	23.3911	23.0137	0	169510000	5	5	59	ADM16256.1;ACI70095.1;ACI70058.1;ACI69631.1;ACI68866.1;ACI67711.1;ACI66622.1;ACI66459.1;ADM16011.1;ACI68115.1	Cytochrome c oxidase subunit VIb isoform 1
21.4604	21.0694	20.9123	21.2975	21.0523	21.5605	21.5582	21.0618	21.1612	21.5987	21.2921	21.2869	0	45038000	5	5	41	NP_001134180.1;ACI66494.1	transmembrane emp24 domain-containing protein 2 precursor
21.173	21.0005	21.1397	21.1504	21.4198	21.3225	20.9578	21.3708	21.2819	20.9275	21.1886	21.1821	0	43140000	5	5	25	ACN12528.1;ACN10175.1;ACI70045.1;ACI68954.1;ACI68533.1;ACI66665.1;ACI66047.1	Nuclear transport factor 2
23.739	23.3943	23.681	24.0696	23.3788	23.9041	23.8391	23.7267	23.4995	23.9227	24.1801	23.8951	0	266330000	5	5	47	AGH92608.1;ACI66668.1;ACI67183.1	ribosomal protein L24
20.8902	21.142	21.495	20.7245	21.05	20.7739	20.8175	21.0399	20.6468	21.0365	20.8973	20.9054	0	36994000	5	5	32	NP_001135127.1;ACI66726.1	omega-amidase NIT2
22.026	22.1118	21.9393	22.0692	22.1177	22.1193	22.1415	22.1612	22.0482	22.1766	22.0469	21.9465	0	79464000	5	5	32	NP_001134240.1;ACI66750.1;ACI66101.1	protein SEC13 homolog
21.6598	20.2734	20.3432	20.0908	19.9462	20.1083	21.1296	21.6112	20.2491	20.2587	21.6054	20.2749	0	32875000	5	5	16	ACI66791.1;ACI69282.1	Glyoxalase domain-containing protein 4
23.0402	22.7106	23.1025	23.5746	23.0692	23.1889	23.1013	22.8852	23.0888	23.574	23.4419	23.0068	0	168510000	5	5	53	NP_001134252.1;ACN12730.1;ACN12406.1;ACN12330.1;ACN10369.1;ACN10059.1;ACN09983.1;ACI66801.1	60S ribosomal protein L14
20.6755	20.3767	19.9125	20.1717	20.5776	20.9616	20.9828	21.1598	20.8296	20.7833	20.8566	20.6765	0	30739000	5	5	36	NP_001134323.1;ACI67056.1	Ribokinase
21.8335	21.8582	21.7255	21.6026	21.9121	21.6297	21.594	21.6654	21.7039	21.5308	21.6211	21.645	0	72163000	5	5	54	ACI68786.1;ACI67383.1;ACI67308.1	Proteasome subunit beta type-6 precursor
23.821	23.8894	24.0483	24.0517	23.8876	24.1136	24.0046	24.1788	24.2169	24.0103	24.0868	24.1245	0	312250000	5	8	105	ACI69665.1;ACI67644.1;ACI67551.1;ACN10703.1;ACI33973.1	Heterogeneous nuclear ribonucleoprotein A0
21.7275	21.8045	21.7881	21.7892	21.8381	21.5671	21.6794	21.5922	21.627	21.4972	21.8159	21.6114	0	63077000	5	5	33	ACI68005.1;ACI67557.1;ACI67792.1	Proteasome subunit beta type-7 precursor
21.9946	21.7915	21.5954	21.3743	21.761	21.8127	21.4331	21.101	21.6925	21.8236	21.7759	21.8385	0	59641000	5	5	46	ACI68303.1;ACI67726.1;ACI66835.1;ACI68618.1	Low molecular weight phosphotyrosine protein phosphatase
20.7209	20.803	20.3212	20.5173	20.8545	20.7404	20.6023	20.7204	20.7393	20.387	20.6964	20.502	0	29511000	5	5	38	NP_001134503.1;ACN12748.1;ACN10386.1;ACI67782.1	26S proteasome non-ATPase regulatory subunit 8
21.6333	21.6647	21.4127	21.9795	21.5031	21.9869	21.7819	21.6643	21.9507	21.8555	22.1926	22.0453	0	71242000	5	5	48	ACI67786.1;ACI67965.1	Complement component 1 Q subcomponent-binding protein, mitochondrial precursor
21.9054	21.7049	21.5837	21.6576	21.7884	21.9062	21.7709	21.5711	21.6505	21.7595	22.1884	21.825	0	65034000	5	5	50	NP_001134525.1;ACI67879.1;ACM09018.1	ADP-sugar pyrophosphatase
21.9942	22.2754	22.1918	22.1162	22.1934	22.0353	22.1899	22.3148	21.9015	22.1907	22.1149	22.1548	0	84866000	5	5	50	AGH92639.1;ADM15964.1;ACN12506.1;ACN10154.1;ACI69110.1;ACI67980.1;NP_001116998.1;AAC03020.1	nucleoside diphosphate kinase A
20.9688	21.1487	20.6331	21.0865	21.0783	20.5752	20.5642	20.8233	20.4287	20.5659	20.6285	20.4834	0	33261000	5	5	20	ADM16049.1;ACN12681.1;ACN10321.1;ACI68118.1	MOSC domain-containing protein 1, mitochondrial precursor
23.8258	24.3704	24.1143	23.3384	23.6619	24.0648	23.288	23.7142	23.3598	23.7689	23.5089	23.5293	0	269370000	5	5	53	ACI68448.1	Fatty acid-binding protein, intestinal
20.6401	20.3274	20.7205	20.4294	20.3977	20.4948	20.6234	20.6246	20.5264	NaN	20.5135	20.443	0	26192000	5	5	16	ADM15891.1;ACI68773.1;ACI68563.1	NADH dehydrogenase 1 alpha subcomplex subunit 10, mitochondrial precursor
25.2328	25.2369	25.1862	25.3578	25.1029	25.3809	25.3765	25.4609	25.1181	25.3246	25.3998	25.3518	0	750430000	5	5	92	NP_001134716.1;AGH92528.1;ADM16016.1;ACN12689.1;ACN10329.1;ACI68568.1	Nucleoside diphosphate kinase A
22.3805	22.2115	22.0731	22.5276	22.2745	22.6657	22.5226	22.0155	22.3322	22.6943	22.8184	22.7022	0	103800000	5	5	54	ACN58589.1;NP_001134855.1;ACI69169.1;ACM08855.1	Transmembrane emp24 domain-containing protein 10 precursor
21.0956	21.6208	21.3775	20.7682	20.8372	21.1428	21.312	21.6198	21.163	20.9822	21.1615	21.2941	0	45356000	5	5	25	NP_001134866.1;ACN12717.1;ACN10357.1;ACI69215.1	regucalcin
24.144	24.0344	24.0246	23.5857	23.5839	23.7346	23.8091	23.7983	23.9198	23.6202	23.5752	23.75	0	267570000	5	5	36	ACI69256.1	Annexin A4
22.7982	23.4558	23.5136	23.2105	23.3475	23.0732	22.9747	23.1875	22.6586	22.8519	22.6132	23.2633	0	164610000	5	10	74	ACN12751.1;ACN10388.1;ACI70106.1;ACI69532.1	Flavin reductase
22.0156	21.5872	21.7892	22.1631	21.6374	22.0271	21.7659	21.4647	21.2825	21.6853	22.2675	21.9513	0	67652000	5	5	30	NP_001134952.1;ACI69621.1;ACI68066.1	proto-oncogene tyrosine-protein kinase receptor Ret
20.902	20.7065	20.5225	20.1594	20.7043	20.5784	20.7526	20.9967	20.3252	20.3397	20.6144	20.7223	0	29973000	5	5	16	NP_001135368.1;ACI69627.1	Phosphoribosyl pyrophosphate synthetase-associated protein 1
23.303	23.4471	23.3748	23.5912	23.3465	23.5249	23.521	23.4947	23.3477	23.4691	23.357	23.5879	0	209990000	5	5	75	NP_001135037.2;ACN12426.1;ACN10079.1;ACM08989.1;ACM08399.1;ACI69968.2;ACM09264.1;ACM08491.1;ADM16189.1	FK506-binding protein 1B
21.3601	21.9001	21.5432	21.5174	21.2037	21.4648	21.3698	21.5584	21.1705	21.3681	21.409	21.4892	0	53617000	5	5	29	NP_001135377.1;ACN12651.1;ACN10293.1;ACI70052.1;ACI66387.1	ribulose-phosphate 3-epimerase
20.5668	20.228	20.8256	20.526	20.5537	20.2266	20.1786	20.4092	20.4386	20.712	20.654	20.2968	0	26583000	5	5	11	ACM08987.1	Cytochrome c1, heme protein, mitochondrial precursor
21.9726	22.1948	22.0432	21.885	22.4748	21.7385	21.5019	22.0013	21.715	22.0176	21.7961	21.8045	0	72328000	5	7	49	ACM09612.1;ACM08988.1;ACM09323.1	Acidic leucine-rich nuclear phosphoprotein 32 family member E
20.7196	20.0773	20.7615	20.391	20.6689	20.4562	20.7046	19.7612	20.6718	20.8193	20.3872	20.1158	0	26307000	5	5	15	ACN11225.1;ACM09160.1	Coiled-coil-helix-coiled-coil-helix domain-containing protein 3, mitochondrial precursor
20.493	20.7053	20.8697	20.8398	20.8475	20.3991	20.6341	20.9121	20.9165	21.5114	21.2086	21.4685	0	36089000	5	5	23	ACM09495.1;ACM09163.1;NP_001134386.1;ACI67312.1	Vesicle-trafficking protein SEC22b-B
20.4521	20.6021	20.6527	20.2129	20.4567	20.5436	20.4371	20.3295	20.6984	20.4061	20.419	20.4291	0	26009000	5	5	37	ACN12752.1;ACN12356.1;ACN10389.1;ACN10009.1;ACM09803.1;ACM08565.1;NP_001136190.1;ADM16181.1;ACI70087.1;ACI67236.1;ACI68318.1;ACI66498.1	Actin-related protein 2/3 complex subunit 3
21.7571	21.9181	21.326	21.5307	22.0039	22.042	21.7469	21.6204	21.6816	21.6802	22.159	21.7418	0	65271000	5	5	69	NP_001158739.1;ACN12357.1;ACN10010.1	fucU homolog
21.6948	21.4987	21.621	21.5282	21.641	21.5373	21.7891	21.6339	21.8168	21.4524	21.6348	21.7878	0	58944000	5	5	55	ACN12619.1;ACN10263.1	Superoxide dismutase, mitochondrial precursor
21.0309	20.9582	21.0799	20.0902	20.6427	20.5798	20.6539	20.8822	20.9794	20.5207	20.4894	21.0493	0	31946000	5	5	26	NP_001158759.1;ACN12695.1;ACN10335.1	ketohexokinase
21.5976	22.0438	21.9325	21.6406	21.8593	21.8618	21.8651	21.8562	21.8037	21.6353	22.01	21.7737	0	66402000	5	5	35	NP_001167114.1;ACN10862.1	Splicing factor, arginine/serine-rich 1
20.5286	20.6881	20.926	20.9835	20.8744	20.9152	20.8382	20.7547	20.8001	21.3906	21.2536	20.8422	0	35675000	5	5	40	NP_001167237.1;ACN11166.1	Lupus La protein homolog B
21.457	21.5906	21.4297	21.7836	21.3908	21.7075	21.5237	21.6712	21.5864	21.7616	22.119	21.6333	0	59356000	5	5	31	ACN11269.1;ACN60288.1	Probable ATP-dependent RNA helicase DDX5
21.1148	21.1252	21.4997	21.0402	21.31	21.034	21.1895	21.5179	21.3441	21.3844	20.9859	21.2589	0	45497000	5	5	41	ACN11506.1;NP_001133971.1;ACN10817.1;ACI34238.1;ACM08783.1	High mobility group protein B3
22.0698	21.7051	21.7962	22.0775	22.0102	22.2587	22.3463	22.0494	22.2058	22.0685	22.6789	22.1998	0	84279000	5	5	30	ACN60173.1;NP_001133620.1;ACI33587.1	Nucleophosmin
21.0239	20.8123	20.8605	21.8754	21.2595	21.88	21.6171	21.0157	21.2871	21.7557	22.3361	21.3692	0	52435000	5	5	23	ACN60316.1	Hypoxia up-regulated protein 1 precursor
20.0685	20.5886	20.8167	20.6357	20.4317	20.179	20.5459	21.0273	20.4893	20.7879	20.6176	20.6149	0	27198000	5	5	14	ACN60333.1	Xanthine dehydrogenase/oxidase
23.0585	22.6856	23.6478	22.7919	22.9675	22.4569	22.6799	22.829	23.5586	22.701	21.5676	22.4915	0	134720000	5	5	33	P21848.1;NP_001117137.1;CAA36643.1	ALBU1_SALSA RecName: Full=Serum albumin 1;Flags: Precursor;>gi
22.6664	22.5252	22.4952	22.944	22.3491	22.8713	22.7083	23.2755	22.4642	23.2478	23.3684	23.0813	0	142590000	4	4	58	ACH85329.1;Q37677.3;NP_008448.1;AHG24901.1;AFC17534.1;AFC17521.1;ADN83675.1;AAF61381.1;AAD04736.1;AAB08524.1	cytochrome c oxidase subunit 2
26.3527	26.2302	26.1627	26.4989	26.2833	26.3569	26.437	26.2912	26.5286	26.2005	26.4809	26.1788	0	1525400000	4	28	481	NP_001117004.1;AGT57169.1;AAD30275.1;ACH70738.1;AGT57166.1;AGT57168.1;CAJ90902.1;AGT57167.1;ADM16069.1;ACI70148.1;ACI68177.1	heat shock protein hsp90 beta
25.628	26.2447	26.0591	25.7326	25.8515	25.5408	25.8239	25.7698	25.5927	25.4693	26.3068	25.6873	0	1075900000	4	4	59	NP_001133115.1;NP_001117011.1;ACH70896.1;ACH70895.1;ACH70894.1;ACH70714.1;AAG25672.1	fast myotomal muscle actin 2
21.1132	20.4677	21.1833	20.0475	21.2399	21.0354	20.8662	21.3146	20.387	20.5445	20.9393	20.8849	0	34973000	4	4	22	NP_001117053.1;AAT77222.1	C type lectin receptor C
20.8861	21.1136	21.428	20.9272	22.3486	21.2496	21.098	21.8561	20.8566	21.4889	21.4934	21.5489	0	49754000	4	4	20	AAV97941.1;AAV97940.1;AAV97937.1	Na,K-ATPase alpha subunit isoform 1c/ii
21.7775	21.9328	22.3363	21.7619	22.4586	21.3951	21.7737	22.3663	22.1808	21.6156	21.1846	21.9813	0	70007000	4	4	36	NP_001117081.1;ACI69657.1;ACI68766.1;ACI67252.1;ACH70664.1;ABG54277.1;NP_001135019.1;ACI69897.1	macrophage migration inhibitory factor
23.3699	23.3171	22.6818	23.4727	22.9189	23.3657	23.4136	23.3577	23.2195	23.216	23.2319	23.1521	0	181470000	4	6	79	NP_001133265.1;ACI32926.1;ABQ59661.1;ABO13873.1	Tubulin beta chain
21.3922	21.546	20.833	21.2526	21.4176	21.64	21.4914	21.4196	21.5739	21.101	21.5241	21.4612	0	50584000	4	4	34	NP_001133110.1;ACH70706.1	rab GDP dissociation inhibitor beta
21.1678	20.7712	20.8517	20.5077	21.2737	21.1066	21.4739	21.419	20.9738	20.3496	20.1857	20.6719	0	36155000	4	4	21	ADM16096.1;ADM16043.1;ACM08326.1;ACI69119.1;ACI67538.1;ACI33402.1;ACH70732.1;ACM08679.1	Brain protein 44
26.6661	26.6581	26.4771	26.6256	26.3208	26.5252	26.6828	26.7282	26.5255	26.5132	26.4929	26.774	0	1845600000	4	4	119	NP_001135161.1;AGH92527.1;ACN12633.1;ACH70768.1	2-peptidylprolyl isomerase A
23.6975	23.5955	23.7904	24.0876	23.8243	24.0321	23.8831	23.533	23.4135	23.9096	24.2005	23.8453	0	269810000	4	4	48	ACN12793.1;ACN12424.1;ACN12228.1;ACN10849.1;ACN10427.1;ACN10077.1;ACN09881.1;ACI69805.1;ACI69435.1;ACI67494.1;ACH70771.1;ACI69037.1;ACI69854.1	60S ribosomal protein L32
21.127	20.9324	20.1518	20.9358	20.9132	21.1863	20.9653	20.6823	20.899	20.4195	21.1998	20.9726	0	35285000	4	4	32	NP_001135167.1;B5DGH9.1;ACH70853.1	eukaryotic translation initiation factor 3 subunit E
23.6351	23.681	23.9105	24.0302	23.8397	24.0368	23.8747	23.7281	23.4973	24.2095	24.215	23.6863	0	279260000	4	4	55	NP_001133165.1;ACH70855.1;ACN12501.1;ACN10150.1;NP_001158770.1;ACN12745.1;ACN10383.1	60S ribosomal protein L28
22.6628	22.2575	22.2945	23.1159	22.2391	22.8702	23.0262	22.6194	22.6799	23.1717	22.9298	22.7298	0	128630000	4	4	50	ACI68370.1;ACH70859.1;ACM08535.1;ACN12217.1;ACN09870.1;NP_001134862.1;ACI69192.1	60S ribosomal protein L12
22.1272	22.061	21.715	21.787	21.871	22.0762	21.8624	21.9949	22.1845	21.4758	21.7663	21.9723	0	72191000	4	4	43	ADM16027.1;ACI69598.1;ACI68800.1;ACI67569.1;ACH70865.1	Proteasome subunit beta type-3
22.6198	22.6484	22.9017	22.3751	23.0372	22.511	22.759	22.6626	23.0416	22.7975	22.5377	22.687	0	123750000	4	4	45	ACH70922.1;ACI69486.1;ACI33459.1	elongation factor-1 delta-1
21.5877	21.6704	21.4014	21.8639	21.9132	21.6657	21.639	21.658	21.4113	21.3549	22.1808	21.6579	0	61925000	4	4	34	ACH70959.1;NP_001133566.1;ACI33491.1;ACM09555.1;ACM08320.1;ACH70960.1;ACN12625.1;ACN10269.1;ACM08332.1	nucleosome assembly protein 1, like 1
22.8673	22.9531	22.8241	22.9796	22.7575	22.8978	22.9319	23.0762	22.8813	22.6947	22.8371	22.8546	0	141420000	4	8	45	ACI70006.1;ACI66033.1;ACH70967.1;ACI69778.1;ACI69799.1;ACI67796.1;ACI66670.1;ACM09335.1;ACI70015.1	Proteasome subunit alpha type-6
21.8009	21.5949	22.0576	21.9552	22.1569	21.9763	21.9895	21.5703	21.8434	22.3791	22.0508	21.6817	0	71011000	4	4	49	NP_001135081.1;ADM16067.1;ADM15895.1;ACN12431.1;ACN12421.1;ACN10084.1;ACN10074.1;ACM09740.1;ACI70130.1;ACI68435.1;ACI68026.1;ACI66480.1;ACH70987.1;ACH70986.1	60S ribosomal protein L37a
23.1262	23.0939	23.1262	23.2406	23.1836	23.3753	23.3404	23.0948	23.0877	23.3316	23.6966	23.3633	0	183240000	4	4	61	NP_001133207.1;ACN12206.1;ACN09859.1;ACH70993.1;ACM09788.1;ACM09200.1;ACM09422.1;ACM08361.1;ACM09537.1;ACM08252.1;ADM16145.1;ACM09317.1;ACM08936.1;ACI69468.2;ACH70994.1;ACM08451.1	ribosomal protein, large P2, like 1-2
23.3872	23.2362	23.0135	23.7488	22.9639	23.6298	23.5603	23.3005	23.2816	23.5961	23.6905	23.4918	0	207410000	4	4	50	NP_001134159.1;ACI70097.1;ACI66432.1;ACH70997.1;ACN12297.1;ACN09950.1	40S ribosomal protein S15a
23.1344	22.5536	22.7994	23.1057	22.9685	23.2402	23.096	22.8075	22.8357	23.2174	23.3407	22.7974	0	151190000	4	4	53	ACH85355.1;ACH85339.1;ACN12742.1;ACN12540.1;ACN10380.1;ACN10186.1;ACI67868.1;ACN12293.1;ACN09946.1;ACN12295.1;ACN09948.1	ribosomal protein L13a
22.918	22.771	23.1308	23.3098	22.6104	22.8584	23.3217	23.2646	22.7298	23.0335	22.6687	23.1141	0	154440000	4	8	55	ACH85351.1;ACI66030.1;ACI67343.1	ATP synthase H+ transporting mitochondrial F1 complex O subunit
22.9075	22.7905	22.5679	22.9182	22.5215	22.75	22.8411	22.7433	22.8123	22.6831	22.9464	22.9836	0	132450000	4	4	45	NP_001133266.1;ACI32927.1	Phosphoglycerate kinase
20.1065	19.9927	20.1146	20.7158	20.1038	20.3245	20.564	20.4304	20.2318	20.0539	20.376	20.3701	0	23693000	4	4	16	NP_001133273.1;ADM16168.1;ADM16123.1;ACI70142.1;ACI68969.1;ACI68205.1;ACI32945.1	Eukaryotic translation initiation factor 3 subunit I
26.3716	26.2453	26.515	26.4945	26.0979	26.3624	26.5216	26.4641	26.278	26.394	26.368	26.4852	0	1606500000	4	19	252	ACN10935.1;ACI33076.1	ATP synthase subunit alpha, mitochondrial precursor
21.5256	21.5924	21.4548	21.4139	21.377	21.5616	21.5656	21.5208	21.4928	21.7274	21.58	21.5772	0	54930000	4	7	26	ACI33086.1;ACN11301.1	Heterogeneous nuclear ribonucleoprotein K
20.5722	20.7141	20.4859	20.0906	20.2032	20.1648	20.8726	20.6235	20.3099	20.1187	19.8731	20.2123	0	24302000	4	4	13	NP_001133433.1;ACN11392.1;ACI33224.1	aminoacylase-1
20.2182	20.6485	20.5401	20.3458	20.1191	20.1416	20.1433	20.2189	20.3952	20.0663	20.2931	20.2973	0	23605000	4	4	27	NP_001133447.1;ACI33253.1	aspartyl aminopeptidase
19.7937	19.6984	19.9594	20.0059	19.8303	19.8817	19.8101	19.775	20.0463	20.7525	20.8121	19.8699	0	19564000	4	4	15	NP_001133496.1;ACI33349.1	Nucleolar protein 5
19.4184	19.6904	19.9441	19.5681	20.0696	NaN	19.7722	20.4435	19.6414	20.3863	19.5833	20.3199	0	16945000	4	4	11	NP_001133508.1;ACI33373.1	Flotillin-2a
20.5971	21.28	21.3347	20.9781	20.7838	21.1328	20.9597	20.8875	20.9978	21.2621	21.1327	21.1356	0	38659000	4	4	23	NP_001133518.1;ACI33396.1;ACM09429.1;ACN10524.1	Ran-specific GTPase-activating protein
20.7363	20.5184	20.2673	20.3328	20.2939	20.4295	20.5855	20.7586	21.1558	20.5314	20.1229	20.7604	0	28031000	4	4	18	NP_001133654.1;ACI33646.1	Lysosomal protective protein precursor
20.7455	20.6871	21.5743	20.8549	20.9184	20.8144	20.576	20.9493	20.8509	21.4817	20.9736	20.525	0	36052000	4	4	16	NP_001133655.1;ACI33647.1	Eukaryotic translation initiation factor 2 subunit 1
20.4931	20.6871	19.3915	20.0004	20.3316	20.423	20.3922	20.5296	20.0851	19.8978	20.4143	20.6202	0	24189000	4	4	31	NP_001133658.1;ACI33652.1	sugar kinase FLJ10986 homolog
20.7668	20.8397	20.7499	20.4428	20.8691	20.9628	20.8294	20.6074	21.034	20.7336	20.903	20.7288	0	32545000	4	6	21	ACI33676.1	TAR DNA-binding protein 43
19.6898	19.6471	20.2379	20.1046	20.3826	19.864	20.3927	20.1383	20.4344	21.9062	21.5589	21.3581	0	29841000	4	4	13	NP_001133688.1;ACI33703.1;NP_001167418.1;ACN11112.1;ACH85336.1	transport protein Sec61 subunit alpha
21.9545	21.911	21.7633	21.668	21.924	21.9143	21.7591	21.8113	21.917	21.6664	21.9302	21.7745	0	68777000	4	4	46	ACI66599.1;ACI33758.1	Clathrin light chain A
21.6305	21.9605	22.1352	21	22.0434	20.866	21.4521	21.7619	22.7102	21.8247	20.9204	22.1898	0	63837000	4	4	32	ACN12507.1;ACN10155.1;ACM09309.1;ACM09141.1;ACM08537.1;ACI33774.1;ACM08944.1	Ependymin precursor
22.0848	22.1896	22.3175	21.852	22.0925	22.1103	22.1084	22.4015	22.2531	22.0999	22.2157	22.0081	0	102680000	4	5	35	ACI33813.1	Splicing factor, arginine/serine-rich 5
21.2745	21.2692	21.1384	21.1716	21.354	21.3216	21.417	21.254	21.3667	21.783	21.8944	21.4918	0	50287000	4	4	15	NP_001133740.1;ADM16088.1;ACI68476.1;ACI33816.1	transmembrane emp24 domain-containing protein 9 precursor
NaN	20.1551	19.977	NaN	20.9902	20.6339	NaN	19.9526	21.2492	20.7523	NaN	20.3502	0	21774000	4	4	17	NP_001133760.1;ACN10493.1;ACI33851.1	Polypyrimidine tract-binding protein 1
20.567	20.6718	20.6441	20.6787	20.7929	20.5757	20.6237	20.6767	20.909	20.6902	20.8247	20.9577	0	31237000	4	4	16	NP_001133884.1;ACI34076.1;ACM08790.1;ACI68958.1;NP_001134031.1;ACI34343.1	Ras-related protein Rab-11B
20.6917	20.63	20.6665	20.4783	20.4896	20.2543	20.4486	20.6128	20.4159	20.404	20.3584	20.3371	0	26405000	4	4	20	NP_001133896.1;ACI34100.1	peptidyl-prolyl cis-trans isomerase FKBP4
20.2534	20.2699	20.0155	20.0245	20.0321	20.0824	20.7463	20.1808	21.6297	20.3888	20.4603	21.136	0	26395000	4	4	17	ACI34170.1;ACH85279.1	Digestive cysteine proteinase 2 precursor
22.4606	23.0305	20.1567	19.6044	22.0427	20.78	19.8837	22.4386	21.6123	19.4786	19.0102	20.5235	0	56137000	4	4	15	NP_001133969.1;ACI34235.1	L-lactate dehydrogenase B chain
21.128	20.1977	20.7411	20.4286	21.2746	20.7797	20.8336	20.9375	20.6939	20.4153	20.2937	19.9969	0	30147000	4	4	18	NP_001135284.1;ACI34239.1	UV excision repair protein RAD23 homolog A
22.0431	21.8246	22.112	21.8666	21.654	21.8964	22.148	22.0749	22.0413	22.092	21.8035	21.876	0	73677000	4	9	55	ACI34296.1	Pyruvate dehydrogenase E1 component subunit alpha, somatic form, mitochondrial precursor
20.6032	20.7062	20.633	20.6209	20.5261	20.2986	20.3321	20.8663	21.308	20.6716	20.4654	20.4634	0	30464000	4	4	15	ACN12722.1;ACN10361.1;ACI69959.1;ACI66058.1;ACI69938.1	Proteasome subunit alpha type-3
22.0696	22.7862	22.7081	22.739	22.0076	22.754	22.5826	22.8039	22.0021	22.6088	22.7229	22.4755	0	115360000	4	4	37	ACI69489.1;ACI66789.1;ACI66656.1;ACI66096.1	Copper transport protein ATOX1
21.2257	20.8651	20.757	21.1517	21.0977	21.1058	21.2195	20.8714	21.1072	20.6618	21.2674	20.8805	0	38325000	4	4	26	ACI69664.1;ACI66950.1;ACM08342.1;ACI69629.1;ACI67742.1;ACI66422.1;ACI66240.1;ACI69853.1;ACI69427.1;ACI69163.1	Eukaryotic translation initiation factor 3 subunit K
23.4549	23.3167	23.539	23.8516	23.5074	23.5897	23.69	23.2996	23.4232	23.7763	23.7669	23.6358	0	223840000	4	4	47	ACI69923.1;ACI66260.1;ACN12287.1;ACN09940.1;ACI70061.1;ACI67271.1;ACN12714.1;ACN10354.1	40S ribosomal protein S21
23.9569	23.8236	24.1125	24.3056	24.0683	24.1914	24.0792	23.8529	23.7058	24.5492	24.2647	23.8249	0	322740000	4	4	43	ACI67721.1;ACI66472.1;ACI66280.1;AGH92593.1;ADM16278.1;ACN12663.1;ACN12339.1;ACN12312.1;ACN10303.1;ACN09992.1;ACN09965.1;ACI70076.1;ACN12288.1;ACN09941.1;ACN12311.1;ACN09964.1;ACN12325.1;ACN09978.1	60S ribosomal protein L31
21.7716	22.0759	21.1254	21.5062	21.9125	21.7913	21.5152	21.3939	21.8388	21.3427	21.4612	21.5294	0	58529000	4	7	51	NP_001135126.1;ACI69071.1;ACI68963.1;ACI66411.1	proteasome activator complex subunit 2
21.6295	21.899	22.4389	22.0672	22.1645	22.0382	22.2847	22.0538	22.098	21.3756	21.4946	21.7608	0	73675000	4	4	35	ACI66502.1	Cytochrome b5
22.4404	22.5398	22.3493	21.7978	21.7325	22.1594	22.6534	22.822	22.2805	21.8795	21.7223	22.1854	0	92439000	4	4	43	NP_001134227.1;ACI66699.1	glutathione S-transferase alpha 3
20.8666	20.7073	21.2001	21.1313	20.9566	20.9584	20.9464	20.9393	20.8236	21.3622	21.0544	20.7287	0	37523000	4	4	26	ACI66942.1;ACN12550.1;ACN10196.1;ACI69638.1;ACI68002.1	Cytochrome b-c1 complex subunit Rieske, mitochondrial precursor
22.8095	23.232	23.013	23.2616	22.9001	22.9032	22.6904	23.0884	22.862	22.8714	22.8449	22.855	0	147840000	4	4	16	ACI68294.1;ACI67008.1	Peroxiredoxin-6
20.6854	21.4438	20.3183	20.8446	21.0838	20.7189	21.0014	21.5009	20.9249	20.9555	20.7438	21.4477	0	39361000	4	5	45	ADM16254.1;ACI67026.1;ADM16245.1;ACI66581.1	Calpain small subunit 1
20.7211	20.6557	20.4293	20.25	20.35	20.4787	20.4895	20.4599	20.305	20.6756	20.78	21.0026	0	28072000	4	4	29	ADM15955.1;ACI67038.1	Thymidylate kinase
20.682	20.1947	20.3085	20.5163	20.6252	20.7454	20.8143	20.4339	20.8634	20.4925	20.7192	20.2917	0	27608000	4	4	15	NP_001134601.1;ACI68164.1;ACI67058.1;ACI66468.1	Eukaryotic translation initiation factor 6
22.1559	21.7251	21.8183	22.0803	21.7122	22.128	22.3999	21.7779	21.9373	22.3076	22.4076	22.03	0	78915000	4	9	63	ACI67266.1	Apolipoprotein A-IV precursor
20.9826	21.0469	21.2733	NaN	21.1825	NaN	NaN	20.9576	NaN	NaN	NaN	NaN	0	40910000	4	4	5	ACI67390.1;ACM08411.1;ACI34053.1;ABW77497.1	Pyridoxine-5-phosphate oxidase
21.8734	21.9508	21.3813	21.8727	22.0079	21.9226	21.72	21.6641	22.1099	21.5716	21.8848	21.8586	0	66415000	4	4	48	ACI67450.1;ACI69686.1;ACI66930.1;ACI66076.1;ADM16064.1;ACI67336.1	Proteasome subunit beta type-4 precursor
20.1911	20.4905	20.3972	20.6586	21.008	20.4943	20.1908	20.4093	20.9333	20.6231	20.5922	20.6533	0	27639000	4	4	27	NP_001134437.1;ADM16030.1;ACM09794.1;ACM09779.1;ACM09564.1;ACM09274.1;ACI67506.1;ACM09656.1	S-phase kinase-associated protein 1
20.9193	20.9466	21.4571	20.6243	20.6641	20.9316	20.9125	20.331	20.6043	21.3867	21.0011	20.7955	0	35390000	4	4	19	NP_001134971.1;ACI69684.1;ACI69244.1;ACI67984.1;ACI67762.1;ACI67575.1;ACI66683.1;ACI66088.1	Thioredoxin domain-containing protein 17
22.847	22.8968	22.9421	22.7171	23.1179	23.1335	22.8971	22.6995	22.8607	23.3518	23.192	22.8799	0	147600000	4	7	61	ACI67639.1	NHP2-like protein 1
NaN	20.3482	22.1309	21.0047	21.1595	21.1069	21.1633	21.2129	21.1569	20.9591	NaN	21.092	0	41468000	4	4	15	ACI67765.1;ADM16264.1;ACI66608.1;ADM15946.1;ACI66095.1;CAJ90906.1;ACI67529.1;ACI67640.1;ACI66495.1	S100-A1
21.1234	21.7312	21.3553	21.5383	21.6734	21.4445	21.1097	21.4324	21.4588	21.5186	21.669	21.35	0	51996000	4	4	39	NP_001135360.1;ADM16265.1;ACI69220.1;ACI67841.1	26S proteasome non-ATPase regulatory subunit 14
23.0149	23.5176	22.7643	23.9105	22.7916	23.346	23.5981	23.9908	23.4139	23.7934	22.7144	23.7939	0	214280000	4	4	62	NP_001134628.1;ACI68263.1	histidine triad nucleotide-binding protein 1
21.1944	22.2588	19.9323	18.9198	18.8457	18.0592	19.5378	22.8685	22.519	19.2424	NaN	22.0945	0	46664000	4	4	17	ADM16035.1;ACI69006.1;ACI68380.1;ACI68905.1;ACM09568.1	Glutathione S-transferase P
20.0709	20.1883	NaN	19.9431	NaN	NaN	19.8546	NaN	20.054	19.9801	19.9977	NaN	0	18282000	4	4	8	NP_001134720.1;ACI68591.1;ACI69824.1	26S protease regulatory subunit 8
19.7492	20.3439	19.4771	19.8223	20.0375	19.7848	19.825	19.8273	19.6481	19.9648	19.8934	19.9234	0	17362000	4	4	25	NP_001134743.1;ACI68668.1	Annexin A1
20.7782	21.2523	21.4097	21.3502	20.9564	21.1613	21.3185	21.3952	20.6433	21.3242	21.2512	21.5885	0	45709000	4	4	20	NP_001134746.1;ACI68681.1	peptidyl-prolyl cis-trans isomerase FKBP3
20.2527	20.35	19.9144	20.1722	20.139	20.4465	20.2189	20.1038	20.0725	20.1362	20.3328	20.1375	0	21671000	4	4	4	ACI70003.1;ACI67305.1	Carbonyl reductase 1
23.1744	23.1254	22.199	23.308	23.1582	23.2499	23.2151	23.0626	22.7115	23.0063	23.2027	23.1001	0	161560000	4	4	51	NP_001135055.1;ACI70034.1	Death-associated protein 1
21.4096	21.131	21.3558	21.513	20.9059	21.762	21.4683	21.4693	21.4834	21.4781	21.7216	21.36	0	51591000	4	4	37	NP_001135086.1;ACI70145.1;ACI70101.1	3-hydroxyacyl-CoA dehydrogenase type-2
25.0714	24.663	24.7705	24.9298	25.642	25.3073	24.9767	24.4717	25.1633	24.7114	25.452	24.9055	0	601740000	4	4	219	ACM08990.1;ACI70202.2;ADM15872.1;ACI68319.1;NP_001133190.1;ACH70924.1;ACM08434.1;ACH85335.1;NP_001117016.1;AAO32675.1;ACM09312.1;NP_001133148.1;ACM09188.1;ACM08645.1;ACH70799.1	Cold-inducible RNA-binding protein
24.1254	24.0803	23.647	23.9792	24.1726	24.2473	24.2153	23.7265	23.9117	23.6308	23.857	23.9824	0	301560000	4	4	19	ACM08419.1;ACM08634.1	60S acidic ribosomal protein P2
19.7623	19.9343	20.0382	19.9648	20.5584	20.1287	19.7795	20.1163	20.2896	19.9942	20.2319	20.0177	0	19420000	4	4	19	ACM08598.1;ACN11163.1	Acidic leucine-rich nuclear phosphoprotein 32 family member E
22.1305	21.7428	21.6041	22.3061	22.096	22.1234	22.2204	21.8711	22.0163	22.2649	22.1352	21.9367	0	76901000	4	5	41	ACN12475.1;ACN12253.1;ACN10124.1;ACN09906.1;ACM09494.1;ACM08705.1;ACM08644.1	Elongation factor 1-delta
21.3891	22.1319	21.363	21.4975	20.9571	21.4856	21.3222	21.2728	21.4644	21.1205	21.4511	21.4734	0	52525000	4	6	33	ACM09025.1;NP_001134980.1;ACI69718.1;ACN12512.1;ACN10159.1;ACI67196.1;ACI66772.1	Transgelin
22.9303	22.868	23.0874	22.9807	22.9357	23.0039	23.0532	22.9489	22.8373	22.9799	23.0582	22.8827	0	147290000	4	7	56	ACM09161.1;ACI68857.1;ADM15873.1;ACI69717.1	Cytochrome c oxidase subunit 5A, mitochondrial precursor
21.104	21.3076	20.7917	20.6903	20.5463	20.9365	20.9034	20.9913	20.8745	20.821	20.6885	20.9982	0	35324000	4	4	20	NP_001140019.1;ACM09257.1	sorting nexin 12
21.5001	22.0749	22.0959	22.0188	21.7954	21.8511	21.7421	21.8838	21.7757	21.6398	21.7042	21.8616	0	69330000	4	4	37	ACM09285.1	thiosulfate sulfurtransferase KAT
22.327	22.6285	22.2146	22.5869	22.1043	22.4492	22.5742	22.7608	22.3968	22.9347	22.3571	22.8019	0	111830000	4	4	49	NP_001140078.1;ACM09531.1	2-peptidylprolyl isomerase A
22.7103	22.6388	22.5497	22.4548	22.5324	22.5936	22.6325	22.6753	22.5375	22.5763	22.4916	22.6517	0	114310000	4	10	79	AHG98246.1;ACM09558.1;ACM09013.1	proteasome activator complex subunit 1, partial
23.4457	23.3024	23.7244	24.0603	23.2816	23.7984	23.9631	23.6859	23.499	24.2192	23.9692	23.7437	0	259490000	4	4	39	ACN12393.1;ACN10046.1;NP_001134137.1;ACI66338.1	60S ribosomal protein L23
23.0476	22.9286	23.3037	23.3008	23.2043	23.0054	23.4311	23.1895	23.3251	22.9593	23.1158	23.1245	0	169980000	4	4	50	ACN12690.1;ACN10330.1	Glycine cleavage system H protein, mitochondrial precursor
20.4092	20.4696	20.1824	20.2801	20.3393	20.2335	20.3232	20.1865	20.3632	20.6894	20.2928	20.2908	0	23870000	4	4	42	NP_001158761.1;ACN12706.1;ACN10346.1	SAPK substrate protein 1
19.342	19.875	19.7944	19.583	19.6993	19.5419	19.6488	20.2656	20.164	21.1886	19.9868	20.362	0	19028000	4	4	9	ACN10454.1	NADPH--cytochrome P450 reductase
21.711	21.0011	20.8287	21.5033	20.5178	20.6348	21.6476	21.8134	20.7586	21.201	21.297	20.5987	0	44898000	4	4	21	NP_001158858.1;ACN10623.1	myotrophin
23.7428	23.3938	24.258	23.4086	23.805	23.3907	22.849	22.774	23.921	23.6584	23.3423	22.9506	0	207930000	4	9	35	ACN10639.1;ACI68914.1	Tropomyosin alpha-3 chain
20.0004	20.0514	NaN	20.2561	20.0931	NaN	NaN	19.8573	19.9074	20.0576	20.4534	20.1248	0	16572000	4	4	11	NP_001140086.2;ACN10702.1;ACM09606.1	nuclear migration protein nudC
20.3624	20.2604	19.4075	19.8345	20.1957	20.0451	19.8911	19.8678	20.3472	19.8974	20.1178	20.0841	0	19383000	4	4	17	ACN10840.1;ACI33042.1;ACN58654.1	Vacuolar ATP synthase catalytic subunit A
19.4993	19.1549	19.0451	19.1854	19.3689	19.4097	18.9839	19.033	19.4208	19.0303	19.1652	19.4641	0	11366000	4	4	12	NP_001167140.1;ACN10921.1	major vault protein
21.1706	21.1205	21.3141	20.9771	21.3593	21.3237	21.2058	21.3629	21.4243	21.3662	21.3686	20.9431	0	45149000	4	4	38	NP_001167168.1;ACN10974.1	Heterogeneous nuclear ribonucleoprotein H
20.5613	19.7802	19.7565	20.029	19.9321	20.1783	20.0074	19.9599	19.7266	20.2302	19.8249	20.0918	0	19277000	4	4	20	NP_001167411.1;ACN11021.1	Eukaryotic translation initiation factor 3 subunit E-interacting protein
23.3801	23.2022	23.5965	23.6678	23.4064	23.4785	23.3112	23.3573	23.4212	23.5253	23.8442	23.173	0	206830000	4	15	128	ACN11027.1;ACI69988.1	Stress-70 protein, mitochondrial precursor
24.5785	24.3847	24.2225	24.6534	24.3698	24.7675	24.7654	24.4427	24.3539	24.9657	24.9955	24.9804	0	475010000	4	20	224	ACN11098.1	Dolichyl-diphosphooligosaccharide--protein glycosyltransferase subunit 1 precursor
20.0223	20.6122	20.0015	20.0451	20.4564	20.2088	20.0638	20.0967	20.1816	20.2778	20.1336	20.305	0	21047000	4	4	13	NP_001167288.1;ACN11286.1	Signal transducer and activator of transcription 5B
21.9378	22.1776	22.1114	22.1545	22.3723	22.0451	22.4291	22.502	22.7047	22.2599	22.3028	22.4863	0	90975000	4	4	50	NP_001167318.1;ACN11348.1	peroxisomal acyl-coenzyme A oxidase 1
21.1236	NaN	NaN	21.5869	21.0532	NaN	21.3361	21.4368	21.0697	21.1594	NaN	NaN	0	46522000	4	4	7	ACN58644.1	Cytochrome b-c1 complex subunit 1, mitochondrial precursor
NaN	24.6382	24.8409	NaN	24.5384	24.4085	24.6743	25.2126	NaN	NaN	24.223	24.0699	0	452640000	4	4	9	ACN58648.1	Syntaxin-binding protein 3
20.2084	20.053	NaN	NaN	NaN	19.9356	19.8789	19.9741	NaN	NaN	NaN	19.6453	0	18094000	4	4	7	ACN58731.1	Calcium/calmodulin-dependent protein kinase type II delta chain
24.9692	25.1632	24.9579	24.6382	24.6934	24.665	25.101	25.2369	25.0705	24.3997	24.1275	24.8727	0	554970000	4	4	82	ACN60281.1;NP_001133176.1;ACH70893.1	Fructose-1,6-bisphosphatase 1
19.7622	20.2226	20.5257	20.6028	20.3652	20.6742	20.5624	20.4294	20.1173	20.8905	20.7309	20.6157	0	27696000	4	4	28	ACN60318.1	Eukaryotic translation initiation factor 4B
22.2311	22.5669	22.5792	22.4254	22.8695	22.2536	22.7958	23.0022	23.083	22.5659	22.6571	22.8205	0	121250000	4	4	49	ACY82517.1;ABC95194.1	acyl-coenzyme A oxidase 1
18.9577	19.1761	21.6197	19.1741	20.121	19.1986	19.6522	18.757	20.6991	19.8691	19.4704	18.8802	0	16580000	3	3	13	P49946.1;NP_001117129.1;ACN12764.1;ACI67950.1;ACI33630.1;ACH70935.1;ACH70934.1;AAB34575.1;NP_001133194.1;ACN12571.1;ACN12264.1;ACN10744.1;ACN10216.1;ACN09917.1;ACI68239.1;ACH70933.1	FRIH_SALSA RecName: Full=Ferritin, heavy subunit;Short=Ferritin H;>gi
20.7254	21.2259	20.666	20.6433	20.5098	20.1719	21.5195	21.1177	20.7607	20.6432	20.1699	20.7584	0	37246000	3	3	23	NP_001117052.1;AAT77221.1;ACI66816.1;ACI66229.1	C type lectin receptor B
21.1164	21.3991	21.5561	21.0307	20.8513	21.8516	22.0095	21.8097	22.0054	21.0891	21.71	21.7614	0	56818000	3	7	39	NP_001133102.1;ACI69735.1;ACH70694.1;ACI69278.1	aspartoacylase 3
23.1155	22.823	22.704	23.2	23.3782	23.1945	23.2422	22.8894	23.0847	22.9619	23.3072	23.15	0	160730000	3	3	49	ACH85359.1;ACN12781.1;ACN12257.1;ACN12256.1;ACN10416.1;ACN09910.1;ACN09909.1;ACH70769.1;ADM15935.1;ACI67650.1;ACI66598.1;ACI66109.1;ACN10478.1;ACI70042.1;ACI66897.1	40S ribosomal protein S24
25.9304	25.5755	25.8327	25.4789	25.9294	25.7099	25.3609	25.6249	25.8247	26.1235	25.7266	25.7313	0	1013800000	3	4	58	ADM16155.1;ADM16115.1;ACN12505.1;ACN12374.1;ACN10153.1;ACN10027.1;ACM09557.1;ACI69641.1;ACI68191.1;ACI67816.1;ACI66843.1;ACI66770.1;ACI66137.1;ACI66110.1;ACI34256.1;ACH70792.1;ACM09081.1;ACM09697.1;ACI69015.1;ACI69610.1;ACI69005.1;ACI69794.1	Histone H2AV
NaN	NaN	NaN	NaN	NaN	NaN	NaN	NaN	19.6235	NaN	19.675	19.754	0	14577000	3	3	3	ACH70819.1;NP_001117191.1;DAA05186.1;DAA05185.1	reticulon 4 isoform 2
19.5866	19.4298	19.5027	19.7486	19.5015	19.4194	19.7272	19.7069	19.7706	19.8491	19.6355	19.5955	0	14691000	3	3	13	NP_001135166.1;ADM16144.1;ACN12497.1;ACN10146.1;ACI67402.1;ACI66514.1;ACH70850.1	succinate dehydrogenase [ubiquinone] iron-sulfur subunit, mitochondrial
20.4404	20.4705	20.6386	20.5826	20.9132	20.6577	20.6059	20.2823	20.5538	21.0594	20.8338	20.1162	0	27480000	3	3	31	ACI68884.1;ACH70877.1	Cytochrome c oxidase subunit 5B, mitochondrial precursor
22.0454	21.8636	22.21	22.4422	21.9593	22.3764	22.3348	22.1344	21.8838	22.5685	22.7553	22.2919	0	91726000	3	3	36	NP_001134315.1;ACN12392.1;ACN12233.1;ACN10045.1;ACN09886.1;ACI67034.1;ACH70883.1	40S ribosomal protein S20
23.1402	23.3872	23.1152	23.0728	22.8348	22.9828	22.9597	23.2186	22.905	22.869	23.1532	23.0533	0	161550000	3	7	77	ADM15886.1;ACI68070.1;ACH70954.1;ACI67885.1;ACI66712.1;ACI66702.1;ACH70953.1;ACI69179.1;ACI66544.1	Myosin regulatory light chain 2, smooth muscle isoform
19.3273	19.195	20.1452	19.4717	19.1458	19.2578	19.2545	19.2702	19.5004	20.1492	19.8531	19.1798	0	13343000	3	3	13	NP_001133516.1;ACN10780.1;ACI33390.1;ACH70973.1;NP_001133204.1;ACH70974.1	26S proteasome non-ATPase regulatory subunit 3
24.6055	24.3996	24.5656	24.9784	24.3142	24.8332	24.8719	24.6421	24.3935	24.8372	25.123	24.7389	0	503820000	3	12	168	ACN10438.1;ACI67277.1;ACH71009.1	40S ribosomal protein S3
23.7243	23.6199	23.4853	23.7511	23.6859	23.4143	23.494	23.7386	23.7001	23.3727	23.4666	23.3668	0	226030000	3	7	64	NP_001167032.1;ACI33964.1;ACH71025.1;ACN10869.1	tubulin, alpha 8 like 3-1
20.4107	NaN	NaN	20.7778	20.1916	20.3043	NaN	NaN	20.336	21.1944	21.1293	NaN	0	22093000	3	3	15	ADM16105.1;ACN12509.1;ACN11264.1;ACN10157.1;ACM09812.1;ACI67036.1;ACH71032.1;NP_001133216.1;ACH71033.1	Nuclease-sensitive element-binding protein 1
20.5411	20.5629	20.239	20.3242	20.1383	20.4807	19.9488	20.4235	20.0639	20.3808	20.1947	20.2827	0	23809000	3	3	21	ACH85258.1	chaperonin containing TCP1, subunit 3
25.3066	25.4099	25.489	25.2312	25.1567	25.1497	25.3025	25.3721	25.2274	25.3364	25.0875	25.4279	0	755780000	3	14	318	NP_001133249.1;ACI32899.1;NP_001133202.1;NP_001133201.1;ACH70964.1;ACH70963.1	phosphoglycerate mutase 1
19.4865	19.4532	19.3346	19.4026	19.4649	19.4816	19.3535	NaN	19.6312	19.5833	20.1426	19.3885	0.0010549	12921000	3	3	5	ACI32906.1	Tubulin alpha chain
22.1281	21.8427	21.9001	21.6817	21.6608	21.9169	22.1049	21.9453	22.0095	21.4693	21.7547	21.6518	0	68200000	3	8	44	NP_001135184.1;ACI32941.1	Serine/threonine-protein phosphatase PP1-gamma catalytic subunit
21.8491	21.687	21.0805	21.2616	21.7088	21.3964	21.5458	21.1006	21.7909	21.2538	21.6538	21.5651	0	52651000	3	3	33	ACI32943.1	Rho GDP-dissociation inhibitor 1
21.008	20.3451	19.9863	19.2434	20.1992	19.9509	20.7772	20.0714	20.7959	19.8331	19.2638	20.7969	0	22533000	3	3	17	NP_001133331.1;ACI33043.1	Lysosomal acid lipase/cholesteryl ester hydrolase precursor
20.7767	20.0332	20.3802	20.1172	19.4804	NaN	20.0931	19.4799	20.3655	19.349	20.586	19.9433	0	20474000	3	3	9	NP_001133363.1;ACI33093.1	Phosphoacetylglucosamine mutase
19.3861	19.889	19.7618	19.3478	19.7392	19.8211	19.2973	19.3931	19.5163	19.8231	19.6647	NaN	0	13492000	3	3	19	ACI33963.1;ACI33116.1;ACH85255.1;ADM16186.1;ACI68572.1	ELAV-like protein 1
20.1926	20.034	20.2869	20.8372	20.3941	20.4769	20.4539	20.7569	20.5608	21.2157	20.784	21.1469	0	28992000	3	3	21	ACN11168.1;ACM09105.1;ACM08502.1;ACI33863.1;ACI33187.1;ACI69928.1;ACM09579.1;ACM09449.1	ADP-ribosylation factor 4
21.8008	21.923	21.8914	NaN	21.7448	21.9244	NaN	NaN	21.976	22.2096	NaN	21.8912	0	52585000	3	3	5	ACI33192.1	Mitochondrial carnitine/acylcarnitine carrier protein
20.8993	21.0431	20.8842	20.5615	21.1316	20.8843	20.9727	21.06	21.1022	20.8077	20.7795	20.8407	0	35263000	3	4	31	ACI33276.1;ACM08443.1	Tropomyosin-1 alpha chain
19.4099	NaN	18.914	19.3026	19.5881	20.028	19.7237	19.253	20.1942	19.3414	19.1586	19.3689	0	13017000	3	3	12	NP_001135210.1;ACI33325.1	Probable oxidoreductase C10orf33
19.5153	19.4834	19.9522	19.5133	19.7266	19.5313	19.4415	NaN	19.6862	20.72	19.7146	19.3323	0	15806000	3	3	11	ACM09820.1;ACI69808.1;ACI33398.1	28 kDa heat- and acid-stable phosphoprotein
19.917	19.9145	19.8119	19.772	19.6591	19.8936	19.8332	19.8587	19.7173	19.8533	20.1239	19.9099	0	17010000	3	3	13	ACI33415.1;ACI67990.1;AGH92607.1	Tumor protein D54
19.9963	20.0431	20.0589	19.8107	20.1637	20.0115	19.8914	19.9927	20.4562	19.9752	20.2342	19.7533	0	19395000	3	3	24	ACI33537.1	Interleukin enhancer-binding factor 2 homolog
19.4111	19.4959	19.7373	19.1044	19.3073	NaN	19.3122	19.2896	19.6827	19.301	19.2788	19.2421	0	11661000	3	3	5	NP_001133603.1;ACN11402.1;ACI33554.1	Septin-7
20.3674	20.6389	19.832	20.3579	20.6165	20.8147	20.2637	18.6701	20.0323	20.2636	20.8849	19.9647	0	23041000	3	3	16	NP_001133621.1;ACI33588.1	Phenylalanyl-tRNA synthetase alpha chain
20.621	20.9834	20.9895	21.2022	20.5669	NaN	21.1752	21.056	20.6071	20.8048	21.3743	20.8489	0	37104000	3	3	17	NP_001133640.1;ACI33622.1	Heterogeneous nuclear ribonucleoprotein M
19.0282	18.3317	19.997	18.9353	19.7408	18.6423	NaN	18.5488	19.3026	20.6197	19.6613	18.9267	0	11592000	3	3	6	ACI33698.1	B-cell receptor-associated protein 31
23.3189	23.7711	24.1979	23.4702	24.103	23.3489	23.5984	23.9789	24.3143	24.0059	23.5544	24.0026	0	267820000	3	6	72	NP_001133774.1;ACI33877.1	Catalase
19.609	19.7261	19.8566	19.6428	19.6477	20.0506	19.8144	20.0625	19.792	19.7173	20.346	19.8222	0	17066000	3	3	5	ACN12473.1;ACN10122.1;ACM08568.1;ACI68708.1;ACI67438.1;NP_001133788.1;ACI33901.1;ACI67119.1;ACI66055.1	BCCIP homolog
21.2182	20.7431	20.8236	20.6117	20.8964	20.5473	20.7254	20.8308	21.2448	20.6092	20.5256	20.7904	0	32788000	3	3	18	NP_001133828.1;ACI33972.1;ACN11254.1	Ganglioside GM2 activator precursor
19.655	19.4734	19.4901	19.6824	20.0865	19.9739	19.6807	19.594	20.2865	19.8805	19.9724	19.859	0	16441000	3	3	26	NP_001133844.1;ACI34005.1	protein phosphatase 1G
20.2428	19.9783	20.2356	20.0782	19.8539	20.1129	20.1134	20.0552	20.1454	19.9095	19.932	20.1813	0	19924000	3	3	11	NP_001133886.1;ACN11334.1;ACI34079.1	Splicing factor, arginine/serine-rich 9
19.3058	19.2975	19.334	19.3647	19.2248	19.1958	19.474	19.9505	19.4574	19.0585	19.2167	19.0796	0	12760000	3	3	4	NP_001135277.1;ACI34152.1	Ethanolamine kinase 1
19.3112	19.6326	19.5202	19.6222	19.2627	20.2994	19.4599	19.5837	19.4505	20.1489	20.263	19.489	0	15769000	3	3	7	NP_001133937.1;ACI34174.1	Arginyl-tRNA synthetase, cytoplasmic
18.794	18.8012	18.5728	18.5605	18.8809	18.9003	18.7013	18.7451	18.713	18.5254	18.874	18.6934	0	7881800	3	3	6	CAA06161.1;ACI34186.1;CAA06159.1;NP_001117176.1;CAA06160.1;ACM08787.1	U2 snRNP-specific A protein
19.6921	20.9493	20.1727	19.7399	19.7267	19.3364	19.514	19.6361	NaN	NaN	19.2123	19.5648	0	15465000	3	3	14	NP_001133964.1;ACI34228.1	tubulin-folding cofactor B
20.8415	20.4072	20.9659	20.7909	20.7416	20.8614	21.0695	20.5296	20.5553	21.1071	20.8673	20.6272	0	32872000	3	3	22	ACI66997.1;ACI66043.1;ACI66372.1	Cytochrome c oxidase polypeptide VIc precursor
20.7272	20.4981	20.346	20.815	20.0156	21.015	20.5158	20.8683	20.3591	20.7496	21.1908	20.6418	0	31181000	3	3	24	NP_001134062.1;ACN12483.1;ACN10132.1;ACM09758.1;ACM09252.1;ACM09246.1;ACM08653.1;ACI66091.1;ACM08223.1	epididymal secretory protein E1 precursor
21.4116	21.4468	21.6945	21.6744	21.5228	21.8351	22.0374	21.6724	22.0522	21.4556	21.962	21.9149	0	61703000	3	5	29	ACI66182.1;ACM08352.1	Profilin-2
20.4932	20.5183	20.288	20.7259	20.9624	20.9286	20.9479	20.597	21.0017	20.8135	21.0685	20.581	0	31185000	3	3	15	NP_001134175.1;ACI66473.1	Acidic leucine-rich nuclear phosphoprotein 32 family member A
21.3339	21.1764	20.9136	21.361	20.6883	21.1508	21.5915	21.1724	21.4779	21.0606	21.0066	20.7876	0	42946000	3	3	19	ACI66474.1;ACN12672.1;ACN10312.1;NP_001133211.1;ACH71015.1	ADP/ATP translocase 2
20.8811	20.7739	20.7126	20.649	21.0528	21.2062	20.9444	20.9727	20.992	21.2486	20.9068	20.6209	0	36232000	3	3	13	ACI66788.1	Heme oxygenase
20.7861	20.9427	20.7761	21.2933	20.6175	20.6156	20.6891	21.5684	20.7788	20.9278	20.8186	21.0282	0	36046000	3	3	18	NP_001134251.1;CAD80246.1;ACI66799.1	Cathepsin M precursor
19.5577	19.7447	19.2274	20.4579	19.7839	19.91	20.124	19.9489	NaN	19.9686	20.4007	20.1842	0	18260000	3	3	10	ADM15882.1;ACN12521.1;ACN10168.1;ACM09385.1;ACM08664.1;ACI69978.1;ACI68366.1;ACI66905.1;ACI70176.1;ACI67134.1;ACI69409.1;ACM08777.1	Eukaryotic translation initiation factor 1b
23.5865	23.5384	23.6466	23.2453	23.7903	23.6926	23.341	23.2444	23.6754	23.4294	23.3235	23.5982	0	214120000	3	10	103	NP_001134295.1;ACI66947.1	peroxiredoxin-1
20.4949	20.3836	19.7965	19.9245	20.107	20.5431	20.0567	20.2439	19.9329	19.6559	19.8378	20.2377	0	21131000	3	3	20	NP_001134324.1;ACN12562.1;ACI69290.1;ACI67059.1	Delta-aminolevulinic acid dehydratase
20.4544	20.1817	20.5496	20.4578	20.2495	20.8443	20.3095	20.2353	20.2187	20.5282	20.6347	20.1551	0	25398000	3	3	14	ACN12553.1;ACN10199.1;ACI69792.1;ACI68968.1;ACI67955.1;ACI67664.1;ACI67280.1;ACI67102.1	Mitochondrial import inner membrane translocase subunit Tim13
20.5557	20.6171	20.6737	20.1721	20.5662	20.1819	20.5632	20.5303	20.2268	20.543	20.5751	20.358	0	26285000	3	3	20	NP_001135388.1;ACI67111.1	3-hydroxybutyrate dehydrogenase type 2
19.6264	19.8121	20.3456	19.4367	19.8116	19.6992	19.8197	19.8957	19.9656	19.4595	19.6924	19.7594	0	15702000	3	3	19	NP_001134347.1;ACI67158.1;ACN60215.1;ACH85286.1;NP_001192039.1;NP_001117088.1;ACN12494.1;ACN10143.1;ACM08942.1;ABO14977.1	Ubiquitin-conjugating enzyme E2 variant 1
21.6299	22.7476	21.6382	21.9749	22.0916	21.7157	21.5446	22.2779	21.776	22.1458	22.0709	21.8963	0	76722000	3	3	29	ADM16289.1;ADM16216.1;ADM16161.1;ACN12237.1;ACN09890.1;ACI70094.1;ACI69647.1;ACI69613.1;ACI69222.1;ACI67171.1;ACI68625.1	Ictacalcin
NaN	19.5565	NaN	19.2939	19.298	19.2912	NaN	19.3769	19.3354	19.6344	NaN	19.4709	0	10913000	3	3	4	NP_001135319.1;ACN12484.1;ACN10133.1;ACI67190.1	Pyroglutamyl-peptidase 1
23.0667	23.0219	23.0515	23.4478	23.1298	23.3613	23.3337	23.1045	22.7546	23.0686	23.5847	23.3176	0	176380000	3	3	32	ACI67629.1;ACN12373.1;ACN10026.1;ACI69670.1;ACI69227.1;ACI67287.1;ACI68468.1;ACI69263.1;ACI66954.1;ACI68271.1	60S ribosomal protein L27
21.0106	20.5841	20.7007	21.0782	20.3034	20.8617	21.3984	21.2281	20.9419	20.3892	20.5009	20.7982	0	34667000	3	3	24	ACN12535.1;ACN10181.1;ACI69818.1;ACI69423.1;ACI68940.1;ACI67352.1;ACI68057.1	ATP synthase subunit O, mitochondrial precursor
20.9198	21.0593	21.947	20.5348	21.3065	20.6483	20.8025	20.0618	21.2169	20.9726	20.4052	20.7358	0	35219000	3	3	25	NP_001134477.1;ACM09683.1;ACM09454.1;ACM08584.1;ACM08276.1;ACI67675.1;ACI67532.1;ACN12314.1;ACN09967.1	Activated RNA polymerase II transcriptional coactivator p15
20.6851	20.979	19.8448	20.3079	20.3833	20.498	19.9552	20.2037	20.4283	20.35	20.1297	20.2648	0	24427000	3	3	14	NP_001134459.1;ACM08680.1;ACM08501.1;ACI67614.1;ACI67564.1	Tubulin-specific chaperone A
22.0779	21.8555	21.4568	21.9485	21.8726	21.8092	21.8257	21.789	22.3378	22.1555	21.9121	22.0343	0	70529000	3	4	45	ACM09614.1;ADM16268.1;ACI67738.1;ACM09753.1	THO complex subunit 4
20.1464	20.0102	19.3405	20.1451	19.6952	19.9711	19.7369	19.7488	20.0228	19.5799	19.8312	19.6171	0	16432000	3	3	18	ACI67739.1;NP_001134036.1;ACI34356.1	Hydroxyacylglutathione hydrolase
19.5458	19.5291	19.2582	NaN	19.4214	NaN	NaN	NaN	19.2184	NaN	NaN	NaN	0	8970500	3	3	5	NP_001134536.1;ACI67919.1	Argininosuccinate synthase
20.0774	20.2251	19.3591	19.5858	19.841	20.479	20.028	19.552	20.1269	20.4339	19.9422	20.8122	0	19934000	3	3	6	NP_001134570.1;B5XB27.1;ACI68047.1	kynurenine formamidase
22.4271	21.8568	22.216	21.3311	21.8023	21.8429	21.8533	22.2234	22.8949	21.8138	21.5192	21.8874	0	75809000	3	3	31	ACM09813.1;ACI68135.1	Dipeptidyl-peptidase 1 precursor
22.0936	21.9539	21.7576	22.5877	21.9722	22.3875	22.3043	21.8462	21.9342	22.76	23.1034	22.3099	0	94227000	3	3	29	ADM16116.1;ACI70054.1;ACI69353.1;ACI68250.1;ACI68140.1	FK506-binding protein 11 precursor
20.1743	19.6125	19.4069	19.4792	20.1524	19.853	19.7382	19.3593	20.1065	19.7145	20.1446	19.669	0	16238000	3	3	15	NP_001134630.1;ACI68269.1	Transmembrane protein 14C
21.2353	21.3579	20.4445	20.99	21.3847	21.2601	20.9694	21.0471	21.8072	21.0126	21.4802	21.0626	0	51539000	3	3	41	ACI68347.1	Complement component 1 Q subcomponent-binding protein, mitochondrial precursor
19.9753	19.6524	20.1883	20.0232	19.9991	20.0646	NaN	20.1784	20.1441	20.3583	20.3016	NaN	0	18538000	3	3	13	ACI68415.1	Methionine-R-sulfoxide reductase B2, mitochondrial precursor
NaN	NaN	NaN	NaN	NaN	20.1265	20.4979	21.4016	20.4309	NaN	20.4359	NaN	0.0010741	23149000	3	3	5	NP_001134684.1;ACN12686.1;ACN10517.1;ACN10326.1;ACI68482.1	Glutamine synthetase
19.6031	19.4696	18.9833	19.8004	19.6519	19.7304	19.2528	19.7058	18.9603	19.6336	20.2862	19.4218	0	14303000	3	3	21	ACI68616.1	Tyrosyl-tRNA synthetase, cytoplasmic
25.2215	25.4802	25.2008	24.6873	24.4449	24.9693	25.0289	24.9463	25.2837	24.9987	24.2787	25.2598	0	625790000	3	6	65	ADM15890.1;ACM09324.1;ACM08272.1;ACI68855.1;ACI68832.1;ACM08253.1	D-dopachrome decarboxylase
21.8177	21.7976	21.5565	21.7031	NaN	21.5898	21.8598	21.7852	NaN	NaN	21.4534	21.7476	0	61705000	3	3	7	NP_001134788.1;ACI68882.1;ACG60322.1;ACG60321.1	Arginase-1
20.0754	20.5862	20.1538	20.8362	20.8065	20.6811	20.5756	20.6661	20.5564	21.1629	21.0832	21.0085	0	31054000	3	3	30	ACN12433.1;ACN10086.1;ACI69060.1;ACI69109.1;ACI66894.1	Transcription factor BTF3 homolog 4
20.7383	20.7048	21.2534	21.4657	21.5184	21.3893	21.3469	21.6613	20.7549	22.4873	21.948	21.926	0	54723000	3	3	35	ACI69072.1;NP_001135088.1;ACN12462.1;ACN12370.1;ACN10112.1;ACN10023.1;ACI70199.1;ACI70001.1;ACI69424.1;ACI69157.1;ACI69453.1	transport protein Sec61 subunit beta
22.6068	22.4209	22.4892	22.7618	22.3864	22.7717	22.9081	22.8868	22.616	22.573	22.6366	22.6954	0	121190000	3	7	62	ADM15936.1;ACI69604.1	Thioredoxin-dependent peroxide reductase, mitochondrial precursor
19.2951	19.2853	18.8588	19.4404	19.6237	19.2865	19.1791	19.6246	19.7392	19.327	19.3101	19.0186	0	12213000	3	3	15	NP_001134958.2;ACI69639.2	Transcription elongation factor B polypeptide 2
22.2134	22.0602	21.9016	22.4142	22.0651	22.2128	22.0592	21.9536	21.9098	21.7651	22.1745	22.0981	0	80647000	3	3	38	ACI69656.1	Peroxiredoxin-4
20.8158	20.5873	20.9238	20.5627	20.7932	20.7784	20.5245	20.6225	20.8626	20.9222	20.6667	20.56	0	31014000	3	3	23	NP_001135000.1;ACI69817.1	S-formylglutathione hydrolase
20.2103	20.0837	19.8898	20.0309	20.338	19.9703	19.9271	20.2551	20.1236	19.9579	20.0763	20.0336	0	20328000	3	3	9	ACI69869.1;ACI67788.1	NADH dehydrogenase iron-sulfur protein 3, mitochondrial precursor
21.5241	20.7446	19.9533	20.4452	22.0363	21.0558	19.9728	21.0027	20.7628	22.2577	22.5876	21.2327	0	46640000	3	3	26	ACI69895.1;ADM16276.1;ACI68588.1	Lipocalin precursor
23.85	24.0923	24.7966	22.949	24.2565	24.0314	24.2763	24.2741	24.0192	24.1351	23.8094	24.1244	0	319880000	3	5	99	ACM08612.1	Ribonuclease UK114
22.3552	22.066	22.269	22.0597	22.1859	22.1223	22.2247	21.9237	22.1487	22.0706	22.042	NaN	0	80493000	3	3	15	ACM08924.1;ACI68551.1;ACI68308.1	ATP synthase subunit e, mitochondrial
23.6333	23.2974	23.3534	23.8722	23.5234	23.8427	23.7	23.4285	23.2985	23.9538	24.0577	23.6122	0	239510000	3	6	88	NP_001139966.1;ACN12343.1;ACN09996.1;ACM08935.1;ACN12213.1;ACN09866.1;ACM09279.1	40S ribosomal protein S17
21.1936	20.9083	20.9009	21.0199	20.9045	21.2631	21.1041	20.9804	20.7059	20.909	21.4386	20.904	0	39038000	3	3	23	NP_001139996.1;B9ENM6.1;ACM09123.1	ubiquitin-fold modifier 1
19.1989	21.133	19.036	19.1399	18.7209	18.588	19.1686	19.4718	NaN	18.4875	18.8352	18.9619	0	12530000	3	3	5	NP_001140065.1;ACN12441.1;ACN12367.1;ACN10093.1;ACN10020.1;ACM09472.1	Cytidine deaminase
19.8562	19.6238	19.9153	19.9451	19.7697	19.7728	19.7991	20.1817	20.094	20.1148	19.896	19.8128	0	17912000	3	3	15	ACM09479.1;ACN60184.1;ACI66637.1;ACI33727.1	Mitochondrial carrier homolog 2
23.1194	22.818	22.6911	23.2042	23.1242	23.3155	23.2145	22.8865	22.9108	22.6628	23.2748	23.0221	0	154710000	3	3	38	AGH92595.1;ACN12434.1;ACN10087.1;NP_001134636.1;AGH92633.1;ACN12222.1;ACN09875.1;ACI68293.1;ACH71002.1;ACH71001.1	ribosomal protein S26
21.0214	21.1306	21.0294	20.8932	21.2082	20.9481	20.8487	21.3754	21.5056	21.0672	20.9444	21.0119	0	40073000	3	4	31	ACN12574.1;ACN10728.1;ACN10219.1;ACM09809.1;ACM08561.1;ACM09811.1;ACM09189.1	Cathepsin B precursor
NaN	19.6603	NaN	20.3964	20.495	20.1794	20.3709	20.837	20.4633	21.0756	20.6318	20.5624	0	25183000	3	3	16	ACN12696.1;ACN10336.1	Phosphate carrier protein, mitochondrial precursor
23.3828	23.5783	23.6271	23.5966	23.3819	23.6494	23.8347	23.8662	23.6745	23.7756	23.6013	23.9143	0	245050000	3	10	109	ACN12769.1;ACN10404.1	Hydroxysteroid dehydrogenase-like protein 2
21.9622	22.6008	22.6089	22.1572	21.7208	22.2287	22.1825	23.0499	22.5803	22.1886	21.5852	22.4567	0	99639000	3	3	36	ACN10606.1	NADP-dependent malic enzyme, mitochondrial precursor
21.0394	21.3806	20.2797	20.3104	21.5055	20.7785	20.2812	20.2621	NaN	20.7367	20.314	20.5838	0	29822000	3	3	19	NP_001158867.1;ACN10644.1	legumain precursor
19.2278	19.1767	NaN	19.2881	19.3795	19.4405	19.6142	NaN	19.7273	NaN	NaN	19.1976	0	11073000	3	3	4	NP_001167060.1;ACN10713.1	Erlin-2 precursor
NaN	NaN	NaN	NaN	20.2282	20.3461	NaN	NaN	19.6567	NaN	20.3418	20.4026	0	19644000	3	3	6	NP_001167116.1;ACN10868.1;ACN60205.1	Coagulation factor XIII A chain
20.1416	20.2832	20.0951	20.2839	19.9876	19.8979	19.8997	20.2087	20.1642	20.323	20.0094	19.9794	0	20205000	3	3	22	NP_001167275.1;ACN11253.1	Splicing factor U2AF 65 kDa subunit
21.8868	21.4195	21.3832	21.5057	21.6563	21.5031	22.0348	21.8195	21.8931	21.3947	21.3869	21.8367	0	59449000	3	7	37	ACN11335.1	Peroxisomal 3,2-trans-enoyl-CoA isomerase
20.2079	20.2157	20.3995	20.2983	20.3041	20.4144	20.4027	20.6465	20.4514	20.7971	20.9287	20.9021	0	27383000	3	4	25	ACN11413.1;ACN11075.1;ACM08940.1;NP_001134795.1;ACI68921.1	Ras-related protein Rab-1A
24.1415	23.9774	23.7885	23.7726	24.206	23.9755	23.9385	NaN	24.1359	23.9302	23.9229	23.9175	0	256360000	3	3	12	ACN58600.1;ACN58687.1	5-3 exoribonuclease 2
19.9694	20.0849	19.6472	20.2094	19.933	20.4035	20.7188	20.3354	20.6567	20.4478	19.9339	20.6629	0	23277000	3	3	20	ACN58710.1	Dihydrolipoyl dehydrogenase, mitochondrial precursor
19.5121	19.9985	19.2801	19.0146	19.3634	19.4402	19.3142	19.3506	19.4047	19.6786	NaN	19.3463	0	12644000	3	3	11	ACN60210.1	Copine-3
24.2414	25.0762	25.0256	24.4726	24.3435	23.6658	24.4854	25.3643	24.2749	24.4814	23.6332	24.7421	0	471400000	3	3	77	ACN60279.1	Transketolase-like protein 2
22.1389	22.015	21.9116	22.1643	21.7213	21.9847	22.1214	22.0595	21.878	21.6674	22.1403	21.8536	0	75500000	3	3	41	AGT57170.1;NP_001139945.1;ACM09821.1;ACM08820.1;ACM09718.1	heat shock protein 90-beta 2
23.8522	23.6652	23.7541	23.7269	23.9643	23.8134	23.5766	23.7085	23.6916	24.4702	24.1945	24.1513	0	358980000	3	3	41	P84408.3;CAI46350.1	H1_SALSA RecName: Full=Histone H1;Contains: RecName: Full=SAMP H1;>gi
19.6067	19.7418	19.3989	19.3137	19.7439	19.2374	19.5532	19.7337	19.8441	19.508	18.9443	19.7447	0	13893000	3	3	22	DAA64401.1	TPA_inf: aldehyde oxidase beta
18.2755	18.905	18.4627	NaN	19.9287	NaN	NaN	NaN	18.753	NaN	NaN	17.9485	0	4553100	2	2	2	ADD59895.1;ADD59861.1;AAB24064.1;ACN12780.1;ACN10415.1;ACN12608.1;ACN10252.1;ACN10898.1;ACI33025.1	immunoglobulin mu heavy chain constant region
22.5999	22.8878	22.7696	22.8333	23.0567	23.1733	23.2549	23.4411	23.1743	23.6026	23.3974	23.3195	0	170820000	2	5	69	NP_001117051.1;ACI66231.1;ACI33556.1;AAT77220.1	C type lectin receptor A
NaN	NaN	21.0967	20.5678	20.9671	20.4917	20.4345	20.5077	NaN	NaN	20.7057	20.5398	0	24629000	2	2	15	ACI33769.1;ACH70649.1	14-3-3 protein epsilon
20.3619	20.1727	20.3668	20.3348	20.5409	20.281	20.2844	NaN	20.7601	20.2466	20.4899	20.3001	0	22806000	2	2	21	NP_001133116.1;ACM09470.1;ACH70715.1;ACN11079.1	heterogeneous nuclear ribonucleoprotein D-like
21.1644	21.4315	21.0259	21.3317	21.4484	21.3878	20.9847	20.979	21.1832	21.2966	21.1544	21.2649	0	43503000	2	5	23	ACI67932.1;ACH70727.1;ADM16017.1;ACI68584.1	Proteasome subunit alpha type-1
21.1323	21.4997	21.4366	21.4387	NaN	21.5757	21.4404	21.685	21.316	21.4006	21.4708	NaN	0.0010764	48009000	2	2	8	NP_001167030.1;ACI33892.1;ACH70742.1;ADM15998.1;ACN12456.1;ACN10107.1;ACM09631.1;ACM08362.1;ACI66412.1;ACI33932.1	ADP-ribosylation factor 1 like
20.6593	20.5318	NaN	NaN	20.5862	19.9714	20.4854	20.5517	20.8051	NaN	NaN	20.3094	0	19547000	2	2	15	NP_001133129.1;ACH70743.1;NP_001133322.1;ACI33027.1;ACM08885.1	microtubule-associated protein RP/EB family member 1
25.5388	25.5236	24.8593	25.839	25.9771	25.9904	25.6648	25.7483	26.403	25.9887	26.0668	25.84	0	1061100000	2	2	72	AGH92507.1;ADM16206.1;ADM15975.1;ACN12601.1;ACN12557.1;ACN10246.1;ACN10203.1;ACM09780.1;ACM09352.1;ACM09185.1;ACM08967.1;ACM08661.1;ACM08300.1;ACI70069.1;ACI69310.1;ACI68375.1;ACI68311.1;ACI67783.1;ACI67089.1;ACI34226.1;ACI33957.1;ACI33069.1;ACH70745.1;ADM16046.1;ACI68993.1;ACI66048.1;ACM08344.1	histone H3.3
24.1794	23.9438	24.0127	24.0371	23.7152	23.9871	24.2205	24.215	24.116	24.32	24.0609	24.0526	0	322210000	2	2	29	NP_001133132.1;ACH70752.1	ATP synthase subunit alpha, mitochondrial
NaN	19.3329	NaN	NaN	19.2119	19.4718	19.3476	NaN	NaN	NaN	19.3262	19.4207	0	11285000	2	2	6	NP_001133162.1;ACH70834.1;ACY30363.1	RAC-beta serine/threonine-protein kinase
22.0079	22.0123	22.038	22.1512	21.7673	22.3429	22.2455	22.6445	21.92	22.3131	22.4896	22.0296	0	89243000	2	2	16	NP_001135169.1;ACH70868.1	60S ribosomal protein L6
18.8323	18.9636	18.1899	18.809	19.0013	18.8701	18.5874	18.5968	18.7772	18.7412	18.9864	18.759	0	8025200	2	2	18	NP_001167031.1;ACI68381.1;ACH70869.1	calpain small subunit 1
26.0216	26.0523	26.2211	25.954	25.8887	25.9823	25.9485	26.208	26.0008	25.922	25.8469	25.9803	0	1231700000	2	18	282	NP_001133198.1;ACI68017.1;ACH70949.1;ACI66741.1	malate dehydrogenase 2-2, NAD (mitochondrial)
20.0776	20.1922	21.9096	20.8431	20.4201	20.1279	20.7651	19.6339	19.7324	21.4021	20.6481	20.1116	0	29126000	2	2	28	NP_001133206.1;ACI70124.1;ACI67556.1;ACI67392.1;ACH70985.1;ACH70984.1;ACH70983.1;ACI68671.1;ACN12655.1;ACN10296.1;ACN12280.1;ACN09933.1;ACN12173.1;ACN09826.1	ribosomal protein L36a-2
22.4962	22.2872	22.4321	22.7787	22.4184	22.42	22.4255	22.4606	22.7848	22.6204	22.6307	22.4292	0	108250000	2	7	43	ACI33720.1;ACH71030.1	Voltage-dependent anion-selective channel protein 2
24.435	24.3038	24.224	24.6517	24.8288	24.6188	24.5507	24.1417	24.7999	24.6168	24.8379	24.3611	0	431440000	2	4	92	ACM09686.1;ACM08627.1;ACH71044.1;ACN12363.1;ACN10016.1;ACI68941.1	60S acidic ribosomal protein P1
NaN	19.9923	NaN	NaN	20.1006	19.8802	19.9565	NaN	19.6525	NaN	NaN	NaN	0	13253000	2	2	19	ACH85272.1;ACI68879.1	26S proteasome subunit
21.4133	21.3656	21.0459	21.8111	21.3719	21.8635	21.6431	21.361	21.0158	21.7668	22.1472	21.5591	0	56746000	2	2	37	ACH85280.1;AGH92620.1;ACN12349.1;ACN10002.1;ACM09620.1;ACM08734.1	ribosomal protein S17
20.2447	19.6677	19.3685	19.3853	19.7852	20.1768	19.8496	19.8	20.1083	19.8072	20.1129	19.6733	0	16941000	2	2	13	ACH85302.1;ACN12202.1;ACN09855.1;ACM09354.1;ACI68589.1;ACI68514.1;ACI68054.1	mitochondrial complex I subunit NDUFAB1-like
22.1676	21.7774	21.4909	22.0941	22.2167	22.2584	21.9424	21.5852	21.8157	22.2081	22.3811	21.8215	0	74888000	2	2	25	ACH85337.1;AGH92536.1;ACN12200.1;ACN09853.1;ACI69349.1;ACI69831.1	40S ribosomal protein S4
24.9144	24.5984	24.6388	25.0798	24.8466	25.0454	25.0116	24.6938	24.6843	24.9136	25.1471	24.8443	0	558530000	2	12	129	ACH85370.1;ACI69116.1;ACI67685.1;ACN12376.1;ACN10029.1	40S ribosomal protein S4
20.0401	20.2744	19.5799	20.2151	20.4394	20.5586	20.2927	20.1328	20.1597	20.0721	20.3046	20.3361	0	22303000	2	2	26	NP_001133254.1;ACM09734.1;ACI32909.1	Acyl-protein thioesterase 2
19.6012	19.611	19.7134	19.8546	19.4606	19.463	19.6423	19.6846	19.576	19.6287	19.76	19.6545	0	14896000	2	2	8	ACN10992.1;NP_001133309.1;ACI33007.1	Ubiquilin-4
20.6726	21.355	21.813	21.8517	21.124	20.8191	20.6732	21.8973	20.9229	22.3272	20.7936	21.5079	0	49509000	2	6	26	NP_001133323.1;ACI33028.1	Probable saccharopine dehydrogenase
19.8692	19.8647	19.4997	19.821	20.1154	19.8848	19.7511	19.9713	20.0159	20.0059	20.279	19.9545	0	17876000	2	2	19	ACI33352.1;NP_001133374.1;ACI33108.1	Nuclear receptor coactivator 5
18.8931	18.8656	18.7428	19.014	18.8293	19.3516	18.9603	18.8788	18.7996	19.0485	19.2454	18.8734	0	9344000	2	2	4	NP_001133392.1;ACI33145.1	Cysteinyl-tRNA synthetase, cytoplasmic
19.0027	19.1733	NaN	19.1239	19.4422	19.0019	19.1482	19.6185	19.0728	19.7713	19.1254	19.5291	0.0010776	11113000	2	2	6	ACI33167.1;ACI34125.1	ADP-ribosylation factor 6
26.6271	26.4721	26.3841	27.0467	26.657	26.9098	26.7123	26.5938	26.6403	26.8289	27.0966	26.7119	0	2064700000	2	42	596	NP_001133466.1;ACI33293.1	Elongation factor 2
20.5455	20.6806	20.7028	NaN	20.7436	NaN	NaN	20.5469	20.7508	NaN	20.6578	NaN	0	24820000	2	2	18	ACM08669.1;ACI68185.1;ACI66038.1;ACI33414.1	Enhancer of rudimentary homolog
19.354	19.9238	19.8503	19.5952	19.9074	19.4777	19.3245	19.3926	19.473	19.4543	19.6431	19.2759	0	13482000	2	2	11	ACN10986.1;ACI33535.1	Splicing factor, arginine/serine-rich 5
19.851	19.8567	NaN	19.7264	NaN	19.7568	19.8537	19.8721	NaN	NaN	19.7494	19.7738	0.0010582	14047000	2	2	8	NP_001133612.1;ACN10781.1;ACI33569.1	AP-2 complex subunit mu-1
21.0891	21.0431	21.4766	21.3471	21.1525	21.4546	21.5035	21.0533	20.8765	21.5057	21.5337	21.2568	0	46811000	2	5	27	ACI33868.1;ADM16001.1;ACI67880.1	Proliferation-associated protein 2G4
19.1331	18.6694	18.6374	18.9199	NaN	19.156	NaN	20.075	19.6872	18.6692	18.8917	NaN	0.0030211	8486100	2	2	8	NP_001135269.1;ACN10844.1;ACI34091.1;ACI68245.1	Very long-chain acyl-CoA synthetase
22.2902	20.9843	21.5641	21.1865	21.3946	21.7761	21.7425	21.5548	21.6824	20.6496	21.5952	20.9567	0	52840000	2	4	19	ACI34167.1;ACH85366.1	Proactivator polypeptide precursor
24.1168	23.9971	23.8856	24.551	23.883	24.6606	24.5016	24.2068	24.1604	24.4335	24.7658	24.396	0	384470000	2	13	129	NP_001133952.1;AGH92609.1;ACN12176.1;ACN09829.1;ACI34205.1;ACM09553.1	60S ribosomal protein L7
19.5692	20.1284	19.0936	20.1732	19.5018	19.8614	19.7314	19.4512	19.2469	19.6388	19.683	NaN	0.0021053	14868000	2	2	7	NP_001133968.1;ACI34234.1	Diphosphomevalonate decarboxylase
23.8195	23.9088	23.8199	23.648	24.0352	23.7273	23.6049	23.6924	23.6974	23.677	23.7639	23.643	0	254950000	2	8	87	ACI34249.1	14-3-3 protein epsilon
19.0283	19.3883	NaN	19.8669	19.1665	19.268	18.8587	20.0224	19.0276	19.3661	18.9722	19.6381	0	12374000	2	2	15	NP_001133994.1;ACI34275.1	Cathepsin B precursor
20.1118	20.1626	20.3806	20.1568	19.9576	19.6143	20.1402	20.103	19.8133	19.7707	19.9284	19.7191	0	19121000	2	2	18	ACI68645.1;ACI67803.1;ACI66017.1;ADM16226.1;ACI68580.1;ACI68107.1;ACI66062.1	ATP synthase-coupling factor 6, mitochondrial precursor
21.8553	22.2381	21.7691	21.921	22.1188	22.0313	22.1701	21.969	21.8839	21.9888	21.7503	22.0198	0	74195000	2	4	40	ACN12310.1;ACN09963.1;ACI66031.1;ACI68242.1	Proteasome subunit beta type-2
20.6285	20.67	21.0568	20.5571	20.87	NaN	20.4268	20.3629	21.0631	21.0576	NaN	20.5122	0	29562000	2	3	17	ACI69690.1;ACN12465.1;ACN10115.1;ACI70075.1;ACI69009.1;ACI68593.1;ACI67520.1;ACI67153.1;ACI66384.1;ADM16167.1;ACN12224.1;ACN09877.1;ACI69677.1;ACI69107.1;ACI66386.1;ACI66155.1;ACI67144.1;ACI68215.1;NP_001158768.1;ACN12739.1;ACN10377.1;ACM08649.1;NP_001134664.1;ACI68411.1	Small ubiquitin-related modifier 2 precursor
20.0323	19.8814	19.9594	19.8831	19.8761	19.9498	20.014	19.956	19.9618	19.916	20.304	20.0188	0.0020812	18793000	2	2	12	ACI66163.1;ACI67359.1;ACI66658.1;ACI68131.1;ACI66960.1	Small nuclear ribonucleoprotein Sm D3
20.3454	20.1836	20.1209	20.0993	20.2481	20.0885	20.3018	20.101	20.0263	19.9205	20.2809	20.0092	0	20928000	2	2	9	ACI67414.1;ACI66254.1;ADM16058.1;ACI68923.1;ACI66160.1	H/ACA ribonucleoprotein complex subunit 3
19.6407	19.88	19.7213	19.6356	20.03	19.6994	19.7335	19.5728	20.0254	19.6209	19.8984	19.7221	0	16015000	2	2	10	ACM08998.1;ACI67510.1;ADM16173.1;ACN12291.1;ACN09944.1;ACI68698.1;ACI66367.1;ACI66293.1;ACI68454.1;ACI68244.1	Fatty acid-binding protein, brain
18.0385	18.3229	NaN	17.8055	17.9018	17.7766	18.2032	18.3414	20.0372	17.8668	17.7776	18.4299	0	5961400	2	2	3	NP_001134146.1;ACI66365.1	Cytosolic sulfotransferase 2
21.0601	20.6204	20.7383	20.9683	20.7747	21.1612	21.2282	21.3412	20.5372	20.8122	21.1346	21.1042	0	38280000	2	2	16	NP_001134154.1;AGH92622.1;ADM15911.1;ACI68075.1;ACI66419.1;ACM08978.1	signal peptidase complex subunit 3
20.2081	20.1952	19.2127	19.8665	20.3144	20.0927	20.0646	20.1448	20.7416	20.5084	20.386	20.2932	0	21768000	2	2	11	ACM09341.1;ACM09299.1;NP_001134195.1;ADM16255.1;ACM09425.1;ACI69490.1;ACI67697.1;ACI66967.1;ACI66561.1;ACM08503.1	U6 snRNA-associated Sm-like protein LSm7
19.8984	20.7903	22.4795	20.794	20.462	20.3388	20.4593	21.1683	20.1087	21.2047	21.3182	20.4389	0	37836000	2	2	15	ACI66853.1;ACI66570.1;ACN12299.1;ACN09952.1	Cytochrome c oxidase subunit 5A, mitochondrial precursor
21.871	21.827	20.2388	22.4357	20.9614	22.3195	22.5176	22.3454	22.1638	21.5623	22.1754	22.2242	0	80270000	2	2	28	ACN12612.1;ACN12353.1;ACN10256.1;ACN10006.1;ACI69150.1;ACI68490.1;ACI66605.1	Cytochrome c oxidase polypeptide VIa, mitochondrial precursor
19.4644	19.5351	18.8332	19.6102	19.4101	19.6411	19.7186	20.0151	19.5038	19.6442	19.3678	19.671	0	14303000	2	2	15	ACI67822.1;ACI66612.1	Brain protein 44-like protein
NaN	NaN	NaN	19.5099	NaN	19.6747	NaN	20.0281	NaN	19.4382	19.6299	19.7693	0.0020661	13523000	2	2	6	ADM15875.1;ACI69796.1;ACI69466.1;ACI67486.1;ACI66795.1;ACI68573.1;ACI67590.1;ACI66823.1	NADH dehydrogenase 1 alpha subcomplex subunit 13
20.1284	19.4595	18.9999	19.7637	20.58	20.4757	19.4367	19.3379	19.801	19.0159	19.3787	20.4985	0	16618000	2	2	12	ACI67715.1;ACI66836.1	Flavin reductase
20.1866	20.1401	20.1924	19.872	19.5084	19.6085	20.2346	20.4694	20.3573	19.5249	19.0952	19.7721	0	18994000	2	2	15	ACI66881.1	Mitochondrial uncoupling protein 2
21.0962	21.5563	21.8319	20.8366	21.1274	21.0956	21.7515	21.6671	21.3999	21.4582	20.8518	21.0983	0	48082000	2	4	34	ACI69546.1;ADM15978.1;ADM15930.1;ACN12430.1;ACN10083.1;ACI68652.1;ACI68621.1;ACI67790.1;ACI67065.1	Cytochrome c oxidase subunit 4 isoform 2, mitochondrial precursor
21.4806	21.5244	21.4746	21.4324	21.3875	21.3604	21.5573	21.3378	21.3584	21.4314	21.2408	21.2455	0	49885000	2	2	25	ACM08347.1;NP_001135068.1;AGH92579.1;AGH92562.1;ACN12381.1;ACN12208.1;ACN10034.1;ACN09861.1;ACM09277.1;ACI70077.1;ACI69868.1;ACI67073.1;NP_001135077.1;AGH92525.1;ACI70121.1;ACI66012.1	Dynein light chain 1, cytoplasmic
18.9427	18.7756	18.8184	19.0557	18.8235	18.6142	18.9223	18.3791	NaN	20.8544	19.0111	19.2161	0	10378000	2	2	4	ACI69230.1;ACI68259.1;ACI67127.1	Microsomal glutathione S-transferase 3
NaN	19.2631	18.8572	20.7845	19.5154	NaN	19.7973	19.4396	19.1507	20.397	21.283	19.6411	0	18060000	2	2	16	ACI67133.1;NP_001134841.1;ACI69106.1	Ribosomal protein L22-like 1
19.0334	18.894	NaN	18.9117	19.2062	19.1	19.4571	NaN	NaN	NaN	NaN	18.9704	0	8337700	2	2	5	NP_001135320.1;ACI67219.1;ACM08497.1	Abhydrolase domain-containing protein 14B
19.8374	19.6518	20.0723	19.8449	19.6562	19.6992	19.781	20.1064	19.833	19.763	19.6468	19.7028	0	16637000	2	2	10	NP_001134417.1;ACI69832.1;ACI67430.1	fumarylacetoacetate hydrolase domain-containing protein 1
NaN	NaN	23.8248	22.8781	23.3431	NaN	22.6022	21.9076	23.3408	24.1032	22.9762	22.3506	0	160160000	2	2	33	ACN12320.1;ACN09973.1;ACI69457.1;ACI67673.1;ACN12301.1;ACN09954.1	40S ribosomal protein S28
19.6198	19.7622	19.0532	19.7889	19.7866	20.0836	19.7793	19.553	19.6186	19.7181	20.5676	19.5866	0	16187000	2	2	11	ACI67752.1	canopy homolog 2 precursor
NaN	18.6786	18.5301	NaN	NaN	18.7124	18.7551	19.1812	19.8531	18.7952	18.8444	18.7471	0	8106300	2	2	5	NP_001134524.1;ACI67878.1	peroxisomal trans-2-enoyl-CoA reductase
25.1947	25.2564	24.5842	25.0511	24.8328	25.2106	25.1039	25.2041	25.3224	24.9992	25.0198	25.2308	0	651310000	2	11	97	ACI68104.1;ACN12581.1;ACN10226.1;ACI67300.1;NP_001133173.1;ACH70885.1	Cofilin-2
19.3799	19.4208	18.7058	19.0636	19.8025	19.2593	19.1775	19.2034	19.2783	19.3	19.4808	19.3125	0	11588000	2	2	13	ACI68221.1;ACI33808.1	Vacuolar proton pump subunit E 1
24.8091	25.8166	27.0912	26.3853	25.18	25.526	25.2716	25.9158	24.587	25.626	25.4646	25.5531	0	1034600000	2	8	106	ACN12700.1;ACN12317.1;ACN10340.1;ACN09970.1;ACI70022.1;ACI69659.1;ACI69594.1;ACI68752.1;ACI68322.1;ACI67542.1;CAG14939.1	Acyl-CoA-binding protein
19.218	NaN	19.3683	19.4192	19.2545	19.428	19.3036	19.7312	19.1345	19.3245	19.5495	NaN	0.0010707	11665000	2	2	11	ADM15929.1;ADM15921.1;ACM09712.1;ACM08865.1;ACI69289.1;ACI68324.1	QIL1	gb
19.855	20.258	20.012	20.2289	19.9292	20.0551	19.8466	18.8295	20.1098	19.8358	19.9625	19.9586	0	18062000	2	2	14	ACM08983.1;NP_001134701.1;ADM15931.1;ACI68531.1;ACM09003.1;ACM08287.1	Programmed cell death protein 5
19.4224	19.0781	19.3552	19.3731	19.3949	NaN	19.2769	19.2635	19.6504	19.9977	19.1279	19.0737	0	11711000	2	2	4	ACI68724.1	AMBP protein precursor
20.5711	20.0442	20.3775	20.631	20.3506	20.4122	20.5887	20.9841	19.9742	20.7295	20.7072	20.5741	0	28517000	2	4	16	ACI68772.1	Proliferation-associated protein 2G4
19.9976	20.1401	NaN	19.8864	19.8299	19.8525	20.1024	19.8182	20.0118	19.6271	19.9574	20.0556	0.0029674	17634000	2	2	19	ADM16164.1;ACI68959.1	Phosphoglycerate mutase 1
20.3349	20.3489	20.5748	20.7611	19.7243	20.4052	NaN	NaN	20.1064	20.8102	20.5474	20.2602	0	21950000	2	2	17	NP_001134808.1;ACI70190.1;ACI68987.1	Pyrroline-5-carboxylate reductase 2
19.2119	19.1793	19.2344	19.1435	19.2495	19.2624	19.0877	19.0862	19.0111	19.2312	19.3621	19.1776	0	10747000	2	2	11	ACI69195.1;NP_001135276.1;ACI34146.1	Proline synthetase co-transcribed bacterial homolog protein
18.5875	18.7684	18.564	18.9549	19.1319	18.8341	NaN	18.7788	NaN	NaN	19.8652	NaN	0.001065	10645000	2	2	9	ACI69357.1;ACI69701.1	ADP-ribosylation factor-like protein 1
NaN	19.7668	NaN	21.6564	19.451	21.4019	18.6991	20.6873	19.3669	19.7456	19.2206	20.512	0	22667000	2	2	13	ACI69483.1	Nattectin precursor
26.1716	26.3281	26.2378	25.8221	25.8323	25.9903	25.9798	26.0188	26.0247	25.8438	25.6917	26.0546	0	1223800000	2	11	172	ACI69495.1	Annexin A4
21.6654	21.9055	22.3648	21.9532	21.7917	22.0522	22.2062	22.2903	21.9311	21.7108	21.8387	21.5651	0.0010718	74656000	2	2	12	ACI69886.1;ACM09325.1;ACI68122.1;ADM16232.1;ACM09642.1;ACM09170.1;ACI69261.1;ACI66036.1	CutA homolog precursor
20.5095	19.6335	22.292	20.205	19.5053	20.1752	19.88	20.1425	21.0593	20.0828	19.372	19.4608	0	25106000	2	3	10	ACI69889.1	ATP synthase subunit delta, mitochondrial precursor
NaN	18.5305	18.1802	18.849	18.8467	18.9312	18.7664	NaN	19.1514	18.7171	18.9552	19.3006	0	7565100	2	2	7	NP_001159729.1;ACL37479.2	non-specific cytotoxic cell receptor protein-1
20.8365	21.0899	20.581	21.4087	20.8843	21.3792	21.0099	20.8645	21.1312	21.374	22.0863	21.856	0	46278000	2	2	22	NP_001139832.1;ACM08230.1	Translocon-associated protein subunit alpha precursor
19.6381	19.4252	19.4781	20.4164	NaN	19.7645	19.9293	19.5765	20.0486	19.7763	19.6358	19.5597	0	15756000	2	2	11	ACM08579.1;ACM08437.1;ACM08273.1	Peptidyl-prolyl cis-trans isomerase, mitochondrial precursor
21.8811	21.793	22.0037	21.7319	22.0085	21.9599	21.7243	21.5194	21.8089	21.6109	21.9923	21.436	0	65171000	2	2	25	NP_001140084.1;ACN12539.1;ACN12328.1;ACN10185.1;ACN09981.1;ACM09590.1;ACM08925.1;ACM08519.1	NADH dehydrogenase 1 alpha subcomplex subunit 4
21.2154	21.1366	21.0806	21.139	21.3884	21.1814	NaN	21.1465	21.4446	21.3963	20.8185	21.0869	0	41182000	2	4	23	ACM09511.1;ACM08830.1	Ubiquitin-conjugating enzyme E2 N
23.8797	23.9617	23.8647	24.3231	23.8348	24.1983	23.9128	23.8833	23.9862	24.1461	24.306	24.0671	0	316410000	2	8	132	ACM08851.1;ACM08204.1	Eukaryotic translation initiation factor 5A-1
22.9575	22.5459	22.3899	22.8398	24.3951	23.1073	22.6609	22.6518	22.8659	22.4323	22.6189	23.2001	0	143810000	2	2	14	ACM09754.1;ACM09522.1;ACM09091.1;ACM09024.1;ACM08863.1;ACN12204.1;ACN09857.1	Histone H1
NaN	19.8135	19.5999	19.8979	20.6735	NaN	NaN	NaN	20.6362	21.1081	19.9781	20.392	0	22358000	2	2	14	NP_001140018.1;ACM09255.1;ACN12472.1;ACN10121.1	Cathepsin L1 precursor
22.0359	22.18	22.4793	22.182	22.2442	22.1548	22.0945	22.1882	21.9874	22.2278	22.0098	21.9923	0	84823000	2	8	58	ACM09766.1	Adenylate kinase isoenzyme 2, mitochondrial
22.6273	22.334	22.6892	22.381	22.4036	22.4879	22.5288	22.4597	22.302	22.5658	22.3269	22.3695	0	104480000	2	4	58	ACN12323.1;ACN09976.1	ATP synthase subunit g, mitochondrial
24.0866	23.7127	23.6075	23.9716	23.9055	24.2556	24.2299	23.7121	23.7239	23.9992	24.3083	23.8667	0	294510000	2	6	90	AGH92552.1;NP_001158741.1;ACN12386.1;ACN10039.1	ribosomal protein L6
26.8207	26.8932	26.7234	26.9316	26.8039	26.8219	26.772	26.9527	26.8042	26.7264	26.8156	26.8154	0	2188200000	2	23	385	ACN12531.1;ACN10433.1;ACN10177.1;ACM09816.1;ACM08771.1;ACM09827.1;ACM08927.1;ACM08213.1	Tubulin beta-1 chain
24.1768	24.7746	25.0303	24.4021	23.598	24.0378	24.1162	24.8351	23.9137	24.3055	23.9072	24.5553	0	406330000	2	2	47	ACN12543.1;ACN10189.1	Malate dehydrogenase, cytoplasmic
26.436	26.3467	22.9382	26.3676	28.2772	27.02	25.9111	25.5568	27.599	27.2961	25.9147	27.8301	0	2270600000	2	3	826	ACN12747.1;ACN11070.1;ACN10385.1	Hemoglobin subunit alpha
20.3975	20.833	20.5995	20.4807	20.4883	20.4817	20.5185	20.5958	20.5102	20.3781	20.4052	20.5592	0	27631000	2	3	10	ACN10447.1;ACN58603.1	F-actin-capping protein subunit alpha-1
21.6728	21.6851	22.2216	21.5626	22.1009	22.0856	21.8477	22.2678	21.924	22.6675	22.3606	22.2521	0	82911000	2	7	52	ACN10460.1;CAC15464.1;AAV97939.1;AAV97938.1	Sodium/potassium-transporting ATPase subunit alpha-1 precursor
21.203	21.4684	21.3096	21.4204	21.2235	20.9624	21.0372	20.9924	NaN	21.0486	20.7914	20.9829	0.01	39230000	2	2	4	NP_001158803.1;ACN10502.1	Beta-1,4 N-acetylgalactosaminyltransferase 1 precursor
19.2851	19.5249	19.7252	19.362	19.9707	19.4796	19.1972	19.3751	19.1675	19.5421	19.3305	19.7865	0	13234000	2	2	29	ACN10536.1;ACH85275.1	Heterogeneous nuclear ribonucleoprotein A/B
NaN	21.1825	20.652	NaN	21.16	NaN	21.1308	NaN	21.2606	21.0926	NaN	21.1318	0.0099458	38186000	2	2	7	ACN10539.1	Rho GTPase-activating protein 15
19.376	19.1257	19.1715	19.4373	NaN	19.2899	19.3308	19.4018	19.3415	19.3154	19.5098	19.2109	0	11698000	2	2	14	ACN10581.1;ACI33248.1;ACN60204.1	TAR DNA-binding protein 43
20.8402	20.8366	19.5815	20.2704	20.6186	20.8988	20.7459	20.5066	21.0297	19.9895	20.6103	20.5477	0	28525000	2	2	23	NP_001158857.1;ACN10619.1	Macrosialin precursor
18.3903	18.3259	NaN	NaN	NaN	18.4144	18.7145	18.4475	NaN	19.2754	18.7739	19.0985	0	6659000	2	2	7	ACN10811.1;ACN10819.1	ADP-ribosylation factor GTPase-activating protein 3
19.4279	19.4156	21.1694	19.5693	19.722	19.2908	21.1209	19.5859	19.4171	19.3387	19.3461	19.445	0	17819000	2	2	5	ACN10922.1	Granulins precursor
NaN	18.7615	NaN	19.0887	NaN	18.7368	18.6883	18.8386	18.9606	19.0876	19.6003	NaN	0	7514400	2	2	7	ACN10954.1	Lon protease homolog, mitochondrial precursor
20.6908	20.4334	20.426	20.3565	20.8587	21.0956	20.5418	21.1785	20.7525	21.0404	21.2719	21.233	0	34535000	2	5	25	ACN11038.1;ACN11046.1;ACN10745.1	Sodium/potassium-transporting ATPase subunit beta-233
NaN	19.9819	NaN	20.2055	19.9931	19.8536	19.9905	20.3253	19.9188	20.2197	19.7994	20.0607	0	19357000	2	2	13	ACN11138.1	Probable saccharopine dehydrogenase
NaN	19.4146	19.3127	19.6984	19.5753	19.5821	20.1136	19.7141	19.4126	19.3457	19.5569	19.3395	0	14011000	2	2	6	ACN11145.1;ACN11152.1;ACI66123.1	Adrenodoxin, mitochondrial precursor
20.0009	20.2376	20.2857	19.4711	20.0536	20.3182	20.2938	20.3295	19.9506	20.3798	20.8378	20.3365	0	22416000	2	4	20	ACN60188.1;ACN11217.1	Heterogeneous nuclear ribonucleoprotein Q
20.1287	20.283	19.7472	20.0158	19.9816	20.271	20.1788	20.0169	19.8651	19.9663	19.9725	20.2434	0	20205000	2	2	22	NP_001167282.1;ACN11268.1	protein TFG
20.7923	20.9093	21.0556	21.1563	20.602	20.9289	21.2305	21.3584	20.5434	20.2997	20.909	21.105	0	37410000	2	2	20	NP_001167294.1;ACN11303.1	Moesin
23.4884	23.7094	23.467	23.6877	23.4401	23.6039	23.3955	23.7682	23.3277	23.5811	23.2881	23.5616	0	223050000	2	3	61	NP_001167344.1;ACN11433.1	Tubulin beta-2A chain
NaN	19.6452	19.7185	19.4538	19.5755	19.5601	19.3564	NaN	NaN	19.565	NaN	NaN	0.0010638	13613000	2	2	7	ACN58621.1	Sorting nexin-1
21.2542	21.3667	21.3132	21.9266	21.2112	21.0973	21.3673	22.1337	21.3867	21.0837	21.0836	21.1244	0	51455000	2	2	14	ACN58622.1	Aspartate aminotransferase, mitochondrial precursor
18.5485	18.6616	NaN	18.5781	18.6756	NaN	18.5885	NaN	NaN	18.8795	NaN	NaN	0	4829800	2	2	8	ACN58721.1	Glycylpeptide N-tetradecanoyltransferase 1
20.1362	19.8812	19.9114	19.8563	19.8309	20.1249	20.094	19.9971	19.9662	19.9458	20.3371	20.079	0	19249000	2	2	10	ACN58734.1;ACN58660.1	Ras GTPase-activating-like protein IQGAP1
NaN	NaN	NaN	NaN	18.9338	18.8507	18.6542	NaN	NaN	NaN	18.9766	18.8899	0	7473100	2	2	5	ACN60244.1	Fibronectin
NaN	18.938	NaN	NaN	18.7729	18.7013	18.8118	NaN	19.1402	NaN	NaN	19.0361	0.0030272	8325800	2	2	6	ACN60319.1;ACN60340.1	Cathepsin Z precursor
NaN	21.2955	20.9757	21.304	21.2899	21.2891	21.2561	21.3812	NaN	NaN	21.3072	21.4265	0.0057252	46094000	2	2	9	AEB77792.1	olfactory receptor family C subfamily 13 member 1
20.5508	20.745	20.5632	20.7931	20.7336	20.8277	21.0131	20.5877	20.6309	20.7972	21.6773	20.6479	0	33679000	2	2	13	NP_001117143.1;CAA67765.1;P86693.1	pentraxin precursor
20.0462	19.3	18.2377	19.7772	20.2316	20.0156	19.365	18.6588	20.6988	19.5101	19.6419	20.1868	0	15514000	2	2	18	CAD89353.1	glutamate dehydrogenase

## Sheet: Significant 
Protein names	TOFX vs FO	P.Value	adj.P.Val	Majority.protein.IDs	Fasta.headers	Entry name	Gene names	Human orthologue
UDP-glucuronosyltransferase (EC 2.4.1.17)	1.93215	3.82723e-05	0.0247403	NP_001133343.1;ACI33061.1	>gi|213514842|ref|NP_001133343.1| UDP-glucuronosyltransferase 2A2 [Salmo salar];>gi|209151120|gb|ACI33061.1| UDP-glucuronosyltransferase 2A2 precursor [Salmo salar]	B5X180_SALSA	UD2A2
Transport protein Sec61 subunit alpha isoform A	2.58498	6.14666e-05	0.0247403	NP_001133688.1;ACI33703.1;NP_001167418.1;ACN11112.1;ACH85336.1	>gi|213515344|ref|NP_001133688.1| transport protein Sec61 subunit alpha [Salmo salar];>gi|209154942|gb|ACI33703.1| transport protein Sec61 subunit alpha isoform A [Salmo salar];>gi|291190898|ref|NP_001167418.1| transport protein Sec61 subunit alpha [Salmo	B5X322_SALSA	S61A1	S61A1
Dolichyl-diphosphooligosaccharide--protein glycosyltransferase subunit STT3A	2.17689	0.00044516	0.0895885	NP_001135197.1;ACI33169.1;ACN10714.1	>gi|213512236|ref|NP_001135197.1| Dolichyl-diphosphooligosaccharide--protein glycosyltransferase subunit STT3A [Salmo salar];>gi|209153570|gb|ACI33169.1| Dolichyl-diphosphooligosaccharide--protein glycosyltransferase subunit STT3A [Salmo salar];>gi|2236479	B5X1I8_SALSA	STT3A	STT3A
Aldehyde dehydrogenase, mitochondrial	-1.35	0.000390334	0.0895885	ACI33614.1	>gi|209154764|gb|ACI33614.1| Aldehyde dehydrogenase	B5X2T3_SALSA	ALDH2	ALDH2
Ras-related protein Rab-1A	1.36614	0.000947397	0.0944346	ACN11413.1;ACN11075.1;ACM08940.1;NP_001134795.1;ACI68921.1	>gi|223649310|gb|ACN11413.1| Ras-related protein Rab-1A [Salmo salar];>gi|223648634|gb|ACN11075.1| Ras-related protein Rab-1A [Salmo salar];>gi|221220558|gb|ACM08940.1| Ras-related protein Rab-1A [Salmo salar];>gi|213515430|ref|NP_001134795.1| ras-related	C0HBJ4_SALSA	RAB1A	RAB1A
Phytanoyl-CoA dioxygenase, peroxisomal	1.52055	0.000760217	0.0944346	NP_001133683.1;ACI33694.1	>gi|213514550|ref|NP_001133683.1| Phytanoyl-CoA dioxygenase	B5X313_SALSA	PAHX	PHYH
Histone H3	1.58927	0.00105504	0.0944346	AGH92507.1;ADM16206.1;ADM15975.1;ACN12601.1;ACN12557.1;ACN10246.1;ACN10203.1;ACM09780.1;ACM09352.1;ACM09185.1;ACM08967.1;ACM08661.1;ACM08300.1;ACI70069.1;ACI69310.1;ACI68375.1;ACI68311.1;ACI67783.1;ACI67089.1;ACI34226.1;ACI33957.1;ACI33069.1;ACH70745.1;ADM16046.1;ACI68993.1;ACI66048.1;ACM08344.1	>gi|469832310|gb|AGH92507.1| histone H3.3 [Salmo salar];>gi|303665913|gb|ADM16206.1| Histone H3.3 [Salmo salar];>gi|303659907|gb|ADM15975.1| Histone H3.3 [Salmo salar];>gi|223672839|gb|ACN12601.1| Histone H3.3 [Salmo salar];>gi|223672751|gb|ACN12557.1| His	B5DG71_SALSA	h3f3a H33 h33	HIST2H3A
Glutathione S-transferase theta-1	1.40074	0.00129041	0.0944346	ACI68983.1;ACI34093.1	>gi|209736228|gb|ACI68983.1| Glutathione S-transferase theta-1 [Salmo salar];>gi|209155722|gb|ACI34093.1| Glutathione S-transferase theta-1 [Salmo salar]	B5X462_SALSA	GSTT1	GSTT1
Cytochrome P450 2M1	4.25448	0.00123072	0.0944346	ACN11468.1;ACI33595.1	>gi|223649420|gb|ACN11468.1| Cytochrome P450 2M1 [Salmo salar];>gi|209154726|gb|ACI33595.1| Cytochrome P450 2M1 [Salmo salar]	B5X2R4_SALSA	CP2M1
C type lectin receptor A	1.46989	0.000943233	0.0944346	NP_001117051.1;ACI66231.1;ACI33556.1;AAT77220.1	>gi|185134131|ref|NP_001117051.1| C type lectin receptor A [Salmo salar];>gi|209730724|gb|ACI66231.1| CD209 antigen-like protein E [Salmo salar];>gi|209154648|gb|ACI33556.1| CD209 antigen-like protein E [Salmo salar];>gi|50429296|gb|AAT77220.1| C type lect	Q68S98_SALSA
ATP synthase-coupling factor 6, mitochondrial	-1.44	0.00116045	0.0944346	ACI68645.1;ACI67803.1;ACI66017.1;ADM16226.1;ACI68580.1;ACI68107.1;ACI66062.1	>gi|209735552|gb|ACI68645.1| ATP synthase-coupling factor 6	B5XCS5_SALSA	ATP5J	ATP5J
ADP-ribosylation factor 1	1.59336	0.00152175	0.102084	ACN12636.1;ACN10278.1;ACI68662.1;ACI33823.1;NP_001133306.1;ACI33003.1	>gi|223672909|gb|ACN12636.1| ADP-ribosylation factor 1 [Salmo salar];>gi|223647040|gb|ACN10278.1| ADP-ribosylation factor 1 [Salmo salar];>gi|209735586|gb|ACI68662.1| ADP-ribosylation factor 1 [Salmo salar];>gi|209155182|gb|ACI33823.1| ADP-ribosylation fac	B5X3E2_SALSA	ARF1
ATP synthase subunit gamma	1.30853	0.00226939	0.140528	NP_001133150.1;ACI68114.1;ACI67381.1;ACH70803.1	>gi|213511130|ref|NP_001133150.1| ATP synthase subunit gamma	B5DGC9_SALSA	atp5c1 ATPG	ATP5C1
Catalase (EC 1.11.1.6)	1.42195	0.00245955	0.141424	ACN11170.1	>gi|223648824|gb|ACN11170.1| Catalase [Salmo salar]	C0HAV1_SALSA	CATA	CAT
Retinol dehydrogenase 3	1.88511	0.00284036	0.144527	ACI67927.1	>gi|209734116|gb|ACI67927.1| Retinol dehydrogenase 3 [Salmo salar]	B5XAQ7_SALSA	RDH3
ADP-ribosylation factor 4	1.5342	0.00287258	0.144527	ACN11168.1;ACM09105.1;ACM08502.1;ACI33863.1;ACI33187.1;ACI69928.1	>gi|223648820|gb|ACN11168.1| ADP-ribosylation factor 4 [Salmo salar];>gi|221220888|gb|ACM09105.1| ADP-ribosylation factor 4 [Salmo salar];>gi|221219682|gb|ACM08502.1| ADP-ribosylation factor 4 [Salmo salar];>gi|209155262|gb|ACI33863.1| ADP-ribosylation fac	B9ELV5_SALSA	ARF4	ARF4
Vesicle-trafficking protein SEC22b-B	1.49057	0.00355118	0.168159	ACM09495.1;ACM09163.1	>gi|221221668|gb|ACM09495.1| Vesicle-trafficking protein SEC22b-B [Salmo salar];>gi|221221004|gb|ACM09163.1| Vesicle-trafficking protein SEC22b-B [Salmo salar]	B9ENR6_SALSA	S22BB
NDRG1	-1.4	0.00394096	0.176248	ACI34120.1	>gi|209155776|gb|ACI34120.1| NDRG1 [Salmo salar]	B5X489_SALSA	NDRG1
Xaa-Pro aminopeptidase 1	-1.72	0.0050763	0.194422	NP_001135239.1;ACI33755.1	>gi|213514230|ref|NP_001135239.1| Xaa-Pro aminopeptidase 1 [Salmo salar];>gi|209155046|gb|ACI33755.1| Xaa-Pro aminopeptidase 1 [Salmo salar]	B5X374_SALSA	XPP1	XPNPEP1
Phosphomannomutase (EC 5.4.2.8)	1.28236	0.00548127	0.194422	NP_001135150.1;ACH70642.1	>gi|213512861|ref|NP_001135150.1| phosphomannomutase 2 [Salmo salar];>gi|197631837|gb|ACH70642.1| phosphomannomutase 2 [Salmo salar]	B5DFW8_SALSA	pmm2	PMM2
MOSC domain-containing protein 1, mitochondrial	-1.4	0.00581188	0.194422	ADM16049.1;ACN12681.1;ACN10321.1;ACI68118.1	>gi|303661768|gb|ADM16049.1| MOSC domain-containing protein 1	B5XB98_SALSA	MOSC1
Hydroxyacid oxidase 1	1.53566	0.00500878	0.194422	ACN12757.1;ACN10394.1;NP_001135240.1;ACI33762.1	>gi|223673151|gb|ACN12757.1| Hydroxyacid oxidase 1 [Salmo salar];>gi|223647272|gb|ACN10394.1| Hydroxyacid oxidase 1 [Salmo salar];>gi|213514408|ref|NP_001135240.1| Hydroxyacid oxidase 1 [Salmo salar];>gi|209155060|gb|ACI33762.1| Hydroxyacid oxidase 1 [Salm	C0H8M5_SALSA	HAOX1	HAO1
Elongation factor 1-beta	1.34848	0.00538389	0.194422	ACI67581.1;ACI67214.1	>gi|209733424|gb|ACI67581.1| Elongation factor 1-beta [Salmo salar];>gi|209732690|gb|ACI67214.1| Elongation factor 1-beta [Salmo salar]	B5X9R1_SALSA	EF1B
Cytochrome P450 3A27	1.54643	0.00623595	0.194422	ACI33861.1	>gi|209155258|gb|ACI33861.1| Cytochrome P450 3A27 [Salmo salar]	B5X3I0_SALSA	CP3AR
Annexin	3.37408	0.00627947	0.194422	ACN12538.1;ACN10184.1;NP_001134508.1;ACI67810.1	>gi|223672713|gb|ACN12538.1| Annexin A5 [Salmo salar];>gi|223646852|gb|ACN10184.1| Annexin A5 [Salmo salar];>gi|213514536|ref|NP_001134508.1| Annexin A5 [Salmo salar];>gi|209733882|gb|ACI67810.1| Annexin A5 [Salmo salar]	C0H815_SALSA	ANXA5	ANXA5
ADP-ribosylation factor-like protein 1	2.06632	0.00587957	0.194422	ACI69357.1;ACI69701.1	>gi|209736976|gb|ACI69357.1| ADP-ribosylation factor-like protein 1 [Salmo salar];>gi|209737664|gb|ACI69701.1| ADP-ribosylation factor-like protein 1 [Salmo salar]	B5XET7_SALSA	ARL1	ARL1
U6 snRNA-associated Sm-like protein LSm7	1.35739	0.00882087	0.19665	ACM09341.1;ACM09299.1;NP_001134195.1;ADM16255.1;ACM09425.1;ACI69490.1;ACI67697.1;ACI66967.1;ACI66561.1;ACM08503.1	>gi|221221360|gb|ACM09341.1| U6 snRNA-associated Sm-like protein LSm7 [Salmo salar];>gi|221221276|gb|ACM09299.1| U6 snRNA-associated Sm-like protein LSm7 [Salmo salar];>gi|213514586|ref|NP_001134195.1| LSM7 homolog	B9EP94_SALSA	LSM7	LSM7
Transport protein Sec61 subunit beta	1.76832	0.0080073	0.19665	ACI69072.1;NP_001135088.1;ACN12462.1;ACN12370.1;ACN10112.1;ACN10023.1;ACI70199.1;ACI70001.1;ACI69424.1;ACI69157.1	>gi|209736406|gb|ACI69072.1| transport protein Sec61 subunit beta [Salmo salar];>gi|213512795|ref|NP_001135088.1| transport protein Sec61 subunit beta [Salmo salar];>gi|223672561|gb|ACN12462.1| transport protein Sec61 subunit beta [Salmo salar];>gi|2236723	B5XE02_SALSA	SC61B	SC61B
Translocon-associated protein subunit alpha	1.56619	0.00952716	0.19665	NP_001139832.1;ACM08230.1	>gi|239985603|ref|NP_001139832.1| Translocon-associated protein subunit alpha precursor [Salmo salar];>gi|221219138|gb|ACM08230.1| Translocon-associated protein subunit alpha precursor [Salmo salar]	B9EL33_SALSA	SSRA	SSR1
Transcription factor BTF3	1.48007	0.00858186	0.19665	ACN12433.1;ACN10086.1;ACI69060.1;ACI69109.1;ACI66894.1	>gi|223672503|gb|ACN12433.1| Transcription factor BTF3 homolog 4 [Salmo salar];>gi|223646656|gb|ACN10086.1| Transcription factor BTF3 homolog 4 [Salmo salar];>gi|209736382|gb|ACI69060.1| Transcription factor BTF3 homolog 4 [Salmo salar];>gi|209736480|gb|AC	B5XDZ0_SALSA	BT3L4	BTF3L4
Sodium/potassium-transporting ATPase subunit beta	1.49333	0.00780899	0.19665	ACN11038.1	>gi|223648560|gb|ACN11038.1| Sodium/potassium-transporting ATPase subunit beta-233 [Salmo salar]	C0HAG9_SALSA	AT233
Sodium/potassium-transporting ATPase subunit alpha (EC 3.6.3.-)	1.46142	0.00943418	0.19665	ACN10460.1	>gi|223647404|gb|ACN10460.1| Sodium/potassium-transporting ATPase subunit alpha-1 precursor [Salmo salar]	C0H8U1_SALSA	AT1A1	ATP1A1
Peroxiredoxin-5, mitochondrial	-1.45	0.00689424	0.19665	ACI66176.1;AGH92554.1	>gi|209730614|gb|ACI66176.1| Peroxiredoxin-5	B5X5Q6_SALSA	PRDX5	PRDX5
Peptidyl-prolyl cis-trans isomerase	-1.26	0.00807287	0.19665	NP_001133896.1;ACI34100.1	>gi|213512345|ref|NP_001133896.1| peptidyl-prolyl cis-trans isomerase FKBP4 [Salmo salar];>gi|209155736|gb|ACI34100.1| FK506-binding protein 4 [Salmo salar]	B5X469_SALSA	FKBP4	FKBP4
Hemoglobin subunit alpha	3.72033	0.00747696	0.19665	ACN12747.1;ACN11070.1;ACN10385.1	>gi|223673131|gb|ACN12747.1| Hemoglobin subunit alpha [Salmo salar];>gi|223648624|gb|ACN11070.1| Hemoglobin subunit alpha [Salmo salar];>gi|223647254|gb|ACN10385.1| Hemoglobin subunit alpha [Salmo salar]	C0H8L6_SALSA	HBA	HBA1
Ependymin	1.65603	0.00926631	0.19665	ACN12226.1;ACN10848.1;ACN09879.1;ACI67050.1;ACI66363.1;ACI68689.1;ACI68886.1;ACM09231.1	>gi|223672089|gb|ACN12226.1| Ependymin precursor [Salmo salar];>gi|223648180|gb|ACN10848.1| Ependymin precursor [Salmo salar];>gi|223646242|gb|ACN09879.1| Ependymin precursor [Salmo salar];>gi|209732362|gb|ACI67050.1| Ependymin precursor [Salmo salar];>gi|	B5X693_SALSA	EPD
D-amino-acid oxidase	1.97035	0.00766172	0.19665	NP_001158753.1;ACN12587.1;ACN10232.1	>gi|259155383|ref|NP_001158753.1| D-amino-acid oxidase [Salmo salar];>gi|223672811|gb|ACN12587.1| D-amino-acid oxidase [Salmo salar];>gi|223646948|gb|ACN10232.1| D-amino-acid oxidase [Salmo salar]	C0H863_SALSA	OXDA	DAO
Aspartate aminotransferase (EC 2.6.1.1)	-1.63	0.0087466	0.19665	NP_001135211.1;ACI33336.1	>gi|213514496|ref|NP_001135211.1| Aspartate aminotransferase	B5X205_SALSA	AATC	GOT1
Aldehyde dehydrogenase	2.02724	0.00860491	0.19665	ACN10482.1	>gi|223647448|gb|ACN10482.1| Fatty aldehyde dehydrogenase [Salmo salar]	C0H8W3_SALSA	AL3A2
NADPH--cytochrome P450 reductase (EC 1.6.2.4)	1.67703	0.00993426	0.199927	ACN10454.1	>gi|223647392|gb|ACN10454.1| NADPH--cytochrome P450 reductase [Salmo salar]	C0H8T5_SALSA	NCPR	POR
Transmembrane emp24 domain-containing protein 9	1.26043	0.0106104	0.208326	NP_001133740.1;ADM16088.1;ACI68476.1;ACI33816.1	>gi|213514482|ref|NP_001133740.1| transmembrane emp24 domain-containing protein 9 precursor [Salmo salar];>gi|303662957|gb|ADM16088.1| Transmembrane emp24 domain-containing protein 9 precursor [Salmo salar];>gi|209735214|gb|ACI68476.1| Transmembrane emp24	B5X3D5_SALSA	TMED9	TMED9
Phosphatase 1G	1.29561	0.011279	0.216182	NP_001133844.1;ACI34005.1	>gi|213512878|ref|NP_001133844.1| protein phosphatase 1G [Salmo salar];>gi|209155546|gb|ACI34005.1| phosphatase 1G [Salmo salar]	B5X3X4_SALSA	PPM1G
4-aminobutyrate aminotransferase, mitochondrial	-1.64	0.013028	0.243896	ACI33512.1	>gi|209154560|gb|ACI33512.1| 4-aminobutyrate aminotransferase	B5X2I1_SALSA	GABT
Isocitrate dehydrogenase [NADP] (EC 1.1.1.42)	-1.28	0.015048	0.27531	NP_001133197.1;NP_001133196.1;ACN12610.1;ACN10254.1;ACH70947.1;ACH70946.1	>gi|213514332|ref|NP_001133197.1| isocitrate dehydrogenase 2-2 (NADP+)	B5DGS3_SALSA
Peroxisomal bifunctional enzyme	1.35593	0.0158352	0.277117	NP_001133776.1;ACI33880.1	>gi|213511462|ref|NP_001133776.1| Peroxisomal bifunctional enzyme [Salmo salar];>gi|209155296|gb|ACI33880.1| Peroxisomal bifunctional enzyme [Salmo salar]	B5X3J9_SALSA	ECHP	EHHADH
Hsc70-interacting protein	-1.25	0.0157125	0.277117	NP_001133946.1;ACI34192.1	>gi|213510822|ref|NP_001133946.1| Hsc70-interacting protein [Salmo salar];>gi|209155920|gb|ACI34192.1| Hsc70-interacting protein [Salmo salar]	B5X4G1_SALSA	F10A1
Signal peptidase complex subunit 1	1.39191	0.0175145	0.277245	NP_001158734.1;ACN12170.1;ACN09823.1	>gi|259155345|ref|NP_001158734.1| Signal peptidase complex subunit 1 [Salmo salar];>gi|223671977|gb|ACN12170.1| Signal peptidase complex subunit 1 [Salmo salar];>gi|223646130|gb|ACN09823.1| Signal peptidase complex subunit 1 [Salmo salar]	C0H704_SALSA	SPCS1
Lambda-crystallin	1.33567	0.017909	0.277245	NP_001133919.1;ACI34140.1;ACI66619.1	>gi|213511254|ref|NP_001133919.1| lambda-crystallin homolog precursor [Salmo salar];>gi|209155816|gb|ACI34140.1| Lambda-crystallin [Salmo salar];>gi|209731500|gb|ACI66619.1| Lambda-crystallin [Salmo salar]	B5X4A9_SALSA	CRYL1	CRYL1
Histone H1 [Cleaved into: SAMP H1] (Fragment)	1.31804	0.0175748	0.277245	P84408.3;CAI46350.1	>gi|92090603|sp|P84408.3|H1_SALSA RecName: Full=Histone H1; Contains: RecName: Full=SAMP H1;>gi|58372022|emb|CAI46350.1| histone H1 [Salmo salar]	H1_SALSA
Cathepsin L1	1.61705	0.0175263	0.277245	NP_001140018.1;ACM09255.1;ACN12472.1;ACN10121.1	>gi|226443040|ref|NP_001140018.1| Cathepsin L1 precursor [Salmo salar];>gi|221221188|gb|ACM09255.1| Cathepsin L1 precursor [Salmo salar];>gi|223672581|gb|ACN12472.1| Cathepsin L1 precursor [Salmo salar];>gi|223646726|gb|ACN10121.1| Cathepsin L1 precursor [	B9EP08_SALSA	CATL1	CTSL
Cathepsin D	1.63293	0.0164447	0.277245	ACN10838.1;ACH70630.1	>gi|223648160|gb|ACN10838.1| Cathepsin D precursor [Salmo salar];>gi|197631813|gb|ACH70630.1| cathepsin D [Salmo salar]	B5DFV6_SALSA	ctsd CATD	CTSD
Beta-1,4 N-acetylgalactosaminyltransferase 1	-1.32	0.016806	0.277245	NP_001158803.1;ACN10502.1	>gi|259155122|ref|NP_001158803.1| Beta-1	C0H8Y3_SALSA	B4GN1	B4GALNT1
Trifunctional enzyme subunit alpha, mitochondrial (Fragment)	1.29582	0.0184645	0.280452	ACN58629.1	>gi|224587261|gb|ACN58629.1| Trifunctional enzyme subunit alpha	C0PU77_SALSA	ECHA	HADHA
Glucose-6-phosphate 1-dehydrogenase (EC 1.1.1.49)	-1.64	0.0191349	0.285252	NP_001135196.1;ACI33164.1	>gi|213512060|ref|NP_001135196.1| Glucose-6-phosphate 1-dehydrogenase [Salmo salar];>gi|209153480|gb|ACI33164.1| Glucose-6-phosphate 1-dehydrogenase [Salmo salar]	B5X1I3_SALSA	G6PD	G6PD
Phosphate carrier protein, mitochondrial	1.58037	0.0206581	0.29696	ACN12696.1;ACN10336.1	>gi|223673029|gb|ACN12696.1| Phosphate carrier protein	C0H8G7_SALSA	MPCP	SLC25A3
Isovaleryl-CoA dehydrogenase, mitochondrial	-1.22	0.0205978	0.29696	ACI33497.1	>gi|209154530|gb|ACI33497.1| Isovaleryl-CoA dehydrogenase	B5X2G6_SALSA	IVD	IVD
Peroxiredoxin	-1.39	0.0211724	0.299014	ACI67145.1;ACI68683.1;NP_001134858.1;ACI69176.1;ACI67901.1	>gi|209732552|gb|ACI67145.1| Peroxiredoxin [Salmo salar];>gi|209735628|gb|ACI68683.1| Peroxiredoxin [Salmo salar];>gi|213511014|ref|NP_001134858.1| Peroxiredoxin [Salmo salar];>gi|209736614|gb|ACI69176.1| Peroxiredoxin [Salmo salar];>gi|209734064|gb|ACI679	B5X8H5_SALSA	TDX
